# Supplementary material for: Analysis of SMAD1/5 target genes in a sea anemone reveals ZSWIM4-6 as a novel BMP signaling modulator
Source: eLife. 2024 Feb 7;13:e80803. doi: 10.7554/eLife.80803 (PMC10849676; doi:10.7554/eLife.80803)
Supplement: Supplementary file 1. — Supplementary data 1 contains called peaks, curated gene list, and DE analysis of putative targets identified by anti-pSMAD1/5 ChIP. Sheet 1 (peak-calling-LG) and sheet 2 (peak-calling-4dP) contain number and positions of identified peaks at the late gastrula (LG) and in the 4 d planula (4dP) by anti-pSMAD1/5 ChIP, respectively. Sheet 3 (LG4dP-targets) depicts the curated list of putative pSMAD1/5 targets at LG and 4dP combined. Sheet 4 (BMP24MO2dvsStdMO2d-padj<0.05) and sheet 5 (GDF5lMO2dvsStdMO2d-padj<0.05) contain differentially expressed genes upon morpholino knockdown of BMP2/4 and GDF5-l with padj = 0.05. Sheet 6 (ChIP-RNA-Seq-overlap_2x) displays pSMAD1/5 targets that are differentially expressed in BMP2/4 morphants and GDF5-l morphants (2×-fold, padj = 0.05) and sheet 7 (enrichment-of-BRE-in-funct-cat) displays DE pSMAD1/5 targets containing the BRE motif. [file elife-80803-supp1.xlsx]

## Sheet: Supplementarty-data1
Title:	Analysis of SMAD1/5 target genes in a sea anemone reveals ZSWIM4-6 as a novel BMP signaling modulator.
Authors:	Paul Knabl
	Alexandra Schauer
	Autumn P. Pomreinke
	Bob Zimmermann
	Katherine W. Rogers
	Patrick Müller
	Grigory Genikhovich
contact:	grigory.genikhovich@univie.ac.at
Description:	Supplementary-data1 contains called peaks, curated gene list and DE analysis of putative targets identified by anti-pSMAD1/5 ChIP. Sheet 1 (peak-calling-LG) and Sheet 2 (peak-calling-4dP) contain number and positions of identified peaks at the late gastrula (LG) and in the 4 day planula (4dP) by anti-pSMAD1/5 ChIP, respectively. Sheet 3 (LG4dP-targets) depicts the curated list of putative pSMAD1/…

## Sheet: peak-calling-LG
#Chromosome	Start	End	Name	NPeaks	Spread	ChipSE	EnrichSE	PLG04_PZName	PLG04_PZScore	PLG04_PZChip	PLG04_PZInput	PLG04_PZEnrich	PLG04_PZFDR	PLG04_Chip	PLG04_Input	PLG04_Enrich	PLG04_Mapq	PLG06_PZName	PLG06_PZScore	PLG06_PZChip	PLG06_PZInput	PLG06_PZEnrich	PLG06_PZFDR	PLG06_Chip	PLG06_Input	PLG06_Enrich	PLG06_Mapq	PLG12_PZName	PLG12_PZScore	PLG12_PZChip	PLG12_PZInput	PLG12_PZEnrich	PLG12_PZFDR	PLG12_Chip	PLG12_Input	PLG12_Enrich	PLG12_Mapq	Multiple	Exonic	Gene (curated)	Curated Blast Hit	BRE	Remark	Overlap with enhancers from Schwaiger et al., 2014
scaffold_102	559114	559448	scaffold_102_559281	3	2.58	1.35	4.09	Peak_5955	70.86	2.95	1.16	2.55	26.69	2.94	1.15	2.55	52.22	Peak_808	226.81	7.65	0.72	10.56	24.2	7.58	0.72	10.6	56.51	Peak_8105	48.79	4.7	0.28	16.67	62.87	4.71	0.28	16.66	57.07	1	0	NVE644	Fibronectin type-III domain-containing protein 3A [Exaiptasia pallida]	yes
scaffold_102	622355	622689	scaffold_102_622522	2	9.99	1.02	6.51	Peak_5392	75.57	3.06	0.14	21.85	27.55	3.03	0.14	21.67	5.67	Peak_3750	106.45	3.76	0.22	16.76	18.39	3.73	0.22	16.67	5.58	NA	NA	NA	NA	NA	NA	0.37	2.58	0.14	16.5	1	0	NVE647	PREDICTED: centromere-associated protein E-like [Acropora digitifera]		intronnic
scaffold_104	673787	674121	scaffold_104_673954	2	4.26	2.34	13.36	Peak_405	316.82	10.64	0.85	12.46	25.69	10.44	0.84	12.37	25.84	Peak_6574	58.25	5.08	0.11	47.49	66.15	5.21	0.11	48.03	24.13	NA	NA	NA	NA	NA	NA	2.45	0.53	4.63	27.13	1	0	NVE833	unknown protein	yes
scaffold_113	448712	449046	scaffold_113_448879	2	6.35	1.94	4.84	Peak_17571	41.35	2.02	0.57	3.54	8.85	1.97	0.57	3.45	48.64	Peak_3368	100.98	7.26	0.42	17.28	73.81	7.35	0.45	16.36	50.69	NA	NA	NA	NA	NA	NA	1.16	1.74	0.66	49.13	1	0	NVE1611	unknown protein
scaffold_135	59447	59781	scaffold_135_59614	3	2.67	1.33	5.92	Peak_6883	64.65	2.76	1.1	2.51	25.23	2.75	1.09	2.51	49.26	Peak_2420	134.59	4.65	1.26	3.69	21.07	4.59	1.24	3.71	46.96	Peak_3442	99.27	7.17	0.35	20.53	73.6	7.33	0.35	20.84	47.22	1	0	NVE3440	unknown protein	yes		yes
scaffold_146	222182	222516	scaffold_146_222349	2	2.23	0.57	2.47	Peak_5455	86.06	3.15	0.19	17	16.03	3.07	0.19	16.53	60	Peak_24931	9.21	3.29	0.3	11.12	41.3	3.32	0.3	11.21	60	NA	NA	NA	NA	NA	NA	1.49	0.18	8.09	60	1	0	NVE4362	Tbx20.1	yes	intronnic
scaffold_154	351715	352049	scaffold_154_351882	3	3.14	4.54	1.91	Peak_998	192.04	6.75	0.96	6.99	34.77	6.71	0.96	6.97	60	Peak_170	612.5	20.55	1.5	13.69	24.78	20.18	1.49	13.56	60	Peak_4295	82.66	6.32	0.65	9.73	71.48	6.43	0.65	9.82	59.93	1	0	NVE5022	netrin1	yes	intronnic	yes
scaffold_154	352118	352452	scaffold_154_352285	3	3.78	8.26	47.48	Peak_427	293.62	10.15	1.14	8.93	30.46	10.07	1.13	8.89	60	Peak_80	1262.97	38.37	0.23	169.86	11.11	38.03	0.23	168.39	60	Peak_333	626.96	29.24	0.52	56.1	83.75	29.37	0.55	53.87	59.98	1	0	NVE5022	netrin1	yes	intronnic	yes
scaffold_16	1143354	1143688	scaffold_16_1143521	3	2.37	1.68	8.78	Peak_2866	111.35	4.21	2.02	2.09	32.49	4.2	2.01	2.09	60	Peak_443	300.2	10.25	0.31	33.33	25.8	9.94	0.31	32.3	60	Peak_4360	81.86	6.26	0.31	20.18	71.3	6.3	0.31	20.21	60	1	0	NVE5479	SMAD1/5	yes
scaffold_1655	881	1215	scaffold_1655_1048	2	1.52	0.36	6.29	Peak_4821	81.16	3.23	0.14	22.69	28.56	3.2	0.14	22.52	10.92	Peak_10232	58.85	2.41	0.36	6.7	11.97	2.38	0.36	6.58	13.26	NA	NA	NA	NA	NA	NA	3.62	2.17	1.67	13.42	1	0	NVE5866	unknown protein
scaffold_167	137082	137416	scaffold_167_137249	3	3.52	4.73	5.31	Peak_1100	183.73	6.46	1.12	5.79	34.52	6.42	1.11	5.77	60	Peak_169	614.59	20.55	0.86	23.93	24.89	20.25	0.84	23.98	59.98	Peak_5193	70.67	5.71	0.34	16.95	69.27	5.76	0.34	17.17	59.84	1	0	NVE5937	Ephrin-B2a [Exaiptasia pallida]	yes	intronnic	yes
scaffold_169	192649	192983	scaffold_169_192816	2	7.01	0.91	3.94	Peak_4525	84.48	3.34	0.26	12.99	29.11	3.29	0.26	12.84	7.26	Peak_5302	87.53	3.23	1.45	2.23	16.25	3.1	1.44	2.15	9.89	NA	NA	NA	NA	NA	NA	0.47	3.84	0.12	9.58	1	0	NVE6060	Protein XRP2 [Exaiptasia pallida]		intronnic
scaffold_17	398819	399153	scaffold_17_398986	2	7.16	1.86	4.27	Peak_13432	49.44	2.2	0.61	3.58	10.36	2.16	0.61	3.52	44.7	Peak_3499	97.54	7.08	0.48	14.89	73.51	7.07	0.48	14.83	41.07	NA	NA	NA	NA	NA	NA	0.99	1.06	0.94	43.08	1	0	NVE6144	Neurotrypsin [Exaiptasia pallida]
scaffold_17	454103	454437	scaffold_17_454270	3	3.05	3.27	43.34	Peak_1662	149.44	5.4	1.21	4.46	35.68	5.37	1.21	4.45	14.25	Peak_199	496.29	16.64	1.31	12.74	25.75	16.39	1.29	12.72	11.32	Peak_1250	218.52	13.08	0.09	142.53	80.9	13.12	0.09	138.42	6.96	1	0	NVE6154	Pikachurin-like [Nematostella vectensis]	yes
scaffold_17	864688	865022	scaffold_17_864855	2	3.55	0.71	2.57	Peak_21512	31.24	1.88	0.89	2.11	13.97	1.87	0.89	2.11	60	Peak_4450	96.94	3.47	0.34	10.23	17.36	3.38	0.33	10.08	60	NA	NA	NA	NA	NA	NA	0.95	0.36	2.64	60	1	0	NVE6191	Receptor-type tyrosine-protein phosphatase delta [Exaiptasia pallida]	yes		yes
scaffold_172	204110	204444	scaffold_172_204277	3	2.34	1.49	1.4	Peak_3321	102.03	3.87	0.62	6.26	31.53	3.8	0.62	6.15	59.98	Peak_701	242.03	8.24	0.74	11.14	24.79	8.08	0.74	10.97	59.85	Peak_21949	12.27	3.45	0.38	8.99	43.8	3.45	0.39	8.89	60	1	0	NVE6383	band 4.1-like protein 2 isoform X2 [Orbicella faveolata]	yes	peak located 3' of the NVE6384 - organic cation transporter protein, whose homolog is implicated in apoptosis	yes
scaffold_2	2226196	2226530	scaffold_2_2226363	2	5.96	1.77	24.34	Peak_4773	92.98	3.37	0.52	6.43	16.88	3.29	0.52	6.31	60	Peak_3431	99.38	7.16	0.09	78.63	73.64	7.27	0.09	77.42	60	NA	NA	NA	NA	NA	NA	1.22	0.47	2.61	60	1	0	NVE8198	unknown protein	yes	wrong model, desert upstream of GATA (NVE1899)_discard	yes
scaffold_2	2252739	2253073	scaffold_2_2252906	2	4.24	2.08	26.41	Peak_730	237.42	8.05	0.46	17.51	24.35	7.84	0.45	17.3	60	Peak_2606	124.18	8.4	0.1	87.84	75.98	8.63	0.1	87.74	60	NA	NA	NA	NA	NA	NA	2.03	1.05	1.94	60	1	0	NVE8199	GATA-binding factor 2 [Exaiptasia pallida]	yes		yes
scaffold_216	274021	274355	scaffold_216_274188	2	13.43	2.79	14.73	Peak_12010	53.1	2.28	0.73	3.12	11.06	2.21	0.73	3.04	54.95	Peak_2016	149.68	9.67	0.21	46.33	78.11	9.73	0.21	46.1	51.12	NA	NA	NA	NA	NA	NA	0.72	0.82	0.88	54.69	1	0	NVE9239	RNA-binding protein 41-like [Exaiptasia pallida]	yes	intronnic
scaffold_223	150412	150746	scaffold_223_150579	2	3.05	0.99	2.61	Peak_8296	57.66	2.52	0.72	3.52	23.34	2.47	0.72	3.45	59.89	Peak_2066	144.98	4.98	0.46	10.72	21.8	4.9	0.46	10.6	60	NA	NA	NA	NA	NA	NA	1.61	0.73	2.21	60	1	0	NVE9641	Muscle, skeletal receptor tyrosine-protein kinase [Exaiptasia pallida]	yes	intronnic	yes
scaffold_23	814428	814762	scaffold_23_814595	3	2.6	1.71	6.8	Peak_3905	92.62	3.62	1.56	2.32	30.28	3.59	1.55	2.31	60	Peak_607	257.55	8.74	0.81	10.75	25.7	8.56	0.72	11.81	59.97	Peak_25287	8.92	3.26	0.13	25.79	41.02	3.29	0.13	25.74	60	1	0	NVE9938		yes	likely a wrong model; the locus is between two voltage-gated potassium channel genes: NV2t002313003.1 (no NVE model) and NV2t002314001.1 (NVE9939)	yes
scaffold_237	228238	228572	scaffold_237_228405	2	4.65	0.88	3.03	Peak_4903	80.26	3.23	0.96	3.36	28.43	3.19	0.96	3.33	1.87	Peak_3974	103.12	3.66	0.35	10.53	18.06	3.61	0.34	10.52	1.76	NA	NA	NA	NA	NA	NA	0.78	2.68	0.29	0.88	1	0	NVE10247	PREDICTED: kynurenine--oxoglutarate transaminase 3-like [Amphimedon queenslandica]		peak located close to the 3' end of NV2t025703001.1 (NVE10248) - retinoschisin 1
scaffold_241	30972	31306	scaffold_241_31139	3	1.84	0.92	5.62	Peak_3478	99.38	3.8	1.22	3.12	31.06	3.78	1.21	3.11	59.83	Peak_4329	98.42	3.55	1.5	2.36	17.48	3.47	1.42	2.45	59.74	Peak_4244	83.38	6.34	0.32	19.75	71.62	6.39	0.33	19.63	59.85	1	0	NVE10482	opsin [Nematostella vectensis]			yes
scaffold_241	353404	353738	scaffold_241_353571	2	6	1.02	7.1	Peak_9897	51.86	2.36	0.82	2.89	21.37	2.31	0.82	2.83	60	Peak_2757	126.2	4.35	0.18	24.07	20.34	4.22	0.18	23.39	60	NA	NA	NA	NA	NA	NA	0.7	0.49	1.43	60	1	0	NVE10513	Bifunctional heparan sulfate N-deacetylase/N-sulfotransferase [Exaiptasia pallida]		intronnic	yes
scaffold_243	306873	307207	scaffold_243_307040	2	4.38	1.68	6.82	Peak_15927	44.28	2.08	0.46	4.47	9.44	1.99	0.39	5.16	59.98	Peak_3841	90.52	6.7	0.29	23.18	72.68	6.79	0.29	23.12	59.91	NA	NA	NA	NA	NA	NA	1.55	1.78	0.87	59.2	1	0	NVE10582	Cyclic AMP-dependent transcription factor ATF-6 alpha [Exaiptasia pallida]		intronnic
scaffold_25	945827	946161	scaffold_25_945994	2	3.78	1.48	4.96	Peak_1790	155.28	5.31	0.73	7.25	22.54	5.19	0.72	7.16	60	Peak_3823	90.86	6.73	0.36	18.58	72.72	6.85	0.37	18.72	59.91	NA	NA	NA	NA	NA	NA	1.81	0.95	1.91	59.81	1	0	NVE10856	coagulation factor VIII-like [Exaiptasia pallida]		peak located between 5' ends of two genes. The second (slightly more distant) gene is NVE10857 - Cytochrome C oxidase subunit 4	yes
scaffold_257	182196	182530	scaffold_257_182363	2	3.12	1.43	5.15	Peak_9183	63	2.53	0.89	2.84	12.63	2.5	0.89	2.8	42.87	Peak_4052	86.56	6.5	0.35	18.72	72.13	6.58	0.38	17.45	56.15	NA	NA	NA	NA	NA	NA	2.11	1.6	1.31	42.38	1	0	NVE11125	PREDICTED: neuroblast differentiation-associated protein AHNAK-like [Austrofundulus limnaeus]		intronnic
scaffold_26	1275656	1275990	scaffold_26_1275823	3	2.38	1.03	8.37	Peak_10504	50.06	2.3	0.44	5.28	20.84	2.26	0.43	5.2	60	Peak_1699	159.08	5.42	0.17	32.16	22.67	5.31	0.17	31.54	60	Peak_6102	61.7	5.24	0.16	33.46	67.23	5.37	0.19	28.89	60	1	0	NVE11345	HoxB [Nematostella vectensis]	yes	intronnic
scaffold_26	1277700	1278034	scaffold_26_1277867	2	3.71	2.2	10.73	Peak_606	257.61	8.76	1.24	7.07	25.74	8.62	1.23	7.03	60	Peak_2054	148.23	9.6	0.27	35.95	77.9	9.68	0.27	36.26	60	NA	NA	NA	NA	NA	NA	2.61	1.49	1.75	60	1	0	NVE11345	HoxB [Nematostella vectensis]
scaffold_26	1278269	1278603	scaffold_26_1278436	3	3.02	1.46	2.26	Peak_9474	53.18	2.4	0.92	2.61	21.84	2.38	0.92	2.59	60	Peak_896	215.57	7.33	0.7	10.53	24.45	7.19	0.69	10.42	60	Peak_24481	9.61	3.34	0.53	6.3	41.63	3.39	0.54	6.32	59.92	1	0	NVE11345	HoxB [Nematostella vectensis]	yes		yes
scaffold_267	161493	161827	scaffold_267_161660	2	3.31	0.61	3.53	Peak_10679	49.58	2.3	1.09	2.11	20.66	2.23	1.09	2.05	58.66	Peak_5751	83.49	3.08	0.22	13.93	15.54	3	0.22	13.58	59.97	NA	NA	NA	NA	NA	NA	0.91	0.21	4.25	59.43	1	0	NVE11604	PREDICTED: protein scribble homolog [Acropora digitifera]		two models (NVE11603 and NVE11604) stand for the same gene, intronic peak	yes
scaffold_267	87038	87372	scaffold_267_87205	2	4.78	2.12	3.32	Peak_26959	24.38	1.77	0.74	2.38	12.26	1.75	0.74	2.36	20.89	Peak_656	248.95	8.45	0.6	13.99	25.37	8.34	0.61	13.78	21.17	NA	NA	NA	NA	NA	NA	2.22	0.24	9.27	20.29	1	0	NVE11600	Zinc finger protein 395 [Exaiptasia pallida]	yes
scaffold_268	227559	227893	scaffold_268_227726	2	1.93	0.56	5.92	Peak_11029	48.66	2.26	0.49	4.58	20.28	2.24	0.49	4.54	60	Peak_3620	108.56	3.82	0.16	23.64	18.72	3.74	0.16	23.24	60	NA	NA	NA	NA	NA	NA	1.94	0.3	6.56	60	1	0	NVE11645	G-protein-coupled receptor 101-like	yes	Alternative target is NVE11646 (NV2t013251001.1) Ankyrin repeat domain-containing protein 31	yes
scaffold_277	306631	306965	scaffold_277_306798	2	8.33	0.78	3.06	Peak_13866	42.44	2.12	1.01	2.09	17.93	2.11	1.01	2.09	4.12	Peak_5939	81.75	3.04	0.3	10.06	15.3	3.02	0.3	10.13	3.3	NA	NA	NA	NA	NA	NA	0.36	2.82	0.13	8	1	0	NVE12012	Solute carrier family 28 member 3 [Exaiptasia pallida]		much better model NV2t009280001.1
scaffold_3	1512076	1512410	scaffold_3_1512243	2	3.13	0.97	3.53	Peak_2167	129.93	4.75	0.4	11.81	34.21	4.72	0.4	11.76	15.79	Peak_3417	112.48	3.99	1.84	2.17	18.93	3.93	1.82	2.16	15.95	NA	NA	NA	NA	NA	NA	1.51	3.93	0.38	17.68	1	0	NVE12941	Tetratricopeptide repeat protein 21B [Exaiptasia pallida]
scaffold_3	2235741	2236075	scaffold_3_2235908	2	7.65	1.52	5.68	Peak_10857	49.12	2.29	1.07	2.14	20.47	2.27	1.07	2.12	59.88	Peak_1322	179.56	6.06	0.31	19.82	23.01	5.88	0.3	19.49	59.92	NA	NA	NA	NA	NA	NA	0.77	0.27	2.8	60	1	0	NVE12998	HoxE [Nematostella vectensis]	yes
scaffold_3	2239025	2239359	scaffold_3_2239192	3	3.41	1.87	3.97	Peak_7511	61.2	2.64	0.97	2.73	24.38	2.62	0.97	2.71	57.96	Peak_558	267.75	9.07	0.54	16.69	25.5	8.93	0.54	16.43	56.94	Peak_9223	43.64	4.49	0.44	10.2	60.6	4.52	0.44	10.18	55.79	1	0	NVE12998	HoxE [Nematostella vectensis]	yes
scaffold_30	1400585	1400919	scaffold_30_1400752	3	2.93	3.17	4.92	Peak_1919	139.05	5.04	0.71	7.07	34.64	4.99	0.71	7.02	59.98	Peak_233	439.37	14.82	0.77	19.19	27.41	14.63	0.77	19.03	60	Peak_6269	60.37	5.18	0.22	23.42	66.87	5.23	0.22	23.52	60	1	0	NVE13181	Dual specificity phosphatase 7 [Nematostella vectensis]	yes		yes
scaffold_31	1313190	1313524	scaffold_31_1313357	2	2.75	1.16	4.93	Peak_11748	46.96	2.22	0.66	3.37	19.64	2.21	0.66	3.37	60	Peak_1267	183.1	6.17	0.51	12.03	23.26	6.08	0.51	11.97	59.95	NA	NA	NA	NA	NA	NA	3.22	0.16	20.45	60	1	0	NVE13609	Benzoate carboxyl methyltransferase [Exaiptasia pallida]		possible alternative target is NVE13610 (NV2t022355002.1) - ETS transcription factor ETV7, highly significant in BMP2/4 KD padj=2.23e-19, upregulated more than 3-fold upon BMP2/4 KD	yes
scaffold_32	1273201	1273535	scaffold_32_1273368	3	3.9	20.05	89.93	Peak_123	690.4	22.82	0.94	24.24	22.15	22.71	0.94	24.18	60	Peak_56	2521.23	75.49	1.87	40.42	13.85	74.73	1.84	40.54	59.99	Peak_33	2106.25	88.72	0.29	303.52	87.45	88.58	0.29	301.78	59.99	1	0	NVE13981	Zinc finger protein GLIS3 [Exaiptasia pallida]	yes		yes
scaffold_320	149505	149839	scaffold_320_149672	3	1.28	0.28	2.85	Peak_4934	79.92	3.23	1.33	2.43	28.38	3.2	1.32	2.42	60	Peak_3141	117.93	4.11	0.36	11.55	19.52	3.99	0.35	11.29	60	Peak_28716	6.69	3.11	0.29	10.72	38.61	3.12	0.29	10.61	60	1	0	NVE13995	RNA-binding E3 ubiquitin-protein ligase MEX3C [Exaiptasia pallida]			yes
scaffold_346	137826	138160	scaffold_346_137993	3	2.31	2.33	15.81	Peak_1606	152.69	5.5	1.73	3.18	35.58	5.49	1.73	3.18	59.96	Peak_299	373.93	12.86	1.27	10.16	27.07	12.69	1.25	10.17	60	Peak_4927	74.2	5.88	0.11	53.26	69.84	5.96	0.11	53.72	60	1	0	NVE14737	upstream of unknown NVE14378 and downstream of ZnF protein 36, C3H1 type-like 2-B	yes		yes
scaffold_35	817656	817990	scaffold_35_817823	2	6.37	1.63	4.2	Peak_14781	46.51	2.13	0.67	3.2	9.84	2.06	0.59	3.5	59.98	Peak_4424	80.94	6.22	0.38	16.49	71.12	6.32	0.39	16.39	59.96	NA	NA	NA	NA	NA	NA	0.99	0.24	4.1	59.97	1	0	NVE14900	Eukaryotic translation initiation factor 2-alpha kinase 4 [Exaiptasia pallida]		intronnic
scaffold_357	218877	219211	scaffold_357_219044	2	6.18	2.23	3.19	Peak_967	195.12	6.86	0.64	10.63	34.49	6.8	0.64	10.57	1.4	Peak_583	261.08	8.99	3.86	2.33	25.83	8.93	3.85	2.32	1.41	NA	NA	NA	NA	NA	NA	1.44	19.42	0.07	0.09	1	0	NVE15111	DDB1- and CUL4-associated factor 6 [Exaiptasia pallida]
scaffold_358	20407	20741	scaffold_358_20574	2	2.42	0.55	2.86	Peak_4873	80.59	3.22	0.28	11.61	28.44	3.19	0.28	11.53	60	Peak_16099	44	2.08	0.76	2.73	9.37	2.03	0.75	2.72	60	NA	NA	NA	NA	NA	NA	1.32	0.41	3.24	60	1	0	NVE15117	La-related protein 1 [Exaiptasia pallida]
scaffold_38	393600	393934	scaffold_38_393767	2	21.86	1.07	3.75	Peak_3810	94.02	3.65	1.23	2.96	30.5	3.62	1.23	2.95	4.45	Peak_5508	85.59	3.14	0.24	12.88	15.93	3.04	0.24	12.45	4.53	NA	NA	NA	NA	NA	NA	0.17	3.94	0.04	0	1	0	NVE15803	OTU domain-containing protein 4-like [Acropora digitifera]		intronic
scaffold_385	83077	83411	scaffold_385_83244	3	2.01	0.91	8.05	Peak_5826	71.72	2.97	1.09	2.74	26.87	2.93	1.08	2.71	59.87	Peak_1685	159.78	5.45	0.4	13.49	22.46	5.36	0.41	13.23	60	Peak_5033	72.72	5.81	0.19	29.82	69.62	5.89	0.19	30.32	59.95	1	0	NVE15986	Zinc finger protein 503 [Exaiptasia pallida]
scaffold_385	83348	83682	scaffold_385_83515	2	4.15	1.84	9.58	Peak_1189	188.24	6.34	0.67	9.41	23.64	6.2	0.66	9.42	59.87	Peak_2796	117.25	8.08	0.24	33.04	75.4	8.24	0.25	33.39	59.85	NA	NA	NA	NA	NA	NA	1.98	1.29	1.53	59.83	1	0	NVE15986	Zinc finger protein 503 [Exaiptasia pallida]
scaffold_385	84175	84509	scaffold_385_84342	3	2.24	1.54	3.67	Peak_2757	113.83	4.25	1.08	3.95	32.82	4.23	1.08	3.93	60	Peak_494	282.49	9.58	0.87	11.05	26.38	9.48	0.86	11.07	59.95	Peak_4870	75.16	5.94	0.33	17.75	69.95	6.01	0.36	16.6	60	1	0	NVE15986	Zinc finger protein 503 [Exaiptasia pallida]			yes
scaffold_385	84573	84907	scaffold_385_84740	3	2.45	1.64	7.19	Peak_4141	89.36	3.52	1.33	2.63	29.73	3.46	1.33	2.6	59.93	Peak_660	248.12	8.4	0.59	14.28	25.34	8.3	0.59	14.08	59.95	Peak_2602	124.33	8.41	0.3	27.63	75.99	8.47	0.31	27.48	60	1	0	NVE15986	Zinc finger protein 503 [Exaiptasia pallida]			yes
scaffold_39	1084417	1084751	scaffold_39_1084584	3	3.16	2.34	9.71	Peak_3598	97.33	3.71	0.44	8.48	30.78	3.69	0.44	8.44	59.94	Peak_339	347.89	11.79	0.5	23.62	26.94	11.64	0.49	23.52	60	Peak_4444	80.63	6.19	0.15	42.28	71.08	6.25	0.15	42.01	60	1	0	NVE16132	gremlin [Nematostella vectensis]			yes
scaffold_39	1086859	1087193	scaffold_39_1087026	3	3.06	4.65	8.96	Peak_825	209.52	7.38	0.72	10.22	33.73	7.33	0.72	10.17	60	Peak_139	728.17	22.79	1.09	20.89	22.78	22.42	1.08	20.71	60	Peak_1967	153.17	9.84	0.24	40.94	78.27	10	0.25	40.71	60	1	0	NVE16132	gremlin [Nematostella vectensis]	yes
scaffold_39	862419	862753	scaffold_39_862586	2	6.83	1.45	3.58	Peak_1990	136.14	4.98	1.64	3.03	34.73	4.94	1.64	3.02	10.92	Peak_1817	154.29	5.26	0.44	12.01	22.45	5.25	0.43	12.08	11.72	NA	NA	NA	NA	NA	NA	0.77	3.29	0.23	25.7	1	0	NVE16106	A disintegrin and metalloproteinase with thrombospondin motifs 9 [Exaiptasia pallida]		intronic
scaffold_4	1341001	1341335	scaffold_4_1341168	3	4.24	6.08	1.83	Peak_736	222.17	7.86	1	7.82	33.51	7.74	1	7.72	59.97	Peak_117	816.5	25.6	2.1	12.17	22.52	24.97	2.08	12	59.99	Peak_5016	73.01	5.84	0.42	13.75	69.66	5.89	0.42	13.91	59.97	1	0	NVE16405	nanos2	yes		yes
scaffold_4	1536909	1537243	scaffold_4_1537076	2	6.75	1.51	38	Peak_2795	125.38	4.33	0.14	30.06	20.23	4.31	0.14	29.96	0	Peak_8767	45.55	6.01	0.05	130.1	61.51	6.02	0.05	130.31	0	NA	NA	NA	NA	NA	NA	0.89	0.14	6.37	0	1	0	NVE16429	Cathepsin d		Alternative target NVE16428 - Hermansky–Pudlak syndrome 5 protein (downregulated in BMP2/4MO, padj = 0,0000100939937461178, fold change 0,357)
scaffold_4	627956	628290	scaffold_4_628123	2	3.12	1.12	3.79	Peak_2252	139.59	4.79	0.46	10.38	21.2	4.66	0.46	10.23	54.71	Peak_5967	62.75	5.3	0.37	14.14	67.56	5.39	0.38	14.21	55.03	NA	NA	NA	NA	NA	NA	1.73	1.25	1.38	51.26	1	0	NVE16340	Dual specificity protein phosphatase 1 [Exaiptasia pallida]			yes
scaffold_46	195433	195767	scaffold_46_195600	2	2.86	0.86	5.54	Peak_3483	111.39	3.91	0.2	19.26	18.85	3.83	0.2	18.83	60	Peak_10734	37.91	4.28	0.25	16.99	57.77	4.3	0.26	16.78	60	NA	NA	NA	NA	NA	NA	1.5	1.16	1.3	60	1	0	NVE18028	Tiggy-winkle hedgehog protein [Exaiptasia pallida]			yes
scaffold_46	195936	196270	scaffold_46_196103	3	4.51	1.99	14.47	Peak_17177	37.07	1.99	0.84	2.37	15.95	1.96	0.84	2.33	60	Peak_2044	145.77	5	0.46	10.76	21.9	4.93	0.46	10.61	60	Peak_2392	132.3	8.8	0.18	49.13	76.69	8.81	0.18	49.29	60	1	0	NVE18028	Tiggy-winkle hedgehog protein [Exaiptasia pallida]	yes		yes
scaffold_469	10753	11087	scaffold_469_10920	2	3.84	1.06	3.62	Peak_4636	83.14	3.32	1.17	2.83	28.88	3.3	1.17	2.81	60	Peak_1998	147.25	5.05	0.36	13.9	22.04	4.97	0.36	13.77	60	NA	NA	NA	NA	NA	NA	1.29	0.43	2.99	60	1	0	NVE18219	unknown protein		Alternative target NVE18218 (BMP2/4MO padj = 6,47596083492793E-10, fold change = 2,171)	yes
scaffold_48	561790	562124	scaffold_48_561957	2	6.23	0.94	5.79	Peak_8148	58.26	3.1	0.63	4.94	23.52	3.08	0.63	4.91	9.43	Peak_3799	105.86	3.74	0.19	20.04	18.3	3.67	0.19	19.65	10.31	NA	NA	NA	NA	NA	NA	0.59	1.23	0.48	2.5	1	0	NVE18508	Actin-depolymerizing factor 1 [Exaiptasia pallida]		intronic
scaffold_5	1188230	1188564	scaffold_5_1188397	3	5.29	5.14	38.53	Peak_2811	112.93	4.21	0.6	7.02	32.65	4.14	0.6	6.91	60	Peak_251	416.84	14.12	0.87	16.16	27.87	13.96	0.87	16.12	60	Peak_549	430.28	21.82	0.17	128.34	83.27	21.89	0.17	126.82	59.99	1	0	NVE18982	PREDICTED: kinesin-like protein KIF26B [Acropora digitifera]	yes		yes
scaffold_51	1087596	1087930	scaffold_51_1087763	3	3.26	1.81	1.34	Peak_6483	67.2	2.81	0.28	9.87	25.75	2.75	0.28	9.68	59.86	Peak_555	268.27	9.1	1.1	8.29	25.6	8.97	1.1	8.18	59.96	Peak_4104	85.59	6.46	0.51	12.7	72.01	6.49	0.51	12.74	60	1	0	NVE19435	RNA-dependent RNA polymerase 2 [Exaiptasia pallida]	yes	wrong target assignment - real target NV2t018099001.1 (no NVE model), sprouty homolog	yes
scaffold_525	72309	72643	scaffold_525_72476	2	8.71	3.67	4.94	Peak_27113	24.19	1.76	0.48	3.69	12.2	1.74	0.48	3.66	10.74	Peak_1323	207.63	12.59	0.69	18.38	80.7	12.59	0.69	18.36	3.1	NA	NA	NA	NA	NA	NA	1.45	0.42	3.43	20.23	1	0	NVE19673	unknown protein		between 3' ends of the NVE19673 and NVE19674 (the latter being a Serine/threonine-protein kinase NLK [Exaiptasia pallida])
scaffold_53	405112	405446	scaffold_53_405279	3	4.45	6.73	23.88	Peak_1192	176.07	6.21	0.96	6.45	34.86	6.16	0.96	6.41	59.93	Peak_118	812.54	25.4	0.31	82.89	22.88	25.04	0.3	82.13	60	Peak_386	560.14	27.1	0.37	73.69	83.53	27.42	0.38	73.09	59.93	1	0	NVE19762	goosecoid [Nematostella vectensis]	yes		yes
scaffold_53	405740	406074	scaffold_53_405907	3	3.95	2.97	13.23	Peak_5331	76.05	3.09	0.75	4.11	27.7	3.04	0.75	4.06	60	Peak_314	361.99	12.27	0.56	22.05	27.48	12.04	0.55	22.05	59.96	Peak_1467	191.68	11.8	0.24	48.99	80.12	11.88	0.24	49.57	59.95	1	0	NVE19762	goosecoid [Nematostella vectensis]			yes
scaffold_53	413452	413786	scaffold_53_413619	3	3.63	1.51	3.76	Peak_19224	34.22	1.93	0.75	2.56	14.9	1.89	0.75	2.52	60	Peak_936	210.23	7.11	0.56	12.72	24.46	6.89	0.56	12.39	60	Peak_5268	69.79	5.66	0.35	16.04	69.1	5.71	0.39	14.81	59.84	1	0	NVE19762	goosecoid [Nematostella vectensis]		intronic
scaffold_543	58096	58430	scaffold_543_58263	2	6.12	0.81	4.57	Peak_6781	65.25	2.77	1.01	2.76	25.38	2.72	1	2.71	15.19	Peak_5480	85.82	3.15	0.2	15.45	15.99	3.08	0.2	15.13	16.01	NA	NA	NA	NA	NA	NA	0.5	1.17	0.43	14.4	1	0	NVE20018	Phosphatidylinositol phosphatase PTPRQ [Exaiptasia pallida]		intronic
scaffold_58	1033483	1033817	scaffold_58_1033650	3	3.41	7.25	38.3	Peak_431	292.16	10.08	1.08	9.33	30.37	9.89	1.01	9.84	59.95	Peak_86	1137.97	34.6	0.88	39.21	10.42	33.72	0.8	42.14	59.95	Peak_1029	259.73	14.89	0.11	136.86	81.54	14.96	0.11	137.43	59.8	1	0	NVE20684	Gbx [Nematostella vectensis]	yes		yes
scaffold_58	1035888	1036222	scaffold_58_1036055	2	5.01	1.64	6.69	Peak_10956	48.91	2.27	0.45	4.99	20.36	2.26	0.45	4.98	60	Peak_1000	201.62	6.75	0.27	25.17	24.87	6.65	0.27	24.81	60	NA	NA	NA	NA	NA	NA	1.33	0.3	4.49	60	1	0	NVE20684	Gbx [Nematostella vectensis]	yes
scaffold_6	112493	112827	scaffold_6_112660	2	1.59	0.32	3.44	Peak_8963	55	2.45	0.84	2.91	22.38	2.41	0.84	2.87	60	Peak_5770	83.35	3.07	0.21	14.72	15.54	3	0.21	14.37	60	NA	NA	NA	NA	NA	NA	1.89	0.17	11.34	59.95	1	0	NVE20898	Nk5
scaffold_62	841465	841799	scaffold_62_841632	2	1.63	0.61	2.92	Peak_4665	82.81	3.28	0.32	10.12	28.81	3.27	0.32	10.1	8.84	Peak_3391	113.02	4.01	1.88	2.13	18.95	3.96	1.88	2.1	8.77	NA	NA	NA	NA	NA	NA	5.35	7.36	0.73	7.81	1	0	NVE21447	unknown protein		likely a wrong model not supported by the NV2 models. The peak is between NVE21446 (Orthopedia) and NVE21448 (unknown protein).
scaffold_65	595486	595820	scaffold_65_595653	3	2.6	2.11	2.78	Peak_2426	122.74	4.53	1.05	4.31	33.3	4.47	1.05	4.27	60	Peak_392	321.07	10.76	0.79	13.57	26.18	10.59	0.79	13.41	60	Peak_12829	31.04	4.07	0.66	6.18	54.44	4.08	0.66	6.2	60	1	0	NVE21766	Tbx3			yes
scaffold_66	222291	222625	scaffold_66_222458	2	9.52	1.34	9.92	Peak_4741	93.36	3.37	0.16	21.42	16.94	3.29	0.16	20.91	26.73	Peak_6486	58.84	5.11	0.14	36.5	66.34	5.15	0.14	36.51	25.68	NA	NA	NA	NA	NA	NA	0.54	0.25	2.2	22.82	1	0	NVE21866	Neurexin-4 [Stylophora pistillata]	yes	Alternative target NVE21865 (rho guanine nucleotide exchange factor 10)
scaffold_66	235418	235752	scaffold_66_235585	3	3.11	2	11.4	Peak_4866	80.66	3.24	0.9	3.6	28.47	3.21	0.9	3.58	59.92	Peak_745	235.35	7.97	0.47	17.09	24.29	7.86	0.46	16.91	60	Peak_1942	154.46	9.9	0.23	43.31	78.38	9.98	0.24	42.43	60	1	0	NVE21867	ski oncogene-like [Exaiptasia pallida]		NVE21868 is a wrong model; peak reassigned to NVE21867	yes
scaffold_71	522162	522496	scaffold_71_522329	3	2.78	2.74	7.62	Peak_1937	138.23	5	0.57	8.72	34.69	4.94	0.57	8.63	59.75	Peak_260	410.97	13.96	1.27	11	27.78	13.71	1.26	10.91	59.98	Peak_4459	80.49	6.19	0.19	33.37	71.03	6.21	0.19	32.55	60	1	0	NVE22735	chordin [Nematostella vectensis]	yes		yes
scaffold_72	254070	254404	scaffold_72_254237	3	2.3	1.14	3.72	Peak_5656	73.29	3.02	1.29	2.35	27.13	2.98	1.28	2.32	60	Peak_965	206.52	6.95	0.58	11.93	24.49	6.86	0.58	11.86	60	Peak_11078	36.76	4.24	0.29	14.7	57.17	4.26	0.29	14.57	60	1	0	NVE22860	BMPRII [Nematostella vectensis]	yes
scaffold_81	71002	71336	scaffold_81_71169	3	3.58	2.49	35.13	Peak_4874	80.59	3.23	0.7	4.6	28.44	3.2	0.7	4.57	60	Peak_491	283.24	9.6	0.58	16.52	26.39	9.48	0.58	16.27	59.98	Peak_1554	183.33	11.38	0.1	118.11	79.84	11.46	0.1	115.31	60	1	0	NVE24266	achaete-scute B [Nematostella vectensis]	yes		yes
scaffold_81	74610	74944	scaffold_81_74777	3	2.22	1.3	8.42	Peak_4623	83.27	3.31	0.7	4.7	28.91	3.28	0.7	4.68	60	Peak_849	222.05	7.49	1.04	7.17	24.26	7.29	1.03	7.05	60	Peak_3624	94.87	6.93	0.22	30.93	73.23	7.1	0.23	31.04	60	1	0	NVE24266	achaete-scute B [Nematostella vectensis]
scaffold_9	1499967	1500301	scaffold_9_1500134	3	2.44	1.88	18.72	Peak_2694	115.7	4.33	1.48	2.93	32.7	4.28	1.47	2.91	59.8	Peak_410	315.6	10.63	1.08	9.85	25.59	10.46	1.07	9.76	60	Peak_2282	137.66	9.04	0.12	75.94	76.97	9.12	0.15	62.17	60	1	0	NVE25316	ZnF protein with a SWIM domain	yes		yes
scaffold_9	1500643	1500977	scaffold_9_1500810	2	1.86	0.85	6.54	Peak_1222	185.97	6.25	0.33	19.15	23.53	6.14	0.33	18.76	59.87	Peak_14387	26.75	3.92	0.17	23.18	52.14	4.02	0.17	23.06	60	NA	NA	NA	NA	NA	NA	3.3	1.99	1.66	60	1	0	NVE25316	ZnF protein with a SWIM domain	yes		yes
scaffold_9	1503621	1503955	scaffold_9_1503788	3	3.81	10.78	45.13	Peak_300	358.79	12.32	1.36	9.06	27.18	12.23	1.36	9.02	60	Peak_75	1406.9	42.56	1.07	39.8	11.76	42.11	1.07	39.5	59.99	Peak_113	1081.07	46.4	0.29	158.51	87.23	46.57	0.3	157.06	59.99	1	0	NVE25316	ZnF protein with a SWIM domain	yes	intronic	yes
scaffold_9	1503956	1504290	scaffold_9_1504123	3	2.94	4.79	9.01	Peak_619	244.72	8.56	1.4	6.13	31.68	8.48	1.39	6.09	60	Peak_120	809.91	25.24	1.09	23.21	22.58	24.92	1.09	22.85	59.99	Peak_1043	256.87	14.78	0.39	38.22	81.5	14.75	0.4	37.26	59.96	1	0	NVE25316	ZnF protein with a SWIM domain	yes	intronic	yes
scaffold_9	1504227	1504561	scaffold_9_1504394	3	3.46	7.29	34.36	Peak_404	300.03	10.31	1.67	6.19	30.46	10.26	1.66	6.18	60	Peak_84	1172.19	36.11	0.95	38.2	10.64	35.53	0.93	38.14	59.98	Peak_505	457.42	22.94	0.19	121.08	83.31	23.29	0.19	121.45	59.97	1	0	NVE25316	ZnF protein with a SWIM domain	yes	intronic	yes
scaffold_9	1504549	1504883	scaffold_9_1504716	2	2.81	2.74	8.99	Peak_231	444.79	15	0.57	26.33	27.13	14.76	0.57	25.77	60	Peak_1890	157.18	10.02	0.3	33.41	78.63	10.09	0.3	33.62	59.91	NA	NA	NA	NA	NA	NA	5.26	1.46	3.6	60	1	0	NVE25316	ZnF protein with a SWIM domain		intronic	yes
scaffold_9	1506635	1506969	scaffold_9_1506802	3	2.03	1.63	5.46	Peak_1831	142.36	5.17	1.67	3.09	35.23	5.14	1.67	3.08	60	Peak_401	317.44	10.66	1.3	8.17	25.88	10.43	1.14	9.18	59.82	Peak_2098	146.1	9.5	0.4	23.48	77.73	9.5	0.44	21.63	60	1	0	NVE25316	ZnF protein with a SWIM domain	yes	intronic	yes
scaffold_9	1507481	1507815	scaffold_9_1507648	2	4.21	2.54	3.08	Peak_1907	139.31	5.06	1.26	4.02	34.74	4.99	1.25	3.98	59.95	Peak_356	337.46	11.41	1.1	10.41	26.45	11.16	1.09	10.25	59.97	NA	NA	NA	NA	NA	NA	2.65	0.18	14.58	60	1	0	NVE25316	ZnF protein with a SWIM domain		intronic	yes
scaffold_9	1508694	1509028	scaffold_9_1508861	3	4.01	7.63	33.76	Peak_760	217.3	7.67	0.83	9.29	33.62	7.64	0.82	9.27	60	Peak_99	1017.96	31.06	1.63	19.08	15.38	30.59	1.53	19.94	60	Peak_309	655.55	30.23	0.26	116.07	83.96	30.46	0.26	115.47	60	1	0	NVE25316	ZnF protein with a SWIM domain	yes	intronic	yes
scaffold_9	366844	367178	scaffold_9_367011	2	7.99	0.88	5.08	Peak_8056	58.63	2.56	1.1	2.34	23.68	2.54	1.09	2.32	36.4	Peak_4698	93.87	3.39	0.2	16.94	17	3.37	0.2	16.87	36.73	NA	NA	NA	NA	NA	NA	0.42	0.42	1	43.39	1	0	NVE25219	EGF-like repeat and discoidin I-like domain-containing protein 3 [Exaiptasia pallida]		intronic
scaffold_9	530927	531261	scaffold_9_531094	2	2.26	0.77	4.26	Peak_15959	38.93	2.02	0.41	4.9	16.66	2	0.41	4.86	59.97	Peak_2422	134.58	4.62	0.25	18.55	21.06	4.53	0.25	18.18	60	NA	NA	NA	NA	NA	NA	2.56	0.43	6.01	60	1	0	NVE25227	Patched	yes
scaffold_92	54391	54725	scaffold_92_54558	3	3	1.58	3.83	Peak_7232	62.76	2.68	0.85	3.15	24.71	2.66	0.85	3.13	60	Peak_1093	195.44	6.6	1.06	6.21	24.15	6.48	1.06	6.13	60	Peak_2887	114.23	7.92	0.48	16.49	75.12	7.97	0.5	15.84	60	1	0	NVE25536	Ets domain transcription factor ERG [Nematostella vectensis]	yes		yes
scaffold_92	60787	61121	scaffold_92_60954	3	2.9	3.03	4.39	Peak_1588	153.62	5.53	1.62	3.4	35.58	5.48	1.62	3.38	60	Peak_214	475.08	16.09	2.48	6.48	26.71	15.89	2.46	6.47	59.95	Peak_1503	188.01	11.67	0.63	18.46	80.01	11.8	0.66	17.81	59.95	1	0	NVE25536	Ets domain transcription factor ERG [Nematostella vectensis]	yes		yes

## Sheet: peak-calling-4dP
#Chromosome	Start	End	Name	NPeaks	Spread	ChipSE	EnrichSE	P4d04_PZName	P4d04_PZScore	P4d04_PZChip	P4d04_PZInput	P4d04_PZEnrich	P4d04_PZFDR	P4d04_Chip	P4d04_Input	P4d04_Enrich	P4d04_Mapq	P4d09_PZName	P4d09_PZScore	P4d09_PZChip	P4d09_PZInput	P4d09_PZEnrich	P4d09_PZFDR	P4d09_Chip	P4d09_Input	P4d09_Enrich	P4d09_Mapq	P4d11_PZName	P4d11_PZScore	P4d11_PZChip	P4d11_PZInput	P4d11_PZEnrich	P4d11_PZFDR	P4d11_Chip	P4d11_Input	P4d11_Enrich	P4d11_Mapq	Multiple	Exonic	Gene (curated)	Blast Hit	BRE	Remarks	Overlap with enhancers from Schwaiger et al., 2014
scaffold_1	1346421	1346739	scaffold_1_1346580	2	2.42	0.8	9.33	Peak_7943	78.4	4.15	0.4	10.5	19.41	4.71	0.44	10.82	20.35	Peak_7556	111.09	3.74	0.17	22.27	50.3	3.49	0.11	32.69	19.06	NA	NA	NA	NA	NA	NA	1.94	1.71	1.13	17.64	1	0	NVE120			intronic
scaffold_1	678390	678708	scaffold_1_678549	2	2.4	0.65	10.39	Peak_22248	19.42	2.84	0.54	5.23	12.85	3.31	0.68	4.88	58.8	Peak_8276	104.27	3.56	0.1	34.77	49.34	3.37	0.1	34.01	57.24	NA	NA	NA	NA	NA	NA	1.41	1.22	1.15	56.72	1	0	NVE57	endothelin-converting enzyme 1-like [Exaiptasia pallida]		Alternative model NVE56 (Fibrillin-2), in BMP2/4MO padj = 0,000741135715326841, fold change = 3,263
scaffold_1	846235	846553	scaffold_1_846394	3	1.56	0.35	2.57	Peak_13390	85.59	2.18	0.19	11.66	12.36	2.01	0.18	11.27	60	Peak_21190	21.5	2.9	1.18	2.45	13.24	3.14	1.2	2.61	60	Peak_20270	47.94	2.42	0.43	5.62	37.16	2.22	0.43	5.21	60	1	0	NVE69	ribosomal protein L12 [Anthopleura elegantissima]		missing model upstream of NVE69, hits to CDC42 small effector protein 2-like isoform X1 [Orbicella faveolata] _NVE69 discarded as irrelevant
scaffold_100	38986	39304	scaffold_100_39145	3	3.34	1.15	2.6	Peak_22049	58.33	1.84	0.46	3.96	9.39	1.69	0.43	3.91	58.42	Peak_4939	115.39	5.42	0.74	7.3	22.21	5.63	0.85	6.66	58.29	Peak_5794	131.79	4.36	0.35	12.36	53.5	4.21	0.33	12.7	58.09	1	0	NVE424	NADP-dependent oxidoreductase domain-containing protein 1-like [Exaiptasia pallida]	yes
scaffold_101	251152	251470	scaffold_101_251311	2	1.56	0.31	5.92	Peak_16374	74.13	2.03	0.49	4.17	11.14	1.87	0.46	4.05	59.64	Peak_10824	84.87	3.08	0.16	19.35	46.31	2.93	0.15	20.18	60	NA	NA	NA	NA	NA	NA	2.16	1.86	1.16	60	1	0	NVE531	Snaclec 5 [Exaiptasia pallida]
scaffold_101	478922	479240	scaffold_101_479081	3	2.08	0.78	3.5	Peak_9463	111.04	2.59	0.97	2.66	14.16	2.47	0.89	2.77	57.37	Peak_5610	104.61	5.03	0.37	13.58	21.47	5.13	0.38	13.66	56.64	Peak_8929	98.46	3.43	0.95	3.61	48.49	3.39	0.94	3.6	57.67	1	0	NVE558	mitochondrial ubiquitin ligase activator of NFKB 1-like isoform X2 [Orbicella faveolata]
scaffold_102	559104	559422	scaffold_102_559263	3	1.71	0.55	5.64	Peak_8049	124.6	2.81	1.34	2.1	14.84	2.68	1.3	2.06	53.94	Peak_7079	86.56	4.45	1.16	3.82	20.2	4.57	1.26	3.63	53.49	Peak_6832	118.84	3.97	0.21	19.06	51.39	3.91	0.2	19.7	55.81	1	0	NVE644	fibronectin type-III domain-containing protein 3A-like [Exaiptasia pallida]
scaffold_103	191747	192065	scaffold_103_191906	2	1.35	0.28	4.95	Peak_8058	124.52	2.79	0.16	17.64	14.83	2.61	0.15	17.12	4.42	Peak_12686	48.27	3.4	1.15	2.96	16.88	3.51	1.14	3.09	4.5	NA	NA	NA	NA	NA	NA	2.76	1.74	1.58	4.48	1	0	NVE702	PREDICTED: kinesin-like protein KIF22-like [Oreochromis niloticus]		intronic
scaffold_104	13539	13857	scaffold_104_13698	2	3.51	1.71	3.49	Peak_7756	127.72	2.86	0.97	2.93	15.04	2.3	0.84	2.74	17.97	Peak_2671	176.16	7.64	0.63	12.16	25.58	8.06	0.65	12.44	18.44	NA	NA	NA	NA	NA	NA	3.97	3	1.32	16.56	1	0	NVE783	dolichol-phosphate mannosyltransferase subunit 1-like isoform X1 [Exaiptasia pallida]		NVE783 and NVE784 is the same gene (see nemVec1_jgiFilteredModels_estExt_gwp.C_1040009)
scaffold_104	29431	29749	scaffold_104_29590	2	3.17	1.83	5.97	Peak_6200	148.61	3.21	1.29	2.48	15.8	2.9	1.17	2.47	29.88	Peak_2214	196.6	8.44	0.41	20.67	27.41	9.18	0.46	20.12	35.25	NA	NA	NA	NA	NA	NA	5.25	2.71	1.94	28.88	1	0	NVE785	hypothetical protein BRAFLDRAFT_88446 [Branchiostoma floridae]		NVE785 is a wrong model - it's a desert upstream of NVE784/NVE783_discarded
scaffold_107	197891	198209	scaffold_107_198050	3	1.53	0.6	0.86	Peak_4332	184.6	3.85	0.45	8.47	17.09	3.73	0.44	8.49	39.69	Peak_5575	105.12	5.05	0.46	10.93	21.48	5.26	0.56	9.34	47.41	Peak_3256	183.23	5.92	0.92	6.4	60.77	5.72	0.89	6.45	42.28	1	0	NVE1026			gene desert_model discarded
scaffold_107	531235	531553	scaffold_107_531394	3	2.93	1.09	6.76	Peak_17417	70.84	1.99	0.85	2.34	10.75	1.88	0.79	2.38	46.7	Peak_6356	94.87	4.69	0.14	33.58	20.8	5.51	0.23	24.42	47.64	Peak_10210	88.53	3.18	0.58	5.48	47.03	2.84	0.44	6.52	43.08	1	0	NVE1044	Thyroid adenoma-associated protein-like [Stylophora pistillata]		NVE1043 model is wrong - no reads, peak reassigned to NVE1044
scaffold_109	283783	284101	scaffold_109_283942	2	2.52	0.9	2.06	Peak_6501	93.15	4.64	0.42	11.03	20.62	5.04	0.61	8.26	12.55	Peak_10208	88.54	3.19	0.85	3.75	47.03	2.95	0.74	3.99	12.04	NA	NA	NA	NA	NA	NA	2	1.72	1.16	12.81	1	0	NVE1152	short transient receptor potential channel 4-associated protein-like [Exaiptasia pallida]		Alternative target NVE1151 (Fibulin 2) BMP2/4MO padj = 2,37179260753762E-51, fold change = 0,136. NVE1152 is not differentially expressed upon BMP2/4MO
scaffold_11	1160682	1161000	scaffold_11_1160841	3	2.01	1.21	2.57	Peak_3637	203.95	4.21	1.27	3.32	17.64	4.01	1.23	3.25	3.19	Peak_2933	166.37	7.25	0.62	11.7	25.12	8.08	0.74	10.97	4.03	Peak_2284	222.85	7.25	2.22	3.27	64.87	6.94	2.13	3.27	3.37	1	0	NVE1303	PREDICTED: similar to Mitochondrial 2-oxoglutarate/malate carrier protein (OGCP) (Solute carrier family 25 member 11) [Ciona intestinalis]		intronic
scaffold_11	1541523	1541841	scaffold_11_1541682	2	3.78	1.01	10.33	Peak_7619	81.19	4.24	0.14	30.61	19.69	4.7	0.14	33.95	33.74	Peak_13717	70.52	2.77	0.64	4.31	43.23	2.6	0.64	4.08	25.58	NA	NA	NA	NA	NA	NA	1.24	0.64	1.94	28.53	1	0	NVE1338	Disintegrin and metalloproteinase domain-containing protein 9 [Exaiptasia pallida]	yes	intronic
scaffold_11	447706	448024	scaffold_11_447865	3	3.65	1.24	4.93	Peak_28655	42.46	1.7	0.55	3.07	8.2	1.55	0.44	3.49	32.41	Peak_5149	111.83	5.27	0.22	24.07	21.94	5.65	0.32	17.71	26.27	Peak_13607	71.01	2.79	1.21	2.3	43.34	2.52	1.03	2.43	30.9	1	0	NVE1242	monocarboxylate transporter 10-like isoform X2 [Exaiptasia pallida]		intronic
scaffold_110	200849	201167	scaffold_110_201008	2	4.13	2.99	4.4	Peak_5288	164.19	3.48	1.51	2.31	16.37	3.29	1.44	2.29	19.75	Peak_1051	308.42	13.03	0.53	24.8	35.04	13.58	0.89	15.23	23.44	NA	NA	NA	NA	NA	NA	7.41	4.18	1.77	18.63	1	0	NVE1390	hemicentin-1-like [Exaiptasia pallida]		NVE1391 is a miassignment due to a wrong extra exon - reassigned to NVE1390
scaffold_1107	34192	34510	scaffold_1107_34351	2	3.95	1.63	2.07	Peak_2828	170.46	7.4	0.73	10.2	25.26	7.53	0.83	9.06	7.56	Peak_4291	157.02	5.08	0.96	5.28	57.51	4.97	0.92	5.4	10.19	NA	NA	NA	NA	NA	NA	1.91	1.02	1.88	6.59	0	0	NVE1437			wrong model at the end of the scaffold_discarded
scaffold_112	328635	328953	scaffold_112_328794	3	1.82	0.43	4.97	Peak_27252	45.99	1.73	0.78	2.2	8.36	1.62	0.76	2.12	59.79	Peak_25098	14.45	2.74	0.61	4.46	11.93	2.94	0.77	3.82	60	Peak_10532	86.72	3.13	0.17	18.9	46.61	2.89	0.16	17.8	60	1	0	NVE1547	hypothetical protein TRIADDRAFT_56539 [Trichoplax adhaerens]	yes	unclear model_discarded
scaffold_112	532992	533310	scaffold_112_533151	2	3.32	0.75	2.89	Peak_13789	43.42	3.29	0.31	10.58	16.37	3.53	0.35	10.13	55.71	Peak_10402	87.49	3.14	0.24	13.27	46.77	3.01	0.23	12.97	55.49	NA	NA	NA	NA	NA	NA	1.06	0.33	3.23	55.3	1	0	NVE1563	T-complex protein 1 subunit theta-like [Stylophora pistillata]		intronic
scaffold_112	549268	549586	scaffold_112_549427	3	2.1	0.6	3.5	Peak_15336	77.82	2.08	0.87	2.4	11.55	1.9	0.8	2.36	60	Peak_10401	60.26	3.67	1.09	3.37	18.2	3.98	1.14	3.48	60	Peak_10169	88.83	3.18	0.25	12.68	47.07	2.92	0.22	13.37	59.75	1	0	NVE1564			unclear model_discarded	yes
scaffold_115	270558	270876	scaffold_115_270717	2	3.33	1.21	2.18	Peak_4816	117.24	5.48	0.49	11.19	22.34	5.98	0.63	9.5	58.55	Peak_6460	123.09	4.11	1.18	3.49	52.02	3.73	1.15	3.25	57.76	NA	NA	NA	NA	NA	NA	1.79	0.66	2.74	57.36	1	0	NVE1724	PREDICTED: glycine N-acyltransferase-like protein 3-like [Saccoglossus kowalevskii]		intronic
scaffold_117	623667	623985	scaffold_117_623826	2	4.01	1.13	2.76	Peak_6443	93.93	4.67	0.42	11.19	20.7	5.2	0.44	11.77	41.26	Peak_10469	87.11	3.15	1.03	3.06	46.7	2.97	0.9	3.29	40.13	NA	NA	NA	NA	NA	NA	1.3	0.35	3.69	40.72	1	0	NVE1883	PREDICTED: macrophage mannose receptor 1-like [Oreochromis niloticus]
scaffold_118	64097	64415	scaffold_118_64256	2	1.72	0.58	4.58	Peak_3123	220.82	4.52	0.2	22.22	17.82	4.29	0.2	21.63	60	Peak_16741	59.16	2.57	0.41	6.22	40.27	2.49	0.4	6.21	59.9	NA	NA	NA	NA	NA	NA	2.62	0.25	10.67	60	1	0	NVE1907	protein Tob2-like [Exaiptasia pallida]
scaffold_12	115398	115716	scaffold_12_115557	2	1.34	0.21	2.31	Peak_14447	81.31	2.12	0.2	10.39	11.87	2.11	0.2	10.61	8.64	Peak_12692	75.13	2.87	0.81	3.55	44.25	2.83	0.78	3.63	9.65	NA	NA	NA	NA	NA	NA	2.53	0.68	3.73	9.98	1	0	NVE2054	FGFR1 oncogene partner 2 homolog [Exaiptasia pallida]	yes	intronic
scaffold_12	975129	975447	scaffold_12_975288	2	4.44	3.99	4.74	Peak_720	382.54	16.79	1.03	16.31	39.03	17.78	1.08	16.42	49.24	Peak_1164	319.3	10.47	3.82	2.74	70.97	10.14	3.7	2.74	46.96	NA	NA	NA	NA	NA	NA	4	2.35	1.7	44.25	1	0	NVE2141	A007-G11 G-protein coupled receptor [Acropora millepora]		peak in a gene desert
scaffold_123	129249	129567	scaffold_123_129408	2	2.62	0.86	3.13	Peak_24393	52.73	1.78	0.37	4.87	8.91	1.64	0.35	4.69	59.63	Peak_7710	80.31	4.21	0.29	14.62	19.65	4.3	0.28	15.33	59.89	NA	NA	NA	NA	NA	NA	1.83	0.16	11.79	60	1	0	NVE2417	bone morphogenetic protein 1-like isoform X2 [Exaiptasia pallida]			yes
scaffold_126	310061	310379	scaffold_126_310220	3	1.09	0.11	2.41	Peak_2909	228.66	4.66	0.9	5.16	17.94	4.19	0.85	4.91	59.17	Peak_9964	62.8	3.72	0.69	5.36	18.43	4.15	0.68	6.13	59.77	Peak_6345	124.41	4.13	0.38	10.99	52.22	3.83	0.3	12.68	59.19	1	0	NVE2617	32,5-bisphosphate nucleotidase 1 [Lepeophtheirus salmonis]		Alternative target NVE2618 (L-asparaginase)	yes
scaffold_128	379343	379661	scaffold_128_379502	2	3.87	1.08	9.99	Peak_6832	89.05	4.5	0.14	31.41	20.37	4.97	0.15	33.4	15.26	Peak_15042	65.25	2.67	0.7	3.84	41.87	2.49	0.64	3.93	12.37	NA	NA	NA	NA	NA	NA	1.28	0.44	2.93	11.6	1	0	NVE2776	PREDICTED: TATA-binding protein-associated factor 172 [Monodelphis domestica]		intronic
scaffold_129	166902	167220	scaffold_129_167061	2	1.9	0.44	2.59	Peak_12392	90.42	2.26	0.21	10.88	12.84	2.1	0.2	10.53	60	Peak_9253	95.72	3.35	0.33	10.07	48.1	3.16	0.33	9.61	60	NA	NA	NA	NA	NA	NA	1.66	0.71	2.34	60	1	0	NVE2832	dorsal-ventral patterning tolloid-like protein 1 isoform X1 [Exaiptasia pallida]			yes
scaffold_129	33194	33512	scaffold_129_33353	2	1.81	0.51	1.56	Peak_15347	77.78	2.07	0.27	7.69	11.54	1.89	0.27	7.12	54.29	Peak_7363	113.04	3.8	0.35	10.91	50.59	3.43	0.28	12.31	51.27	NA	NA	NA	NA	NA	NA	1.9	0.22	8.44	52.17	1	0	NVE2817	zinc finger and SCAN domain-containing protein 29-like [Exaiptasia pallida]
scaffold_12901	116	434	scaffold_12901_275	2	2.97	1.07	11.19	Peak_5427	107.3	5.12	0.15	34.86	21.58	5.5	0.15	36.16	59.61	Peak_9657	92.44	3.28	0.84	3.91	47.6	3.09	0.84	3.68	59.59	NA	NA	NA	NA	NA	NA	1.85	1.14	1.63	58.75	0	0	NVE2882	hypothetical protein BRAFLDRAFT_128896 [Branchiostoma floridae]		bad model on a tiny scaffold_discarded
scaffold_130	524722	525040	scaffold_130_524881	2	1.28	0.19	4.56	Peak_8391	121.21	2.75	0.8	3.43	14.65	2.55	0.7	3.64	60	Peak_9784	91.63	3.24	0.22	15.02	47.45	2.99	0.18	16.39	59.64	NA	NA	NA	NA	NA	NA	2.34	1.22	1.92	60	1	0	NVE3152	complement C1q subcomponent subunit C-like isoform X2 [Exaiptasia pallida]			yes
scaffold_132	574322	574640	scaffold_132_574481	2	2.34	0.87	3.64	Peak_5684	103.6	4.99	0.3	16.77	21.36	5.29	0.42	12.46	2.49	Peak_7474	111.88	3.81	1.89	2.02	50.43	3.68	1.78	2.07	1.22	NA	NA	NA	NA	NA	NA	2.26	2.08	1.09	1.44	1	0	NVE3300	patatin-like phospholipase domain-containing protein 7 isoform X3 [Exaiptasia pallida]		intronic
scaffold_133	465488	465806	scaffold_133_465647	2	5.56	1.3	8.39	Peak_5083	112.72	5.31	0.2	26.29	22.03	5.47	0.2	26.74	10.33	Peak_12769	74.84	2.87	1.28	2.25	44.17	2.73	1.26	2.17	5.13	NA	NA	NA	NA	NA	NA	0.98	0.96	1.02	7.06	1	0	NVE3363	uncharacterized protein C6orf62 homolog [Exaiptasia pallida]
scaffold_134	460655	460973	scaffold_134_460814	3	2.38	0.85	1.88	Peak_13550	84.95	2.18	0.5	4.33	12.28	2.08	0.49	4.26	43.59	Peak_6500	93.15	4.64	0.34	13.85	20.63	4.95	0.49	10.18	41.15	Peak_11570	80.87	2.99	0.63	4.71	45.49	2.89	0.59	4.88	45.85	1	0	NVE3420	hypothetical protein BRAFLDRAFT_72851 [Branchiostoma floridae]		gene desert, likely misassembled model _ discarded
scaffold_134	89178	89496	scaffold_134_89337	3	2.51	0.83	2.03	Peak_15418	77.52	2.08	0.98	2.12	11.51	1.88	0.87	2.17	28	Peak_7267	84.69	4.36	0.34	12.77	20.03	4.72	0.53	8.93	31.74	Peak_7269	113.93	3.83	0.5	7.61	50.79	3.59	0.5	7.25	27.67	1	0	NVE3396			wrong model_discarded
scaffold_137	278147	278465	scaffold_137_278306	3	1.15	0.21	2.82	Peak_3052	223.15	4.57	1.05	4.36	17.93	4.36	0.95	4.58	59.88	Peak_5728	103.01	4.98	0.32	15.66	21.32	4.98	0.36	13.93	60	Peak_5551	135.48	4.47	0.66	6.78	54.12	4.33	0.64	6.82	59.39	1	0	NVE3572	SMAD4 [Nematostella vectensis]			yes
scaffold_137	279041	279359	scaffold_137_279200	3	2.12	1.13	3.48	Peak_4377	183.38	3.83	0.45	8.48	17.02	3.48	0.43	8.13	59.93	Peak_3558	146.51	6.48	0.41	15.64	23.78	7.37	0.4	18.28	59.98	Peak_3962	164.53	5.3	0.36	14.55	58.46	4.96	0.26	18.81	59.81	1	0	NVE3572	SMAD4 [Nematostella vectensis]			yes
scaffold_139	554511	554829	scaffold_139_554670	2	5.25	1.4	3.4	Peak_4648	120.49	5.59	0.36	15.61	22.4	5.94	0.48	12.49	33.6	Peak_10085	89.49	3.21	0.91	3.53	47.11	2.91	0.87	3.35	29.83	NA	NA	NA	NA	NA	NA	1.13	0.76	1.5	27.15	1	0	NVE3754	multiple coagulation factor deficiency protein 2 homolog [Exaiptasia pallida]		intronic
scaffold_145	323905	324223	scaffold_145_324064	2	3.05	1.72	4.1	Peak_2575	180.33	7.79	0.58	13.41	25.92	8.75	0.6	14.61	1.37	Peak_4148	160.02	5.19	1.33	3.9	57.96	4.99	1.27	3.93	0.84	NA	NA	NA	NA	NA	NA	2.87	2.53	1.14	0.91	1	0	NVE4307	lamin-L(I)-like [Exaiptasia pallida]
scaffold_145	52585	52903	scaffold_145_52744	3	1.37	0.24	2.01	Peak_13825	83.7	2.16	0.18	11.89	12.18	2.06	0.18	11.55	31.68	Peak_24614	15.21	2.75	0.38	7.22	12.07	2.82	0.42	6.8	32.35	Peak_13244	72.72	2.81	0.59	4.74	43.66	2.72	0.57	4.76	28.95	1	0	NVE4284
scaffold_146	348023	348341	scaffold_146_348182	2	4.77	1.03	3.01	Peak_7004	87.38	4.45	0.41	10.74	20.25	4.53	0.42	10.69	11.12	Peak_14019	69.27	2.76	1.24	2.23	42.9	2.73	1.19	2.29	7.82	NA	NA	NA	NA	NA	NA	0.95	0.82	1.16	8.74	1	0	NVE4371	PREDICTED: similar to Protein Shroom4 [Hydra magnipapillata]		intronic
scaffold_148	359462	359780	scaffold_148_359621	2	5.04	1.09	2.22	Peak_6748	90.06	4.54	0.44	10.21	20.42	4.73	0.55	8.57	9.3	Peak_11188	82.77	3.05	1.12	2.71	45.89	2.92	1.05	2.78	6.43	NA	NA	NA	NA	NA	NA	0.94	0.72	1.3	8.72	1	0	NVE4509	zinc metalloproteinase-disintegrin-like BjussuMP-1 [Exaiptasia pallida]		intronic
scaffold_148	360266	360584	scaffold_148_360425	2	4.68	1.05	2.67	Peak_6502	93.12	4.64	0.45	10.25	20.64	4.59	0.46	10.05	27.07	Peak_20879	46.26	2.41	0.92	2.61	36.68	2.42	0.92	2.64	29.6	NA	NA	NA	NA	NA	NA	0.98	0.62	1.57	32.36	1	0	NVE4509	zinc metalloproteinase-disintegrin-like BjussuMP-1 [Exaiptasia pallida]		intronic
scaffold_15	1621758	1622076	scaffold_15_1621917	3	1.47	0.38	4.08	Peak_7935	125.6	2.82	0.84	3.37	14.95	2.56	0.81	3.17	59.97	Peak_13838	43.23	3.29	0.67	4.9	16.34	3.63	0.7	5.21	60	Peak_6592	121.61	4.05	0.25	16.45	51.78	3.75	0.23	16.3	60	1	0	NVE4746	ring finger protein 213-like		intronic
scaffold_150	248521	248839	scaffold_150_248680	3	3.82	2.14	3.37	Peak_8638	118.68	2.71	1.16	2.33	14.48	2.62	1.07	2.44	3.71	Peak_1890	214.42	9.17	0.78	11.81	29.24	10	0.81	12.38	4.25	Peak_2398	217	7.09	3.32	2.13	64.36	6.84	3.24	2.11	3.88	1	0	NVE4771	116 kDa U5 small nuclear ribonucleoprotein component-like [Stylophora pistillata]		intronic
scaffold_151	398844	399162	scaffold_151_399003	3	2.02	0.83	2.25	Peak_9208	113.24	2.74	1.02	2.68	14.24	2.71	1.04	2.61	47.29	Peak_5285	109.39	5.26	0.51	10.36	21.8	5.45	0.54	10.12	46.53	Peak_22635	41.26	3.35	0.4	8.32	35.45	3.3	0.41	8.13	48.09	1	0	NVE4852	protein BUD31 homolog [Exaiptasia pallida]
scaffold_151	88191	88509	scaffold_151_88350	2	1.53	0.34	3.13	Peak_26849	12.09	2.69	0.89	3.04	11.43	2.94	0.9	3.28	60	Peak_9873	91.07	3.23	0.3	10.93	47.32	2.97	0.26	11.43	60	NA	NA	NA	NA	NA	NA	1.94	1.65	1.18	59.78	1	0	NVE4825	polyketide synthase PksE [Clostridium acetobutylicum DSM 1731]
scaffold_153	436087	436405	scaffold_153_436246	2	2.54	1.28	3.82	Peak_7235	134.05	2.95	0.7	4.22	15.33	2.85	0.69	4.11	12.81	Peak_3304	153.67	6.73	0.48	14.07	24.17	7.24	0.51	14.14	15.45	NA	NA	NA	NA	NA	NA	5.71	3.43	1.66	11.67	1	0	NVE4973	WD repeat-containing protein 11-like [Orbicella faveolata]		intronic
scaffold_154	351735	352053	scaffold_154_351894	3	1.44	0.51	5.32	Peak_2189	265.68	5.39	1.01	5.33	17.8	5	0.99	5.06	59.93	Peak_17604	30.32	3.04	0.14	21.1	14.59	3.5	0.15	23.5	59.72	Peak_3635	172.47	5.57	0.39	14.42	59.49	5.04	0.36	14.03	59.77	1	0	NVE5022	netrin1		intronic	yes
scaffold_154	352124	352442	scaffold_154_352283	3	1.61	1.38	0.87	Peak_1040	375.24	7.56	0.42	18	20.79	7.31	0.4	18.12	59.94	Peak_1380	258.11	11.15	0.62	17.99	32.29	11.79	0.66	17.94	60	Peak_962	352.8	11.41	0.53	21.43	72.57	11	0.53	20.63	59.88	1	0	NVE5022	netrin1	yes	intronic	yes
scaffold_154	353868	354186	scaffold_154_354027	3	1.73	0.52	4.35	Peak_9000	115.15	2.65	0.98	2.7	14.34	2.43	0.97	2.51	59.98	Peak_9900	63.23	3.73	0.77	4.86	18.45	4.21	0.97	4.35	59.58	Peak_7359	113.07	3.8	0.23	16.83	50.6	3.52	0.21	16.39	60	1	0	NVE5022	netrin1		intronic	yes
scaffold_155	146714	147032	scaffold_155_146873	2	3.97	1.2	2.72	Peak_5663	103.9	5.01	0.43	11.64	21.39	5.57	0.56	9.96	14.97	Peak_8527	102.08	3.53	1.17	3.02	48.95	3.31	1.15	2.89	16.51	NA	NA	NA	NA	NA	NA	1.4	1.36	1.03	16.39	1	0	NVE5059	scalloped [Thermobia domestica]		intronic
scaffold_155	497623	497941	scaffold_155_497782	3	4.05	2.6	3.76	Peak_7140	135.38	2.99	1.4	2.15	15.34	2.94	1.34	2.19	6.17	Peak_1283	269.33	11.59	0.78	14.94	33.21	11.91	0.84	14.19	9.42	Peak_2542	209.71	6.82	1.84	3.71	63.73	6.57	1.73	3.8	8.15	1	0	NVE5080	EGF and laminin G domain-containing protein-like [Exaiptasia pallida]		intronic
scaffold_157	402036	402354	scaffold_157_402195	2	2.54	0.94	3.78	Peak_6073	98.48	4.82	0.35	13.58	21.02	5.04	0.38	13.22	32.84	Peak_14915	65.82	2.68	0.21	12.89	41.98	2.51	0.2	12.63	42.33	NA	NA	NA	NA	NA	NA	1.99	1.25	1.59	42	1	0	NVE5217	Cathepsin L1 [Stylophora pistillata]		intronic	yes
scaffold_16	1143396	1143714	scaffold_16_1143555	3	1.38	0.49	8.93	Peak_3215	217	4.48	1.88	2.38	17.9	4.21	1.83	2.3	60	Peak_4696	119.41	5.56	0.6	9.34	22.38	5.82	0.61	9.48	60	Peak_3490	177.19	5.7	0.21	27.01	59.87	5.42	0.17	31.96	59.88	1	0	NVE5479	SMAD1/5	yes
scaffold_16	540599	540917	scaffold_16_540758	3	2.88	1.25	14.45	Peak_9768	108.27	2.54	1	2.54	14.04	2.26	0.96	2.36	10.83	Peak_3738	142.02	6.3	0.14	45.55	23.54	6.51	0.14	47.04	7.7	Peak_6905	117.89	3.96	0.8	4.97	51.29	3.67	0.71	5.16	10.19	1	0	NVE5426	guanylate cyclase soluble subunit beta-1-like [Exaiptasia pallida]		intronic
scaffold_162	157957	158275	scaffold_162_158116	2	3.96	1.16	2.19	Peak_5841	101.34	4.92	0.46	10.79	21.27	5.25	0.54	9.71	53.7	Peak_14352	67.9	2.73	0.85	3.19	42.56	2.53	0.82	3.09	44.88	NA	NA	NA	NA	NA	NA	1.33	0.41	3.2	46.98	1	0	NVE5651	serine/threonine-protein kinase Kist-like, partial [Exaiptasia pallida]		intronic
scaffold_164	210548	210866	scaffold_164_210707	2	3.55	0.89	2.7	Peak_9067	68.71	3.87	0.57	6.79	18.85	4.3	0.6	7.16	60	Peak_10850	84.74	3.08	0.29	10.46	46.27	2.89	0.26	11.21	60	NA	NA	NA	NA	NA	NA	1.21	0.65	1.87	60	1	0	NVE5782	Meis	yes	intronic
scaffold_1643	20511	20829	scaffold_1643_20670	2	4.19	1.43	2.71	Peak_4159	131.21	5.96	0.51	11.63	22.91	6.12	0.64	9.55	25.27	Peak_3672	171.52	5.59	2.19	2.56	59.37	5.24	2.06	2.54	26.54	NA	NA	NA	NA	NA	NA	1.46	2.32	0.63	26.43	1	0	NVE5812	alpha-L-fucosidase 1-like [Exaiptasia pallida]		intronic
scaffold_168	153042	153360	scaffold_168_153201	3	2.83	0.9	2.8	Peak_26321	48.21	1.74	0.16	10.98	8.54	1.67	0.15	10.79	22.44	Peak_7237	85.04	4.37	0.41	10.7	20.09	4.74	0.39	12.1	21.86	Peak_12947	74.03	2.85	0.89	3.2	43.99	2.75	0.88	3.11	20.97	1	0	NVE5998	Arp6
scaffold_169	327666	327984	scaffold_169_327825	2	5.12	1.05	3.7	Peak_7447	82.83	4.29	0.2	21.64	19.89	4.53	0.29	15.56	17.05	Peak_11911	79.05	2.95	0.65	4.56	45.06	2.79	0.64	4.34	22.29	NA	NA	NA	NA	NA	NA	0.88	0.19	4.56	20.22	1	0	NVE6069			misassembled region, NVE6069 is clearly a wrong assignment, correct one is probably NVE6072_discarded
scaffold_17	454143	454461	scaffold_17_454302	3	2.2	1.21	6.57	Peak_5490	160.55	3.4	0.36	9.35	16.09	3.15	0.36	8.81	15.13	Peak_3957	136.12	6.16	0.96	6.41	23.15	6.62	1.1	5.99	4.96	Peak_2191	228.28	7.34	0.27	27.21	65.22	6.94	0.26	26.97	12.26	1	0	NVE6154	Pikachurin-like	yes
scaffold_1717	10951	11269	scaffold_1717_11110	3	4.36	1.93	18.44	Peak_14704	80.19	2.11	0.53	3.99	11.77	1.96	0.52	3.78	37.79	Peak_2576	180.32	7.78	0.14	55.15	25.91	8.55	0.14	59.16	36.37	Peak_5042	143.22	4.69	1.19	3.93	55.39	4.36	1.12	3.91	36.35	0	0	NVE6358		yes	wrong model, tiny scaffold_discarded
scaffold_173	139611	139929	scaffold_173_139770	3	1.53	0.67	4.28	Peak_3146	219.97	4.53	1.3	3.48	17.82	4.33	1.23	3.53	18.47	Peak_4221	129.68	5.93	1.34	4.43	22.85	6.63	1.44	4.61	17.18	Peak_3472	177.65	5.72	0.35	16.52	59.92	5.57	0.33	16.88	19.16	1	0	NVE6445
scaffold_175	100379	100697	scaffold_175_100538	2	3.89	1.79	2.36	Peak_2582	180.12	7.79	0.73	10.62	25.89	8.33	0.9	9.27	0.33	Peak_4436	154.27	5.01	1.45	3.46	57.07	4.78	1.32	3.62	0.27	NA	NA	NA	NA	NA	NA	2.14	1.62	1.33	3.87	1	0	NVE6555	PREDICTED: serine/threonine-protein kinase 31 [Ornithorhynchus anatinus]		intronic
scaffold_175	367525	367843	scaffold_175_367684	2	3.9	1.14	6	Peak_5678	103.7	5	0.24	21.2	21.38	5.33	0.24	22.64	21.29	Peak_8361	103.57	3.57	1.14	3.12	49.18	3.39	1.05	3.22	18.6	NA	NA	NA	NA	NA	NA	1.37	0.21	6.54	30.92	1	0	NVE6574	lysosomal Pro-X carboxypeptidase-like [Exaiptasia pallida]
scaffold_181	13538	13856	scaffold_181_13697	2	2.11	0.84	2.81	Peak_7766	127.67	2.84	0.25	11.6	15.03	2.61	0.25	10.54	12.14	Peak_5888	100.95	4.97	2.07	2.39	21.19	5.5	2.35	2.34	8.78	NA	NA	NA	NA	NA	NA	4.15	2.16	1.92	9.03	1	0	NVE7015	ephrin type-A receptor 4a [Capsaspora owczarzaki ATCC 30864]
scaffold_183	180856	181174	scaffold_183_181015	3	1.78	0.69	3.26	Peak_6106	150.06	3.23	1.04	3.1	15.84	3.02	1	3	60	Peak_5899	100.76	4.89	0.36	13.44	21.18	5.38	0.38	14.19	60	Peak_6387	123.87	4.12	0.58	7.1	52.14	3.9	0.53	7.31	60	1	0	NVE7116	OtxB [Nematostella vectensis]	yes	intronic	yes
scaffold_183	182083	182401	scaffold_183_182242	2	1.88	0.59	4.36	Peak_14655	80.45	2.11	0.17	12.05	11.8	2.02	0.17	11.76	59.83	Peak_11069	56.7	3.57	0.95	3.75	17.77	3.78	1.09	3.47	60	NA	NA	NA	NA	NA	NA	2.02	0.11	18.54	59.98	1	0	NVE7116	OtxB [Nematostella vectensis]		intronic	yes
scaffold_187	311348	311666	scaffold_187_311507	2	7.66	1.64	2.39	Peak_4009	134.74	6.09	0.51	12.02	23.11	6.52	0.54	12.03	42.84	Peak_8305	104.07	3.57	0.9	3.95	49.29	3.5	0.88	4	41.83	NA	NA	NA	NA	NA	NA	0.85	0.14	6.22	42.43	1	0	NVE7308	Transcription factor E2F4 [Exaiptasia pallida]
scaffold_19	1376852	1377170	scaffold_19_1377011	3	2.45	0.79	0.74	Peak_15384	77.67	2.07	0.34	6.15	11.53	1.9	0.33	5.77	59.92	Peak_7706	80.33	4.22	0.41	10.2	19.66	4.65	0.61	7.64	60	Peak_9109	96.93	3.39	0.65	5.18	48.22	3.2	0.62	5.18	59.24	1	0	NVE7540	3' peak of the connector enhancer of kinase suppressor of ras 2-like [Exaiptasia pallida]	yes
scaffold_191	84471	84789	scaffold_191_84630	3	1.68	0.45	3.95	Peak_11010	98.7	2.39	0.58	4.09	13.42	2.22	0.48	4.59	60	Peak_10560	59.45	3.65	0.95	3.84	18.1	3.74	1.06	3.52	60	Peak_8244	104.54	3.57	0.25	14.32	49.39	3.23	0.2	15.88	60	1	0	NVE7601	CCR4-NOT transcription complex subunit 3-like [Orbicella faveolata]			yes
scaffold_195	124709	125027	scaffold_195_124868	2	2.93	1.03	5.03	Peak_17434	70.79	1.99	0.59	3.39	10.74	1.8	0.41	4.35	41.39	Peak_6515	92.97	4.63	0.17	26.62	20.62	5.27	0.3	17.83	44.79	NA	NA	NA	NA	NA	NA	4.18	2.72	1.54	42.38	1	0	NVE7760
scaffold_195	45626	45944	scaffold_195_45785	2	5.29	2.11	3.16	Peak_2354	189.23	8.14	0.63	12.84	26.78	8.83	0.73	12.16	38.67	Peak_5925	129.87	4.32	1.18	3.67	53.2	4.07	1.15	3.54	32.98	NA	NA	NA	NA	NA	NA	1.67	0.83	2	31.22	1	0	NVE7759	probable extracellular nuclease [Ectocarpus siliculosus]		desert, model irrelevant_discarded
scaffold_195	75476	75794	scaffold_195_75635	2	4.87	1.47	2.89	Peak_4421	125.37	5.76	0.52	10.98	22.66	6.31	0.61	10.39	38.27	Peak_4570	151.63	4.95	1.62	3.05	56.67	4.62	1.56	2.96	36.93	NA	NA	NA	NA	NA	NA	1.3	1.46	0.89	33.5	1	0	NVE7759	probable extracellular nuclease [Ectocarpus siliculosus]		desert, model irrelevant_discarded
scaffold_196	382744	383062	scaffold_196_382903	2	3.67	1.26	4.19	Peak_4778	118.12	5.51	0.42	13.14	22.33	5.95	0.41	14.41	24.38	Peak_5339	138.47	4.56	1.38	3.3	54.7	4.36	1.28	3.42	19.41	NA	NA	NA	NA	NA	NA	1.62	2.32	0.7	22.32	1	0	NVE7831
scaffold_198	346372	346690	scaffold_198_346531	2	2.54	1.1	4.06	Peak_4601	121.42	5.62	0.38	14.79	22.48	6.24	0.42	15.01	59.89	Peak_6386	123.88	4.11	0.35	11.7	52.14	3.93	0.32	12.35	60	NA	NA	NA	NA	NA	NA	2.46	1.43	1.72	60	1	0	NVE7915	monocarboxylate transporter 10-like [Exaiptasia pallida]			yes
scaffold_2	1310490	1310808	scaffold_2_1310649	2	1.59	0.35	5.82	Peak_25166	14.36	2.73	0.41	6.71	11.91	3.08	0.48	6.47	60	Peak_11053	83.49	3.04	0.17	18.33	46.05	2.81	0.14	20.75	60	NA	NA	NA	NA	NA	NA	1.93	1.5	1.29	60	1	0	NVE8104	major facilitator superfamily domain-containing protein 8-like [Orbicella faveolata]
scaffold_2	2226300	2226618	scaffold_2_2226459	2	3.56	1.25	2.14	Peak_5151	111.8	5.28	0.28	18.53	21.93	5.96	0.37	16.08	60	Peak_7671	109.79	3.71	0.25	15.08	50.2	3.35	0.25	13.67	60	NA	NA	NA	NA	NA	NA	1.68	0.19	8.81	60	1	0	NVE8198		yes	wrong model, directly upstream of GATA (NVE8199)	yes
scaffold_2	2228508	2228826	scaffold_2_2228667	2	2.66	0.72	1.45	Peak_14475	81.15	2.12	0.21	10.3	11.86	1.98	0.2	9.93	60	Peak_11982	51.83	3.46	0.62	5.58	17.29	3.8	0.64	5.91	60	NA	NA	NA	NA	NA	NA	1.43	0.27	5.32	59.81	1	0	NVE8198		yes	wrong model, directly upstream of GATA (NVE8199)
scaffold_2	2244822	2245140	scaffold_2_2244981	3	2.4	0.76	2.18	Peak_16294	74.46	2.03	0.48	4.23	11.16	1.85	0.47	3.93	60	Peak_8555	72.65	3.99	0.71	5.63	19.16	4.45	0.75	5.96	60	Peak_7448	112.2	3.78	0.34	11.23	50.45	3.5	0.31	11.25	60	1	0	NVE8199	GATA	yes		yes
scaffold_2	2246714	2247032	scaffold_2_2246873	2	2.38	0.95	9.56	Peak_5959	100.07	4.86	0.14	33.63	21.09	5.5	0.15	36.13	60	Peak_4267	157.49	5.08	0.41	12.38	57.57	4.64	0.4	11.6	60	NA	NA	NA	NA	NA	NA	2.31	0.5	4.59	60	1	0	NVE8199	GATA
scaffold_2	2252736	2253054	scaffold_2_2252895	3	2.18	1	3.74	Peak_6324	146.76	3.17	0.56	5.64	15.76	2.91	0.48	6.12	60	Peak_4301	127.97	5.85	0.26	22.71	22.71	6.36	0.34	18.75	60	Peak_4832	146.9	4.78	0.47	10.26	55.93	4.47	0.45	9.93	60	1	0	NVE8199	GATA	yes		yes
scaffold_2	2588734	2589052	scaffold_2_2588893	2	3.56	1.5	2.68	Peak_3052	161.61	7.07	1	7.07	24.92	7.19	1.02	7.04	6.96	Peak_5615	134.39	4.44	0.42	10.67	53.96	4.33	0.4	10.75	6.8	NA	NA	NA	NA	NA	NA	2.02	1.33	1.52	8.25	1	0	NVE8239	dynein heavy chain 3, axonemal-like [Orbicella faveolata]		intronic
scaffold_201	118054	118372	scaffold_201_118213	3	1.3	0.29	6.65	Peak_5527	159.95	3.4	0.96	3.56	16.07	3.21	0.94	3.4	59.85	Peak_9804	63.85	3.74	0.57	6.58	18.46	3.98	0.67	5.92	60	Peak_5635	134.01	4.42	0.17	25.97	53.91	4.16	0.17	24.49	59.99	1	0	NVE8464	Hl1 [Nematostella vectensis]			yes
scaffold_21	1536647	1536965	scaffold_21_1536806	2	4.97	1.28	3.61	Peak_6149	97.47	4.79	0.43	11.05	20.95	5.44	0.43	12.77	5.55	Peak_13299	72.43	2.81	0.81	3.45	43.61	2.51	0.7	3.57	3.74	NA	NA	NA	NA	NA	NA	1.1	1.33	0.83	7.77	1	0	NVE8939	Monocarboxylate transporter 8 [Stylophora pistillata]	yes
scaffold_21	294795	295113	scaffold_21_294954	2	3.07	1.32	5.6	Peak_3787	140.75	6.27	0.21	29.94	23.46	6.73	0.33	20.36	46.23	Peak_4106	161.08	5.22	1.06	4.91	58.07	4.91	0.97	5.08	48.94	NA	NA	NA	NA	NA	NA	2.19	0.93	2.35	49.04	1	0	NVE8844	PREDICTED: similar to LOC495415 protein [Hydra magnipapillata]		wrong model_discarded
scaffold_210	99961	100279	scaffold_210_100120	3	2.01	0.51	3.47	Peak_23812	54.13	1.8	0.61	2.93	9	1.67	0.52	3.21	59.99	Peak_16722	32.89	3.09	0.28	11.16	14.99	3.37	0.27	12.45	60	Peak_10144	89.04	3.18	0.24	13.48	47.08	2.95	0.2	14.49	60	1	0	NVE8960		yes	wrong model_discarded
scaffold_211	411375	411693	scaffold_211_411534	2	3.7	0.98	3.85	Peak_7746	80.04	4.2	0.26	16.21	19.62	4.64	0.29	16.19	19.98	Peak_10267	88.29	3.17	0.6	5.31	46.94	3.05	0.53	5.77	22.56	NA	NA	NA	NA	NA	NA	1.26	0.33	3.79	18.13	1	0	NVE9036	probable ATP-dependent RNA helicase DDX10 [Stylophora pistillata]
scaffold_216	274033	274351	scaffold_216_274192	2	4.99	1.22	7.69	Peak_6632	91.55	4.58	0.18	25.18	20.53	5.16	0.2	26.25	51.89	Peak_22577	41.43	2.35	0.83	2.82	35.47	2.23	0.83	2.7	51.72	NA	NA	NA	NA	NA	NA	1.03	0.28	3.7	52.52	1	0	NVE9239	RNA-binding protein 41-like [Exaiptasia pallida]	yes	possibly, wrong model
scaffold_22	210946	211264	scaffold_22_211105	2	3.2	0.91	4.36	Peak_8474	73.34	4.01	0.46	8.69	19.21	4.53	0.57	7.93	60	Peak_7436	112.3	3.78	0.23	16.15	50.48	3.49	0.22	15.97	60	NA	NA	NA	NA	NA	NA	1.42	1.59	0.89	59.94	1	0	NVE9411	chromatin accessibility complex protein 1-like [Exaiptasia pallida]		Alternative target NVE9412, ras-like protein 1
scaffold_22	579804	580122	scaffold_22_579963	2	2.66	0.98	3.05	Peak_5748	102.79	4.97	0.49	10.14	21.29	5.21	0.58	9	32.99	Peak_5227	140.11	4.58	0.4	11.34	54.99	4.4	0.39	11.22	37.77	NA	NA	NA	NA	NA	NA	1.96	1.68	1.16	42.82	1	0	NVE9445	Fibrillin-2 [Stylophora pistillata]
scaffold_221	275501	275819	scaffold_221_275660	2	3.78	1.2	2.92	Peak_5808	101.89	4.94	0.48	10.4	21.31	5.67	0.53	10.73	14.33	Peak_7340	113.24	3.81	0.46	8.33	50.64	3.53	0.43	8.12	19.31	NA	NA	NA	NA	NA	NA	1.5	1.56	0.96	18.26	1	0	NVE9584	PREDICTED: formin-2-like [Oreochromis niloticus]		intronic
scaffold_221	275917	276235	scaffold_221_276076	2	2.28	0.67	2.64	Peak_10009	62.54	3.71	0.42	8.91	18.42	4.15	0.43	9.72	19.43	Peak_10687	85.73	3.11	0.29	10.69	46.43	2.92	0.28	10.48	19.98	NA	NA	NA	NA	NA	NA	1.82	0.83	2.2	22.04	1	0	NVE9584	PREDICTED: formin-2-like [Oreochromis niloticus]		intronic
scaffold_222	195481	195799	scaffold_222_195640	2	5.94	0.64	4.52	Peak_11738	94.15	2.31	0.15	15.7	13.12	2.25	0.14	15.59	22.26	Peak_21130	45.56	2.39	0.59	4.04	36.49	2.35	0.59	3.96	21.7	NA	NA	NA	NA	NA	NA	0.4	0.57	0.69	20.79	1	0	NVE9610	vacuolar protein sorting-associated protein 13A-like, partial [Exaiptasia pallida]		intronic
scaffold_222	385008	385326	scaffold_222_385167	2	3.63	1.28	2.87	Peak_4338	127.19	5.83	0.56	10.4	22.72	6.08	0.56	10.9	14.37	Peak_5066	142.91	4.68	1.13	4.15	55.33	4.33	1.08	3.99	12.96	NA	NA	NA	NA	NA	NA	1.68	1.35	1.24	13.66	1	0	NVE9620			likely misassembled model _ discarded target
scaffold_225	19655	19973	scaffold_225_19814	2	2.24	0.58	7.5	Peak_14289	41.32	3.24	0.14	23.43	16.16	3.49	0.14	25.22	60	Peak_10561	86.53	3.12	0.11	27.36	46.59	2.95	0.11	26.34	60	NA	NA	NA	NA	NA	NA	1.56	0.47	3.3	60	1	0	NVE9693	Protein jagged-1 [Exaiptasia pallida]		intronic
scaffold_23	553819	554137	scaffold_23_553978	2	2.67	0.79	3.46	Peak_11518	54.18	3.51	0.49	7.12	17.56	4.12	0.49	8.49	46.25	Peak_7295	113.56	3.82	0.3	12.55	50.75	3.58	0.26	13.59	45.79	NA	NA	NA	NA	NA	NA	1.54	0.94	1.65	49.61	1	0	NVE9918	unknown
scaffold_232	38415	38733	scaffold_232_38574	2	2.54	1.62	4.57	Peak_4916	171.08	3.6	0.83	4.35	16.51	3.41	0.7	4.85	17.89	Peak_2534	181.94	7.84	0.45	17.51	26.04	8.64	0.51	16.82	13.64	NA	NA	NA	NA	NA	NA	4.25	2.29	1.86	19.01	1	0	NVE10069	fibrocystin-L-like isoform X1 [Orbicella faveolata]
scaffold_232	39120	39438	scaffold_232_39279	2	2.37	1.72	1.64	Peak_1977	209.06	8.94	0.79	11.37	28.6	9.74	1.34	7.25	21.21	Peak_3567	174.83	5.68	1.87	3.04	59.68	5.27	1.7	3.1	24.66	NA	NA	NA	NA	NA	NA	4.11	2.26	1.82	23.59	1	0	NVE10069	fibrocystin-L-like isoform X1 [Orbicella faveolata]
scaffold_233	278219	278537	scaffold_233_278378	2	3.91	1.13	3.43	Peak_6267	95.89	4.74	0.39	12.11	20.86	5.24	0.42	12.44	2.87	Peak_8886	98.84	3.44	1.08	3.19	48.53	3.25	0.98	3.3	2.08	NA	NA	NA	NA	NA	NA	1.34	1.03	1.29	6.48	1	0	NVE10119			intronic
scaffold_236	104679	104997	scaffold_236_104838	2	1.96	0.47	4.33	Peak_21111	21.65	2.88	0.19	15.29	13.27	3.07	0.19	15.97	13.52	Peak_9832	91.34	3.23	0.26	12.37	47.39	2.84	0.24	11.8	20.15	NA	NA	NA	NA	NA	NA	1.57	1.11	1.41	18.96	1	0	NVE10202	GL17027 [Drosophila persimilis]		likely misassembled region _ discarded target
scaffold_24	1570001	1570319	scaffold_24_1570160	3	1.26	0.25	3.28	Peak_5423	161.87	3.43	1.13	3.04	16.17	3.2	1.1	2.92	60	Peak_17416	30.86	3.05	0.54	5.69	14.65	3.48	0.57	6.09	60	Peak_6028	128.51	4.26	0.3	14.16	52.92	4.05	0.29	13.97	60	1	0	NVE10444	Islet-1	yes	intronic	yes
scaffold_24	1573359	1573677	scaffold_24_1573518	3	2.13	0.68	4.04	Peak_11600	94.93	2.34	1.15	2.03	13.17	2.08	1.04	2	59.84	Peak_9195	67.8	3.85	0.57	6.72	18.8	4.43	0.66	6.7	60	Peak_9661	92.43	3.26	0.26	12.33	47.59	3.03	0.19	15.75	60	1	0	NVE10444	Islet-1		intronic	yes
scaffold_248	99109	99427	scaffold_248_99268	3	3.3	1.36	3.05	Peak_13774	83.92	2.16	0.36	5.96	12.18	2.04	0.37	5.51	6.26	Peak_3930	136.96	6.17	0.29	21.19	23.21	6.72	0.5	13.45	5.01	Peak_6666	120.8	4.05	1.18	3.43	51.63	3.84	1.11	3.45	4.67	1	0	NVE10734	PREDICTED: LOW QUALITY PROTEIN: protein disulfide-isomerase A4 [Callithrix jacchus]		desert
scaffold_249	245983	246301	scaffold_249_246142	3	4.42	1.47	3.75	Peak_26994	46.57	1.73	0.45	3.84	8.42	1.49	0.43	3.44	55.69	Peak_3869	138.51	6.21	0.32	19.65	23.31	6.57	0.43	15.24	57.85	Peak_5027	143.4	4.69	1.02	4.57	55.43	3.96	0.86	4.59	56.86	1	0	NVE10768		yes
scaffold_249	249067	249385	scaffold_249_249226	2	2.49	0.7	3.02	Peak_27449	45.57	1.72	0.48	3.6	8.32	1.59	0.47	3.39	40.14	Peak_5512	136.27	4.48	0.38	11.72	54.22	3.95	0.34	11.59	40.61	NA	NA	NA	NA	NA	NA	3.17	1.7	1.86	38.21	1	0	NVE10768
scaffold_249	310380	310698	scaffold_249_310539	2	4.61	1.11	3.85	Peak_6991	87.59	4.46	0.33	13.61	20.27	4.77	0.32	14.77	39.75	Peak_7155	115.16	3.89	1.05	3.7	50.96	3.65	0.88	4.15	38.93	NA	NA	NA	NA	NA	NA	1.03	0.42	2.44	46.23	1	0	NVE10775			desert
scaffold_249	312922	313240	scaffold_249_313081	2	2.82	0.98	3.07	Peak_8756	70.95	3.97	1.42	2.79	19.08	4.47	1.51	2.95	58.12	Peak_4345	155.94	5.03	0.44	11.53	57.31	4.73	0.41	11.41	55.54	NA	NA	NA	NA	NA	NA	1.68	1.05	1.59	56.53	1	0	NVE10775			desert
scaffold_249	337555	337873	scaffold_249_337714	2	3.84	1.19	2.87	Peak_6275	95.74	4.73	0.34	13.85	20.85	5.57	0.5	11.08	19.41	Peak_8399	103.29	3.56	0.95	3.75	49.14	3.26	0.87	3.76	21.66	NA	NA	NA	NA	NA	NA	1.45	0.92	1.58	22.41	1	0	NVE10777	Intron-binding protein aquarius [Heterocephalus glaber]		intronic
scaffold_255	155383	155701	scaffold_255_155542	2	1.86	0.44	3.63	Peak_27125	11.72	2.67	0.4	6.68	11.37	2.84	0.44	6.42	59.9	Peak_10411	87.42	3.14	0.21	14.92	46.75	2.83	0.2	13.9	60	NA	NA	NA	NA	NA	NA	1.53	1.08	1.41	60	1	0	NVE11067			NVE11067 is a bad model, NVE11066 is abetter model blc2
scaffold_257	332271	332589	scaffold_257_332430	2	4.86	1.51	2.42	Peak_3988	135.21	6.1	0.41	14.84	23.12	6.59	0.74	8.94	25.53	Peak_5448	137.12	4.52	1.23	3.68	54.42	4.12	1.19	3.46	25.6	NA	NA	NA	NA	NA	NA	1.36	1.89	0.72	27.2	1	0	NVE11139			unclear model at the scafold end_discarded
scaffold_257	84988	85306	scaffold_257_85147	2	3.49	1.18	2.31	Peak_27989	44.22	1.71	0.51	3.34	8.27	1.64	0.42	3.88	19.06	Peak_5550	105.44	5.06	0.38	13.18	21.5	5.71	0.62	9.14	20.11	NA	NA	NA	NA	NA	NA	3.38	2.65	1.28	16.97	1	0	NVE11119	rho guanine nucleotide exchange factor 12-like isoform X9 [Exaiptasia pallida]		intronic
scaffold_259	4818	5136	scaffold_259_4977	2	4.39	1.25	3.8	Peak_5660	103.92	5.01	0.39	12.97	21.4	5.53	0.42	13.3	34.92	Peak_10854	84.7	3.1	1.2	2.59	46.27	2.82	1.06	2.66	29.86	NA	NA	NA	NA	NA	NA	1.26	0.98	1.28	29.76	1	0	NVE11182	multidrug resistance-associated protein 1-like [Exaiptasia pallida]		intronic
scaffold_2604	6001	6319	scaffold_2604_6160	2	3.08	1.81	2.7	Peak_2166	199.34	8.56	0.79	10.86	27.61	9.27	0.91	10.19	17.75	Peak_2528	210.16	6.84	1.89	3.62	63.82	6.14	1.76	3.48	15.91	NA	NA	NA	NA	NA	NA	3.01	2.52	1.2	17.09	0	0	NVE11401			ChIP peak is in the intron of the "PREDICTED: TNF receptor-associated factor 3-like isoform X3 [Acropora digitifera]" for which there is no model. NVE11401 is a not the right model, so it is discarded from the target list
scaffold_262	118876	119194	scaffold_262_119035	3	1.5	0.68	4.1	Peak_2881	229.61	4.67	0.41	11.37	17.94	4.4	0.33	13.43	49.53	Peak_4030	134.3	6.07	0.4	15.24	23.08	6.58	0.41	15.96	45.26	Peak_4420	154.56	5.03	1.88	2.67	57.13	4.74	1.82	2.6	47.91	1	0	NVE11452	bifunctional lysine-specific demethylase and histidyl-hydroxylase MINA-like [Exaiptasia pallida]		intronic
scaffold_262	176299	176617	scaffold_262_176458	3	3.13	1	2.77	Peak_25777	49.45	1.75	0.53	3.29	8.65	1.62	0.51	3.18	19.11	Peak_6163	97.27	4.78	0.41	11.79	20.95	5.07	0.41	12.49	23.13	Peak_7741	109.15	3.7	0.59	6.3	50.11	3.43	0.58	5.88	17.19	1	0	NVE11458	PREDICTED: protein OSCP1-like [Acropora digitifera]	yes	alternative target NVE11457 (Runx) BMP2/4MO padj = 7,54278252921973E-07, fold change = 2,503
scaffold_267	156611	156929	scaffold_267_156770	2	1.99	0.45	4.49	Peak_25394	14.06	2.73	0.42	6.48	11.84	3.03	0.41	7.42	53.31	Peak_11457	81.43	2.99	0.16	18.94	45.61	2.61	0.15	17.04	56.05	NA	NA	NA	NA	NA	NA	1.53	0.92	1.65	55.37	1	0	NVE11604	PREDICTED: protein scribble homolog [Acropora digitifera]		two models (NVE11603 and NVE11604) stand for the same gene
scaffold_267	265823	266141	scaffold_267_265982	2	7.51	1.43	2.95	Peak_5294	109.16	5.2	0.42	12.5	21.78	5.63	0.45	12.38	22.86	Peak_15444	63.75	2.66	1.13	2.35	41.5	2.51	1.03	2.44	18.65	NA	NA	NA	NA	NA	NA	0.75	0.14	5.31	20.12	1	0	NVE11612	sodium/potassium-transporting ATPase subunit beta-1-interacting protein 1-like [Exaiptasia pallida]		intronic
scaffold_27	1004955	1005273	scaffold_27_1005114	2	4.05	1.11	10.17	Peak_6712	90.55	4.54	0.14	32.84	20.46	4.84	0.14	35	12.85	Peak_6283	125.12	4.2	1.83	2.3	52.35	4.04	1.82	2.22	12.56	NA	NA	NA	NA	NA	NA	1.19	0.16	7.39	13.12	1	0	NVE11759	very low-density lipoprotein receptor [Culex quinquefasciatus]		intronic
scaffold_27	406097	406415	scaffold_27_406256	2	4.37	1.19	3.69	Peak_5683	103.6	5	0.31	16.08	21.36	5.3	0.39	13.44	46.55	Peak_10296	88.09	3.17	0.65	4.88	46.91	2.9	0.64	4.53	43.72	NA	NA	NA	NA	NA	NA	1.21	1.18	1.03	44.46	1	0	NVE11724	leucine-rich repeat protein [Edwardsiella ictaluri 93-146]		gene desert_discarded
scaffold_272	14315	14633	scaffold_272_14474	2	3.57	1.37	3.32	Peak_4376	126.27	5.79	0.47	12.44	22.63	6.23	0.53	11.85	57.26	Peak_13757	70.37	2.78	1.34	2.08	43.18	2.63	1.3	2.02	55.08	NA	NA	NA	NA	NA	NA	1.75	0.98	1.78	54.37	1	0	NVE11893	mitochondrial inner membrane protease subunit [Papilio xuthus]			yes
scaffold_275	168431	168749	scaffold_275_168590	2	3.41	0.73	2.79	Peak_19821	24.38	2.94	0.26	11.23	13.75	3.4	0.3	11.22	60	Peak_10315	88.02	3.16	0.32	10.03	46.88	2.89	0.31	9.19	59.99	NA	NA	NA	NA	NA	NA	1	0.5	2.01	60	1	0	NVE11976	seipin isoform 1 [Macaca mulatta]
scaffold_278	292632	292950	scaffold_278_292791	2	4.06	0.72	16.97	Peak_6752	140.77	3.07	1.1	2.8	15.45	2.84	0.97	2.93	60	Peak_10792	85.09	3.08	0.05	56.19	46.33	2.88	0.05	53.3	60	NA	NA	NA	NA	NA	NA	0.71	0.37	1.9	60	1	0	NVE12051	translation elongation factor 1 alpha [Nematostella vectensis]		intronic
scaffold_28	445709	446027	scaffold_28_445868	2	1.55	0.3	2.17	Peak_16807	72.78	2.01	0.67	3.02	10.97	1.88	0.63	3	59.89	Peak_11017	83.73	3.05	0.29	10.66	46.08	2.92	0.29	10.16	59.84	NA	NA	NA	NA	NA	NA	2.53	0.56	4.55	60	1	0	NVE12115	solute carrier family 25 member 38-B-like [Exaiptasia pallida]
scaffold_285	95460	95778	scaffold_285_95619	2	2.65	1.06	2.9	Peak_5965	100.01	4.87	0.38	12.78	21.09	5.46	0.54	10.12	60	Peak_12906	74.17	2.83	0.24	11.88	44.05	2.56	0.23	11.03	59.99	NA	NA	NA	NA	NA	NA	2.06	1.07	1.92	60	1	0	NVE12329	calmodulin-binding transcription activator 2-like [Exaiptasia pallida]
scaffold_2882	8855	9173	scaffold_2882_9014	2	3.23	0.92	2.39	Peak_7193	85.44	4.38	0.43	10.29	20.09	4.59	0.53	8.61	21.12	Peak_8161	105.45	3.63	1.55	2.33	49.52	3.24	1.48	2.19	19.16	NA	NA	NA	NA	NA	NA	1.42	1.61	0.89	16.99	0	0	NVE12422	UBX domain-containing protein 11 [Exaiptasia pallida]		intronic
scaffold_29	122615	122933	scaffold_29_122774	2	2.79	0.72	2.83	Peak_12968	46.98	3.37	0.89	3.77	16.74	3.68	1.03	3.56	60	Peak_9038	97.51	3.39	0.3	11.22	48.35	3.18	0.29	10.88	59.91	NA	NA	NA	NA	NA	NA	1.32	0.85	1.56	59.86	1	0	NVE12482	ryncolin-4-like [Exaiptasia pallida]
scaffold_29	1377825	1378143	scaffold_29_1377984	3	3.52	1.2	4.37	Peak_20020	63.46	1.9	0.72	2.62	9.92	1.64	0.58	2.84	31.04	Peak_4777	118.19	5.51	0.36	15.32	22.31	5.78	0.37	15.62	30.58	Peak_32197	6.07	4.51	1.86	2.42	38	4.02	1.84	2.18	31.74	1	0	NVE12565	ankyrin-3-like isoform X2 [Exaiptasia pallida]		the region and the NVE12565 model look different in the simrbase version of the genome
scaffold_296	237669	237987	scaffold_296_237828	2	1.81	0.98	15.32	Peak_2940	165.9	7.27	1.35	5.38	25.1	7.33	1.33	5.52	58.62	Peak_6034	128.42	4.25	0.09	48.92	52.91	4.06	0.08	49.23	59.37	NA	NA	NA	NA	NA	NA	4.86	3.76	1.29	58.89	1	0	NVE12739	monocarboxylate transporter 3-like [Exaiptasia pallida]
scaffold_297	167703	168021	scaffold_297_167862	3	1.82	0.58	1.99	Peak_9373	111.77	2.59	0.58	4.46	14.17	2.42	0.58	4.18	60	Peak_8663	71.82	3.96	0.44	8.99	19.11	4.4	0.56	7.85	60	Peak_9672	92.33	3.26	0.27	12.09	47.6	3.04	0.27	11.05	60	1	0	NVE12762	SoxC		alternative target NVE12763 MAP/microtubule affinity-regulating kinase 3-like. Both NVE12762 and NVE12763 are approx. equally suppressed upon BMP2/4MO KD
scaffold_299	114009	114327	scaffold_299_114168	2	6.42	1.22	8.51	Peak_7606	81.28	4.24	0.17	24.97	19.72	4.97	0.18	28.36	8.18	Peak_18039	54.88	2.52	1.17	2.15	39.05	2.4	0.97	2.47	6.53	NA	NA	NA	NA	NA	NA	0.77	0.24	3.19	6.76	1	0	NVE12801	cilia- and flagella-associated protein 47-like [Exaiptasia pallida]		alternative target NVE12802 Nematostella MFI
scaffold_3	2264829	2265147	scaffold_3_2264988	3	4.42	3.02	4.45	Peak_9063	114.61	2.96	0.84	3.52	14.31	3	0.84	3.57	11.48	Peak_1111	297.78	12.97	0.7	18.51	34.45	13.24	0.81	16.34	12.15	Peak_16424	60.21	6.16	2.46	2.5	40.57	6.22	2.5	2.49	12.82	1	0	NVE13000	apoptosis-stimulating of p53 protein 2-like [Exaiptasia pallida]	yes	intronic
scaffold_3	2548193	2548511	scaffold_3_2548352	2	3.77	1.12	2.94	Peak_6628	91.58	4.59	0.42	10.87	20.53	5.09	0.42	12.07	42.54	Peak_16899	58.61	2.56	0.58	4.39	40.11	2.32	0.54	4.31	49.39	NA	NA	NA	NA	NA	NA	1.35	0.55	2.45	47.73	1	0	NVE13023	acid-sensing ion channel 2-like [Exaiptasia pallida]
scaffold_3	874195	874513	scaffold_3_874354	2	1.34	0.21	1.93	Peak_14055	82.78	2.14	0.16	13.25	12.05	1.95	0.16	12.44	60	Peak_13415	71.87	2.79	0.28	10.14	43.52	2.52	0.18	14.2	59.89	NA	NA	NA	NA	NA	NA	2.62	0.14	18.91	59.93	1	0	NVE12909	PREDICTED: protein transport protein Sec61 subunit beta-like [Nasonia vitripennis]		intronic	yes
scaffold_30	1400564	1400882	scaffold_30_1400723	3	1.43	0.45	3.96	Peak_2740	235.65	4.82	1.12	4.29	18.33	4.57	1.09	4.19	60	Peak_12158	50.91	3.44	0.45	7.69	17.2	3.57	0.55	6.5	58.89	Peak_3907	165.79	5.34	0.32	16.76	58.65	5.09	0.3	17.06	60	1	0	NVE13181	Dual specificity phosphatase 7 [Nematostella vectensis]	yes	intronic	yes
scaffold_30	1401276	1401594	scaffold_30_1401435	3	1.45	0.47	4.45	Peak_4820	173.19	3.66	1.75	2.09	16.57	3.45	1.71	2.01	60	Peak_6276	95.73	4.73	0.41	11.53	20.85	4.99	0.5	9.88	60	Peak_6923	117.69	3.94	0.24	16.13	51.27	3.78	0.22	17.41	60	1	0	NVE13181	Dual specificity phosphatase 7 [Nematostella vectensis]		intronic	yes
scaffold_303	34445	34763	scaffold_303_34604	2	3.28	1.03	3.58	Peak_6382	94.55	4.68	0.18	26.66	20.78	5.07	0.38	13.26	59.98	Peak_11935	78.92	2.95	0.74	4	45.04	2.79	0.65	4.27	59.95	NA	NA	NA	NA	NA	NA	1.54	1.14	1.36	59.86	1	0	NVE13306	ankyrin repeat domain-containing protein 50-like [Orbicella faveolata]	yes
scaffold_314	159938	160256	scaffold_314_160097	2	3.7	0.96	13.23	Peak_8457	73.53	4	0.16	24.28	19.21	4.34	0.18	24.68	3.45	Peak_7341	113.24	3.8	0.08	47.22	50.64	3.61	0.08	46.14	2.11	NA	NA	NA	NA	NA	NA	1.17	3.47	0.34	7.24	1	0	NVE13720	Scavenger receptor cysteine-rich type 1 protein M130 [Exaiptasia pallida]		intronic
scaffold_32	1026228	1026546	scaffold_32_1026387	3	2.29	1.15	2.4	Peak_5879	153.68	3.28	0.28	11.5	15.91	3.07	0.29	10.67	12.58	Peak_5673	103.77	5.01	0.73	6.83	21.39	5.34	0.76	6.99	17.19	Peak_2200	227.85	7.42	3.09	2.4	65.15	7.03	2.96	2.38	12.04	1	0	NVE13950	RNA helicase Mov10l1-like [Stylophora pistillata]		intronic
scaffold_32	1273210	1273528	scaffold_32_1273369	3	2.17	7.45	12.8	Peak_177	1178.01	22.63	1.26	17.96	13.24	21.98	1.16	18.88	60	Peak_73	1273.14	47.34	1.92	24.64	41.6	47.74	2.03	23.5	59.98	Peak_103	1038.14	34.12	0.62	54.92	85.71	33.38	0.56	59.38	59.99	1	0	NVE13981	Zinc finger protein GLIS3 [Exaiptasia pallida]	yes		yes
scaffold_32	555322	555640	scaffold_32_555481	2	2.84	1.12	2.56	Peak_5850	101.29	4.92	0.48	10.32	21.24	5.56	0.55	10.11	60	Peak_15059	65.2	2.68	0.87	3.09	41.85	2.51	0.83	3.02	60	NA	NA	NA	NA	NA	NA	1.96	0.99	1.98	60	1	0	NVE13892	titin-like [Exaiptasia pallida]		intronic	yes
scaffold_32	9244	9562	scaffold_32_9403	3	2.74	0.93	8.53	Peak_19269	65.44	1.92	0.49	3.93	10.16	1.76	0.47	3.73	25.34	Peak_6603	91.81	4.59	0.15	30.44	20.54	4.82	0.16	30.65	22.67	Peak_15726	62.67	2.62	0.4	6.64	41.23	2.46	0.37	6.66	22.01	1	0	NVE13842			wrong model_discarded
scaffold_320	166294	166612	scaffold_320_166453	2	4.16	1.09	3.24	Peak_7508	82.23	4.28	0.42	10.15	19.83	4.9	0.44	11.2	13.89	Peak_14667	66.7	2.71	1.28	2.11	42.24	2.55	1.18	2.16	14.03	NA	NA	NA	NA	NA	NA	1.18	1.29	0.92	17.26	1	0	NVE13996	Conserved oligomeric Golgi complex subunit 1 [Stylophora pistillata]		intronic
scaffold_322	186090	186408	scaffold_322_186249	3	2.03	0.57	2.32	Peak_15106	78.7	2.09	0.86	2.45	11.62	1.91	0.65	2.92	56.21	Peak_12972	46.97	3.36	0.42	7.97	16.74	3.86	0.41	9.48	54.86	Peak_11101	83.28	3.04	0.3	10.08	45.99	2.96	0.29	10.23	54.87	1	0	NVE14035	PREDICTED: N-acetyltransferase 11-like [Saccoglossus kowalevskii]		intronic
scaffold_325	199703	200021	scaffold_325_199862	2	2.9	1.04	3.69	Peak_6478	93.42	4.65	0.29	15.81	20.67	5.27	0.4	13.24	9.55	Peak_13454	71.69	2.8	1.09	2.57	43.48	2.61	1.03	2.54	6.1	NA	NA	NA	NA	NA	NA	1.82	0.98	1.85	9.28	1	0	NVE14088	PREDICTED: tetratricopeptide repeat domain 1-like [Saccoglossus kowalevskii]		peak in a gene desert
scaffold_327	11204	11522	scaffold_327_11363	2	4	2.52	3.63	Peak_1585	238.69	10.33	0.85	12.13	30.73	11.45	0.88	13.07	11.37	Peak_2857	196.82	6.44	2.81	2.29	62.47	5.85	2.56	2.28	12.04	NA	NA	NA	NA	NA	NA	2.86	1.39	2.05	12.27	1	0	NVE14111	hypothetical protein BRAFLDRAFT_108985 [Branchiostoma floridae]		wrong model - discarded
scaffold_334	77791	78109	scaffold_334_77950	2	4.22	1.35	3.7	Peak_5659	103.93	5.01	0.44	11.47	21.4	5.8	0.43	13.5	36.04	Peak_19476	50.32	2.46	1.05	2.34	37.83	2.29	0.93	2.46	21.38	NA	NA	NA	NA	NA	NA	1.37	0.59	2.32	24.15	1	0	NVE14390	acetylcholinesterase-like [Exaiptasia pallida]
scaffold_34	1241513	1241831	scaffold_34_1241672	2	2.95	0.95	7.39	Peak_7392	83.3	4.31	0.18	23.96	19.95	4.79	0.19	25.13	58.18	Peak_16071	61.48	2.61	0.45	5.83	40.91	2.42	0.44	5.5	56.72	NA	NA	NA	NA	NA	NA	1.62	1.5	1.08	56.61	1	0	NVE14619
scaffold_34	713346	713664	scaffold_34_713505	2	1.61	0.38	2.75	Peak_16631	33.18	3.1	0.79	3.92	15.03	3.4	0.91	3.73	60	Peak_9737	91.91	3.25	0.28	11.42	47.52	3.05	0.28	10.85	60	NA	NA	NA	NA	NA	NA	2.12	1.16	1.82	59.96	1	0	NVE14577	axin
scaffold_34	976411	976729	scaffold_34_976570	2	2.96	1.04	3.43	Peak_5595	104.85	5.04	0.34	14.69	21.48	5.4	0.45	11.9	29.09	Peak_9699	92.14	3.28	1.53	2.14	47.57	3.13	1.49	2.1	27.19	NA	NA	NA	NA	NA	NA	1.82	1.56	1.17	23.5	1	0	NVE14596			desert_model discarded as irrelevant
scaffold_346	137823	138141	scaffold_346_137982	3	1.53	0.74	2.82	Peak_2181	266.06	5.38	0.48	11.15	17.82	5.09	0.46	10.94	60	Peak_7439	82.91	4.3	0.34	12.49	19.9	4.6	0.43	10.76	60	Peak_2214	226.89	7.31	0.41	17.9	65.1	7.02	0.36	19.31	59.85	1	0	NVE14738			upstream of unknown and downstream of ZnF protein 36, C3H1 type-like 2-B. Both genes significantly affected in BMP2/4MO	yes
scaffold_349	188496	188814	scaffold_349_188655	2	2.47	1.54	6.71	Peak_4711	175.7	3.67	0.14	26.53	16.72	3.43	0.14	24.93	3.03	Peak_2799	171.6	7.45	0.52	14.35	25.38	8.47	0.75	11.24	2.54	NA	NA	NA	NA	NA	NA	7.46	4.11	1.81	1.91	1	0	NVE14827	PREDICTED: adenosine 3'-phospho 5'-phosphosulfate transporter 2 [Monodelphis domestica]		intronic
scaffold_351	67661	67979	scaffold_351_67820	2	2.38	0.59	4.14	Peak_18757	27.16	2.98	0.19	15.65	14.16	3.33	0.21	16.19	60	Peak_10283	88.18	3.16	0.18	17.21	46.92	2.99	0.18	16.28	60	NA	NA	NA	NA	NA	NA	1.4	0.37	3.83	60	1	0	NVE14968	small peak, bicaudal		intronic	yes
scaffold_36	1129256	1129574	scaffold_36_1129415	3	2.86	1.28	5.45	Peak_10931	99.28	2.41	1.18	2.05	13.46	2.27	1.18	1.93	39.88	Peak_3790	140.7	6.27	0.24	25.61	23.45	6.51	0.35	18.72	43.56	Peak_3024	190.57	6.22	2.1	2.96	61.77	5.5	1.93	2.84	40.76	1	0	NVE15232	Si:ch211-215a10.4 protein [Danio rerio]		wrong model spanning multiple other models_discarded
scaffold_37	223211	223529	scaffold_37_223370	2	2.5	1.01	2.81	Peak_5373	108.17	5.18	0.9	5.75	21.61	5.74	1	5.71	60	Peak_4807	147.33	4.79	0.38	12.53	56	4.52	0.37	12.3	59.56	NA	NA	NA	NA	NA	NA	2.3	0.82	2.81	59.84	1	0	NVE15434			wrong model_discarded
scaffold_374	200001	200319	scaffold_374_200160	3	1.74	0.42	5.67	Peak_15224	78.28	2.08	0.69	3.04	11.58	1.94	0.6	3.23	27.38	Peak_16997	32.1	3.07	0.15	20.9	14.83	3.39	0.15	22.23	33.69	Peak_10732	85.48	3.09	0.17	18.37	46.38	2.8	0.16	17.07	33.05	1	0	NVE15644	titin		intronic
scaffold_374	200227	200545	scaffold_374_200386	3	1.62	0.38	3.87	Peak_14363	81.63	2.13	0.78	2.75	11.92	1.99	0.75	2.65	18.41	Peak_16409	33.84	3.12	1.09	2.85	15.16	3.21	1.09	2.95	22.59	Peak_9502	93.64	3.29	0.25	13.38	47.79	3.01	0.21	14.41	23.29	1	0	NVE15644	titin		intronic
scaffold_378	143051	143369	scaffold_378_143210	2	2.83	0.77	7.55	Peak_11313	55.3	3.52	0.14	24.8	17.63	3.99	0.15	27.5	60	Peak_8467	102.65	3.52	0.3	11.88	49.04	3.27	0.29	11.22	59.49	NA	NA	NA	NA	NA	NA	1.41	0.87	1.63	60	1	0	NVE15735	rgm			yes
scaffold_378	144180	144498	scaffold_378_144339	2	2.18	0.68	4.37	Peak_12929	47.15	3.36	0.39	8.68	16.76	3.82	0.37	10.22	60	Peak_6515	122.47	4.08	0.23	17.45	51.92	3.75	0.23	16.18	60	NA	NA	NA	NA	NA	NA	1.75	1.54	1.14	60	1	0	NVE15735	rgm
scaffold_38	356003	356321	scaffold_38_356162	2	7.53	1.27	2.64	Peak_6690	90.76	4.56	0.41	11.12	20.49	4.98	0.43	11.64	5.67	Peak_25604	33.28	2.27	0.73	3.12	33.4	2.09	0.7	2.97	5.23	NA	NA	NA	NA	NA	NA	0.66	0.14	4.76	11.86	1	0	NVE15801	fibulin-1-like [Exaiptasia pallida]		intronic
scaffold_38	653153	653471	scaffold_38_653312	3	1.41	0.6	4.97	Peak_2235	262.76	5.32	0.9	5.94	17.92	5.04	0.89	5.69	60	Peak_3404	150.59	6.6	0.24	27.91	24.1	7.13	0.31	22.81	60	Peak_2782	199.51	6.44	0.41	15.85	62.78	5.99	0.38	15.82	60	1	0	NVE15826	ankyrin repeat and SOCS box protein 13-like [Exaiptasia pallida]		NVE15827 is a wrong model, peak reassigned to NVE15826	yes
scaffold_385	80507	80825	scaffold_385_80666	3	1.22	0.3	12.18	Peak_2820	231.83	4.75	1.26	3.77	18.12	4.52	1.2	3.78	49.92	Peak_6158	97.37	4.8	0.87	5.49	20.95	5.52	1.01	5.46	45.99	Peak_4128	160.44	5.16	0.12	42.61	58.01	4.87	0.12	41.13	48.31	1	0	NVE15986	NocA			yes
scaffold_385	84185	84503	scaffold_385_84344	3	1.14	0.25	31.3	Peak_1596	307.18	6.18	1.13	5.45	18.9	5.93	1.02	5.78	59.97	Peak_3627	144.5	6.42	0.65	9.89	23.79	6.77	0.7	9.68	59.98	Peak_2774	199.87	6.44	0.06	103.57	62.79	6.15	0.06	101.58	59.94	1	0	NVE15986	NocA			yes
scaffold_385	84590	84908	scaffold_385_84749	3	2.51	2.51	3.73	Peak_2005	276.24	5.58	0.84	6.65	17.96	5.2	0.82	6.3	59.95	Peak_1229	278.17	11.99	0.75	15.95	33.71	13.02	0.78	16.62	59.97	Peak_3073	189.23	6.1	0.33	18.36	61.49	5.81	0.32	18.2	59.89	1	0	NVE15986	NocA			yes
scaffold_387	123163	123481	scaffold_387_123322	2	1.34	0.55	2.27	Peak_3365	151.74	6.66	0.64	10.45	24.18	7.55	0.81	9.28	25.58	Peak_2281	223.06	7.26	2.33	3.12	64.89	6.62	2.14	3.09	30.01	NA	NA	NA	NA	NA	NA	5.66	2.87	1.97	27.06	1	0	NVE16018			desert, NVE16018 is not expressed_discarded
scaffold_39	1084451	1084769	scaffold_39_1084610	3	1.4	0.33	2.51	Peak_8517	119.82	2.72	0.57	4.76	14.56	2.52	0.56	4.53	60	Peak_14490	40.51	3.24	0.93	3.49	16.05	3.5	0.98	3.58	60	Peak_7657	109.91	3.72	0.31	12.07	50.22	3.51	0.3	11.55	60	1	0	NVE16132	gremlin [Nematostella vectensis]	yes	3' peak of gremlin, not NVE16131	yes
scaffold_39	1086864	1087182	scaffold_39_1087023	3	1.65	0.57	2.72	Peak_5883	153.6	3.28	0.33	9.9	15.91	3.01	0.32	9.29	60	Peak_10491	59.81	3.64	0.44	8.29	18.15	4.22	0.46	9.25	60	Peak_3981	164.06	5.29	0.38	13.97	58.41	4.96	0.28	17.41	60	1	0	NVE16132	gremlin [Nematostella vectensis]	yes
scaffold_4	1293130	1293448	scaffold_4_1293289	3	1.25	0.21	3.51	Peak_7378	132.14	2.91	0.16	17.92	15.24	2.66	0.16	16.92	59.98	Peak_14856	39.22	3.2	0.33	9.81	15.84	3.34	0.42	8.02	60	Peak_12275	77.17	2.9	0.54	5.41	44.71	2.8	0.53	5.28	59.96	1	0	NVE16399	RING finger protein 44 [Camponotus floridanus]		alternative target NVE16400 (proline-rich nuclear receptor coactivator 2-like)
scaffold_4	1340940	1341258	scaffold_4_1341099	3	1.21	0.28	10.5	Peak_2455	249.97	5.06	0.76	6.7	18.08	4.78	0.73	6.57	60	Peak_10038	62.38	3.71	0.51	7.27	18.4	3.94	0.53	7.48	60	Peak_4229	158.36	5.1	0.12	40.79	57.67	4.77	0.12	38.52	60	1	0	NVE16405	nanos2			yes
scaffold_4	2369962	2370280	scaffold_4_2370121	2	1.47	0.4	2.25	Peak_3015	224.32	4.59	1.03	4.45	18	4.21	0.86	4.88	59.98	Peak_8625	101.17	3.48	0.3	11.55	48.83	3.29	0.3	10.9	59.95	NA	NA	NA	NA	NA	NA	2.86	0.8	3.58	60	1	0	NVE16502
scaffold_4	2648226	2648544	scaffold_4_2648385	2	3.62	1.49	4.12	Peak_3714	142.66	6.34	0.45	13.96	23.6	7.05	0.48	14.63	34.64	Peak_6030	128.48	4.28	0.99	4.33	52.92	3.93	0.95	4.14	28.2	NA	NA	NA	NA	NA	NA	1.95	1.92	1.01	34.43	1	0	NVE16531	PREDICTED: sodium- and chloride-dependent GABA transporter 1-like [Metaseiulus occidentalis]
scaffold_4	2700337	2700655	scaffold_4_2700496	3	1.66	0.53	2.13	Peak_8514	119.83	2.72	0.95	2.86	14.56	2.6	0.75	3.46	44.5	Peak_8978	69.26	3.88	0.46	8.48	18.88	4.31	0.45	9.55	44.15	Peak_6087	127.76	4.24	0.41	10.43	52.79	4.07	0.4	10.13	42	1	0	NVE16537	sodium/hydrogen exchanger 8-like [Stylophora pistillata]		NVE16536 wrong model, no reads, peak reassigned to NVE16537
scaffold_4	60960	61278	scaffold_4_61119	2	5.49	1.12	2.16	Peak_6563	92.39	4.61	0.42	10.98	20.57	4.7	0.44	10.63	14.12	Peak_27085	29.23	2.24	0.69	3.27	32.53	2.24	0.68	3.3	11.99	NA	NA	NA	NA	NA	NA	0.86	0.15	5.62	8.17	1	0	NVE16286	AP-5 complex subunit beta-1-like [Exaiptasia pallida]		intronic
scaffold_40	416242	416560	scaffold_40_416401	3	1.89	0.55	8.07	Peak_13093	86.95	2.21	0.5	4.45	12.46	2.12	0.47	4.46	60	Peak_9109	68.41	3.86	0.41	9.47	18.87	4	0.41	9.7	60	Peak_9186	96.26	3.36	0.11	29.44	48.14	3.24	0.1	30.85	60	1	0	NVE16578	lmx1b/LIM homeobox transcription factor 1-beta-like isoform X5 [Exaiptasia pallida]			yes
scaffold_404	97499	97817	scaffold_404_97658	2	4.23	1.18	6.26	Peak_6116	97.87	4.8	0.16	29.76	20.96	5.35	0.25	21.04	20	Peak_9357	94.82	3.34	1.04	3.21	47.97	3.01	1.02	2.96	16.69	NA	NA	NA	NA	NA	NA	1.26	0.78	1.63	20.58	1	0	NVE16701			peak in a gene desert
scaffold_408	36615	36933	scaffold_408_36774	3	1.58	0.4	3.06	Peak_9615	109.52	2.56	1.02	2.52	14.11	2.36	0.99	2.39	59.97	Peak_12575	48.77	3.39	0.28	12.32	16.97	3.72	0.32	11.57	59.88	Peak_11601	80.77	2.98	0.25	11.74	45.44	2.84	0.25	11.58	59.73	1	0	NVE16748	CDP-diacylglycerol--inositol 3-phosphatidyltransferase-like [Orbicella faveolata]
scaffold_41	173587	173905	scaffold_41_173746	2	2.93	0.99	9.77	Peak_6489	93.23	4.64	0.14	33.5	20.65	4.93	0.14	35.57	26.89	Peak_18564	53.22	2.48	0.17	14.46	38.55	2.33	0.14	17	22.01	NA	NA	NA	NA	NA	NA	1.68	0.95	1.76	23.84	1	0	NVE16802	Zinc finger protein 238 [Larimichthys crocea]
scaffold_41	455201	455519	scaffold_41_455360	3	3.52	1.31	1.92	Peak_22980	56.12	1.85	0.73	2.55	9.2	1.8	0.73	2.48	32.58	Peak_4386	126.1	5.87	0.56	10.55	22.63	6.35	0.76	8.36	33.42	Peak_6903	117.9	4	1.45	2.76	51.29	3.82	1.41	2.72	33.58	1	0	NVE16829	Acid-sensing ion channel 4 [Exaiptasia pallida]
scaffold_42	284265	284583	scaffold_42_284424	3	1.6	0.44	2.83	Peak_8581	119.18	2.72	1.35	2.01	14.53	2.54	1.32	1.93	43.75	Peak_10357	60.5	3.67	0.86	4.27	18.23	4.06	0.92	4.39	42.28	Peak_7459	112.04	3.77	0.32	11.86	50.44	3.51	0.31	11.37	40.46	1	0	NVE17057	neurexin-4-like [Orbicella faveolata]
scaffold_42	575560	575878	scaffold_42_575719	3	1.81	0.57	3.05	Peak_11021	98.65	2.4	1.03	2.32	13.42	2.27	0.93	2.44	36.58	Peak_10300	60.83	3.69	1.31	2.81	18.27	3.82	1.42	2.7	36.78	Peak_6014	128.63	4.27	0.35	12.18	52.96	4.09	0.35	11.71	36.84	1	0	NVE17090			no corresponding NV2 model
scaffold_42	579752	580070	scaffold_42_579911	2	2.28	0.8	2.73	Peak_7042	86.99	4.44	0.42	10.52	20.22	4.65	0.46	10.17	15.7	Peak_15013	65.38	2.68	0.96	2.81	41.89	2.57	0.95	2.7	11.65	NA	NA	NA	NA	NA	NA	2.04	1.43	1.43	13.25	1	0	NVE17090			no corresponding NV2 model
scaffold_421	12679	12997	scaffold_421_12838	2	2.14	1.01	2.84	Peak_3856	138.76	6.23	0.61	10.19	23.34	6.47	0.59	10.88	18.54	Peak_3746	169.66	5.53	2	2.77	59.16	5.33	1.93	2.77	22.27	NA	NA	NA	NA	NA	NA	3.03	1.5	2.02	21.36	1	0	NVE17171	PREDICTED: similar to mosaic eyes [Hydra magnipapillata]
scaffold_43	1081102	1081420	scaffold_43_1081261	3	3.52	1.34	2.54	Peak_13676	84.39	2.18	1.06	2.06	12.24	1.84	0.86	2.13	40.33	Peak_4932	115.51	6.29	0.52	12.07	22.23	6.46	0.6	10.75	41.31	Peak_6686	120.56	4.03	0.81	4.96	51.6	3.86	0.79	4.87	38.31	1	0	NVE17400	Polypyrimidine tract-binding protein 2 [Heterocephalus glaber]		desert, NVE17400 discarded as irrelevant
scaffold_43	154951	155269	scaffold_43_155110	2	1.44	0.34	9.68	Peak_19059	26.36	2.98	1.11	2.69	14.02	3.38	1.27	2.67	58.79	Peak_6662	120.82	4.02	0.16	24.54	51.64	3.87	0.12	31.12	59.53	NA	NA	NA	NA	NA	NA	2.69	1.77	1.52	58.96	1	0	NVE17321	Mitochondrial sodium/hydrogen exchanger 9B2 [Exaiptasia pallida]
scaffold_435	55184	55502	scaffold_435_55343	3	5.59	2.31	4.62	Peak_21801	58.88	1.85	0.9	2.06	9.45	1.73	0.81	2.13	35.1	Peak_1919	212.31	9.06	0.6	15.12	29	9.68	0.59	16.29	35.05	Peak_4372	155.39	5.05	1.84	2.74	57.27	4.78	1.75	2.73	34.26	1	0	NVE17501	protein disulfide-isomerase, partial [Clonorchis sinensis]		no corresponding NV2 model
scaffold_44	107262	107580	scaffold_44_107421	2	4.11	1.33	11.31	Peak_4612	121.19	5.6	0.16	34.98	22.5	6	0.17	36.09	28.07	Peak_10218	88.5	3.19	1.06	3.01	47.02	3.12	1.04	3.01	26.78	NA	NA	NA	NA	NA	NA	1.46	1.04	1.4	27.17	1	0	NVE17573		yes		yes
scaffold_44	210429	210747	scaffold_44_210588	2	4.22	1.07	5.76	Peak_6665	91.13	4.56	0.2	22.44	20.52	4.84	0.21	22.62	20.76	Peak_8972	98.11	3.4	0.24	14.31	48.43	3.28	0.23	13.99	14.31	NA	NA	NA	NA	NA	NA	1.15	0.42	2.72	24.34	1	0	NVE17589	sec14 cytosolic factor-like [Exaiptasia pallida]		intronic
scaffold_44	645437	645755	scaffold_44_645596	2	4.1	1.56	2.96	Peak_3993	135.08	6.1	0.57	10.78	23.09	6.85	0.64	10.76	43.88	Peak_10601	86.3	3.15	1.52	2.06	46.54	2.89	1.5	1.92	38.44	NA	NA	NA	NA	NA	NA	1.67	0.91	1.84	40.24	1	0	NVE17630			no corresponding NV2 model; alternative targets NVE17629 (Neuronal PAS domain-containing protein 3) or NVE17631 (nositol hexakisphosphate kinase 1)
scaffold_444	135222	135540	scaffold_444_135381	2	4.95	1.23	2.29	Peak_6090	98.27	4.82	0.46	10.44	21.01	5.32	0.56	9.47	28.25	Peak_8958	98.24	3.41	0.55	6.16	48.46	3.31	0.55	6.05	26.29	NA	NA	NA	NA	NA	NA	1.07	0.69	1.56	23.32	1	0	NVE17760	hypothetical protein TRIADDRAFT_64201 [Trichoplax adhaerens]		intronic
scaffold_449	78949	79267	scaffold_449_79108	2	4.35	1.33	4.99	Peak_4775	118.2	5.51	0.3	18.1	22.32	5.93	0.3	19.69	15.37	Peak_5306	138.87	4.58	1.78	2.58	54.78	4.28	1.7	2.51	10.86	NA	NA	NA	NA	NA	NA	1.36	0.14	9.54	12.02	1	0	NVE17802	receptor-type tyrosine-protein phosphatase epsilon-like [Exaiptasia pallida]		intronic
scaffold_45	242332	242650	scaffold_45_242491	2	4.55	1.19	3.44	Peak_6027	99.12	4.84	0.45	10.8	21.05	5.28	0.46	11.6	5.33	Peak_10318	87.96	3.18	1.32	2.41	46.88	2.99	1.26	2.37	10.44	NA	NA	NA	NA	NA	NA	1.16	2.54	0.46	10.69	1	0	NVE17829			wrong model_discarded
scaffold_453	112454	112772	scaffold_453_112613	2	1.6	0.37	3.12	Peak_6908	138.74	3.05	1.48	2.06	15.39	2.89	1.48	1.95	60	Peak_8217	104.81	3.58	0.3	11.87	49.42	3.36	0.27	12.44	59.97	NA	NA	NA	NA	NA	NA	2.09	0.42	4.98	60	1	0	NVE17939	PREDICTED: perilipin-2 isoform X4 [Strongylocentrotus purpuratus]
scaffold_453	73731	74049	scaffold_453_73890	2	2.88	1.52	4.43	Peak_3040	162.03	7.07	0.48	14.66	24.96	8.03	0.53	15.06	52.43	Peak_3961	164.55	5.39	2.66	2.03	58.46	4.93	2.44	2.02	48.06	NA	NA	NA	NA	NA	NA	2.79	1.82	1.54	49.61	1	0	NVE17934	Kinesin light chain [Stylophora pistillata]
scaffold_4568	1286	1604	scaffold_4568_1445	3	2.21	0.79	2.46	Peak_11480	95.63	2.34	0.79	2.98	13.21	2.26	0.79	2.86	25.06	Peak_6610	91.69	4.59	0.34	13.42	20.56	4.99	0.44	11.3	27.01	Peak_7298	113.54	3.82	0.51	7.51	50.74	3.53	0.44	8.1	26.03	0	0	NVE17975			wrong model_discarded
scaffold_46	195929	196247	scaffold_46_196088	3	2.43	1	11.52	Peak_11806	93.75	2.32	1.1	2.12	13.09	2.18	1.1	1.98	60	Peak_5697	103.45	4.98	0.14	36.01	21.34	5.3	0.14	38.31	60	Peak_16505	59.91	2.58	0.43	6.06	40.49	2.45	0.42	5.83	60	1	0	NVE18028	hh1/Tiggy-winkle hedgehog protein [Exaiptasia pallida]			yes
scaffold_46	214424	214742	scaffold_46_214583	3	2.05	0.92	11	Peak_6714	141.26	3.07	0.55	5.61	15.48	2.85	0.44	6.42	51.1	Peak_5138	111.98	5.28	0.15	36.27	21.97	5.85	0.15	37.96	51.45	Peak_7587	110.72	3.76	1.01	3.72	50.27	3.41	0.93	3.69	54.23	1	0	NVE18030			wrong model_discarded
scaffold_46	250768	251086	scaffold_46_250927	3	2.86	0.86	1.79	Peak_26293	48.26	1.74	0.39	4.52	8.55	1.59	0.38	4.22	38.56	Peak_7423	83.03	4.3	0.37	11.51	19.92	4.54	0.47	9.61	33.87	Peak_11118	83.19	3.05	0.66	4.65	45.98	2.75	0.64	4.27	34.5	1	0	NVE18033	biogenesis of lysosome-related organelles complex 1 subunit 1-like [Orbicella faveolata]		intronic
scaffold_47	232159	232477	scaffold_47_232318	3	1.4	0.39	2.16	Peak_6350	146.52	3.16	0.56	5.66	15.76	2.97	0.54	5.5	60	Peak_8656	71.84	3.96	0.36	11.12	19.1	4.12	0.38	10.74	60	Peak_10753	85.31	3.09	0.27	11.44	46.37	2.94	0.23	12.73	60	1	0	NVE18272	protein BTG2-like [Orbicella faveolata]
scaffold_48	48356	48674	scaffold_48_48515	3	3.54	2.79	3.63	Peak_4319	184.99	3.86	1.14	3.38	17.12	3.74	1.06	3.53	18.84	Peak_1149	291.5	12.5	0.93	13.46	34.12	13.22	0.93	14.23	18.41	Peak_2339	220.03	7.15	2.26	3.16	64.68	6.94	2.21	3.13	16.32	1	0	NVE18472	LHX9-like
scaffold_485	49511	49829	scaffold_485_49670	2	5.15	2.16	3.52	Peak_1955	210.59	8.97	0.35	25.64	28.68	9.11	0.61	14.94	9.51	Peak_5809	131.53	4.38	1.55	2.82	53.48	4.21	1.48	2.84	8.05	NA	NA	NA	NA	NA	NA	1.77	0.17	10.17	6.9	1	0	NVE18613
scaffold_49	1104448	1104766	scaffold_49_1104607	3	2.94	1.05	3.56	Peak_18882	66.6	1.93	0.43	4.45	10.26	1.87	0.42	4.47	18.35	Peak_6068	98.53	4.82	0.36	13.36	21.02	5.5	0.4	13.92	21.95	Peak_6495	122.65	4.11	1.7	2.42	51.96	3.84	1.65	2.33	18.51	1	0	NVE18768	PREDICTED: LOW QUALITY PROTEIN: voltage-dependent calcium channel type A subunit alpha-1 [Nasonia vitripennis]		intronic
scaffold_49	481443	481761	scaffold_49_481602	3	3.37	3.21	9.52	Peak_2437	250.86	5.1	1.9	2.69	18.06	4.69	1.72	2.72	10.15	Peak_902	333.6	14.4	0.51	28.01	37.06	15.79	0.51	31.24	10.55	Peak_1184	316.07	10.39	4.04	2.57	70.89	9.73	3.7	2.63	8.23	1	0	NVE18717	probable signal peptidase complex subunit 2 [Exaiptasia pallida]		NVE18717 and NVE18718 are split models of the same gene
scaffold_49	599022	599340	scaffold_49_599181	2	3.69	0.86	5.75	Peak_16085	34.87	3.13	0.47	6.64	15.31	3.51	0.47	7.39	55.05	Peak_8058	106.37	3.61	0.16	22.26	49.65	3.56	0.16	21.74	51.04	NA	NA	NA	NA	NA	NA	0.96	0.37	2.62	52.31	1	0	NVE18726	Neuropilin-2 [Stylophora pistillata]		intronic
scaffold_49	76040	76358	scaffold_49_76199	2	1.15	0.11	4	Peak_9494	110.69	2.56	0.24	10.64	14.14	2.36	0.16	14.63	59.98	Peak_12441	76.34	2.89	0.71	4.09	44.51	2.72	0.64	4.26	60	NA	NA	NA	NA	NA	NA	2.41	0.14	17.41	60	1	0	NVE18683	Hes2, partial [Nematostella vectensis]			yes
scaffold_49	92821	93139	scaffold_49_92980	2	4.04	1.23	8.2	Peak_5260	109.84	5.21	0.21	24.61	21.82	5.66	0.21	26.85	35.37	Peak_7052	116.22	3.92	1.01	3.87	51.11	3.62	1	3.62	30.43	NA	NA	NA	NA	NA	NA	1.4	1.29	1.08	34.65	1	0	NVE18684	PREDICTED: conserved oligomeric Golgi complex subunit 5-like [Strongylocentrotus purpuratus]		intronic
scaffold_490	119653	119971	scaffold_490_119812	2	2.27	0.61	2.85	Peak_15010	38.67	3.21	0.98	3.26	15.79	3.48	1.1	3.18	43.19	Peak_8726	100.2	3.46	0.34	10.05	48.71	3.24	0.31	10.49	44.06	NA	NA	NA	NA	NA	NA	1.53	1.4	1.1	41.02	1	0	NVE18784	hypothetical protein BRAFLDRAFT_88356 [Branchiostoma floridae]		end of scaffold, bad model_discarded
scaffold_490	125763	126081	scaffold_490_125922	3	2.2	0.66	2.62	Peak_16227	74.71	2.04	0.79	2.59	11.19	1.89	0.78	2.43	59.9	Peak_8751	70.99	3.94	0.35	11.37	19.08	4.17	0.46	9.09	59.99	Peak_10310	88.04	3.16	0.27	11.84	46.89	2.96	0.27	11.08	60	1	0	NVE18784	hypothetical protein BRAFLDRAFT_88356 [Branchiostoma floridae]		end of scaffold, bad model_discarded
scaffold_5	1188265	1188583	scaffold_5_1188424	3	2.61	1.78	2.7	Peak_4174	188.36	3.92	0.41	9.58	17.28	3.74	0.41	9.02	59.98	Peak_1828	219.07	9.42	0.65	14.43	29.56	9.78	0.63	15.43	60	Peak_1811	252.3	8.16	0.44	18.65	67.19	7.86	0.43	18.13	60	1	0	NVE18982	PREDICTED: kinesin-like protein KIF26B [Acropora digitifera]	yes		yes
scaffold_5	2224956	2225274	scaffold_5_2225115	3	2.73	0.93	2.61	Peak_16895	72.47	2.01	0.86	2.34	10.94	1.86	0.83	2.25	55.4	Peak_6835	89	4.52	0.72	6.28	20.37	5.08	0.88	5.76	57.69	Peak_8659	100.92	3.48	0.33	10.4	48.76	3.27	0.29	11.22	54.31	1	0	NVE19105	ectonucleotide pyrophosphatase/phosphodiesterase family member 5-like isoform X1 [Exaiptasia pallida]		NVE19106 is a misassembly, peak reassigned to NVE19105
scaffold_5	24351	24669	scaffold_5_24510	2	2.52	1.45	4.06	Peak_2622	178.48	7.73	0.51	15.27	25.7	8.27	0.57	14.61	7.09	Peak_2935	194.18	6.33	1.78	3.57	62.12	6.16	1.77	3.49	7.25	NA	NA	NA	NA	NA	NA	3.28	2.04	1.61	6.31	1	0	NVE18878	multidrug resistance protein 1-like [Exaiptasia pallida]		intronic
scaffold_50	1102252	1102570	scaffold_50_1102411	3	2.04	0.67	2.16	Peak_11286	96.93	2.36	0.41	5.79	13.32	2.22	0.4	5.57	59.87	Peak_8336	74.56	4.04	0.24	17.07	19.25	4.52	0.35	12.79	60	Peak_7982	107.03	3.64	0.32	11.37	49.76	3.36	0.31	10.93	60	1	0	NVE19233	follicle-stimulating hormone receptor-like isoform X2 [Exaiptasia pallida]	yes		yes
scaffold_50	603090	603408	scaffold_50_603249	2	3.97	1.28	3.94	Peak_5682	103.61	4.99	0.26	19.47	21.37	5.76	0.42	13.68	11.94	Peak_12065	78.15	2.94	1.13	2.6	44.93	2.7	0.93	2.89	10.3	NA	NA	NA	NA	NA	NA	1.45	1.4	1.04	13.19	1	0	NVE19189			wrong model_discarded
scaffold_51	1087580	1087898	scaffold_51_1087739	3	1.3	0.32	7.43	Peak_4351	184.08	3.85	1.01	3.8	17.06	3.73	0.82	4.56	59.78	Peak_6514	92.98	4.63	0.28	16.44	20.62	4.83	0.31	15.64	60	Peak_5095	142.31	4.63	0.18	26.17	55.27	4.45	0.15	30.23	59.61	1	0	NVE19435	RNA-dependent RNA polymerase 2 [Exaiptasia pallida]			yes
scaffold_51	1158711	1159029	scaffold_51_1158870	2	3.38	1.14	1.94	Peak_5822	101.64	4.93	0.4	12.39	21.29	5.47	0.62	8.81	0.63	Peak_11257	82.4	3.04	1.17	2.59	45.82	2.86	1.14	2.5	0.35	NA	NA	NA	NA	NA	NA	1.62	0.44	3.67	0.58	1	0	NVE19437	Fibroblast growth factor 8-17-like [Nematostella vectensis]
scaffold_51	558371	558689	scaffold_51_558530	2	2.38	0.56	12.16	Peak_21118	21.64	2.88	0.42	6.9	13.27	3.05	0.44	6.99	59.97	Peak_10627	86.19	3.11	0.13	23.37	46.48	2.87	0.07	41.34	59.81	NA	NA	NA	NA	NA	NA	1.28	0.42	3.04	58.95	1	0	NVE19380	sideroflexin-5-like [Stylophora pistillata]
scaffold_51	872017	872335	scaffold_51_872176	2	3.54	1.03	7.83	Peak_6864	88.68	4.49	0.18	25.55	20.33	4.95	0.19	26	16.02	Peak_10475	87.08	3.17	1.47	2.15	46.69	2.94	1.35	2.17	16.39	NA	NA	NA	NA	NA	NA	1.4	0.49	2.87	19.7	1	0	NVE19409	dopamine D2-like receptor [Orbicella faveolata]
scaffold_52	288423	288741	scaffold_52_288582	2	4.05	1.45	2.35	Peak_25831	49.33	1.75	0.58	3.03	8.64	1.62	0.49	3.3	8.95	Peak_3949	136.33	6.16	0.41	15.09	23.19	6.57	0.71	9.21	9.61	NA	NA	NA	NA	NA	NA	3.34	2.4	1.39	6.74	1	0	NVE19531	PREDICTED: ribosome-binding protein 1-like isoform 7 [Strongylocentrotus purpuratus]		intronic
scaffold_53	405144	405462	scaffold_53_405303	3	3.57	3.49	21.88	Peak_2475	248.46	5.02	0.31	16.29	18.1	4.68	0.23	20.77	60	Peak_850	345.54	14.95	0.17	89.06	37.68	16.74	0.18	93.12	60	Peak_1130	323.99	10.51	0.27	38.73	71.26	10.04	0.27	37.35	60	1	0	NVE19762	goosecoid	yes		yes
scaffold_53	405756	406074	scaffold_53_405915	3	2.38	1.18	26.82	Peak_6431	145.27	3.14	0.29	10.95	15.73	2.96	0.29	10.37	59.98	Peak_3283	154.2	6.75	0.32	21.11	24.22	7.05	0.46	15.43	60	Peak_4176	159.32	5.13	0.05	98.74	57.88	4.84	0.05	93.25	59.6	1	0	NVE19762	goosecoid			yes
scaffold_53	406040	406358	scaffold_53_406199	2	1.59	0.4	5.59	Peak_11774	93.96	2.32	1.09	2.14	13.09	2.17	1.08	2.01	59.33	Peak_7694	109.61	3.7	0.18	20.42	50.17	3.45	0.18	18.97	59.71	NA	NA	NA	NA	NA	NA	2.32	0.97	2.39	60	1	0	NVE19762	goosecoid	yes		yes
scaffold_53	623274	623592	scaffold_53_623433	2	3.29	1.38	1.95	Peak_13003	87.36	2.22	0.54	4.1	12.51	2.09	0.55	3.83	11.41	Peak_4085	133.14	6.03	0.55	10.96	22.95	6.88	0.82	8.44	12.44	NA	NA	NA	NA	NA	NA	4.37	2.35	1.86	10.12	1	0	NVE19779	gamma-aminobutyric acid type B receptor subunit 2-like [Exaiptasia pallida]		intronic
scaffold_55	33745	34063	scaffold_55_33904	2	4.66	1.15	3.12	Peak_6491	93.21	4.64	0.36	12.97	20.65	5.08	0.36	14.17	9.76	Peak_10139	89.08	3.2	0.87	3.66	47.09	2.98	0.85	3.5	8.54	NA	NA	NA	NA	NA	NA	1.09	0.15	7.43	8.39	1	0	NVE20085	disintegrin and metalloproteinase domain-containing protein 9		Peak located upstream of NVE20084 and downstream of NVE20085. Peak reassigned from NVE20084 since NVE20085 is strongly affected by BMP2/4 KD and NVE20084 is not (also no NV2 model)
scaffold_55	572461	572779	scaffold_55_572620	3	2.42	0.75	2.85	Peak_17259	71.35	1.99	0.34	5.84	10.82	1.83	0.34	5.36	60	Peak_8041	77.41	4.13	0.78	5.27	19.42	4.41	0.8	5.54	60	Peak_9145	96.64	3.37	0.25	13.29	48.17	3.11	0.22	13.98	60	1	0	NVE20145	BTB/POZ domain-containing protein 16-like [Exaiptasia pallida]	yes	Alternative target with confirmed BMP-dependent expression: LBX NVE20146 (=NV2t017667001.1) see https://doi.org/10.1016/j.cub.2023.05.044	yes
scaffold_57	759642	759960	scaffold_57_759801	3	2.03	0.73	4.65	Peak_8840	116.58	2.67	1.04	2.56	14.36	2.45	0.97	2.53	59.78	Peak_6736	90.17	4.54	0.27	17.05	20.45	4.96	0.27	18.51	59.69	Peak_7368	113	3.8	0.3	12.56	50.59	3.58	0.29	12.17	59.88	1	0	NVE20500	trissin receptor-like [Exaiptasia pallida]	yes		yes
scaffold_572	41858	42176	scaffold_572_42017	2	2.08	0.95	5.71	Peak_5931	152.92	3.27	0.85	3.84	15.9	2.98	0.75	3.98	27.66	Peak_4269	128.64	5.87	0.3	19.88	22.77	6.19	0.3	20.67	28.82	NA	NA	NA	NA	NA	NA	5.14	1.65	3.12	24.95	1	0	NVE20548	cytochrome P450 3A24-like [Stylophora pistillata]
scaffold_58	1033492	1033810	scaffold_58_1033651	3	1.19	0.35	6.05	Peak_1334	332.53	6.72	0.56	11.94	19.59	6.36	0.53	12.08	59.95	Peak_3726	142.38	6.34	0.75	8.46	23.55	6.95	0.73	9.5	59.98	Peak_1966	240.73	7.74	0.26	29.33	66.34	7.57	0.26	28.79	59.89	1	0	NVE20684	Gbx	yes		yes
scaffold_58	466592	466910	scaffold_58_466751	3	3.48	1.15	2.4	Peak_27091	46.34	1.73	0.69	2.5	8.4	1.61	0.66	2.45	3.43	Peak_5830	101.48	4.93	0.48	10.25	21.28	5.6	0.59	9.53	4.12	Peak_7539	111.2	3.79	1.75	2.17	50.33	3.55	1.62	2.2	2.39	1	0	NVE20630	FoxA
scaffold_58	467382	467700	scaffold_58_467541	2	4.51	1.06	3.47	Peak_7558	81.78	4.26	0.26	16.26	19.77	4.72	0.36	13.19	3.72	Peak_9091	97.1	3.41	1.46	2.33	48.25	3.14	1.37	2.29	2.7	NA	NA	NA	NA	NA	NA	1.05	0.31	3.35	3.89	1	0	NVE20630	FoxA
scaffold_6	704612	704930	scaffold_6_704771	2	2.73	0.94	11.33	Peak_5297	109.12	5.19	0.14	37.51	21.78	5.11	0.14	36.95	7.42	Peak_17668	56.08	3.46	0.73	4.75	39.36	3.27	0.71	4.59	7.21	NA	NA	NA	NA	NA	NA	1.87	1.22	1.53	5.4	1	0	NVE20952	PREDICTED: UDP-GalNAc:beta-1,3-N-acetylgalactosaminyltransferase 1-like [Acropora digitifera]
scaffold_60	452013	452331	scaffold_60_452172	2	1.6	0.43	3.4	Peak_3605	204.89	4.22	1.04	4.07	17.62	3.94	1.03	3.84	59.92	Peak_8463	102.72	3.52	0.22	15.97	49.04	3.33	0.22	15.36	59.97	NA	NA	NA	NA	NA	NA	2.47	0.33	7.4	60	1	0	NVE21124	transducin-like enhancer protein 1, partial [Exaiptasia pallida]	yes
scaffold_61	674807	675125	scaffold_61_674966	3	2.64	0.8	4.69	Peak_23211	55.56	1.81	0.69	2.63	9.13	1.69	0.69	2.47	60	Peak_8344	74.48	4.03	0.14	28.4	19.24	4.45	0.24	18.72	60	Peak_10791	85.1	3.08	0.27	11.61	46.33	2.87	0.26	11.07	59.83	1	0	NVE21279	HoxD	yes
scaffold_64	441631	441949	scaffold_64_441790	3	1.61	0.7	1.35	Peak_3958	194.4	4.03	0.63	6.4	17.47	3.81	0.59	6.43	60	Peak_4259	128.82	5.88	0.47	12.5	22.82	6.14	0.58	10.61	60	Peak_5257	139.57	4.56	0.43	10.72	54.91	4.41	0.43	10.33	59.92	1	0	NVE21618	Irx			yes
scaffold_65	185211	185529	scaffold_65_185370	2	2.69	0.98	2.85	Peak_6063	98.59	4.82	0.4	11.99	21.01	5.19	0.52	9.98	31.87	Peak_10954	84.14	3.09	1.31	2.35	46.14	2.77	1.29	2.14	28.4	NA	NA	NA	NA	NA	NA	1.93	2.23	0.86	32.99	1	0	NVE21736			alternative target NVE21735
scaffold_65	185739	186057	scaffold_65_185898	2	3.37	1.58	3.69	Peak_3348	152.3	6.68	0.51	13.23	24.18	7.78	0.59	13.19	6.26	Peak_4376	155.35	5.05	1.85	2.73	57.27	4.77	1.73	2.75	6.82	NA	NA	NA	NA	NA	NA	2.31	1.48	1.56	5.64	1	0	NVE21736			alternative target NVE21735
scaffold_66	132985	133303	scaffold_66_133144	2	1.15	0.12	2.88	Peak_5352	163.12	3.44	0.31	11.23	16.28	3.19	0.3	10.55	8.88	Peak_27266	11.57	2.68	0.88	3.05	11.32	2.97	1.02	2.91	7.48	NA	NA	NA	NA	NA	NA	2.78	2.35	1.18	7	1	0	NVE21856	anoctamin-4-like isoform X1 [Orbicella faveolata]
scaffold_66	219724	220042	scaffold_66_219883	3	1.98	0.67	2.72	Peak_10125	105.66	2.5	0.69	3.63	13.76	2.34	0.68	3.42	52.14	Peak_7125	86.13	4.4	0.32	13.65	20.17	4.63	0.36	12.73	52.2	Peak_9527	93.43	3.29	0.46	7.23	47.75	3.13	0.46	6.87	52.14	1	0	NVE21866			alternative target NVE21865	yes
scaffold_66	222292	222610	scaffold_66_222451	3	3.86	1.55	5.37	Peak_20973	61.07	1.87	0.14	13.46	9.65	1.75	0.14	12.73	28.32	Peak_3902	137.71	6.19	0.24	25.41	23.29	6.77	0.27	24.71	26.15	Peak_13748	70.4	2.77	0.48	5.77	43.18	2.61	0.41	6.39	24.41	1	0	NVE21866			alternative target NVE21865
scaffold_66	226109	226427	scaffold_66_226268	2	5.53	1.04	8.27	Peak_7458	82.74	4.29	0.14	30.98	19.89	4.38	0.14	31.68	20.51	Peak_10240	88.4	3.17	0.37	8.47	46.98	2.95	0.36	8.12	23.25	NA	NA	NA	NA	NA	NA	0.79	0.14	5.8	23.58	1	0	NVE21866			alternative target NVE21865
scaffold_66	235395	235713	scaffold_66_235554	3	1.93	1.3	4.26	Peak_2387	253.36	5.12	0.65	7.85	18.06	4.83	0.63	7.72	59.94	Peak_2090	203.52	8.68	0.31	27.76	27.91	9.31	0.41	22.44	59.7	Peak_2400	216.83	7	0.57	12.25	64.36	6.76	0.47	14.29	60	1	0	NVE21868			wrong model_discarded, peak belongs to NVE21867 (ski)	yes
scaffold_67	508733	509051	scaffold_67_508892	2	2.73	1.07	4.03	Peak_12440	90.14	2.25	0.16	14.38	12.82	2.14	0.15	14.1	14.86	Peak_4944	115.34	5.45	1.63	3.34	22.19	5.85	1.72	3.41	14.84	NA	NA	NA	NA	NA	NA	4.13	4.24	0.97	14.94	1	0	NVE22016	testis-expressed protein 26-like isoform X1 [Stylophora pistillata]		intronic
scaffold_69	940048	940366	scaffold_69_940207	3	1.48	0.44	2.54	Peak_5814	154.75	3.3	0.59	5.62	15.87	3.04	0.56	5.48	60	Peak_6947	87.97	4.47	0.24	18.24	20.26	4.5	0.33	13.55	60	Peak_8048	106.43	3.62	0.53	6.77	49.67	3.42	0.53	6.49	59.83	1	0	NVE22317	PREDICTED: phosphoenolpyruvate carboxykinase, cytosolic [GTP]-like [Monodelphis domestica]
scaffold_7	1321816	1322134	scaffold_7_1321975	3	1.83	0.73	3.05	Peak_7945	125.51	2.82	0.65	4.32	14.94	2.66	0.64	4.16	59	Peak_6093	98.2	4.81	0.31	15.29	21.01	4.87	0.33	14.72	59.24	Peak_12988	73.8	2.83	0.34	8.22	43.96	2.72	0.3	9.07	58.29	1	0	NVE22476	ubiquitin/40S ribosomal protein S27a fusion protein [Argas monolakensis]
scaffold_7	48017	48335	scaffold_7_48176	3	2.06	0.62	4.21	Peak_14558	80.81	2.12	0.97	2.19	11.83	2.02	0.93	2.16	59.79	Peak_9242	67.47	3.86	1.3	2.96	18.75	4.16	1.46	2.84	60	Peak_10216	88.51	3.17	0.21	15.39	47.02	2.99	0.2	15.12	60	1	0	NVE22361	WD repeat-containing protein 26 [Stylophora pistillata]
scaffold_71	522220	522538	scaffold_71_522379	3	1.48	0.46	4.37	Peak_4697	176.01	3.69	0.93	3.97	16.75	3.34	0.89	3.73	60	Peak_8644	71.92	3.99	1.21	3.28	19.12	4.19	1.28	3.27	60	Peak_4026	163.05	5.26	0.33	16.13	58.28	4.92	0.3	16.61	60	1	0	NVE22735	chordin			yes
scaffold_71	552570	552888	scaffold_71_552729	2	3.59	0.95	3.55	Peak_8955	69.42	3.89	0.44	8.89	18.89	4.5	0.46	9.68	29.87	Peak_7829	108.4	3.67	0.32	11.36	49.98	3.38	0.26	13.21	24.24	NA	NA	NA	NA	NA	NA	1.25	1	1.26	21.85	1	0	NVE22738	contactin-1a-like		intronic
scaffold_71	784367	784685	scaffold_71_784526	2	2.76	1.23	3.25	Peak_4126	132.18	5.99	0.38	15.78	22.92	6.67	0.43	15.49	60	Peak_4067	162.03	5.23	0.52	10.03	58.18	4.94	0.5	9.83	59.96	NA	NA	NA	NA	NA	NA	2.41	0.57	4.25	59.94	1	0	NVE22756	p63
scaffold_72	254083	254401	scaffold_72_254242	3	1.19	0.17	18	Peak_6781	140.32	3.06	0.77	3.96	15.45	2.86	0.74	3.89	60	Peak_27920	10.73	2.66	0.76	3.48	11.15	2.83	0.94	3.01	60	Peak_8557	101.74	3.49	0.06	58.13	48.92	3.36	0.06	57.44	60	1	0	NVE22860	BMPRII
scaffold_72	754957	755275	scaffold_72_755116	2	3.44	1.04	3.32	Peak_6688	90.79	4.56	0.41	11.1	20.49	4.98	0.42	11.92	13.08	Peak_12282	77.13	2.92	1.19	2.46	44.69	2.63	1.16	2.27	18.06	NA	NA	NA	NA	NA	NA	1.45	0.85	1.69	9.1	1	0	NVE22887	cilia- and flagella-associated protein 65-like isoform X1 [Exaiptasia pallida]		intronic
scaffold_74	298370	298688	scaffold_74_298529	2	2.91	1.86	4.27	Peak_5111	167.46	3.53	0.65	5.46	16.45	3.2	0.6	5.36	1.38	Peak_2777	172.39	7.47	0.48	15.57	25.47	7.98	0.52	15.48	2.31	NA	NA	NA	NA	NA	NA	9.33	8.79	1.06	1.99	1	0	NVE23152	malate dehydrogenase 1 [Ochotona curzoniae]
scaffold_76	911122	911440	scaffold_76_911281	3	1.64	0.42	2.77	Peak_10717	100.97	2.42	0.2	12.27	13.54	2.26	0.19	11.79	20.67	Peak_11241	55.75	3.55	0.65	5.5	17.68	3.7	0.68	5.46	24.16	Peak_10736	85.42	3.12	1.19	2.63	46.38	2.77	1.16	2.39	23.56	1	0	NVE23474	dystonin-like isoform X3 [Exaiptasia pallida]
scaffold_77	14389	14707	scaffold_77_14548	3	2.45	1.01	6.41	Peak_10782	100.48	2.42	0.91	2.66	13.49	2.37	0.88	2.7	29.06	Peak_4644	120.55	5.58	0.14	40.34	22.42	5.82	0.24	24.22	31.98	Peak_5188	140.73	4.59	0.52	8.85	55.06	4.55	0.52	8.71	24.73	1	0	NVE23528	potassium voltage-gated channel subfamily G member 1-like [Stylophora pistillata]	yes	intronic
scaffold_77	274463	274781	scaffold_77_274622	3	3.18	1.68	2.75	Peak_8120	123.81	2.79	1.03	2.72	14.78	2.66	0.97	2.73	25.61	Peak_2836	170.12	7.38	0.54	13.6	25.27	8.46	0.8	10.62	27.02	Peak_3422	178.72	5.83	2.76	2.12	60.17	5.54	2.67	2.07	24.23	1	0	NVE23558	bifunctional arginine demethylase and lysyl-hydroxylase JMJD6-like [Stylophora pistillata]
scaffold_77	278986	279304	scaffold_77_279145	3	2.13	0.84	5.32	Peak_8272	122.53	2.77	1.14	2.44	14.71	2.57	1.06	2.43	49.65	Peak_5479	106.44	5.09	0.17	29.82	21.54	5.47	0.27	20.24	40.14	Peak_5403	137.69	4.52	0.6	7.5	54.54	4.27	0.59	7.26	44.73	1	0	NVE23559	poly [ADP-ribose] polymerase 12-like [Exaiptasia pallida]			yes
scaffold_80	591555	591873	scaffold_80_591714	3	2.11	0.62	3.29	Peak_15473	77.32	2.07	0.42	4.93	11.48	1.95	0.4	4.84	40	Peak_9149	68.08	3.86	0.8	4.84	18.83	4.11	0.94	4.37	44.75	Peak_10883	84.54	3.07	0.24	12.84	46.22	2.93	0.2	14.46	40.59	1	0	NVE24186	Angiopoietin-4 [Exaiptasia pallida]
scaffold_81	71071	71389	scaffold_81_71230	3	2.57	2.47	7.48	Peak_1987	277.41	5.62	1.1	5.11	18.06	5.38	1.06	5.07	59.92	Peak_1032	311.41	13.17	0.51	25.97	35.3	13.81	0.5	27.81	60	Peak_1596	268.65	8.65	0.32	27.47	68.5	8.31	0.31	27.2	59.96	1	0	NVE24266	achaete-scute B [Nematostella vectensis]			yes
scaffold_81	74648	74966	scaffold_81_74807	3	1.57	0.79	10.58	Peak_2289	259.11	5.25	1.17	4.49	18.05	4.8	1.15	4.17	59.99	Peak_3526	147.29	6.5	0.18	37.11	23.83	7.55	0.19	39.92	60	Peak_2531	210.02	6.79	0.42	16	63.81	6.25	0.42	15.04	59.89	1	0	NVE24266	achaete-scute B [Nematostella vectensis]
scaffold_84	780949	781267	scaffold_84_781108	3	1.54	0.37	1.78	Peak_10252	104.53	2.48	0.46	5.4	13.73	2.34	0.46	5.1	60	Peak_12128	51.05	3.44	0.46	7.46	17.21	3.6	0.55	6.51	60	Peak_9803	91.52	3.24	0.29	11.31	47.43	3.11	0.28	11.01	60	1	0	NVE24654			intronic	yes
scaffold_88	23523	23841	scaffold_88_23682	2	4.39	1.75	4.07	Peak_22614	57.03	1.83	0.4	4.57	9.28	1.69	0.4	4.25	3.13	Peak_3612	144.87	6.43	0.48	13.47	23.8	7.44	0.52	14.37	5.82	NA	NA	NA	NA	NA	NA	2.89	3.56	0.81	4.76	1	0	NVE24941	PREDICTED: zinc metalloproteinase nas-13-like [Hydra vulgaris]		intronic
scaffold_9	1500000	1500318	scaffold_9_1500159	3	2.4	1.06	2.16	Peak_8216	122.93	2.77	0.77	3.62	14.75	2.57	0.7	3.67	60	Peak_4220	129.69	5.92	0.96	6.15	22.85	6.17	1.2	5.16	60	Peak_6840	118.66	3.97	0.35	11.32	51.4	3.76	0.35	10.76	59.19	1	0	NVE25316	ZnF protein with a SWIM domain	yes		yes
scaffold_9	1503618	1503936	scaffold_9_1503777	3	2.15	4.53	8.97	Peak_299	714.9	14.13	0.49	28.92	30.3	13.66	0.48	28.75	60	Peak_259	688.95	28.54	0.46	62.34	44.3	29.34	0.5	58.49	59.96	Peak_240	664.72	22.39	0.61	36.46	82.43	21.88	0.61	35.81	59.99	1	0	NVE25316	ZnF protein with a SWIM domain	yes	intronic	yes
scaffold_9	1503927	1504245	scaffold_9_1504086	2	1.52	1.28	10.96	Peak_1338	263.23	11.34	0.63	18.02	32.49	11.28	0.67	16.91	60	Peak_737	402.59	13.16	0.34	38.38	74.44	12.82	0.31	41.92	59.95	NA	NA	NA	NA	NA	NA	8.46	1.8	4.69	60	1	0	NVE25316	ZnF protein with a SWIM domain	yes	intronic	yes
scaffold_9	1504211	1504529	scaffold_9_1504370	3	1.46	1.75	5.8	Peak_326	688.47	13.67	1.22	11.18	29.59	12.88	1.1	11.72	60	Peak_734	377.41	16.5	0.91	18.04	39.14	18.85	0.95	19.81	59.96	Peak_389	537.18	17.71	0.56	31.75	79.06	16.8	0.53	31.71	60	1	0	NVE25316	ZnF protein with a SWIM domain	yes	intronic	yes
scaffold_9	1504548	1504866	scaffold_9_1504707	2	1.27	0.51	6.7	Peak_3102	160.05	6.98	0.26	27.19	24.8	7.53	0.27	27.9	60	Peak_1593	268.7	8.68	0.61	14.32	68.54	8.22	0.58	14.28	59.98	NA	NA	NA	NA	NA	NA	6.48	1.35	4.81	59.98	1	0	NVE25316	ZnF protein with a SWIM domain		intronic	yes
scaffold_9	1505511	1505829	scaffold_9_1505670	2	1.64	0.38	2.94	Peak_7118	135.76	2.99	0.96	3.12	15.34	2.81	0.94	3	59.97	Peak_8578	101.57	3.49	0.27	13.17	48.9	3.28	0.26	12.59	60	NA	NA	NA	NA	NA	NA	1.99	0.41	4.82	60	1	0	NVE25316	ZnF protein with a SWIM domain	yes	intronic
scaffold_9	1506665	1506983	scaffold_9_1506824	3	1.76	1.36	11.09	Peak_1694	299.12	6.02	1.15	5.22	18.83	5.69	1.03	5.49	59.95	Peak_1692	228.83	9.83	0.14	70.68	30.4	9.99	0.23	43.89	59.85	Peak_1285	300.15	9.76	0.44	22.38	70.47	9.49	0.36	26.02	59.97	1	0	NVE25316	ZnF protein with a SWIM domain	yes	intronic	yes
scaffold_9	1507465	1507783	scaffold_9_1507624	2	1.34	0.3	5.3	Peak_3321	213.55	4.38	0.75	5.87	17.76	4.13	0.65	6.39	60	Peak_7446	112.2	3.77	0.16	23.61	50.45	3.53	0.15	23.29	60	NA	NA	NA	NA	NA	NA	3.08	0.36	8.62	60	1	0	NVE25316	ZnF protein with a SWIM domain		intronic	yes
scaffold_9	1508274	1508592	scaffold_9_1508433	2	1.22	0.15	2.96	Peak_10981	98.93	2.4	1.12	2.14	13.44	2.25	1.04	2.17	60	Peak_11738	80.04	2.96	0.25	11.91	45.26	2.73	0.24	11.38	59.87	NA	NA	NA	NA	NA	NA	2.66	0.93	2.86	60	1	0	NVE25316	ZnF protein with a SWIM domain		intronic
scaffold_9	1508687	1509005	scaffold_9_1508846	3	2.38	5.87	6.46	Peak_272	751.72	14.86	1.35	11.05	30.61	14.24	1.12	12.75	60	Peak_206	801.84	32.13	0.86	37.37	43.09	33.97	0.97	35.13	60	Peak_272	619.61	20.9	0.86	24.25	81.72	19.87	0.85	23.45	60	1	0	NVE25316	ZnF protein with a SWIM domain	yes	intronic	yes
scaffold_9	1556798	1557116	scaffold_9_1556957	3	1.71	0.45	5.97	Peak_11171	97.61	2.37	0.49	4.87	13.36	2.17	0.46	4.7	60	Peak_11581	53.88	3.49	0.14	24.31	17.51	3.72	0.15	25	60	Peak_8146	105.55	3.6	0.28	12.84	49.56	3.21	0.28	11.44	59.8	1	0	NVE25322	pleckstrin homology domain-containing family A member 2-like [Orbicella faveolata]
scaffold_9	530926	531244	scaffold_9_531085	2	1.56	0.24	3.84	Peak_13592	84.75	2.17	0.17	12.79	12.27	2.02	0.17	12.21	60	Peak_27166	28.98	2.23	0.16	13.74	32.49	2.04	0.13	15.84	60	NA	NA	NA	NA	NA	NA	1.31	0.44	2.95	60	1	0	NVE25227	Patched (3' peak)	yes
scaffold_91	733161	733479	scaffold_91_733320	2	2.29	0.82	3.89	Peak_6949	87.97	4.47	0.3	14.8	20.25	4.91	0.37	13.42	25.06	Peak_5976	129.14	4.33	2.16	2	53.06	4.04	1.88	2.15	24.48	NA	NA	NA	NA	NA	NA	2.14	1.51	1.42	19.61	1	0	NVE25496	Polycystic kidney disease protein 1-like 2 [Exaiptasia pallida]		intronic
scaffold_92	108358	108676	scaffold_92_108517	3	1.18	0.23	8.1	Peak_2622	241.35	4.9	0.78	6.31	18.29	4.66	0.67	6.91	60	Peak_7029	87.18	4.44	0.14	32.03	20.22	4.75	0.14	34.13	59.93	Peak_6171	126.6	4.2	0.29	14.39	52.62	4.03	0.27	14.7	60	1	0	NVE25540	DNA-directed RNA polymerase II subunit RPB1-like [Exaiptasia pallida]
scaffold_92	54066	54384	scaffold_92_54225	2	2.23	0.59	6.39	Peak_12321	50.05	3.42	0.14	24.65	17.1	3.66	0.14	26.3	60	Peak_9826	91.37	3.23	0.2	16.45	47.39	2.97	0.19	15.88	60	NA	NA	NA	NA	NA	NA	1.65	0.39	4.17	59.94	1	0	NVE25536	Ets domain transcription factor ERG [Nematostella vectensis]			yes
scaffold_92	60111	60429	scaffold_92_60270	2	1.82	0.77	4.74	Peak_5340	108.61	5.21	1.28	4.07	21.69	5.67	1.38	4.12	60	Peak_6346	124.41	4.12	0.2	20.48	52.22	3.73	0.21	18.08	59.8	NA	NA	NA	NA	NA	NA	3.11	0.87	3.59	60	1	0	NVE25536	Ets domain transcription factor ERG [Nematostella vectensis]			yes
scaffold_92	60773	61091	scaffold_92_60932	3	1.68	1.07	4.64	Peak_2119	269.55	5.47	1.36	4.03	18	5.2	1.26	4.13	59.96	Peak_2320	190.92	8.21	0.4	20.49	26.95	8.74	0.43	20.18	59.75	Peak_1810	252.39	8.16	0.64	12.78	67.2	7.93	0.62	12.75	59.9	1	0	NVE25536	Ets domain transcription factor ERG [Nematostella vectensis]
scaffold_92	68076	68394	scaffold_92_68235	3	1.69	0.62	9.62	Peak_5949	152.58	3.26	0.39	8.33	15.89	3.06	0.38	7.97	60	Peak_6391	94.41	4.67	0.14	33.64	20.76	5.18	0.14	37.03	60	Peak_6353	124.3	4.12	0.11	36.54	52.21	3.87	0.11	36.67	59.91	1	0	NVE25536	Ets domain transcription factor ERG [Nematostella vectensis]			yes
scaffold_92	69864	70182	scaffold_92_70023	3	2.11	0.79	3.15	Peak_9037	114.83	2.64	0.85	3.11	14.35	2.46	0.85	2.88	60	Peak_5980	99.81	4.87	0.94	5.21	21.08	5.18	0.94	5.52	60	Peak_7109	115.65	3.88	0.3	12.77	51	3.6	0.27	13.36	60	1	0	NVE25536	Ets domain transcription factor ERG [Nematostella vectensis]
scaffold_94	275581	275899	scaffold_94_275740	2	4.14	1.3	2.58	Peak_4657	120.29	5.58	0.35	16.14	22.4	5.91	0.58	10.18	34.19	Peak_8691	100.6	3.49	1.39	2.52	48.72	3.39	1.33	2.56	30.61	NA	NA	NA	NA	NA	NA	1.43	0.62	2.31	31.52	1	0	NVE25770
scaffold_98	500484	500802	scaffold_98_500643	2	3.66	1.06	7.3	Peak_6557	92.48	4.61	0.2	22.74	20.58	5.04	0.21	23.83	25.11	Peak_9027	97.61	3.43	1.63	2.1	48.37	3.2	1.57	2.04	15.93	NA	NA	NA	NA	NA	NA	1.38	0.76	1.82	25.42	1	0	NVE26097	Segment polarity protein dishevelled-like DVL-3 [Exaiptasia pallida]	yes

## Sheet: LG4dP-targets
Gene (curated)	Curated Blast Hit	Gene annotation	BRE	TF	SignalP	Function	Stage	Remarks
NVE11604	Scribble	SCRIB-like2				signaling	LG4dP
NVE13181	Dual specificity phosphatase 7	dusp7	yes			signaling	LG4dP
NVE13981	Zinc finger protein GLIS3 [Exaiptasia pallida]	glis3	yes	*		TF	LG4dP
NVE15986	Zinc finger protein 503 [Exaiptasia pallida]	nocA		*		TF	LG4dP
NVE16132	Gremlin	gremlin	yes			signaling	LG4dP
NVE16405	Nanos2	nanos2	yes			other	LG4dP
NVE18028	Tiggy-winkle hedgehog protein [Exaiptasia pallida]	hh1	yes		sigP:1^27^0.685^YES	signaling	LG4dP
NVE18982	Kinesin-like protein KIF26B	ki26a	yes			signaling	LG4dP
NVE19435	RNA-dependent RNA polymerase 2 [Exaiptasia pallida]	RDR1-like2	yes			other	LG4dP
NVE19762	Goosecoid	gsc	yes	*		TF	LG4dP
NVE20684	Gbx	Gbx	yes	*		TF	LG4dP
NVE21866	Neurexin-4	NVE21866	yes			neuro	LG4dP
NVE22735	Chordin	chordin	yes		sigP:1^17^0.495^YES	signaling	LG4dP
NVE22860	BMPRII	bmprII	yes		sigP:1^21^0.908^YES	signaling	LG4dP
NVE24266	Achaete-scute B	ashB	yes	*		TF	LG4dP
NVE25227	Patched	ptc	yes			signaling	LG4dP
NVE25316	ZSWIM4-6	zswim4-6	yes			TF	LG4dP
NVE25536	ERG	erg	yes	*		TF	LG4dP
NVE5022	Netrin	netrin	yes		sigP:1^24^0.608^YES	signaling	LG4dP
NVE5479	SMAD1/5	smad1/5	yes	*		TF	LG4dP
NVE6154	Pikachurin-like	pikachurin	yes		sigP:1^24^0.553^YES	neuro	LG4dP
NVE644	Fibronectin type-III domain-containing protein 3A [Exaiptasia pallida]	FND3B-like	yes			other	LG4dP
NVE8199	GATA	gata	yes	*		TF	LG4dP
NVE9239	RNA-binding protein 41-like [Exaiptasia pallida]	RBM41-like	yes			other	LG4dP
NVE10247	PREDICTED: kynurenine--oxoglutarate transaminase 3-like [Amphimedon queenslandica]	KAT3-like				metabolism	LG
NVE10482	OPN4B-like1/opsin [Nematostella vectensis]	OPN4B-like1				neuro	LG
NVE10513	Bifunctional heparan sulfate N-deacetylase/N-sulfotransferase [Exaiptasia pallida]	NDST4-like4				metabolism	LG
NVE10582	Cyclic AMP-dependent transcription factor ATF-6 alpha [Exaiptasia pallida]	ATF6A-like2		*		TF	LG
NVE10856	coagulation factor VIII-like [Exaiptasia pallida]	CNTP2-like2				metabolism	LG
NVE11125	PREDICTED: neuroblast differentiation-associated protein AHNAK-like [Austrofundulus limnaeus]	AHNK-like1				neuro	LG
NVE11345	HoxB/Anthox6a	HoxB-Anthox6a	yes	*		TF	LG
NVE11600	Zinc finger protein 395 [Exaiptasia pallida]	ZN395-like	yes	*		TF	LG
NVE11645		NVE11645	yes		sigP:1^19^0.877^YES	other	LG
NVE12012	Solute carrier family 28 member 3 [Exaiptasia pallida]	NVE12012				metabolism	LG
NVE12941	Tetratricopeptide repeat protein 21B [Exaiptasia pallida]	TT21B-like				other	LG
NVE12998	HoxE/Anthox1a	HoxE/Anthox1a	yes	*		TF	LG
NVE13609	Benzoate carboxyl methyltransferase [Exaiptasia pallida]	MT810-like1				metabolism	LG
NVE13995	RNA-binding E3 ubiquitin-protein ligase MEX3C [Exaiptasia pallida]	mex3b				other	LG
NVE14737	upstream of unknown NVE14378 and downstream of ZnF protein 36, C3H1 type-like 2-B	zf-C3H1	yes	*		TF	LG
NVE14900	Eukaryotic translation initiation factor 2-alpha kinase 4 [Exaiptasia pallida]	E2AK4-like2				metabolism	LG
NVE15111	DDB1- and CUL4-associated factor 6 [Exaiptasia pallida]	DCAF6-like3				metabolism	LG
NVE15117	La-related protein 1 [Exaiptasia pallida]	LARP1-like1		*		TF	LG
NVE15803	OTU domain-containing protein 4-like [Acropora digitifera]	OTUD4-like				metabolism	LG
NVE16106	A disintegrin and metalloproteinase with thrombospondin motifs 9 [Exaiptasia pallida]	ATS9-like2			sigP:1^17^0.743^YES	other	LG
NVE1611	somatostatin receptor type 5 [Nematostella vectensis]	NPFF2-like1				neuro	LG
NVE16340	Dual specificity protein phosphatase 1 [Exaiptasia pallida]	dusp1				signaling	LG
NVE16429	Cathepsin d	ASPP-like				metabolism	LG
NVE18219	unknown protein	ATOH7-like		*		TF	LG
NVE18508	Actin-depolymerizing factor 1 [Exaiptasia pallida]	COFI-like3				metabolism	LG
NVE19673	unknown protein	NVE19673				other	LG
NVE20018	Phosphatidylinositol phosphatase PTPRQ [Exaiptasia pallida]	SDK2-like3				metabolism	LG
NVE20898	Nk5	Nk5		*		TF	LG
NVE21447	unknown protein	NVE21447				other	LG
NVE21766	Tbx2/3	tbx2/3		*		TF	LG
NVE21867	ski oncogene-like [Exaiptasia pallida]	c-ski				signaling	LG
NVE25219	EGF-like repeat and discoidin I-like domain-containing protein 3 [Exaiptasia pallida]	EDIL3-like11				other	LG
NVE3440	unknown protein	CBPC5-like	yes			other	LG
NVE4362	Tbx20.1	tbx20.1	yes	*		TF	LG
NVE5866	unknown protein	NVE5866				other	LG
NVE5937	Ephrin-B2a [Exaiptasia pallida]	EFNB2-like1	yes			signaling	LG
NVE6060	Protein XRP2 [Exaiptasia pallida]	XRP2-like				metabolism	LG
NVE6144	Neurotrypsin [Exaiptasia pallida]	NETR-like3				neuro	LG
NVE6191	Receptor-type tyrosine-protein phosphatase delta [Exaiptasia pallida]	PTPRD-like8	yes			signaling	LG
NVE6383	band 4.1-like protein 2 isoform X2 [Orbicella faveolata]	E41L1-like2	yes			other	LG
NVE647	PREDICTED: centromere-associated protein E-like [Acropora digitifera]	NVE647				metabolism	LG
NVE833	unknown protein	NVE833	yes			other	LG
NVE9641	Muscle, skeletal receptor tyrosine-protein kinase [Exaiptasia pallida]	MUSK-like1	yes			signaling	LG
NVE9938		NVE9938	yes			other	LG
NVE10069	PKHL1-like2/fibrocystin-L-like isoform X1 [Orbicella faveolata]	PKHL1-like2		*		signaling	4dP
NVE10119		NVE10119				other	4dP
NVE1044	THADA-like1/Thyroid adenoma-associated protein-like [Stylophora pistillata]	THADA-like1				signaling	4dP
NVE10444	Islet-1	isl1	yes	*		TF	4dP
NVE10734	PREDICTED: LOW QUALITY PROTEIN: protein disulfide-isomerase A4 [Callithrix jacchus]	PDIA4-like1				other	4dP
NVE10768		NVE10768	yes			other	4dP
NVE10775		NVE10775				other	4dP
NVE10777	Intron-binding protein aquarius [Heterocephalus glaber]	AQR-like4				metabolism	4dP
NVE11067		NA				other	4dP
NVE11119	rho guanine nucleotide exchange factor 12-like isoform X9 [Exaiptasia pallida]	ARHGB-like				signaling	4dP
NVE11182	multidrug resistance-associated protein 1-like [Exaiptasia pallida]	MRP1-like5				metabolism	4dP
NVE11452	bifunctional lysine-specific demethylase and histidyl-hydroxylase MINA-like [Exaiptasia pallida]	MINA-like				other	4dP
NVE11458	PREDICTED: protein OSCP1-like [Acropora digitifera]	OSCP1-like	yes			metabolism	4dP
NVE1152	short transient receptor potential channel 4-associated protein-like [Exaiptasia pallida]	TP4AP-like2				neuro	4dP
NVE11612	sodium/potassium-transporting ATPase subunit beta-1-interacting protein 1-like [Exaiptasia pallida]	nkain				neuro	4dP
NVE11759	very low-density lipoprotein receptor [Culex quinquefasciatus]	LRP2-like4				signaling	4dP
NVE11893	mitochondrial inner membrane protease subunit [Papilio xuthus]	IMP2L-like2				metabolism	4dP
NVE11976	seipin isoform 1 [Macaca mulatta]	BSCL2-like				metabolism	4dP
NVE120		NVE120				other	4dP
NVE12051	translation elongation factor 1 alpha [Nematostella vectensis]	EF1A3-like				metabolism	4dP
NVE12115	solute carrier family 25 member 38-B-like [Exaiptasia pallida]	S238B-like				metabolism	4dP
NVE12329	calmodulin-binding transcription activator 2-like [Exaiptasia pallida]	CMTA1-like		*		TF	4dP
NVE1242	monocarboxylate transporter 10-like isoform X2 [Exaiptasia pallida]	MOT10-like12				metabolism	4dP
NVE12422	UBX domain-containing protein 11 [Exaiptasia pallida]	NVE12422				signaling	4dP
NVE12482	ryncolin-4-like [Exaiptasia pallida]	TENR-like1				other	4dP
NVE12565	ankyrin-3-like isoform X2 [Exaiptasia pallida]	ANK2-like8				neuro	4dP
NVE12739	monocarboxylate transporter 3-like [Exaiptasia pallida]	MOT3-like1				metabolism	4dP
NVE12762	SoxC	soxC		*		TF	4dP
NVE12801	cilia- and flagella-associated protein 47-like [Exaiptasia pallida]	CX030-like1				other	4dP
NVE12909	PREDICTED: protein transport protein Sec61 subunit beta-like [Nasonia vitripennis]	SC61B-like				metabolism	4dP
NVE13000	apoptosis-stimulating of p53 protein 2-like [Exaiptasia pallida]	iaspp	yes			signaling	4dP
NVE13023	acid-sensing ion channel 2-like [Exaiptasia pallida]	ASIC2-like3				neuro	4dP
NVE1303	PREDICTED: similar to Mitochondrial 2-oxoglutarate/malate carrier protein (OGCP) (Solute carrier family 25 member 11) [Ciona intestinalis]	M2OM-like				metabolism	4dP
NVE13306	ankyrin repeat domain-containing protein 50-like [Orbicella faveolata]	NVE13306	yes			metabolism	4dP
NVE1338	Disintegrin and metalloproteinase domain-containing protein 9 [Exaiptasia pallida]	ADAM9-like2	yes			signaling	4dP
NVE13720	Scavenger receptor cysteine-rich type 1 protein M130 [Exaiptasia pallida]	DMBT1-like12				other	4dP
NVE13892	titin-like [Exaiptasia pallida]	TITIN-like10			sigP:1^19^0.791^YES	other	4dP
NVE1390	hemicentin-1-like [Exaiptasia pallida]	hc-1				signaling	4dP
NVE13950	RNA helicase Mov10l1-like [Stylophora pistillata]	M10L1-like2				metabolism	4dP
NVE13996	Conserved oligomeric Golgi complex subunit 1 [Stylophora pistillata]	COG1-like				metabolism	4dP
NVE14035	PREDICTED: N-acetyltransferase 11-like [Saccoglossus kowalevskii]	NAA40-like				metabolism	4dP
NVE14088	PREDICTED: tetratricopeptide repeat domain 1-like [Saccoglossus kowalevskii]	TTC1-like1				other	4dP
NVE14390	acetylcholinesterase-like [Exaiptasia pallida]	NLGNX-like1				neuro	4dP
NVE14577	Axin	axin				signaling	4dP
NVE14619		NVE14619				other	4dP
NVE14738	upstream of unknown and downstream of ZnF protein 36, C3H1 type-like 2-B	NVE14738				TF	4dP
NVE14827	PREDICTED: adenosine 3'-phospho 5'-phosphosulfate transporter 2 [Monodelphis domestica]	S35B3-like				metabolism	4dP
NVE14968	Bicaudal	bicaudal				other	4dP
NVE1563	T-complex protein 1 subunit theta-like [Stylophora pistillata]	TCPQ-like				metabolism	4dP
NVE15644	titin	NVE15644				other	4dP
NVE15735	RGM	rgm			sigP:1^28^0.803^YES	signaling	4dP
NVE15801	fibulin-1-like [Exaiptasia pallida]	FBN3-like3				other	4dP
NVE15826	ankyrin repeat and SOCS box protein 13-like [Exaiptasia pallida]	ANK1-like2				signaling	4dP
NVE16286	AP-5 complex subunit beta-1-like [Exaiptasia pallida]	AP5B1-like				metabolism	4dP
NVE16399	RING finger protein 44 [Camponotus floridanus]	RNF44-like				signaling	4dP
NVE16502		NVE16502				other	4dP
NVE16531	PREDICTED: sodium- and chloride-dependent GABA transporter 1-like [Metaseiulus occidentalis]	SC6A1-like2				neuro	4dP
NVE16537	sodium/hydrogen exchanger 8-like [Stylophora pistillata]	SL9A8-like2				metabolism	4dP
NVE16578	LMX	LMX		*		TF	4dP	NVE16578 and NVE16579 are two incomplete models belonging to the same gene
NVE16701		NVE16701				other	4dP
NVE16748	CDP-diacylglycerol--inositol 3-phosphatidyltransferase-like [Orbicella faveolata]	CDIPT-like2				signaling	4dP
NVE16802	Zinc finger protein 238 [Larimichthys crocea]	ZBT18-like		*		TF	4dP
NVE16829	Acid-sensing ion channel 4 [Exaiptasia pallida]	UNC8-like				neuro	4dP
NVE17057	neurexin-4-like [Orbicella faveolata]	CNTP2-like3				neuro	4dP
NVE17090		NVE17090				other	4dP
NVE17171	PREDICTED: similar to mosaic eyes [Hydra magnipapillata]	NVE17171				neuro	4dP
NVE1724	PREDICTED: glycine N-acyltransferase-like protein 3-like [Saccoglossus kowalevskii]	GLYAT-like				metabolism	4dP
NVE17321	Mitochondrial sodium/hydrogen exchanger 9B2 [Exaiptasia pallida]	SL9B2-like2				metabolism	4dP
NVE17501	protein disulfide-isomerase, partial [Clonorchis sinensis]	NVE17501				metabolism	4dP
NVE17573		NVE17573	yes		sigP:1^24^0.7^YES	other	4dP
NVE17589	sec14 cytosolic factor-like [Exaiptasia pallida]	SEC14-like				metabolism	4dP
NVE17630		NVE17630				other	4dP
NVE17760	tyrosine-protein phosphatase non-receptor type 13-like isoform X2 [Orbicella faveolata]	PTN13-like1				signaling	4dP
NVE17802	receptor-type tyrosine-protein phosphatase epsilon-like [Exaiptasia pallida]	PTPRA-like3				signaling	4dP
NVE17934	Kinesin light chain [Stylophora pistillata]	CED3-like				metabolism	4dP
NVE17939	PREDICTED: perilipin-2 isoform X4 [Strongylocentrotus purpuratus]	LSD2-like				metabolism	4dP
NVE18029		NVE18030				other	4dP
NVE18033	biogenesis of lysosome-related organelles complex 1 subunit 1-like [Orbicella faveolata]	BL1S1-like				metabolism	4dP
NVE18272	protein BTG2-like [Orbicella faveolata]	BTG1-like1				neuro	4dP
NVE18472	Lhx9	LHX9-like				TF	4dP
NVE18613		NDK7-like2				other	4dP
NVE18683	Hes2, partial [Nematostella vectensis]	hes2		*		TF	4dP
NVE18684	PREDICTED: conserved oligomeric Golgi complex subunit 5-like [Strongylocentrotus purpuratus]	COG5-like				metabolism	4dP
NVE18717	probable signal peptidase complex subunit 2 [Exaiptasia pallida]	SPCS2-like1				metabolism	4dP
NVE18726	Neuropilin-2 [Stylophora pistillata]	MFGM-like27				neuro	4dP
NVE18768	PREDICTED: LOW QUALITY PROTEIN: voltage-dependent calcium channel type A subunit alpha-1 [Nasonia vitripennis]	CAC1A-like3				neuro	4dP
NVE1883	PREDICTED: macrophage mannose receptor 1-like [Oreochromis niloticus]	MRC2-like3				metabolism	4dP
NVE18878	multidrug resistance protein 1-like [Exaiptasia pallida]	MDR1-like2				metabolism	4dP
NVE1907	protein Tob2-like [Exaiptasia pallida]	tob2				signaling	4dP
NVE19105	ectonucleotide pyrophosphatase/phosphodiesterase family member 5-like isoform X1 [Exaiptasia pallida]	ENPP4-like1			sigP:1^23^0.555^YES	neuro	4dP
NVE19233	follicle-stimulating hormone receptor-like isoform X2 [Exaiptasia pallida]	NvLGR4-5-like3	yes			signaling	4dP
NVE19380	sideroflexin-5-like [Stylophora pistillata]	SFXN5-like2				other	4dP
NVE19409	dopamine D2-like receptor [Orbicella faveolata]	DRD1L-like1				neuro	4dP
NVE19437	Fibroblast growth factor 8-17-like [Nematostella vectensis]	NvFgf8-17-like			sigP:1^21^0.587^YES	signaling	4dP
NVE19531	PREDICTED: ribosome-binding protein 1-like isoform 7 [Strongylocentrotus purpuratus]	RRBP1-like7				metabolism	4dP
NVE19779	gamma-aminobutyric acid type B receptor subunit 2-like [Exaiptasia pallida]	GABR2-like3				neuro	4dP
NVE20084		MLP-like2				other	4dP
NVE20145	BTB/POZ domain-containing protein 16-like [Exaiptasia pallida]	BTBDG-like	yes			signaling	4dP
NVE20500	trissin receptor-like [Exaiptasia pallida]	NK3R-like1	yes			signaling	4dP
NVE2054	FGFR1 oncogene partner 2 homolog [Exaiptasia pallida]	FGOP2-like	yes			signaling	4dP
NVE20548	FGFR1 oncogene partner 2	CP341-like3			sigP:1^21^0.57^YES	signaling	4dP
NVE20630	FoxA	foxA		*		TF	4dP
NVE20952	PREDICTED: UDP-GalNAc:beta-1,3-N-acetylgalactosaminyltransferase 1-like [Acropora digitifera]	B3GN6-like				metabolism	4dP
NVE21124	transducin-like enhancer protein 1, partial [Exaiptasia pallida]	groucho	yes			signaling	4dP
NVE21279	HoxD/Anthox8	HoxDb	yes	*		TF	4dP
NVE2141	A007-G11 G-protein coupled receptor [Acropora millepora]	HRH2-like11				signaling	4dP
NVE21618	Irx	irx		*		TF	4dP
NVE21736		NVE21736				other	4dP
NVE21856	anoctamin-4-like isoform X1 [Orbicella faveolata]	ANO4-like4				metabolism	4dP
NVE22016	testis-expressed protein 26-like isoform X1 [Stylophora pistillata]	NVE22016				other	4dP
NVE22317	PREDICTED: phosphoenolpyruvate carboxykinase, cytosolic [GTP]-like [Monodelphis domestica]	PCKGM-like1				other	4dP
NVE22361	WD repeat-containing protein 26 [Stylophora pistillata]	WDR26-like				other	4dP
NVE22476	ubiquitin/40S ribosomal protein S27a fusion protein [Argas monolakensis]	RS27A-like				metabolism	4dP
NVE22738	contactin-1a-like	CNTN3-like3			sigP:1^24^0.773^YES	signaling	4dP
NVE22756	p63	p63		*		TF	4dP
NVE22887	cilia- and flagella-associated protein 65-like isoform X1 [Exaiptasia pallida]	CC108-like6				other	4dP
NVE23152	malate dehydrogenase 1 [Ochotona curzoniae]	MDHC-like				metabolism	4dP
NVE23474	dystonin-like isoform X3 [Exaiptasia pallida]	UTRO-like3				metabolism	4dP
NVE23528	potassium voltage-gated channel subfamily G member 1-like [Stylophora pistillata]	NVE23528	yes			neuro	4dP
NVE23558	bifunctional arginine demethylase and lysyl-hydroxylase JMJD6-like [Stylophora pistillata]	JMJD6-like2				metabolism	4dP
NVE23559	poly [ADP-ribose] polymerase 12-like [Exaiptasia pallida]	PAR12-like1		*		metabolism	4dP
NVE2417	bone morphogenetic protein 1-like isoform X2 [Exaiptasia pallida]	ASTL-like				signaling	4dP
NVE24186	Angiopoietin-4 [Exaiptasia pallida]	NVE24186				other	4dP
NVE24654		CR063-like				other	4dP
NVE24941	PREDICTED: zinc metalloproteinase nas-13-like [Hydra vulgaris]	TYR3-like5			sigP:1^20^0.833^YES	signaling	4dP
NVE25322	pleckstrin homology domain-containing family A member 2-like [Orbicella faveolata]	SECG-like3				other	4dP
NVE25496	Polycystic kidney disease protein 1-like 2 [Exaiptasia pallida]	PK1L2-like11				neuro	4dP
NVE25540	DNA-directed RNA polymerase II subunit RPB1-like [Exaiptasia pallida]	RPB1-like3				metabolism	4dP
NVE25770		NVE25770				other	4dP
NVE26097	Dishevelled	dsh	yes	*		signaling	4dP
NVE2617	32,5-bisphosphate nucleotidase 1 [Lepeophtheirus salmonis]	BPNT1-like				metabolism	4dP
NVE2776	PREDICTED: TATA-binding protein-associated factor 172 [Monodelphis domestica]	BTAF1-like2				metabolism	4dP
NVE2817	zinc finger and SCAN domain-containing protein 29-like [Exaiptasia pallida]	NVE2817		*		TF	4dP
NVE2832	dorsal-ventral patterning tolloid-like protein 1 isoform X1 [Exaiptasia pallida]	TLL1-like15			sigP:1^25^0.591^YES	signaling	4dP
NVE3152	complement C1q subcomponent subunit C-like isoform X2 [Exaiptasia pallida]	tnf10				other	4dP
NVE3300	patatin-like phospholipase domain-containing protein 7 isoform X3 [Exaiptasia pallida]	plpl7				metabolism	4dP
NVE3363	uncharacterized protein C6orf62 homolog [Exaiptasia pallida]	CF062-like				other	4dP
NVE3572	Smad4	smad4				TF	4dP
NVE3754	multiple coagulation factor deficiency protein 2 homolog [Exaiptasia pallida]	MCFD2-like2				other	4dP
NVE424	NADP-dependent oxidoreductase domain-containing protein 1-like [Exaiptasia pallida]	NXRD1-like	yes			metabolism	4dP
NVE4284		NVE4284				other	4dP
NVE4307	lamin-L(I)-like [Exaiptasia pallida]	LAML1-like				other	4dP
NVE4371	PREDICTED: similar to Protein Shroom4 [Hydra magnipapillata]	SHRM3-like				signaling	4dP
NVE4509	zinc metalloproteinase-disintegrin-like BjussuMP-1 [Exaiptasia pallida]	ADA28-like1				other	4dP
NVE4746	E3 ubiquitin-protein ligase RNF213 [Exaiptasia pallida]	rn213				signaling	4dP
NVE4771	116 kDa U5 small nuclear ribonucleoprotein component-like [Stylophora pistillata]	U5S1-like2				metabolism	4dP
NVE4825	Phthiocerol synthesis polyketide synthase type I PpsC [Exaiptasia pallida]	PHAS-like				metabolism	4dP
NVE4852	protein BUD31 homolog [Exaiptasia pallida]	BUD31-like				other	4dP
NVE4973	WD repeat-containing protein 11-like [Orbicella faveolata]	WDR11-like				other	4dP
NVE5059	scalloped [Thermobia domestica]	tead1		*		TF	4dP
NVE5080	EGF and laminin G domain-containing protein-like [Exaiptasia pallida]	ELP-like2			sigP:1^21^0.894^YES	signaling	4dP
NVE5217	Cathepsin L1 [Stylophora pistillata]	DCDA-like				metabolism	4dP
NVE531	Snaclec 5 [Exaiptasia pallida]	PGCA-like1			sigP:1^17^0.868^YES	other	4dP
NVE5426	guanylate cyclase soluble subunit beta-1-like [Exaiptasia pallida]	GCYB1-like2				signaling	4dP
NVE558	mitochondrial ubiquitin ligase activator of NFKB 1-like isoform X2 [Orbicella faveolata]	MUL1-like				metabolism	4dP
NVE5651	serine/threonine-protein kinase Kist-like, partial [Exaiptasia pallida]	UHMK1-like				signaling	4dP
NVE57	endothelin-converting enzyme 1-like [Exaiptasia pallida]	ECE1-like16			sigP:1^18^0.587^YES	signaling	4dP
NVE5782	Meis	meis	yes	*		TF	4dP
NVE5812	alpha-L-fucosidase 1-like [Exaiptasia pallida]	FUCO1-like3				metabolism	4dP
NVE5998	Arp6/NeuroD	arp6		*		TF	4dP
NVE6445		NVE6445				other	4dP
NVE6555	PREDICTED: serine/threonine-protein kinase 31 [Ornithorhynchus anatinus]	STK31-like				signaling	4dP
NVE6574	lysosomal Pro-X carboxypeptidase-like [Exaiptasia pallida]	PCP-like			sigP:1^21^0.863^YES	metabolism	4dP
NVE7015	ephrin type-A receptor 4a [Capsaspora owczarzaki ATCC 30864]	NVE7015				neuro	4dP
NVE702	PREDICTED: kinesin-like protein KIF22-like [Oreochromis niloticus]	KIF22-like				other	4dP
NVE7116	OtxB	otxB	yes	*		TF	4dP
NVE7308	Transcription factor E2F4 [Exaiptasia pallida]	e2f4		*		TF	4dP
NVE7540	3' peak of the connector enhancer of kinase suppressor of ras 2-like [Exaiptasia pallida]	cnk2	yes			signaling	4dP
NVE7601	CCR4-NOT transcription complex subunit 3-like [Orbicella faveolata]	CNOT3-like				metabolism	4dP
NVE7760		NVE7760			sigP:1^18^0.9^YES	other	4dP
NVE783	dolichol-phosphate mannosyltransferase subunit 1-like isoform X1 [Exaiptasia pallida]	DPM1-like2				metabolism	4dP
NVE7831	Morn	morn				other	4dP
NVE7915	monocarboxylate transporter 10-like [Exaiptasia pallida]	MOT10-like29				metabolism	4dP
NVE8104	major facilitator superfamily domain-containing protein 8-like [Orbicella faveolata]	NVE8104				metabolism	4dP
NVE8239	dynein heavy chain 3, axonemal-like [Orbicella faveolata]	DYH3-like2				other	4dP
NVE8464	Hl1 [Nematostella vectensis]	Hl1		*		TF	4dP
NVE8939	Monocarboxylate transporter 8 [Stylophora pistillata]	MOT10-like17	yes			metabolism	4dP
NVE9036	probable ATP-dependent RNA helicase DDX10 [Stylophora pistillata]	DDX10-like2				metabolism	4dP
NVE9411	chromatin accessibility complex protein 1-like [Exaiptasia pallida]	CHRC1-like		*		other	4dP
NVE9445	Fibrillin-2 [Stylophora pistillata]	MSRE-like3			sigP:1^28^0.74^YES	other	4dP
NVE9584	PREDICTED: formin-2-like [Oreochromis niloticus]	FMN1-like				other	4dP
NVE9610	vacuolar protein sorting-associated protein 13A-like, partial [Exaiptasia pallida]	VP13C-like8				metabolism	4dP
NVE9693	Protein jagged-1 [Exaiptasia pallida]	jag1			sigP:1^24^0.804^YES	signaling	4dP
NVE9918	unknown	NVE9918				other	4dP

## Sheet: BMP24MO2dvsStdMO2d-padj<0.05
Id	StdMO-1	StdMO-2	StdMO-3	GDF5lMO-1	GDF5lMO-2	BMP2/4MO-1	BMP2/4MO-2	norm.StdMO-1	norm.StdMO-2	norm.StdMO-3	norm.GDF5lMO-1	norm.GDF5lMO-2	norm.BMP2/4MO-1	norm.BMP2/4MO-2	baseMean	StdMO_2d	GDF5lMO_2d	BMP2/4MO_2d	FoldChange	log2FoldChange	stat	pvalue	padj	dispGeneEst	dispFit	dispMAP	dispersion	betaConv	maxCooks	JGIGene	JGIProtID	ENSEMBL_ID	TF	SignalP	Curated ID	BLAST Hit	Trinotate Name	Trinotate Descr	Emapper Name	Emapper Annotation	Emapper GO Terms
NVE17486	29	48	46	40	77	0	0	31	48	44	42	74	0	0	34.01	41	58	0	0.004	-7.835	-5.162	2.44132e-07	1.87844e-06	0.0673	0.1426	0.1182	0.1182	TRUE	0.2016	e_gw.4338.3.1	151670	NEMVEDRAFT_v1g151670				chymotrypsin [Chelon labrosus]	CPP1_ACRMI	CUB and peptidase domain-containing protein 1 {ECO:0000303|PubMed:23765379};		Tryp_SPc
NVE23043	46	64	22	40	31	0	0	50	63	21	42	30	0	0	29.32	45	36	0	0.004	-7.96	-5.139	2.76401e-07	2.10791e-06	0.1993	0.1632	0.1743	0.1743	TRUE	0.1645
NVE26091	39	43	37	21	23	0	0	42	43	35	22	22	0	0	23.37	40	22	0	0.004	-7.8	-5.122	3.02443e-07	2.29015e-06	0	0.2011	0.127	0.127	TRUE	0.0587
NVE22589	33	68	23	50	50	0	0	36	67	22	52	48	0	0	32.12	42	50	0	0.004	-7.86	-5.093	3.51581e-07	2.63816e-06	0.1926	0.1502	0.1631	0.1631	TRUE	0.2617					sigP:1^21^0.898^YES
NVE4604	25	47	35	22	28	0	0	27	47	33	23	27	0	0	22.35	36	25	0	0.005	-7.636	-4.97	6.70024e-07	4.82719e-06	0.0286	0.2097	0.1497	0.1497	TRUE	0.1713	estExt_gwp.C_1490150,fgenesh1_pm.scaffold_149000009	170524	NEMVEDRAFT_v1g170524,NEMVEDRAFT_v1g230203		sigP:1^17^0.894^YES		RecName: Full=Trypsin-3; AltName: Full=Trypsin III; Flags: Precursor, partial [Salmo salar]	CPP1_ACRMI	CUB and peptidase domain-containing protein 1 {ECO:0000303|PubMed:23765379};
NVE23044	78	141	33	106	27	0	1	84	140	31	111	26	0	1	56.05	85	68	0	0.006	-7.447	-4.739	2.14419e-06	1.42433e-05	0.564	0.092	0.2331	0.2331	TRUE	0.0574					sigP:1^31^0.727^YES		RecName: Full=ADP-ribosyl cyclase/cyclic ADP-ribose hydrolase; AltName: Full=2'-phospho-ADP-ribosyl cyclase; AltName: Full=2'-phospho-ADP-ribosyl cyclase/2'-phospho-cyclic-ADP-ribose transferase; AltName: Full=2'-phospho-cyclic-ADP-ribose transferase; AltName: Full=ADP-ribosyl cyclase; Short=ADPRC; Short=ADRC; AltName: Full=NAD glycohydrolase; AltName: Full=NAD(+) nucleosidase; Short=NADase; Flag…	NADA_APLKU	ADP-ribosyl cyclase/cyclic ADP-ribose hydrolase;	BST1	Bone marrow stromal cell antigen 1	GO:0002376,GO:0005575,GO:0005623,GO:0005886,GO:0006955,GO:0006959,GO:0007275,GO:0008150,GO:0016020,GO:0019898,GO:0032501,GO:0032502,GO:0044425,GO:0044464,GO:0044699,GO:0044707,GO:0050896,GO:0071944
NVE5867	24	29	19	24	11	0	0	26	29	18	25	11	0	0	15.45	24	18	0	0.007	-7.078	-4.458	8.26163e-06	4.95609e-05	0.101	0.2971	0.2366	0.2366	TRUE	0.2102	estExt_fgenesh1_pg.C_16550002	248732	NEMVEDRAFT_v1g248732				ABCA2 protein [Salpingoeca rosetta]
NVE15583	18	48	11	19	22	0	0	19	48	10	20	21	0	0	16.9	26	20	0	0.007	-7.171	-4.424	9.7042e-06	5.75214e-05	0.3585	0.2729	0.2995	0.2995	TRUE	0.3208	fgenesh1_pg.scaffold_3719000001	224010	NEMVEDRAFT_v1g224010		sigP:1^20^0.593^YES
NVE9740	100	177	80	158	144	1	1	108	175	76	165	138	1	1	94.83	120	152	1	0.008	-6.942	-6.395	1.60136e-10	1.88051e-09	0	0.0601	0.076	0.076	TRUE	0.2354					sigP:1^16^0.642^YES					SLIT2	slit homolog	GO:0000003,GO:0000902,GO:0000904,GO:0001501,GO:0001503,GO:0001525,GO:0001554,GO:0001558,GO:0001568,GO:0001654,GO:0001655,GO:0001656,GO:0001657,GO:0001667,GO:0001701,GO:0001704,GO:0001707,GO:0001763,GO:0001764,GO:0001822,GO:0001932,GO:0001933,GO:0001944,GO:0001948,GO:0001959,GO:0001960,GO:0002009,GO:0002040,GO:0002042,GO:0002682,GO:0002683,GO:0002685,GO:0002686,GO:0002688,GO:0002689,GO:0003002,GO:…
NVE11310	31	15	19	23	12	0	0	33	15	18	24	12	0	0	14.54	22	18	0	0.008	-6.944	-4.324	1.52906e-05	8.74207e-05	0.1688	0.3149	0.2685	0.2685	TRUE	0.7359	fgenesh1_pg.scaffold_26000101	201172	NEMVEDRAFT_v1g201172					ESPB1_PIG	Epididymal sperm-binding protein 1;	ELSPBP1	epididymal sperm binding protein 1	GO:0005575,GO:0005576
NVE24091	311	767	184	338	288	6	2	335	759	174	352	277	6	2	272.21	423	314	4	0.009	-6.774	-7.461	8.61465e-14	1.4245e-12	0.3234	0.03	0.1119	0.3234	TRUE	0.222	estExt_fgenesh1_pg.C_80211	238806	NEMVEDRAFT_v1g238806		sigP:1^22^0.786^YES
NVE5095	59	53	50	59	96	0	1	64	52	47	62	92	0	1	45.46	54	77	0	0.009	-6.805	-4.575	4.75757e-06	2.99265e-05	0	0.1102	0.0821	0.0821	TRUE	0.1165	fgenesh1_pg.scaffold_1557000001	222353	NEMVEDRAFT_v1g222353								Galactose binding lectin domain
NVE17895	15	30	13	28	41	0	0	16	30	12	29	39	0	0	18.11	19	34	0	0.009	-6.76	-4.291	1.7827e-05	0.000100663	0.1088	0.2555	0.2107	0.2107	TRUE	0.7804	fgenesh1_pg.scaffold_45000102	203803	NEMVEDRAFT_v1g203803
NVE2371	11	24	23	30	27	0	0	12	24	22	31	26	0	0	16.37	19	28	0	0.009	-6.745	-4.289	1.7917e-05	0.000101086	0.0241	0.2811	0.2046	0.2046	TRUE	0.3677							Complement component C6 [Cricetulus griseus]	CO6_BOVIN	Complement component C6;		MAC/Perforin domain
NVE2958	23	26	11	25	15	0	0	25	26	10	26	14	0	0	14.49	20	20	0	0.009	-6.825	-4.248	2.15273e-05	0.000119777	0.1625	0.3159	0.2679	0.2679	TRUE	0.6945							matrix metallopeptidase 9 (gelatinase B, 92kDa gelatinase, 92kDa type IV collagenase) precursor [Xenopus (Silurana) tropicalis]	SE1L1_MOUSE	Protein sel-1 homolog 1;
NVE7302	931	1147	683	1094	906	11	8	1003	1135	646	1141	871	10	8	687.91	928	1006	9	0.01	-6.653	-16.18	6.97892e-59	2.08493e-56	0	0.0203	0.0338	0.0338	TRUE	0.3107	e_gw.187.55.1	122152	NEMVEDRAFT_v1g122152				GL21759 [Drosophila persimilis]	GAPR1_HUMAN	Golgi-associated plant pathogenesis-related protein 1;		GLI pathogenesis-related 2	GO:0005575,GO:0005576
NVE21156	674	830	656	71	105	8	8	726	821	621	74	101	8	8	337.02	723	88	8	0.011	-6.539	-15.681	2.04123e-55	5.25698e-53	0	0.027	0.0247	0.0247	TRUE	0.0312	e_gw.61.9.1	101730	NEMVEDRAFT_v1g101730	*		NvHoxDa		ANTP_DROME	Homeotic protein antennapedia;	HOXA2	Homeobox A2	GO:0000122,GO:0000902,GO:0000904,GO:0001071,GO:0001501,GO:0001503,GO:0001649,GO:0001709,GO:0002076,GO:0003002,GO:0003674,GO:0003676,GO:0003677,GO:0003700,GO:0005488,GO:0005575,GO:0005622,GO:0005623,GO:0005634,GO:0006355,GO:0006357,GO:0006928,GO:0006935,GO:0007275,GO:0007350,GO:0007379,GO:0007380,GO:0007381,GO:0007382,GO:0007389,GO:0007399,GO:0007409,GO:0007411,GO:0007417,GO:0007420,GO:0007423,GO:…
NVE13104	32	57	38	59	36	1	0	34	56	36	62	35	1	0	31.99	42	48	0	0.011	-6.445	-4.253	2.11144e-05	0.000117596	0	0.1507	0.1278	0.1278	TRUE	0.4402
NVE5924	10	23	16	21	28	0	0	11	23	15	22	27	0	0	13.93	16	24	0	0.011	-6.506	-4.086	4.3907e-05	0.000229537	0.0321	0.328	0.2373	0.2373	TRUE	0.2127
NVE22590	192	274	116	193	179	0	5	207	271	110	201	172	0	5	138.03	196	186	2	0.012	-6.328	-8.536	1.39462e-17	3.2686e-16	0.1903	0.0457	0.0757	0.0757	TRUE	0.1107							calcium-binding protein [Stigmatella aurantiaca]
NVE18868	190	170	105	135	136	0	4	205	168	99	141	131	0	4	106.85	157	136	2	0.012	-6.334	-7.933	2.13828e-15	4.1625e-14	0.0956	0.0549	0.0658	0.0658	TRUE	0.1456	fgenesh1_pg.scaffold_499000007	220308	NEMVEDRAFT_v1g220308				phospholipase A2 [Rhopilema esculentum]	COMA_CONMA	Conodipine-M alpha chain;		protein Hydra magnipapillata
NVE15123	95	181	78	88	122	1	2	102	179	74	92	117	1	2	81.05	118	104	2	0.012	-6.343	-6.87	6.42119e-12	8.71959e-11	0	0.0679	0.0884	0.0884	TRUE	0.264	fgenesh1_pg.scaffold_358000009	218643	NEMVEDRAFT_v1g218643
NVE1825	12	26	7	16	11	0	0	13	26	7	17	11	0	0	10.36	15	14	0	0.012	-6.399	-3.827	0.000129815	0.00061833	0.2763	0.4361	0.3854	0.3854	TRUE	0.1724
NVE22003	651	1098	630	967	1099	1	20	702	1087	596	1008	1057	1	20	638.66	795	1032	10	0.013	-6.258	-6.331	2.44252e-10	2.81953e-09	0.5067	0.0208	0.0547	0.5067	TRUE	0.6103	estExt_gwp.C_670100	165983	NEMVEDRAFT_v1g165983		sigP:1^17^0.777^YES			GAPR1_HUMAN	Golgi-associated plant pathogenesis-related protein 1;		GLI pathogenesis-related 2	GO:0005575,GO:0005576
NVE16687	16	20	6	18	4	0	0	17	20	6	19	4	0	0	9.33	14	12	0	0.013	-6.313	-3.638	0.000274636	0.00121419	0.5652	0.4827	0.5075	0.5075	TRUE	0.819							galactose-3-O-sulfotransferase, putative [Ixodes scapularis]	G3ST1_HUMAN	Galactosylceramide sulfotransferase;		galactosylceramide sulfotransferase-like
NVE12487	32	34	42	42	37	0	1	34	34	40	44	36	0	1	26.89	36	40	0	0.014	-6.209	-4.122	3.75839e-05	0.000198938	0	0.1766	0.1112	0.1112	TRUE	0.0423
NVE7531	426	733	451	484	517	2	14	459	725	427	505	497	2	14	375.58	537	501	8	0.015	-6.104	-13.497	1.6178e-41	2.04794e-39	0.1747	0.0256	0.0425	0.0425	TRUE	0.7349	fgenesh1_pg.scaffold_19000120	200128	NEMVEDRAFT_v1g200128		sigP:1^20^0.795^YES			VITRN_HUMAN	Vitrin;		von Willebrand factor type A domain	GO:0005575,GO:0008150,GO:0009653,GO:0010171,GO:0031012,GO:0032502,GO:0044699,GO:0044767,GO:0048856
NVE26049	80	135	82	142	169	1	2	86	134	78	148	163	1	2	87.28	99	156	2	0.015	-6.087	-6.798	1.05931e-11	1.40277e-10	0	0.0641	0.0584	0.0584	TRUE	0.6065	e_gw.973.1.1	144229	NEMVEDRAFT_v1g144229				matrix metalloproteinase 1 [Nasonia vitripennis]	MMP19_MOUSE	Matrix metalloproteinase-19;		Matrixin
NVE20684	1979	2064	1674	1693	1935	25	37	2133	2043	1584	1766	1861	24	37	1349.51	1920	1814	30	0.016	-5.991	-23.58	6.16629e-123	6.90809e-119	0.0181	0.0172	0.0177	0.0177	TRUE	0.1891	gw.58.76.1	27862	NEMVEDRAFT_v1g27862	*		Gbx	transcription factor [Cyprinus carpio]	GBX2_MOUSE	Homeobox protein GBX-2;	GBX1	Gastrulation brain homeobox	GO:0000228,GO:0001071,GO:0003002,GO:0003674,GO:0003700,GO:0005575,GO:0005622,GO:0005623,GO:0005634,GO:0005694,GO:0006355,GO:0007275,GO:0007389,GO:0007399,GO:0007417,GO:0007420,GO:0007424,GO:0007426,GO:0008150,GO:0009653,GO:0009790,GO:0009792,GO:0009889,GO:0009952,GO:0009966,GO:0010468,GO:0010556,GO:0010646,GO:0019219,GO:0019222,GO:0021532,GO:0021555,GO:0021903,GO:0021915,GO:0022603,GO:0023051,GO:…
NVE8583	5	24	5	10	10	0	0	5	24	5	10	10	0	0	7.7	11	10	0	0.016	-5.982	-3.387	0.000705474	0.00284347	0.5208	0.5819	0.5624	0.5624	TRUE	2.388											Inherit from KOG: bromodomain adjacent to zinc finger domain
NVE7630	288	301	167	355	171	2	7	310	298	158	370	164	2	7	187.12	255	267	4	0.017	-5.862	-9.561	1.16351e-21	3.82815e-20	0.2028	0.0374	0.0823	0.0823	TRUE	0.8345	fgsh_est.C_scaffold_191000004	233339	NEMVEDRAFT_v1g233339		sigP:1^19^0.923^YES
NVE249	539	740	434	729	526	5	16	581	732	411	760	506	5	16	430.1	575	633	10	0.018	-5.809	-13.696	1.0787e-42	1.44726e-40	0.123	0.0241	0.0461	0.0461	TRUE	0.0809	estExt_fgenesh1_pg.C_10301	237831	NEMVEDRAFT_v1g237831
NVE3868	195	203	165	146	172	1	6	210	201	156	152	165	1	6	127.4	189	158	4	0.018	-5.793	-9.585	9.25822e-22	3.06864e-20	0.0136	0.0483	0.0374	0.0374	TRUE	0.1697
NVE23233	72	120	55	82	67	1	2	78	119	52	86	64	1	2	57.33	83	75	2	0.018	-5.826	-6.254	4.01341e-10	4.52336e-09	0	0.0903	0.0959	0.0959	TRUE	0.1187	fgenesh1_pg.scaffold_7426000001	225137	NEMVEDRAFT_v1g225137
NVE3007	1257	1693	797	1655	1598	20	29	1355	1675	754	1726	1537	19	29	1013.56	1261	1632	24	0.019	-5.724	-16.651	2.99265e-62	1.17637e-59	0.0959	0.0183	0.0434	0.0434	TRUE	0.1984	estExt_fgenesh1_pg.C_130133	239286	NEMVEDRAFT_v1g239286		sigP:1^23^0.674^YES
NVE10135	347	525	298	508	505	7	8	374	520	282	530	486	7	8	315.08	392	508	8	0.019	-5.748	-12.686	7.09889e-37	6.76841e-35	0	0.0279	0.0374	0.0374	TRUE	0.1539	e_gw.234.1.1,gw.234.19.1	127011	NEMVEDRAFT_v1g127011,NEMVEDRAFT_v1g16140		sigP:1^24^0.843^YES		fibropellin-1 precursor [Strongylocentrotus purpuratus]	FBP1_STRPU	Fibropellin-1;	DL	Notch ligand involved in the mediation of Notch signaling (By similarity)	GO:0000003,GO:0000278,GO:0000578,GO:0000902,GO:0000904,GO:0001654,GO:0001667,GO:0001708,GO:0001736,GO:0001738,GO:0001745,GO:0001751,GO:0001752,GO:0001754,GO:0002009,GO:0002165,GO:0003002,GO:0003006,GO:0003674,GO:0005102,GO:0005112,GO:0005488,GO:0005515,GO:0005575,GO:0005622,GO:0005623,GO:0005737,GO:0005886,GO:0005911,GO:0005912,GO:0006928,GO:0006996,GO:0007010,GO:0007015,GO:0007049,GO:0007154,GO:…
NVE13292	17	28	32	21	24	0	1	18	28	30	22	23	0	1	17.47	25	22	0	0.019	-5.711	-3.697	0.000218222	0.000989963	0	0.2644	0.1745	0.1745	TRUE	0.2339					sigP:1^20^0.898^YES
NVE21616	1150	1572	838	1497	1450	13	35	1239	1556	793	1561	1394	12	35	941.56	1196	1478	24	0.02	-5.672	-16.248	2.2941e-59	7.23967e-57	0.1441	0.0186	0.0451	0.0451	TRUE	0.1236	e_gw.64.148.1	102323	NEMVEDRAFT_v1g102323		sigP:1^22^0.712^YES			GAPR1_MOUSE	Golgi-associated plant pathogenesis-related protein 1;		GLI pathogenesis-related 2	GO:0005575,GO:0005576
NVE17675	590	623	389	607	513	5	17	636	617	368	633	493	5	17	395.51	540	563	11	0.02	-5.652	-13.655	1.87494e-42	2.47117e-40	0.1169	0.025	0.0437	0.0437	TRUE	0.6092	estExt_fgenesh1_pg.C_440115	241394	NEMVEDRAFT_v1g241394		sigP:1^23^0.845^YES
NVE7121	384	390	222	508	322	5	9	414	386	210	530	310	5	9	266.15	337	420	7	0.02	-5.625	-11.195	4.33818e-29	2.40003e-27	0.1204	0.0304	0.0588	0.0588	TRUE	0.8281					sigP:1^19^0.856^YES
NVE24089	42	219	27	87	46	2	2	45	217	26	91	44	2	2	60.91	96	68	2	0.02	-5.624	-5.609	2.0405e-08	1.82878e-07	0.6416	0.0858	0.2755	0.2755	TRUE	1.9168	estExt_fgenesh1_pg.C_80209	238805	NEMVEDRAFT_v1g238805		sigP:1^22^0.808^YES
NVE25817	1145	1508	935	1354	1258	19	32	1234	1492	885	1412	1210	18	32	897.56	1204	1311	25	0.021	-5.598	-18.329	4.87379e-75	4.55009e-72	0.0521	0.0188	0.03	0.03	TRUE	0.1042	fgenesh1_pg.scaffold_94000057	208634	NEMVEDRAFT_v1g208634		sigP:1^19^0.876^YES
NVE18531	686	1130	813	917	1043	12	25	739	1118	769	956	1003	11	25	660.37	875	980	18	0.021	-5.602	-17.229	1.60964e-66	9.01643e-64	0.0493	0.0206	0.0282	0.0282	TRUE	0.4667								CRVP_TRIST	Cysteine-rich venom protein;
NVE17676	742	1201	666	854	1258	16	21	800	1189	630	891	1210	15	21	679.28	873	1050	18	0.021	-5.599	-15.908	5.55818e-57	1.53749e-54	0.0734	0.0204	0.0386	0.0386	TRUE	0.2589					sigP:1^20^0.803^YES
NVE16127	278	331	159	413	337	5	6	300	328	150	431	324	5	6	220.45	259	378	6	0.021	-5.598	-10.379	3.09258e-25	1.30249e-23	0	0.0338	0.0571	0.0571	TRUE	1.0134
NVE14281	84	55	71	100	80	0	3	91	54	67	104	77	0	3	56.62	71	90	2	0.021	-5.595	-6.113	9.76563e-10	1.04145e-08	0.0483	0.0912	0.0782	0.0782	TRUE	0.1919	e_gw.33.34.1	93663	NEMVEDRAFT_v1g93663		sigP:1^26^0.799^YES		Carbohydrate sulfotransferase 11 [Dicentrarchus labrax]	CHSTB_MOUSE	Carbohydrate sulfotransferase 11;	CHST11	carbohydrate (chondroitin 4) sulfotransferase	GO:0000139,GO:0000902,GO:0000904,GO:0001501,GO:0001537,GO:0002062,GO:0002063,GO:0003674,GO:0003824,GO:0005575,GO:0005622,GO:0005623,GO:0005737,GO:0005794,GO:0005975,GO:0006022,GO:0006023,GO:0006024,GO:0006029,GO:0006082,GO:0006790,GO:0006807,GO:0006928,GO:0006935,GO:0007275,GO:0007399,GO:0007409,GO:0007411,GO:0007517,GO:0007585,GO:0008045,GO:0008146,GO:0008150,GO:0008152,GO:0009058,GO:0009059,GO:…
NVE24592	8	8	10	7	4	0	0	9	8	9	7	4	0	0	5.31	9	6	0	0.021	-5.6	-3.181	0.00146966	0.00543476	0	0.8383	0.5407	0.5407	TRUE	0.0143	e_gw.8394.2.1	155298	NEMVEDRAFT_v1g155298					LIN41_CHICK	E3 ubiquitin-protein ligase TRIM71;	TRIM3	tripartite motif containing 3	GO:0003674,GO:0005488,GO:0005515,GO:0005575,GO:0005622,GO:0005623,GO:0005737,GO:0005768,GO:0005769,GO:0007275,GO:0007399,GO:0008022,GO:0008150,GO:0032501,GO:0032502,GO:0043226,GO:0043227,GO:0043229,GO:0043231,GO:0044424,GO:0044444,GO:0044464,GO:0044699,GO:0044707,GO:0048731,GO:0048856
NVE13538	1282	1586	891	1927	1486	23	34	1382	1570	843	2010	1429	22	34	1041.24	1265	1720	28	0.022	-5.509	-17.112	1.21042e-65	6.02681e-63	0.0803	0.0182	0.0384	0.0384	TRUE	0.4201	e_gw.31.16.1	92831	NEMVEDRAFT_v1g92831	*			transcription factor ZNF845 [Hydra vulgaris]	ZN333_HUMAN	Zinc finger protein 333;		PR domain containing 14
NVE15732	838	929	630	1043	1000	8	29	903	919	596	1088	962	8	29	643.5	806	1025	18	0.022	-5.479	-15.665	2.60797e-55	6.64025e-53	0.1361	0.0208	0.0378	0.0378	TRUE	0.413	estExt_fgenesh1_pg.C_3780014	247932	NEMVEDRAFT_v1g247932		sigP:1^19^0.783^YES			PDI_HUMIN	Protein disulfide-isomerase;	PDIA4	Protein disulfide isomerase family A, member	GO:0003674,GO:0003756,GO:0003824,GO:0005575,GO:0005622,GO:0005623,GO:0005737,GO:0005783,GO:0005788,GO:0006457,GO:0006810,GO:0008104,GO:0008150,GO:0008152,GO:0009306,GO:0009986,GO:0009987,GO:0015031,GO:0016023,GO:0016853,GO:0016860,GO:0016862,GO:0016864,GO:0019538,GO:0031410,GO:0031974,GO:0031982,GO:0031988,GO:0032940,GO:0033036,GO:0042470,GO:0043170,GO:0043226,GO:0043227,GO:0043229,GO:0043231,GO:…
NVE13103	178	256	158	257	192	3	6	192	253	150	268	185	3	6	150.88	198	226	4	0.022	-5.5	-9.713	2.65712e-22	9.23031e-21	0	0.043	0.0497	0.0497	TRUE	0.1223
NVE24294	10673	14111	7957	12837	12026	181	338	11502	13965	7530	13387	11565	172	336	8351.12	10999	12476	254	0.023	-5.437	-19.615	1.14231e-85	1.7063e-82	0.0963	0.0145	0.042	0.042	TRUE	0.1403	estExt_fgenesh1_pg.C_810047	243192	NEMVEDRAFT_v1g243192		sigP:1^20^0.898^YES
NVE856	753	1111	878	957	1071	16	28	812	1099	831	998	1030	15	28	687.56	914	1014	22	0.023	-5.415	-18.611	2.62496e-77	2.94075e-74	0.023	0.0203	0.0211	0.0211	TRUE	0.2508	estExt_fgenesh1_pg.C_1050002	244014	NEMVEDRAFT_v1g244014							SAP-R	Prosaposin	GO:0005575,GO:0005622,GO:0005623,GO:0005737,GO:0006403,GO:0006810,GO:0008150,GO:0015931,GO:0033036,GO:0033227,GO:0044424,GO:0044444,GO:0044464,GO:0044699,GO:0044765,GO:0045169,GO:0050657,GO:0050658,GO:0051179,GO:0051234,GO:0051236,GO:0071702,GO:0071705
NVE15328	224	267	149	308	213	5	5	241	264	141	321	205	5	5	168.92	215	263	5	0.023	-5.47	-9.831	8.29374e-23	2.96379e-21	0	0.0399	0.0566	0.0566	TRUE	0.6778	fgenesh1_pg.scaffold_364000007	218755	NEMVEDRAFT_v1g218755				pannexin 2 isoform B [Danio rerio]	PANX2_HUMAN	Pannexin-2;
NVE897	2877	3651	2210	3190	3249	25	111	3101	3613	2091	3327	3125	24	110	2198.65	2935	3226	67	0.023	-5.453	-8.368	5.86104e-17	1.32649e-15	0.236	0.016	0.0747	0.236	TRUE	0.1865	estExt_fgenesh1_pg.C_1050048	244037	NEMVEDRAFT_v1g244037
NVE6419	14	28	21	26	26	0	1	15	28	20	27	25	0	1	16.54	21	26	0	0.023	-5.426	-3.491	0.000481781	0.00201546	0	0.2785	0.1883	0.1883	TRUE	0.168							solute carrier family 17 (sodium-dependent inorganic phosphate cotransporter)-like [Nasonia vitripennis]	VGLU3_DANRE	Vesicular glutamate transporter 3;		Major Facilitator Superfamily
NVE20709	11	34	20	9	23	0	1	12	34	19	9	22	0	1	13.85	22	16	0	0.023	-5.466	-3.39	0.000700003	0.00282256	0	0.3299	0.295	0.295	TRUE	0.158
NVE8846	7	8	8	9	3	0	0	8	8	8	9	3	0	0	5.04	8	6	0	0.023	-5.424	-3.012	0.00259383	0.00897843	0	0.8814	0.6173	0.6173	TRUE	0.0014
NVE15697	5	10	9	7	0	0	0	5	10	9	7	0	0	0	4.44	8	4	0	0.023	-5.473	-2.743	0.00609692	0.0190899	1.2942	0.9986	1.0457	1.0457	TRUE	0.1449					sigP:1^21^0.844^YES
NVE22462	2615	2823	1767	3184	2864	35	84	2818	2794	1672	3320	2754	33	84	1925.1	2428	3037	58	0.024	-5.382	-17.414	6.46275e-68	4.02234e-65	0.1243	0.0162	0.0449	0.0449	TRUE	0.6002	estExt_fgenesh1_pg.C_70113	238654	NEMVEDRAFT_v1g238654		sigP:1^18^0.619^YES
NVE9500	19	28	13	25	8	1	0	20	28	12	26	8	1	0	13.6	20	17	0	0.024	-5.375	-3.315	0.000915518	0.00359287	0	0.3356	0.3086	0.3086	TRUE	0.07	e_gw.22.105.1	89862	NEMVEDRAFT_v1g89862	*			Transcription factor AP-1 [Salmo salar]	JUN_SERCA	Transcription factor AP-1;	JUN	jun proto-oncogene	GO:0000003,GO:0000165,GO:0000187,GO:0000228,GO:0000302,GO:0000785,GO:0000790,GO:0000791,GO:0000975,GO:0000976,GO:0000977,GO:0000980,GO:0000981,GO:0000982,GO:0000988,GO:0000989,GO:0001012,GO:0001067,GO:0001071,GO:0001076,GO:0001077,GO:0001158,GO:0001190,GO:0001228,GO:0001503,GO:0001525,GO:0001568,GO:0001649,GO:0001654,GO:0001700,GO:0001736,GO:0001738,GO:0001745,GO:0001751,GO:0001752,GO:0001754,GO:…
NVE17661	578	902	593	544	909	11	25	623	893	561	567	874	10	25	507.65	692	720	18	0.025	-5.301	-14.648	1.3803e-48	2.57726e-46	0.0957	0.0226	0.0417	0.0417	TRUE	0.5062	fgenesh1_pg.scaffold_44000100	203655	NEMVEDRAFT_v1g203655
NVE15666	296	360	281	227	248	6	10	319	356	266	237	239	6	10	204.58	314	238	8	0.025	-5.333	-12.623	1.58331e-36	1.48433e-34	0	0.0354	0.0267	0.0267	TRUE	0.089					sigP:1^22^0.772^YES
NVE12190	2590	3680	1739	3579	3474	39	96	2791	3642	1646	3732	3341	37	95	2183.52	2693	3536	66	0.025	-5.346	-9.879	5.14241e-23	1.86441e-21	0.1599	0.016	0.0572	0.1599	TRUE	0.1222	estExt_fgenesh1_pg.C_280129	240414	NEMVEDRAFT_v1g240414		sigP:1^22^0.695^YES
NVE900	12783	16697	8129	15887	13826	170	474	13776	16524	7693	16568	13296	162	471	9784.33	12664	14932	316	0.025	-5.323	-9.279	1.70495e-20	5.12079e-19	0.1878	0.0144	0.0696	0.1878	TRUE	0.2395					sigP:1^23^0.558^YES
NVE21279	46	127	66	3	6	1	3	50	126	62	3	6	1	3	35.79	79	4	2	0.025	-5.346	-6.003	1.9419e-09	1.99144e-08	0	0.1362	0.1531	0.1531	TRUE	0.3447	e_gw.61.121.1	101611	NEMVEDRAFT_v1g101611	*		HoxDb		HXA3_MOUSE	Homeobox protein Hox-A3;	HOXB5A	homeobox	GO:0001708,GO:0005575,GO:0005622,GO:0005623,GO:0005634,GO:0007275,GO:0007399,GO:0007417,GO:0007420,GO:0007507,GO:0008150,GO:0009987,GO:0010002,GO:0030154,GO:0032501,GO:0032502,GO:0035051,GO:0043226,GO:0043227,GO:0043229,GO:0043231,GO:0044424,GO:0044464,GO:0044699,GO:0044707,GO:0044763,GO:0044767,GO:0045165,GO:0048513,GO:0048731,GO:0048856,GO:0048863,GO:0048869,GO:0072358,GO:0072359
NVE10322	14	32	11	38	25	1	0	15	32	10	40	24	1	0	17.4	19	32	0	0.025	-5.295	-3.337	0.000848168	0.00335701	0	0.2654	0.2436	0.2436	TRUE	0.776
NVE19036	1899	2106	1565	2187	2205	38	61	2047	2084	1481	2281	2121	36	61	1444.26	1871	2201	48	0.026	-5.277	-21.566	3.78266e-103	2.82514e-99	0.0382	0.017	0.0222	0.0222	TRUE	0.2681					sigP:1^18^0.906^YES
NVE24290	3330	4981	3224	3934	4167	76	127	3589	4929	3051	4103	4007	72	126	2839.67	3856	4055	99	0.026	-5.282	-21.232	4.80412e-100	2.15282e-96	0.0633	0.0155	0.0297	0.0297	TRUE	0.265
NVE12020	749	987	701	874	884	15	28	807	977	663	911	850	14	28	607.29	816	880	21	0.026	-5.283	-17.474	2.27062e-68	1.54168e-65	0.0324	0.0212	0.0244	0.0244	TRUE	0.0857	e_gw.278.1.1	130363	NEMVEDRAFT_v1g130363				Neurogenic locus Notch protein [Cerapachys biroi]	FBP1_STRPU	Fibropellin-1;		EGF-like domain
NVE17878	783	861	632	897	946	12	29	844	852	598	935	910	11	29	597.07	765	922	20	0.026	-5.257	-16.725	8.61787e-63	3.64324e-60	0.0514	0.0213	0.0273	0.0273	TRUE	0.2886					sigP:1^16^0.685^YES
NVE24260	741	867	650	851	757	11	29	799	858	615	887	728	10	29	560.93	757	808	20	0.026	-5.278	-16.46	7.16199e-61	2.50737e-58	0.0621	0.0218	0.0289	0.0289	TRUE	0.2142	estExt_fgenesh1_pg.C_810001	243173	NEMVEDRAFT_v1g243173								Inherit from euNOG: Periaxin
NVE4080	814	1515	1154	932	1350	19	43	877	1499	1092	972	1298	18	43	828.53	1156	1135	30	0.026	-5.255	-16.308	8.68114e-60	2.81898e-57	0.1018	0.0193	0.0403	0.0403	TRUE	0.1608	e_gw.142.42.1	116985	NEMVEDRAFT_v1g116985		sigP:1^28^0.762^YES			HMCN1_HUMAN	Hemicentin-1;		Immunoglobulin domain
NVE16129	55	73	40	70	77	1	2	59	72	38	73	74	1	2	45.62	56	74	2	0.026	-5.273	-5.687	1.29288e-08	1.19654e-07	0	0.1099	0.0888	0.0888	TRUE	0.1725	fgenesh1_pg.scaffold_39000097	203014	NEMVEDRAFT_v1g203014					TAA7G_RAT	Trace amine-associated receptor 7g;		7 transmembrane receptor (rhodopsin family)
NVE15132	40	51	78	51	112	1	2	43	50	74	53	108	1	2	47.32	56	80	2	0.026	-5.259	-5.563	2.6495e-08	2.33995e-07	0	0.1064	0.1085	0.1085	TRUE	0.4594	fgenesh1_pg.scaffold_359000013	218670	NEMVEDRAFT_v1g218670		sigP:1^20^0.885^YES		Trypsin-1 [Camponotus floridanus]	CPP1_ACRMI	CUB and peptidase domain-containing protein 1 {ECO:0000303|PubMed:23765379};		Tryp_SPc
NVE12146	4	9	8	13	15	0	0	4	9	8	14	14	0	0	6.97	7	14	0	0.026	-5.281	-3.087	0.00202218	0.00722286	0	0.6419	0.4294	0.4294	TRUE	0.1783							RecName: Full=Neuronal acetylcholine receptor subunit non-alpha-3; AltName: Full=GFN-alpha-3; Flags: Precursor	ACH3_DROME	Acetylcholine receptor subunit beta-like 1;	NACHRA7	Acetylcholine Receptor	GO:0000003,GO:0003008,GO:0003674,GO:0004889,GO:0005215,GO:0005216,GO:0005230,GO:0005231,GO:0005261,GO:0005488,GO:0005575,GO:0005623,GO:0005886,GO:0005887,GO:0005892,GO:0006810,GO:0006811,GO:0006812,GO:0007154,GO:0007267,GO:0007268,GO:0007610,GO:0007626,GO:0007630,GO:0007632,GO:0008150,GO:0008324,GO:0008344,GO:0009314,GO:0009416,GO:0009628,GO:0009987,GO:0015075,GO:0015267,GO:0015276,GO:0016020,GO:…
NVE24828	946	1041	994	1448	2060	31	24	1020	1030	941	1510	1981	29	24	933.55	997	1746	26	0.027	-5.222	-20.203	9.23616e-91	1.72455e-87	0	0.0187	0.0163	0.0163	TRUE	0.0194	gw.86.6.1	2109	NEMVEDRAFT_v1g2109		sigP:1^15^0.836^YES		zinc metalloproteinase, putative [Pediculus humanus corporis]	NAS4_CAEEL	Zinc metalloproteinase nas-4;		to astacin family metalloendopeptidase FARM-1 Hydra magnipapillata
NVE22146	374	361	244	444	343	4	14	403	357	231	463	330	4	14	257.41	330	396	9	0.027	-5.233	-11.665	1.91861e-31	1.2681e-29	0.1105	0.031	0.0484	0.0484	TRUE	0.3579					sigP:1^23^0.832^YES						eva-1 homolog C (C. elegans)
NVE25086	119	185	126	152	158	2	6	128	183	119	159	152	2	6	106.99	143	156	4	0.027	-5.204	-8.839	9.65247e-19	2.50897e-17	0.0315	0.0549	0.0473	0.0473	TRUE	0.4062	fgenesh1_pg.scaffold_89000023	208161	NEMVEDRAFT_v1g208161
NVE14975	11	28	15	20	18	0	1	12	28	14	21	17	0	1	13.27	18	19	0	0.027	-5.204	-3.267	0.00108645	0.00416546	0	0.3435	0.255	0.255	TRUE	0.7827					sigP:1^20^0.799^YES
NVE10107	17	32	4	15	3	0	1	18	32	4	16	3	0	1	10.47	18	10	0	0.027	-5.199	-2.969	0.00298781	0.0101786	0.8038	0.4318	0.5609	0.5609	TRUE	0.048
NVE18242	5	11	4	12	4	0	0	5	11	4	13	4	0	0	5.2	7	8	0	0.027	-5.225	-2.848	0.00439443	0.01433	0.3192	0.8548	0.6798	0.6798	TRUE	0.5275	e_gw.4698.2.1	152156	NEMVEDRAFT_v1g152156					NOTC1_DANRE	Neurogenic locus notch homolog protein 1;		Notch ligand involved in the mediation of Notch signaling (By similarity)	GO:0005575,GO:0016020
NVE10136	606	694	410	705	550	11	22	653	687	388	735	529	10	22	432.05	576	632	16	0.028	-5.161	-13.849	1.29224e-43	1.76548e-41	0.0898	0.0241	0.0431	0.0431	TRUE	0.6413	e_gw.234.1.1	127011	NEMVEDRAFT_v1g127011				putative epidermal growth factor [Strongylocentrotus purpuratus]	FBP1_STRPU	Fibropellin-1;		Notch ligand involved in the mediation of Notch signaling (By similarity)	GO:0005575,GO:0016020
NVE17657	189	289	144	290	213	3	9	204	286	136	302	205	3	9	163.58	209	254	6	0.028	-5.156	-9.613	7.01903e-22	2.35432e-20	0.1264	0.0407	0.0642	0.0642	TRUE	0.1					sigP:1^20^0.807^YES
NVE5548	145	189	135	191	204	3	6	156	187	128	199	196	3	6	125.04	157	198	4	0.028	-5.164	-9.402	5.33708e-21	1.65627e-19	0	0.049	0.0382	0.0382	TRUE	0.0883	fgenesh1_pg.scaffold_160000021	212656	NEMVEDRAFT_v1g212656		sigP:1^20^0.772^YES						Galactose binding lectin domain
NVE19826	41	33	29	70	40	1	1	44	33	27	73	38	1	1	31.1	35	56	1	0.028	-5.158	-4.552	5.3157e-06	3.31672e-05	0	0.1546	0.1287	0.1287	TRUE	0.2565	fgenesh1_pg.scaffold_53000128	204789	NEMVEDRAFT_v1g204789				MFS 1 and MFS 1 like domain containing protein [Trichuris trichiura]	MFSD6_MOUSE	Major facilitator superfamily domain-containing protein 6;		major facilitator superfamily domain containing 6
NVE23587	16	25	11	16	15	1	0	17	25	10	17	14	1	0	12.07	17	16	0	0.028	-5.168	-3.229	0.00124386	0.00468402	0	0.3766	0.2669	0.2669	TRUE	0.0699	e_gw.77.9.1	105460	NEMVEDRAFT_v1g105460		sigP:1^18^0.82^YES		Serine protease 27 precursor [Esox lucius]	CTRA_BOVIN	Chymotrypsinogen A;		Tryp_SPc
NVE19038	24	18	9	18	14	0	1	26	18	9	19	13	0	1	12.2	18	16	0	0.028	-5.155	-3.194	0.00140122	0.0052161	0	0.3725	0.2926	0.2926	TRUE	0.0766
NVE6556	6	8	5	19	9	0	0	6	8	5	20	9	0	0	6.8	6	14	0	0.028	-5.154	-2.971	0.00296404	0.0101069	0	0.6575	0.4713	0.4713	TRUE	0.0898	gw.175.1.1	1285	NEMVEDRAFT_v1g1285				Hypothetical protein CBG24130 [Caenorhabditis briggsae]	XYNB_NEOPA	Endo-1,4-beta-xylanase B;
NVE24665	6	11	2	4	2	0	0	6	11	2	4	2	0	0	3.62	6	3	0	0.028	-5.163	-2.633	0.0084589	0.0252176	0.4084	1.2225	0.9537	0.9537	TRUE	0.0433
NVE22150	1242	1619	1013	1535	1442	24	53	1339	1602	959	1601	1387	23	53	994.64	1300	1494	38	0.029	-5.111	-17.031	4.81455e-65	2.34511e-62	0.0978	0.0184	0.0361	0.0361	TRUE	0.1206	fgenesh1_pg.scaffold_68000058	206329	NEMVEDRAFT_v1g206329					LOXH1_HUMAN	Lipoxygenase homology domain-containing protein 1;		Inherit from KOG: G- protein-coupled receptor
NVE10640	725	878	571	814	615	16	27	781	869	540	849	591	15	27	524.71	730	720	21	0.029	-5.123	-15.389	1.95443e-53	4.42334e-51	0.0642	0.0223	0.0355	0.0355	TRUE	0.3016	gw.245.27.1	13724	NEMVEDRAFT_v1g13724				tartrate-resistant acid phosphatase [Carassius auratus]	PPA5_RABIT	Tartrate-resistant acid phosphatase type 5;		Calcineurin-like phosphoesterase
NVE9070	194	371	239	350	568	7	9	209	367	226	365	546	7	9	247.04	267	456	8	0.029	-5.104	-10.998	3.90243e-28	2.01007e-26	0.078	0.0317	0.0477	0.0477	TRUE	0.7946	e_gw.212.61.1	124608	NEMVEDRAFT_v1g124608		sigP:1^16^0.757^YES		GA19845 [Drosophila pseudoobscura pseudoobscura]	NAS15_CAEEL	Zinc metalloproteinase nas-15;		astacin-like metalloendopeptidase (M12 family)
NVE11984	1730	1918	972	2440	1820	27	65	1864	1898	920	2545	1750	26	65	1295.36	1561	2148	46	0.029	-5.113	-9.28	1.68784e-20	5.08302e-19	0.1618	0.0174	0.0598	0.1618	TRUE	1.0386	estExt_fgenesh1_pg.C_2750032	247194	NEMVEDRAFT_v1g247194		sigP:1^20^0.828^YES
NVE15124	158	264	125	138	192	10	1	170	261	118	144	185	10	1	126.98	183	164	6	0.029	-5.107	-8.908	5.17591e-19	1.37407e-17	0.2151	0.0484	0.0776	0.0776	TRUE	0.1338	fgenesh1_pg.scaffold_358000014	218648	NEMVEDRAFT_v1g218648		sigP:1^17^0.816^YES
NVE10259	42	33	23	36	32	0	2	45	33	22	38	31	0	2	24.28	33	34	1	0.029	-5.087	-4.424	9.70671e-06	5.75214e-05	0.064	0.1941	0.1523	0.1523	TRUE	0.0812
NVE17660	350	573	481	281	590	9	20	377	567	455	293	567	9	20	326.91	466	430	14	0.03	-5.044	-12.51	6.54717e-36	5.98759e-34	0.1133	0.0274	0.0516	0.0516	TRUE	0.1008	estExt_fgenesh1_pg.C_440099	241383	NEMVEDRAFT_v1g241383		sigP:1^21^0.746^YES
NVE17659	452	467	304	561	429	6	19	487	462	288	585	413	6	19	322.74	412	499	12	0.03	-5.078	-12.416	2.14831e-35	1.87296e-33	0.1212	0.0275	0.0477	0.0477	TRUE	0.5419
NVE901	7394	9502	5998	8446	9839	125	342	7969	9404	5676	8808	9462	119	340	5968.18	7683	9135	230	0.03	-5.066	-10.027	1.16398e-23	4.41287e-22	0.1446	0.0147	0.0554	0.1446	TRUE	0.1447
NVE24289	7052	16324	6962	11020	18059	190	428	7600	16155	6589	11492	17367	181	426	8544.15	10115	14430	304	0.03	-5.061	-7.882	3.21854e-15	6.15313e-14	0.2357	0.0145	0.0747	0.2357	TRUE	2.2236	estExt_fgenesh1_pg.C_810040	243188	NEMVEDRAFT_v1g243188		sigP:1^20^0.949^YES
NVE9656	54	53	39	44	24	1	2	58	52	37	46	23	1	2	31.35	49	34	2	0.03	-5.073	-5.264	1.40586e-07	1.12218e-06	0	0.1535	0.1276	0.1276	TRUE	0.2651	fgenesh1_pg.scaffold_2231000001	223067	NEMVEDRAFT_v1g223067				Fibropellin-3 [Crassostrea gigas]	FAT1_HUMAN	Protocadherin Fat 1;		Notch ligand involved in the mediation of Notch signaling (By similarity)	GO:0005575,GO:0016020
NVE22874	37	45	15	48	39	0	2	40	45	14	50	38	0	2	26.88	33	44	1	0.03	-5.072	-4.318	1.57163e-05	8.96257e-05	0.2048	0.1767	0.1851	0.1851	TRUE	1.1876
NVE4834	12	20	17	2	7	0	1	13	20	16	2	7	0	1	8.38	16	4	0	0.03	-5.064	-3.053	0.00226547	0.00797612	0	0.5363	0.3761	0.3761	TRUE	0.0504	gw.151.13.1	15221	NEMVEDRAFT_v1g15221			Noggin	noggin [Branchiostoma floridae]	NOGG_HUMAN	Noggin;		K04658 noggin
NVE6572	24	17	6	14	5	1	0	26	17	6	15	5	1	0	9.82	16	10	0	0.03	-5.05	-2.981	0.00287432	0.00982486	0	0.4596	0.4422	0.4422	TRUE	0.0629	fgenesh1_pg.scaffold_175000033	213403	NEMVEDRAFT_v1g213403
NVE19767	6868	6302	3767	7641	5191	76	280	7402	6237	3565	7968	4992	72	278	4359.22	5735	6480	175	0.031	-5.032	-7.515	5.69564e-14	9.58802e-13	0.2551	0.015	0.0877	0.2551	TRUE	0.2457					sigP:1^25^0.801^YES
NVE9071	2478	4321	3417	4347	6891	124	101	2671	4276	3234	4533	6627	118	100	3079.87	3394	5580	109	0.032	-4.958	-20.547	8.19656e-94	1.83652e-90	0.0447	0.0154	0.0281	0.0281	TRUE	0.2481	e_gw.212.36.1	124644	NEMVEDRAFT_v1g124644					CTRB1_MOUSE	Chymotrypsinogen B;		Tryp_SPc
NVE12488	207	329	233	267	309	9	8	223	326	221	278	297	9	8	194.47	257	288	8	0.032	-4.957	-11.58	5.23226e-31	3.33051e-29	0	0.0365	0.0335	0.0335	TRUE	0.4157	gw.29.181.1	60721	NEMVEDRAFT_v1g60721				Neurogenic locus Notch protein [Crassostrea gigas]	NOTC1_DANRE	Neurogenic locus notch homolog protein 1;		EGF-like domain
NVE896	2485	4013	2380	3641	4284	54	138	2678	3971	2252	3797	4120	51	137	2429.62	2967	3958	94	0.032	-4.977	-9.73	2.23531e-22	7.77706e-21	0.1445	0.0158	0.0508	0.1445	TRUE	0.4575					sigP:1^21^0.817^YES
NVE9965	1862	2734	1172	694	373	57	71	2007	2706	1109	724	359	54	71	1004.1	1941	542	62	0.032	-4.959	-9.164	5.00051e-20	1.44012e-18	0.1593	0.0183	0.0635	0.1593	TRUE	0.0465	estExt_fgenesh1_pg.C_230118	240030	NEMVEDRAFT_v1g240030		sigP:1^25^0.769^YES
NVE13102	194	324	134	264	223	1	13	209	321	127	275	214	1	13	165.74	219	244	7	0.032	-4.986	-5.421	5.92353e-08	4.98957e-07	0.4014	0.0404	0.0914	0.4014	TRUE	0.108	e_gw.30.355.1	92319	NEMVEDRAFT_v1g92319				SJCHGC09417 protein [Schistosoma japonicum]	GAPR1_MOUSE	Golgi-associated plant pathogenesis-related protein 1;		GLI pathogenesis-related 2	GO:0005575,GO:0005576
NVE20065	3324	4842	3394	4634	4829	83	174	3582	4792	3212	4833	4644	79	173	3044.94	3862	4738	126	0.033	-4.941	-18.59	3.83759e-77	4.09452e-74	0.0887	0.0154	0.036	0.036	TRUE	0.36	e_gw.548.10.1	140859	NEMVEDRAFT_v1g140859		sigP:1^19^0.552^YES			SVEP1_HUMAN	Sushi, von Willebrand factor type A, EGF and pentraxin domain-containing protein 1;		MAC/Perforin domain
NVE1558	1750	2498	1687	2055	2238	43	90	1886	2472	1597	2143	2152	41	90	1482.9	1985	2148	66	0.033	-4.932	-18.128	1.93045e-73	1.6636e-70	0.0866	0.0169	0.0335	0.0335	TRUE	0.1943	estExt_gwp.C_1120111	168742	NEMVEDRAFT_v1g168742			kex2-like endoprotease	RecName: Full=PC3-like endoprotease variant A; AltName: Full=SPC3; Flags: Precursor [Hydra vulgaris]	NECA_HYDVU	PC3-like endoprotease variant A;		Proprotein convertase P-domain
NVE11985	3023	3042	1787	3890	2690	67	111	3258	3010	1691	4057	2587	64	110	2111.03	2653	3322	87	0.033	-4.932	-16.118	1.89324e-58	5.50907e-56	0.1047	0.016	0.0471	0.0471	TRUE	0.8149
NVE13812	881	1713	1215	953	1375	27	58	949	1695	1150	994	1322	26	58	884.86	1265	1158	42	0.033	-4.928	-15.472	5.36673e-54	1.26576e-51	0.1174	0.0189	0.0441	0.0441	TRUE	0.2776	fgenesh1_pg.scaffold_318000026,fgenesh1_pg.scaffold_318000024,estExt_fgenesh1_pg.C_3180024	217934,217932,247586	NEMVEDRAFT_v1g217934,NEMVEDRAFT_v1g217932,NEMVEDRAFT_v1g247586					VITRN_MOUSE	Vitrin;	MATN1	matrilin 1, cartilage matrix protein	GO:0003674,GO:0005198,GO:0005201,GO:0005575,GO:0005576,GO:0005578,GO:0006461,GO:0008150,GO:0016043,GO:0022607,GO:0031012,GO:0043933,GO:0044085,GO:0044421,GO:0065003,GO:0070271,GO:0071822,GO:0071840
NVE16876	508	684	408	680	471	13	23	547	677	386	709	453	12	23	401.12	537	581	18	0.033	-4.935	-13.409	5.38824e-41	6.70716e-39	0.0867	0.0249	0.0441	0.0441	TRUE	0.0934	e_gw.41.120.1	95962	NEMVEDRAFT_v1g95962	*			PREDICTED: transcription factor AP-1-like [Takifugu rubripes]	JUN_SERCA	Transcription factor AP-1;	JUN	jun proto-oncogene	GO:0000003,GO:0000165,GO:0000187,GO:0000228,GO:0000302,GO:0000785,GO:0000790,GO:0000791,GO:0000975,GO:0000976,GO:0000977,GO:0000980,GO:0000981,GO:0000982,GO:0000988,GO:0000989,GO:0001012,GO:0001067,GO:0001071,GO:0001076,GO:0001077,GO:0001158,GO:0001190,GO:0001228,GO:0001503,GO:0001525,GO:0001568,GO:0001649,GO:0001654,GO:0001700,GO:0001736,GO:0001738,GO:0001745,GO:0001751,GO:0001752,GO:0001754,GO:…
NVE2139	333	503	310	584	548	8	18	359	498	293	609	527	8	18	330.22	383	568	13	0.033	-4.919	-12.891	5.03005e-38	5.16988e-36	0.0628	0.0272	0.0369	0.0369	TRUE	0.2799	e_gw.12.274.1	85742	NEMVEDRAFT_v1g85742		sigP:1^20^0.888^YES		Arylsulfatase B [Zootermopsis nevadensis]	ARSB_MOUSE	Arylsulfatase B;		Arylsulfatase	GO:0003674,GO:0003824,GO:0003943,GO:0008150,GO:0008152,GO:0008484,GO:0016787,GO:0016788
NVE17656	379	574	335	482	539	7	22	408	568	317	503	518	7	22	334.72	431	510	14	0.033	-4.928	-12.762	2.68919e-37	2.63117e-35	0.1112	0.027	0.0439	0.0439	TRUE	0.1667
NVE11556	230	321	193	291	281	6	11	248	318	183	303	270	6	11	191.22	250	286	8	0.033	-4.913	-11.097	1.30082e-28	6.92307e-27	0.0492	0.0369	0.0409	0.0409	TRUE	0.0798	fgenesh1_pg.scaffold_265000031	216602	NEMVEDRAFT_v1g216602				Neurogenic locus notch like protein 1 [Pteropus alecto]	FAT2_DROME	Fat-like cadherin-related tumor suppressor homolog;
NVE3662	2451	2832	1549	3249	2287	52	105	2641	2803	1466	3388	2199	49	104	1807.35	2303	2794	76	0.033	-4.905	-10.044	9.76e-24	3.71909e-22	0.1298	0.0164	0.0524	0.1298	TRUE	0.818					sigP:1^19^0.737^YES
NVE6368	818	959	574	1105	884	13	40	882	949	543	1152	850	12	40	632.64	791	1001	26	0.033	-4.927	-8.586	9.00531e-18	2.1511e-16	0.1669	0.0209	0.0513	0.1669	TRUE	0.5968	estExt_fgenesh1_pg.C_1720005	245671	NEMVEDRAFT_v1g245671		sigP:1^19^0.817^YES
NVE14786	121	191	81	157	153	5	4	130	189	77	164	147	5	4	102.24	132	156	4	0.033	-4.916	-8.121	4.63205e-16	9.64551e-15	0	0.0568	0.0748	0.0748	TRUE	0.0835					sigP:1^23^0.896^YES
NVE12361	41	46	47	63	54	3	0	44	46	44	66	52	3	0	36.38	45	59	2	0.033	-4.943	-5.319	1.04292e-07	8.49115e-07	0	0.1342	0.0879	0.0879	TRUE	0.0013								FAT1_HUMAN	Protocadherin Fat 1;
NVE8995	7	5	4	10	3	0	0	8	5	4	10	3	0	0	4.23	6	6	0	0.033	-4.919	-2.612	0.00899584	0.0265841	0.2136	1.0489	0.7702	0.7702	TRUE	0.1582	e_gw.2104.5.1	147707	NEMVEDRAFT_v1g147707				PREDICTED: multidrug resistance-associated protein 4 isoform X2 [Bos taurus]	MRP4_HUMAN	Multidrug resistance-associated protein 4;	ABCC4	ATP-binding cassette, sub-family C (CFTR MRP), member	GO:0000003,GO:0001775,GO:0002576,GO:0003674,GO:0003824,GO:0005215,GO:0005575,GO:0005622,GO:0005623,GO:0005737,GO:0005886,GO:0006139,GO:0006152,GO:0006163,GO:0006195,GO:0006200,GO:0006725,GO:0006753,GO:0006793,GO:0006796,GO:0006807,GO:0006810,GO:0006855,GO:0006887,GO:0006950,GO:0007596,GO:0007599,GO:0007610,GO:0008150,GO:0008152,GO:0008284,GO:0008559,GO:0009056,GO:0009116,GO:0009117,GO:0009119,GO:…
NVE19744	904	1174	586	1225	922	28	35	974	1162	555	1277	887	27	35	702.32	897	1082	31	0.034	-4.87	-14.534	7.40966e-48	1.32817e-45	0.0935	0.0202	0.0453	0.0453	TRUE	0.2515					sigP:1^18^0.767^YES
NVE11979	326	501	342	397	457	13	14	351	496	324	414	439	12	14	292.94	390	426	13	0.034	-4.894	-13.589	4.65667e-42	6.06612e-40	0	0.0289	0.0293	0.0293	TRUE	0.4307	e_gw.275.66.1	130221	NEMVEDRAFT_v1g130221				PREDICTED: 72 kDa type IV collagenase [Calypte anna]	MMP9_CANFA
NVE4038	369	514	296	475	459	18	10	398	509	280	495	441	17	10	307.18	396	468	14	0.034	-4.864	-12.899	4.53886e-38	4.70823e-36	0.058	0.0282	0.038	0.038	TRUE	0.0806	estExt_fgenesh1_pg.C_1410044	244996	NEMVEDRAFT_v1g244996		sigP:1^21^0.89^YES		biomphalysin [Biomphalaria glabrata]	AERA_AERSA	Aerolysin;
NVE22154	738	1058	817	901	951	16	46	795	1047	773	940	915	15	46	647.24	872	928	30	0.035	-4.847	-15.966	2.19764e-57	6.15504e-55	0.0976	0.0207	0.0334	0.0334	TRUE	0.2455					sigP:1^18^0.893^YES
NVE25818	533	752	506	719	649	10	33	574	744	479	750	624	10	33	459.11	599	687	22	0.035	-4.833	-13.931	4.11181e-44	5.75808e-42	0.1261	0.0235	0.041	0.041	TRUE	0.1671	fgenesh1_pg.scaffold_94000058	208635	NEMVEDRAFT_v1g208635		sigP:1^43^0.51^YES
NVE3863	119	238	189	162	222	8	5	128	236	179	169	213	8	5	133.95	181	191	6	0.035	-4.843	-9.639	5.48394e-22	1.85329e-20	0	0.0466	0.0509	0.0509	TRUE	0.0786	e_gw.14.120.1	86856	NEMVEDRAFT_v1g86856				cubilin (intrinsic factor-cobalamin receptor), isoform CRA_b [Rattus norvegicus]	CUBN_RAT	Cubilin;	CUBN	cubilin (intrinsic factor-cobalamin receptor)	GO:0000323,GO:0001701,GO:0001894,GO:0003674,GO:0003824,GO:0004175,GO:0004222,GO:0004872,GO:0005215,GO:0005488,GO:0005515,GO:0005575,GO:0005622,GO:0005623,GO:0005737,GO:0005764,GO:0005765,GO:0005768,GO:0005773,GO:0005774,GO:0005775,GO:0005783,GO:0005794,GO:0005829,GO:0005856,GO:0005875,GO:0005886,GO:0005903,GO:0005905,GO:0006066,GO:0006461,GO:0006629,GO:0006766,GO:0006775,GO:0006810,GO:0006897,GO:…
NVE12998	93	153	88	12	10	6	2	100	151	83	13	10	6	2	52.11	111	12	4	0.035	-4.848	-7.446	9.60509e-14	1.57434e-12	0	0.0979	0.0903	0.0903	TRUE	0.1549	fgenesh1_pg.scaffold_3000197	196876	NEMVEDRAFT_v1g196876	*		HoxE/Anthox1a	homeobox protein Hox-C5 [Xenopus laevis]	HXD4A_DANRE	Homeobox protein Hox-D4a;	HOXC4	homeobox	GO:0000122,GO:0000975,GO:0000976,GO:0000977,GO:0000981,GO:0001012,GO:0001067,GO:0001071,GO:0001501,GO:0003002,GO:0003674,GO:0003676,GO:0003677,GO:0003700,GO:0003705,GO:0005488,GO:0005515,GO:0005575,GO:0005622,GO:0005623,GO:0005634,GO:0006139,GO:0006351,GO:0006355,GO:0006357,GO:0006366,GO:0006725,GO:0006807,GO:0006917,GO:0007275,GO:0007350,GO:0007379,GO:0007380,GO:0007389,GO:0007399,GO:0007417,GO:…
NVE898	38	81	48	65	108	1	3	41	80	45	68	104	1	3	48.87	55	86	2	0.035	-4.834	-5.734	9.79721e-09	9.20018e-08	0	0.1035	0.1031	0.1031	TRUE	0.852					sigP:1^18^0.776^YES
NVE4195	35	56	35	45	44	3	0	38	55	33	47	42	3	0	31.19	42	44	2	0.035	-4.856	-5.081	3.75613e-07	2.80626e-06	0.0313	0.1542	0.1158	0.1158	TRUE	0.397
NVE5729	15	58	11	51	24	1	1	16	57	10	53	23	1	1	23.17	28	38	1	0.035	-4.848	-3.835	0.000125517	0.000599772	0	0.2028	0.3072	0.3072	TRUE	2.3409
NVE16690	6	7	2	5	4	0	0	6	7	2	5	4	0	0	3.48	5	4	0	0.035	-4.828	-2.49	0.0127745	0.0357781	0	1.2717	0.8888	0.8888	TRUE	0.4441					sigP:1^22^0.69^YES		beta-2-glycoprotein 1-like protein [Camelus ferus]	CSMD3_HUMAN	CUB and sushi domain-containing protein 3;	C2	Complement component 2	GO:0001848,GO:0002237,GO:0002250,GO:0002252,GO:0002253,GO:0002376,GO:0002443,GO:0002449,GO:0002455,GO:0002460,GO:0002673,GO:0002682,GO:0002684,GO:0002697,GO:0002920,GO:0003674,GO:0003824,GO:0004175,GO:0004252,GO:0005488,GO:0005515,GO:0005575,GO:0005576,GO:0005615,GO:0005623,GO:0005886,GO:0006950,GO:0006952,GO:0006955,GO:0006956,GO:0006957,GO:0006958,GO:0006959,GO:0007584,GO:0008150,GO:0008152,GO:…
NVE17662	514	691	424	564	554	16	24	554	684	401	588	533	15	24	399.86	546	560	20	0.036	-4.81	-14.559	5.10631e-48	9.30179e-46	0.0464	0.0249	0.0322	0.0322	TRUE	0.0826	fgenesh1_pg.scaffold_44000100	203655	NEMVEDRAFT_v1g203655		sigP:1^18^0.732^YES
NVE3837	417	419	233	527	415	11	16	449	415	221	550	399	10	16	294.23	362	474	13	0.036	-4.781	-11.689	1.45515e-31	9.73253e-30	0.0949	0.0288	0.051	0.051	TRUE	0.8961	fgenesh1_pg.scaffold_14000065	199300	NEMVEDRAFT_v1g199300		sigP:1^22^0.831^YES		phospholipase A2 [Rhopilema esculentum]				protein Hydra magnipapillata
NVE21061	5056	5458	3375	5730	4768	104	240	5449	5401	3194	5975	4585	99	239	3563.24	4681	5280	169	0.036	-4.795	-9.993	1.63749e-23	6.15596e-22	0.1292	0.0152	0.0513	0.1292	TRUE	0.6279	estExt_fgenesh1_pg.C_60184	238573	NEMVEDRAFT_v1g238573		sigP:1^19^0.926^YES
NVE2957	169	191	126	205	160	4	8	182	189	119	214	154	4	8	124.26	163	184	6	0.036	-4.805	-9.333	1.02883e-20	3.13631e-19	0.0533	0.0492	0.0506	0.0506	TRUE	0.4029	e_gw.13.285.1	86166	NEMVEDRAFT_v1g86166		sigP:1^24^0.831^YES		180 kDa transmembrane PLA2 receptor precursor [Homo sapiens]	MMP9_MOUSE	Matrix metalloproteinase-9;
NVE6185	180	367	134	70	89	7	10	194	363	127	73	86	7	10	122.74	228	80	8	0.036	-4.784	-9.072	1.17354e-19	3.26638e-18	0.1589	0.0496	0.0881	0.0881	TRUE	0.145	estExt_fgenesh1_pg.C_170075	239622	NEMVEDRAFT_v1g239622				coagulation factor V precursor [Gallus gallus]	FA5_BOVIN	Coagulation factor V;		Inherit from opiNOG: F5/8 type C domain
NVE8200	81	110	49	45	50	4	2	87	109	46	47	48	4	2	49.05	81	48	3	0.036	-4.794	-6.561	5.33833e-11	6.63398e-10	0	0.1032	0.1025	0.1025	TRUE	0.119
NVE23805	46	87	29	62	57	2	2	50	86	27	65	55	2	2	40.93	54	60	2	0.036	-4.805	-5.467	4.57693e-08	3.92614e-07	0	0.1209	0.138	0.138	TRUE	0.1451							hepatopancreas kazal-type proteinase inhibitor 1A1 [Penaeus monodon]	AGRIN_RAT	Agrin;	AGRN	K06254 agrin	GO:0000323,GO:0000902,GO:0000904,GO:0001932,GO:0001934,GO:0001948,GO:0002162,GO:0003002,GO:0003008,GO:0003674,GO:0005198,GO:0005200,GO:0005488,GO:0005509,GO:0005515,GO:0005539,GO:0005575,GO:0005576,GO:0005578,GO:0005604,GO:0005605,GO:0005615,GO:0005622,GO:0005623,GO:0005737,GO:0005764,GO:0005773,GO:0005775,GO:0005794,GO:0005796,GO:0005886,GO:0005975,GO:0006022,GO:0006023,GO:0006024,GO:0006026,GO:…
NVE9085	8	20	13	12	13	0	1	9	20	12	13	13	0	1	9.53	14	13	0	0.036	-4.804	-2.944	0.00323496	0.0109062	0	0.4729	0.3196	0.3196	TRUE	0.1919	e_gw.2123.6.1	147756	NEMVEDRAFT_v1g147756					FP2_MYTGA	Adhesive plaque matrix protein 2;		Notch ligand involved in the mediation of Notch signaling (By similarity)	GO:0005575,GO:0016020
NVE9212	3	4	8	4	8	0	0	3	4	8	4	8	0	0	3.8	5	6	0	0.036	-4.788	-2.526	0.0115392	0.0328232	0	1.164	0.79	0.79	TRUE	0.314	gw.2158.3.1	1881	NEMVEDRAFT_v1g1881				WD domain, G-beta repeat protein [Tetrahymena thermophila SB210]	WDR53_MOUSE	WD repeat-containing protein 53;	WDR53	WD repeat domain 53
NVE23085	264	341	221	285	274	10	11	285	337	209	297	264	10	11	201.75	277	280	10	0.037	-4.762	-11.832	2.66271e-32	1.9122e-30	0	0.0357	0.0348	0.0348	TRUE	0.109							GJ14166 [Drosophila virilis]
NVE22591	242	616	239	370	397	9	19	261	610	226	386	382	9	19	270.24	366	384	14	0.037	-4.741	-10.252	1.16066e-24	4.69419e-23	0.1996	0.0302	0.0795	0.0795	TRUE	2.6114	e_gw.70.1.1	103841	NEMVEDRAFT_v1g103841				putative aggregation factor core protein MAFp3, isoform C [Nonlabens dokdonensis]	FBP1_STRPU	Fibropellin-1;
NVE13811	155	270	213	168	267	5	11	167	267	202	175	257	5	11	154.78	212	216	8	0.037	-4.766	-10.234	1.3979e-24	5.60311e-23	0.0619	0.0422	0.0483	0.0483	TRUE	0.1701	fgenesh1_pg.scaffold_318000023	217931	NEMVEDRAFT_v1g217931					VITRN_MOUSE	Vitrin;		collagen, type XIV, alpha 1	GO:0005575,GO:0005576,GO:0005578,GO:0005604,GO:0008150,GO:0009987,GO:0016043,GO:0022607,GO:0030198,GO:0031012,GO:0043062,GO:0044085,GO:0044420,GO:0044421,GO:0044699,GO:0044763,GO:0070831,GO:0071711,GO:0071840
NVE13813	140	289	202	153	245	6	10	151	286	191	160	236	6	10	148.41	209	198	8	0.037	-4.749	-9.837	7.79771e-23	2.79993e-21	0.0853	0.0435	0.0576	0.0576	TRUE	0.2256	fgenesh1_pg.scaffold_318000026	217934	NEMVEDRAFT_v1g217934		sigP:1^24^0.801^YES			COCH_CHICK	Cochlin;	MATN1	matrilin 1, cartilage matrix protein	GO:0003674,GO:0005198,GO:0005201,GO:0005575,GO:0005576,GO:0005578,GO:0006461,GO:0008150,GO:0016043,GO:0022607,GO:0031012,GO:0043933,GO:0044085,GO:0044421,GO:0065003,GO:0070271,GO:0071822,GO:0071840
NVE1170	152	262	139	204	213	9	5	164	259	132	213	205	9	5	140.82	185	209	7	0.037	-4.767	-9.59	8.83256e-22	2.93624e-20	0.0724	0.045	0.0544	0.0544	TRUE	0.3855	fgenesh1_pg.scaffold_109000047	209669	NEMVEDRAFT_v1g209669		sigP:1^24^0.721^YES		GLI pathogenesis-related 2 [Xenopus laevis]	GAPR1_HUMAN	Golgi-associated plant pathogenesis-related protein 1;		GLI pathogenesis-related 2	GO:0005575,GO:0005576
NVE23228	109	147	101	167	132	2	7	117	145	96	174	127	2	7	95.5	119	150	4	0.037	-4.768	-8.28	1.23191e-16	2.71674e-15	0.0433	0.0598	0.0548	0.0548	TRUE	0.1133					sigP:1^21^0.826^YES
NVE9188	2934	3489	2307	3521	3136	72	155	3162	3453	2183	3672	3016	68	154	2244.06	2933	3344	111	0.038	-4.722	-16.696	1.39909e-62	5.69964e-60	0.0956	0.0159	0.0407	0.0407	TRUE	0.4052					sigP:1^23^0.896^YES			GAPR1_HUMAN	Golgi-associated plant pathogenesis-related protein 1;		GLI pathogenesis-related 2
NVE10137	138	164	114	158	151	4	7	149	162	108	165	145	4	7	105.67	140	155	6	0.038	-4.704	-9.03	1.71783e-19	4.72267e-18	0	0.0554	0.0446	0.0446	TRUE	0.2794	e_gw.234.52.1	127073	NEMVEDRAFT_v1g127073					JAG1B_DANRE	Protein jagged-1b;		Notch ligand involved in the mediation of Notch signaling (By similarity)	GO:0005575,GO:0016020
NVE10321	104	203	116	195	223	6	5	112	201	110	203	214	6	5	121.61	141	208	6	0.038	-4.722	-8.743	2.26893e-18	5.69929e-17	0	0.0499	0.0561	0.0561	TRUE	0.9643	e_gw.24.111.1,gw.24.247.1	90390.7	NEMVEDRAFT_v1g90390,NEMVEDRAFT_v1g65149					TLL1_HUMAN	Tolloid-like protein 1;
NVE2193	814	1123	831	910	982	15	57	877	1111	786	949	944	14	57	677.05	925	946	36	0.038	-4.707	-8.057	7.80463e-16	1.58397e-14	0.1799	0.0204	0.0489	0.1799	TRUE	0.2471	estExt_gwp.C_120350	160199	NEMVEDRAFT_v1g160199				RecName: Full=E3 ubiquitin-protein ligase TRIM71; AltName: Full=Protein lin-41 homolog; AltName: Full=Tripartite motif-containing protein 71 [Danio rerio]	LIN41_CHICK	E3 ubiquitin-protein ligase TRIM71;	TRIM3	tripartite motif containing 3	GO:0003674,GO:0005488,GO:0005515,GO:0005575,GO:0005622,GO:0005623,GO:0005737,GO:0005768,GO:0005769,GO:0007275,GO:0007399,GO:0008022,GO:0008150,GO:0032501,GO:0032502,GO:0043226,GO:0043227,GO:0043229,GO:0043231,GO:0044424,GO:0044444,GO:0044464,GO:0044699,GO:0044707,GO:0048731,GO:0048856
NVE16711	5	5	4	18	3	0	0	5	5	4	19	3	0	0	5.11	5	11	0	0.038	-4.716	-2.514	0.0119401	0.0338131	0.4951	0.8699	0.7438	0.7438	TRUE	0.0402							venom protein Ci-80a [Chelonus inanitus]	CYSP2_HOMAM	Digestive cysteine proteinase 2;		Cathepsin propeptide inhibitor domain (I29)
NVE8351	854	1393	942	1068	1171	31	55	920	1379	891	1114	1126	29	55	787.78	1063	1120	42	0.039	-4.664	-16.69	1.5401e-62	6.16203e-60	0.0576	0.0195	0.0307	0.0307	TRUE	0.5364	fgenesh1_pg.scaffold_20000100	200262	NEMVEDRAFT_v1g200262					COCA1_HUMAN	Collagen alpha-1(XII) chain;	COL14A1	collagen, type XIV, alpha 1	GO:0001558,GO:0001894,GO:0003229,GO:0003674,GO:0005198,GO:0005201,GO:0005488,GO:0005515,GO:0005518,GO:0005575,GO:0005576,GO:0005578,GO:0005581,GO:0005593,GO:0005596,GO:0005614,GO:0005615,GO:0005622,GO:0005623,GO:0005737,GO:0005783,GO:0005788,GO:0007155,GO:0007275,GO:0007507,GO:0008150,GO:0009888,GO:0009987,GO:0010611,GO:0014706,GO:0014743,GO:0016043,GO:0016202,GO:0016337,GO:0022610,GO:0030198,GO:…
NVE7374	268	380	247	416	318	10	14	289	376	234	434	306	10	14	237.39	300	370	12	0.039	-4.681	-11.826	2.87901e-32	2.05437e-30	0.0511	0.0324	0.039	0.039	TRUE	0.1504	fgenesh1_pg.scaffold_188000034	213968	NEMVEDRAFT_v1g213968		sigP:1^28^0.66^YES			GELA_DICDI	Gelation factor;
NVE5854	146	202	256	346	648	6	10	157	200	242	361	623	6	10	228.45	200	492	8	0.039	-4.683	-10.118	4.59438e-24	1.78408e-22	0.0736	0.0331	0.0466	0.0466	TRUE	0.16					sigP:1^16^0.827^YES
NVE19368	1459	1648	1041	1668	1392	29	82	1572	1631	985	1739	1339	28	82	1053.67	1396	1539	55	0.039	-4.679	-8.757	1.99876e-18	5.05465e-17	0.1536	0.0181	0.053	0.1536	TRUE	0.5328	estExt_fgenesh1_pg.C_510039	241768	NEMVEDRAFT_v1g241768
NVE22153	8	18	12	20	17	0	1	9	18	11	21	16	0	1	10.86	13	18	0	0.039	-4.696	-2.913	0.0035852	0.0119592	0	0.417	0.2817	0.2817	TRUE	0.3601
NVE17658	1470	1884	1398	1633	1585	44	86	1584	1864	1323	1703	1524	42	86	1160.9	1590	1614	64	0.04	-4.647	-18.212	4.173e-74	3.74001e-71	0.057	0.0177	0.0281	0.0281	TRUE	0.072
NVE14687	943	1516	813	1023	903	39	51	1016	1500	769	1067	868	37	51	758.43	1095	968	44	0.04	-4.643	-15.542	1.80216e-54	4.38905e-52	0.0712	0.0197	0.0378	0.0378	TRUE	0.1586								B4GN3_MOUSE	Beta-1,4-N-acetylgalactosaminyltransferase 3;
NVE21527	580	766	387	883	690	21	27	625	758	366	921	664	20	27	482.94	583	792	24	0.04	-4.641	-13.214	7.29046e-40	8.29188e-38	0.0883	0.023	0.0455	0.0455	TRUE	0.225	estExt_fgenesh1_pg.C_630043	242423	NEMVEDRAFT_v1g242423					CO7A1_MOUSE	Collagen alpha-1(VII) chain;	COL12A1	collagen, type XII, alpha 1
NVE15121	277	480	196	288	336	9	17	299	475	185	300	323	9	17	229.71	320	312	13	0.04	-4.656	-10.514	7.44646e-26	3.27148e-24	0.1377	0.033	0.0658	0.0658	TRUE	0.1201	estExt_fgenesh1_pg.C_3580006	247835	NEMVEDRAFT_v1g247835
NVE7126	1293	1900	1240	1844	1862	32	89	1393	1880	1173	1923	1791	30	89	1182.84	1482	1857	60	0.04	-4.642	-9.079	1.09209e-19	3.05866e-18	0.1406	0.0177	0.047	0.1406	TRUE	0.2559	fgenesh1_pg.scaffold_183000029	213743	NEMVEDRAFT_v1g213743
NVE12901	85	156	84	123	140	5	4	92	154	79	128	135	5	4	85.3	108	132	4	0.04	-4.634	-7.798	6.26769e-15	1.1635e-13	0	0.0653	0.0664	0.0664	TRUE	0.9132								BAI3_HUMAN
NVE22151	59	68	55	83	77	3	2	64	67	52	87	74	3	2	49.77	61	80	2	0.04	-4.649	-6.314	2.7206e-10	3.12124e-09	0	0.1019	0.0659	0.0659	TRUE	0.098							mannose receptor, C type 2 precursor [Xenopus (Silurana) tropicalis]	MRC2_HUMAN	C-type mannose receptor 2;		Lectin C-type domain
NVE531	3558	4282	3333	4219	4649	91	222	3835	4238	3154	4400	4471	86	221	2914.9	3742	4436	154	0.041	-4.608	-16.508	3.22422e-61	1.18429e-58	0.1027	0.0155	0.041	0.041	TRUE	0.1534	e_gw.101.138.1	110661	NEMVEDRAFT_v1g110661		sigP:1^17^0.868^YES			PGCA_CANFA			to nematocyst outer wall antigen Hydra magnipapillata
NVE24699	454	687	365	878	1082	17	26	489	680	345	916	1041	16	26	501.82	505	978	21	0.041	-4.591	-13.395	6.43963e-41	7.97162e-39	0.073	0.0227	0.0391	0.0391	TRUE	0.1797	fgenesh1_pm.scaffold_85000002	229557	NEMVEDRAFT_v1g229557		sigP:1^20^0.782^YES			GAPR1_MOUSE	Golgi-associated plant pathogenesis-related protein 1;		GLI pathogenesis-related 2
NVE3873	231	326	164	289	219	5	16	249	323	155	301	211	5	16	179.92	242	256	10	0.042	-4.561	-9.808	1.04232e-22	3.70113e-21	0.1517	0.0383	0.0662	0.0662	TRUE	0.0954					sigP:1^18^0.709^YES			LRP1B_HUMAN	Low-density lipoprotein receptor-related protein 1B;	SORL1	Sortilin-related VPS10 domain containing receptor	GO:0003674,GO:0004871,GO:0004872,GO:0004888,GO:0005488,GO:0005575,GO:0005622,GO:0005623,GO:0005737,GO:0005768,GO:0005770,GO:0005771,GO:0005886,GO:0005887,GO:0006810,GO:0006897,GO:0006898,GO:0006928,GO:0007154,GO:0007165,GO:0008150,GO:0008283,GO:0009987,GO:0016020,GO:0016021,GO:0016192,GO:0016477,GO:0023052,GO:0030169,GO:0031224,GO:0031226,GO:0038023,GO:0040011,GO:0043025,GO:0043226,GO:0043227,GO:…
NVE3006	53	54	29	71	47	1	3	57	53	27	74	45	1	3	37.31	46	60	2	0.042	-4.559	-5.259	1.45048e-07	1.15533e-06	0	0.1312	0.1252	0.1252	TRUE	0.679	fgenesh1_pg.scaffold_13000132	199125	NEMVEDRAFT_v1g199125		sigP:1^25^0.809^YES		Cysteine-rich secretory protein family [Microcoleus sp. PCC 7113]	GAPR1_HUMAN	Golgi-associated plant pathogenesis-related protein 1;		SCP
NVE11693	47	20	35	75	63	2	1	51	20	33	78	61	2	1	35.04	35	70	2	0.042	-4.564	-4.712	2.45574e-06	1.61548e-05	0	0.1388	0.1287	0.1287	TRUE	0.1812								TYR3_CAEEL	Putative tyrosinase-like protein tyr-3;		to astacin family metalloendopeptidase FARM-1 Hydra magnipapillata
NVE15822	8	13	14	14	12	0	1	9	13	13	15	12	0	1	8.84	12	14	0	0.042	-4.575	-2.803	0.00506322	0.0162206	0	0.5089	0.3159	0.3159	TRUE	0.1203	fgenesh1_pg.scaffold_38000071	202841	NEMVEDRAFT_v1g202841				polydom protein [Mus musculus]	SVEP1_MOUSE	Sushi, von Willebrand factor type A, EGF and pentraxin domain-containing protein 1;		HYR domain
NVE1893	5	22	8	13	25	1	0	5	22	8	14	24	1	0	10.47	12	19	0	0.042	-4.579	-2.738	0.00617259	0.0193053	0	0.4319	0.3902	0.3902	TRUE	1.5425	gw.11754.3.1	9859	NEMVEDRAFT_v1g9859					TSP2_CHICK	Thrombospondin-2;		FBG
NVE17241	2906	3599	2406	3206	3464	93	168	3132	3562	2277	3343	3331	88	167	2271.51	2990	3337	128	0.043	-4.551	-18.092	3.68409e-73	3.05725e-70	0.0671	0.0159	0.0318	0.0318	TRUE	0.1952								ISP2_HEMAM	Type-2 ice-structuring protein;		to nematocyst outer wall antigen Hydra magnipapillata
NVE22206	2444	3574	2279	3288	3031	81	164	2634	3537	2157	3429	2915	77	163	2130.21	2776	3172	120	0.043	-4.534	-16.374	2.92716e-60	9.93725e-58	0.0949	0.016	0.0392	0.0392	TRUE	0.1839					sigP:1^16^0.769^YES
NVE8352	741	1036	788	782	892	20	56	799	1025	746	815	858	19	56	616.8	857	836	38	0.043	-4.526	-14.912	2.74521e-50	5.49188e-48	0.103	0.0211	0.037	0.037	TRUE	0.2359	fgenesh1_pg.scaffold_20000100	200262	NEMVEDRAFT_v1g200262				vitrin isoform 1-like protein [Camelus ferus]	VITRN_HUMAN	Vitrin;		collagen, type VI, alpha
NVE3844	15549	16022	10685	17670	13406	357	891	16757	15856	10112	18427	12893	339	886	10752.9	14242	15660	612	0.043	-4.539	-8.979	2.72494e-19	7.37378e-18	0.1463	0.0144	0.0577	0.1463	TRUE	0.5247	fgsh_est.C_scaffold_14000008	232014	NEMVEDRAFT_v1g232014		sigP:1^22^0.845^YES		nematogalectin-related [Aurelia aurita]	LPHN_DROPE	Latrophilin Cirl {ECO:0000250|UniProtKB:A1Z7G7};		Galactose binding lectin domain
NVE25910	133	131	72	142	110	1	9	143	130	68	148	106	1	9	86.41	114	127	5	0.043	-4.538	-7.452	9.21859e-14	1.51876e-12	0.2094	0.0646	0.091	0.091	TRUE	0.8363					sigP:1^19^0.866^YES
NVE3867	86	70	80	72	85	1	6	93	69	76	75	82	1	6	57.34	79	78	4	0.043	-4.536	-7.017	2.27235e-12	3.20821e-11	0.0041	0.0903	0.065	0.065	TRUE	0.1331	fgenesh1_pg.scaffold_14000099	199334	NEMVEDRAFT_v1g199334
NVE14684	46	78	82	77	71	1	5	50	77	78	80	68	1	5	51.27	68	74	3	0.043	-4.544	-6.469	9.89062e-11	1.19337e-09	0.0316	0.0993	0.0792	0.0792	TRUE	0.3274					sigP:1^14^0.719^YES		PKD domain-containing protein [Pontibacter sp. BAB1700]	PKHD1_HUMAN	Fibrocystin;
NVE6182	374	334	194	449	262	5	22	403	331	184	468	252	5	22	237.72	306	360	14	0.043	-4.525	-6.049	1.45753e-09	1.51684e-08	0.2774	0.0324	0.088	0.2774	TRUE	0.2115	gw.17.103.1	34292	NEMVEDRAFT_v1g34292		sigP:1^20^0.827^YES		carboxypeptidase D [Anas platyrhynchos]	CBPD_LOPSP	Carboxypeptidase D;	CPD	Carboxypeptidase	GO:0002165,GO:0003008,GO:0003674,GO:0003824,GO:0004180,GO:0004181,GO:0005488,GO:0005575,GO:0005576,GO:0005622,GO:0005623,GO:0005634,GO:0005737,GO:0005802,GO:0005886,GO:0006508,GO:0006810,GO:0006897,GO:0006909,GO:0007275,GO:0007444,GO:0007472,GO:0007476,GO:0007552,GO:0007560,GO:0007610,GO:0007611,GO:0007613,GO:0007616,GO:0008150,GO:0008152,GO:0008233,GO:0008235,GO:0008237,GO:0008238,GO:0008270,GO:…
NVE6386	20	29	19	24	20	0	2	22	29	18	25	19	0	2	16.36	23	22	1	0.043	-4.543	-3.841	0.000122576	0.000586969	0	0.2815	0.1911	0.1911	TRUE	0.2068	fgenesh1_pg.scaffold_172000022	213239	NEMVEDRAFT_v1g213239		sigP:1^20^0.936^YES		Chain A, Structure Of Neurexin 1 Alpha (Domains Lns1-Lns6), No Splice Inserts	NR3BA_DANRE	Neurexin-3b;	NRX-1	Neurexin	GO:0003008,GO:0003674,GO:0005488,GO:0005515,GO:0005575,GO:0005623,GO:0005886,GO:0006810,GO:0006869,GO:0007154,GO:0007267,GO:0007268,GO:0007274,GO:0007275,GO:0007399,GO:0007416,GO:0007517,GO:0007519,GO:0007528,GO:0007610,GO:0007611,GO:0007612,GO:0008150,GO:0008306,GO:0009888,GO:0009987,GO:0010876,GO:0014706,GO:0016020,GO:0016043,GO:0019226,GO:0022607,GO:0023052,GO:0030154,GO:0031594,GO:0032501,GO:…
NVE7504	3264	3749	3125	4347	5195	199	112	3518	3710	2957	4533	4996	189	111	2859.27	3395	4764	150	0.044	-4.496	-21.519	1.03135e-102	5.77711e-99	0.0376	0.0155	0.0212	0.0212	TRUE	0.1033	e_gw.19.86.1	88668	NEMVEDRAFT_v1g88668		sigP:1^19^0.891^YES		Matrix metalloproteinase-19 [Fukomys damarensis]	MMP19_MOUSE	Matrix metalloproteinase-19;		Matrixin
NVE23274	1057	1432	1275	1470	1952	62	51	1139	1417	1207	1533	1877	59	51	1040.39	1254	1705	55	0.044	-4.515	-20.81	3.5271e-96	1.12897e-92	0.0134	0.0182	0.0162	0.0162	TRUE	0.1033	estExt_fgenesh1_pg.C_750008	242913	NEMVEDRAFT_v1g242913		sigP:1^18^0.87^YES
NVE8567	487	647	412	336	319	27	20	525	640	390	350	307	26	20	322.54	518	328	23	0.044	-4.506	-14.246	4.74779e-46	7.65316e-44	0.0376	0.0275	0.0313	0.0313	TRUE	0.0593	e_gw.203.15.1	123764	NEMVEDRAFT_v1g123764	*		Cnox3	RecName: Full=Homeobox protein BarH-like 1; AltName: Full=BarH-class homeodomain transcription factor 4	BARX1_CHICK	Homeobox protein BarH-like 1;	BSX	brain-specific homeobox	GO:0001071,GO:0003674,GO:0003676,GO:0003677,GO:0003700,GO:0005488,GO:0005575,GO:0005622,GO:0005623,GO:0005634,GO:0005654,GO:0005667,GO:0005737,GO:0006355,GO:0006357,GO:0007275,GO:0007399,GO:0007417,GO:0007420,GO:0007610,GO:0007626,GO:0007631,GO:0008150,GO:0009653,GO:0009889,GO:0009891,GO:0009893,GO:0009987,GO:0010468,GO:0010556,GO:0010557,GO:0010604,GO:0010628,GO:0019219,GO:0019222,GO:0022008,GO:…
NVE17476	432	430	263	500	331	8	26	466	426	249	521	318	8	26	287.6	380	420	17	0.044	-4.513	-10.738	6.77151e-27	3.22128e-25	0.1911	0.0292	0.0657	0.0657	TRUE	0.7023	estExt_fgenesh1_pg.C_4330005	248162	NEMVEDRAFT_v1g248162		sigP:1^18^0.934^YES
NVE2901	1740	1870	1232	1791	1671	36	111	1875	1851	1166	1868	1607	34	110	1215.87	1631	1738	72	0.044	-4.497	-8.215	2.12692e-16	4.59555e-15	0.1644	0.0176	0.0575	0.1644	TRUE	0.5004	estExt_fgenesh1_pg.C_130011	239209	NEMVEDRAFT_v1g239209
NVE26144	21	110	2	18	2	1	3	23	109	2	19	2	1	3	22.57	45	10	2	0.044	-4.506	-3.416	0.000634433	0.00257987	1.5849	0.2078	0.6958	0.6958	TRUE	0.3088							aminoacyl tRNA synthase complex-interacting multifunctional protein 2 [Cricetulus griseus]	AIMP2_CRIGR	Aminoacyl tRNA synthase complex-interacting multifunctional protein 2;	AIMP2	Aminoacyl tRNA synthetase complex-interacting multifunctional protein 2	GO:0005575,GO:0005622,GO:0005623,GO:0005634,GO:0005737,GO:0005829,GO:0006082,GO:0006139,GO:0006399,GO:0006412,GO:0006418,GO:0006520,GO:0006725,GO:0006807,GO:0007275,GO:0008150,GO:0008152,GO:0008285,GO:0009058,GO:0009059,GO:0009888,GO:0009893,GO:0009987,GO:0010467,GO:0010604,GO:0016070,GO:0017101,GO:0019222,GO:0019538,GO:0019752,GO:0030154,GO:0030323,GO:0030324,GO:0030855,GO:0031323,GO:0031325,GO:…
NVE21615	13	11	9	10	10	0	1	14	11	9	10	10	0	1	7.78	11	10	0	0.044	-4.513	-2.731	0.0063157	0.0196568	0	0.5763	0.3528	0.3528	TRUE	0.1047								PRY1_YEAST	Protein PRY1 {ECO:0000305};		GLI pathogenesis-related 2	GO:0005575,GO:0005576
NVE7488	9	13	11	16	5	1	0	10	13	10	17	5	1	0	7.92	11	11	0	0.044	-4.503	-2.67	0.00758264	0.022928	0	0.5666	0.4155	0.4155	TRUE	0.0558							transient receptor potential cation channel subfamily A member 1 [Eryx tataricus]	TRPA1_HUMAN	Transient receptor potential cation channel subfamily A member 1;	TRPA1	Transient receptor potential cation channel subfamily A member	GO:0000003,GO:0000302,GO:0001580,GO:0003008,GO:0003674,GO:0005215,GO:0005216,GO:0005261,GO:0005262,GO:0005575,GO:0005622,GO:0005623,GO:0005886,GO:0005887,GO:0006810,GO:0006811,GO:0006812,GO:0006816,GO:0006950,GO:0006979,GO:0007600,GO:0007606,GO:0007610,GO:0007611,GO:0007613,GO:0007622,GO:0007623,GO:0007638,GO:0008150,GO:0008324,GO:0008381,GO:0009266,GO:0009408,GO:0009409,GO:0009581,GO:0009582,GO:…
NVE160	4044	5523	3268	7199	6621	122	270	4358	5466	3093	7507	6367	116	269	3882.28	4306	6937	192	0.045	-4.487	-15.199	3.59582e-52	7.74692e-50	0.1173	0.0151	0.0471	0.0471	TRUE	0.1196	fgenesh1_pg.scaffold_1000194	196263	NEMVEDRAFT_v1g196263		sigP:1^17^0.905^YES						MAC/Perforin domain
NVE22714	123	194	135	154	126	4	10	133	192	128	161	121	4	10	106.83	151	141	7	0.045	-4.466	-9.037	1.60492e-19	4.42855e-18	0.0475	0.0549	0.0527	0.0527	TRUE	0.4021								HECD1_HUMAN	E3 ubiquitin-protein ligase HECTD1;
NVE25772	2548	4908	1871	3359	4571	85	199	2746	4857	1771	3503	4396	81	198	2507.33	3125	3950	140	0.045	-4.488	-7.222	5.10673e-13	7.71553e-12	0.2183	0.0157	0.0738	0.2183	TRUE	0.2491	estExt_fgenesh1_pg.C_940026	243657	NEMVEDRAFT_v1g243657		sigP:1^22^0.821^YES
NVE18959	15927	18858	16732	17795	20927	507	1107	17165	18663	15835	18557	20126	482	1101	13132.5	17221	19342	792	0.046	-4.444	-17.261	9.26397e-67	5.32227e-64	0.08	0.0143	0.0375	0.0375	TRUE	0.0438					sigP:1^17^0.806^YES
NVE11345	378	456	414	292	335	16	23	407	451	392	305	322	15	23	273.6	417	314	19	0.046	-4.457	-14.958	1.38345e-50	2.81796e-48	0	0.03	0.0195	0.0195	TRUE	0.0405	e_gw.26.228.1	90956	NEMVEDRAFT_v1g90956	*		HoxB/Anthox6a	homeodomain protein HoxD3a [Hypophthalmichthys nobilis]	HXD3A_DANRE	Homeobox protein Hox-D3a;	HOXA2	Homeobox A2	GO:0000122,GO:0000902,GO:0000904,GO:0001071,GO:0001501,GO:0001503,GO:0001649,GO:0001709,GO:0002076,GO:0003002,GO:0003674,GO:0003676,GO:0003677,GO:0003700,GO:0005488,GO:0005575,GO:0005622,GO:0005623,GO:0005634,GO:0006355,GO:0006357,GO:0006928,GO:0006935,GO:0007275,GO:0007350,GO:0007379,GO:0007380,GO:0007381,GO:0007382,GO:0007389,GO:0007399,GO:0007409,GO:0007411,GO:0007417,GO:0007420,GO:0007423,GO:…
NVE5855	475	602	871	1029	1848	32	29	512	596	824	1073	1777	30	29	691.64	644	1425	30	0.046	-4.442	-14.137	2.25828e-45	3.39591e-43	0.0651	0.0203	0.0366	0.0366	TRUE	0.473	estExt_fgenesh1_pg.C_1650034	245535	NEMVEDRAFT_v1g245535
NVE4872	412	448	377	496	462	9	30	444	443	357	517	444	9	30	320.58	415	480	20	0.046	-4.444	-13.235	5.50878e-40	6.29744e-38	0.0839	0.0276	0.0334	0.0334	TRUE	0.1159	e_gw.15140.2.1	157231	NEMVEDRAFT_v1g157231				GD16490 [Drosophila simulans]	GGT1_MOUSE	Gamma-glutamyltranspeptidase 1;		Gamma-glutamyltransferase
NVE25816	532	686	437	675	593	13	39	573	679	414	704	570	12	39	427.31	555	637	26	0.046	-4.448	-12.784	2.00942e-37	2.00103e-35	0.1293	0.0242	0.0461	0.0461	TRUE	0.1319					sigP:1^22^0.698^YES						GDSL-like Lipase/Acylhydrolase
NVE11561	95	179	109	143	182	2	10	102	177	103	149	175	2	10	102.67	127	162	6	0.046	-4.445	-8.185	2.72626e-16	5.83424e-15	0.1071	0.0566	0.0673	0.0673	TRUE	0.7916
NVE9849	131	175	75	95	107	4	8	141	173	71	99	103	4	8	85.58	128	101	6	0.046	-4.456	-7.844	4.37691e-15	8.26888e-14	0.1193	0.0651	0.0832	0.0832	TRUE	0.1795
NVE10714	35	77	48	22	32	3	2	38	76	45	23	31	3	2	31.13	53	27	2	0.046	-4.453	-5.523	3.32463e-08	2.89513e-07	0	0.1545	0.1269	0.1269	TRUE	0.4229	gw.247.36.1	18799	NEMVEDRAFT_v1g18799		sigP:1^20^0.824^YES			CSL3_ONCKE	L-rhamnose-binding lectin CSL3 {ECO:0000303|Ref.1};	EVA1C	eva-1 homolog C (C. elegans)
NVE23806	30	52	11	34	22	2	1	32	51	10	35	21	2	1	21.96	31	28	2	0.046	-4.43	-4.121	3.77037e-05	0.000199478	0	0.2132	0.2526	0.2526	TRUE	0.0738					sigP:1^21^0.809^YES		Agrin [Pteropus alecto]	AGRIN_RAT	Agrin;	AGRN	K06254 agrin	GO:0000323,GO:0000902,GO:0000904,GO:0001932,GO:0001934,GO:0001948,GO:0002162,GO:0003002,GO:0003008,GO:0003674,GO:0005198,GO:0005200,GO:0005488,GO:0005509,GO:0005515,GO:0005539,GO:0005575,GO:0005576,GO:0005578,GO:0005604,GO:0005605,GO:0005615,GO:0005622,GO:0005623,GO:0005737,GO:0005764,GO:0005773,GO:0005775,GO:0005794,GO:0005796,GO:0005886,GO:0005975,GO:0006022,GO:0006023,GO:0006024,GO:0006026,GO:…
NVE18157	30	17	15	27	12	1	1	32	17	14	28	12	1	1	15	21	20	1	0.046	-4.437	-3.593	0.000326834	0.00141727	0	0.3056	0.2601	0.2601	TRUE	0.7697	gw.4636.2.1	8835	NEMVEDRAFT_v1g8835					CBPE_PANTR	Carboxypeptidase E;	CPD	Carboxypeptidase	GO:0002165,GO:0003008,GO:0003674,GO:0003824,GO:0004180,GO:0004181,GO:0005488,GO:0005575,GO:0005576,GO:0005622,GO:0005623,GO:0005634,GO:0005737,GO:0005802,GO:0005886,GO:0006508,GO:0006810,GO:0006897,GO:0006909,GO:0007275,GO:0007444,GO:0007472,GO:0007476,GO:0007552,GO:0007560,GO:0007610,GO:0007611,GO:0007613,GO:0007616,GO:0008150,GO:0008152,GO:0008233,GO:0008235,GO:0008237,GO:0008238,GO:0008270,GO:…
NVE15651	1143	1324	853	1223	1104	44	63	1232	1310	807	1275	1062	42	63	827.27	1116	1168	52	0.047	-4.42	-16.492	4.19877e-61	1.51738e-58	0.05	0.0193	0.0299	0.0299	TRUE	0.4705	estExt_fgenesh1_pg.C_3750007	247901	NEMVEDRAFT_v1g247901		sigP:1^16^0.785^YES
NVE3839	1523	2168	1468	2226	2098	54	112	1641	2146	1389	2321	2018	51	111	1382.55	1725	2170	81	0.047	-4.41	-16.072	3.98275e-58	1.14407e-55	0.0887	0.0171	0.036	0.036	TRUE	0.2192	fgenesh1_pg.scaffold_14000067	199302	NEMVEDRAFT_v1g199302		sigP:1^19^0.783^YES			LPHN_DROPE	Latrophilin Cirl {ECO:0000250|UniProtKB:A1Z7G7};		Galactose binding lectin domain
NVE18961	1021	1646	1281	1315	1362	35	92	1100	1629	1212	1371	1310	33	91	963.93	1314	1340	62	0.047	-4.401	-14.568	4.51534e-48	8.29268e-46	0.1227	0.0185	0.0429	0.0429	TRUE	0.3527	estExt_fgenesh1_pg.C_50081	238344	NEMVEDRAFT_v1g238344		sigP:1^18^0.825^YES						collagen, type
NVE899	748	1199	698	1054	961	29	57	806	1187	661	1099	924	28	57	680.12	885	1012	42	0.047	-4.396	-14.186	1.12348e-45	1.74811e-43	0.0975	0.0204	0.041	0.041	TRUE	0.3137					sigP:1^17^0.76^YES
NVE17162	193	290	194	257	233	5	17	208	287	184	268	224	5	17	170.33	226	246	11	0.047	-4.397	-10.416	2.09381e-25	8.90205e-24	0.0759	0.0397	0.0466	0.0466	TRUE	0.4082							Gamma-glutamyltranspeptidase family-containing protein 3 [Strongyloides ratti]	GGT1_PIG	Gamma-glutamyltranspeptidase 1;		Gamma-glutamyltransferase
NVE17846	124	186	126	177	159	2	12	134	184	119	185	153	2	12	112.61	146	169	7	0.047	-4.413	-8.806	1.30089e-18	3.33116e-17	0.0801	0.0528	0.0567	0.0567	TRUE	0.373	fgenesh1_pg.scaffold_45000043	203744	NEMVEDRAFT_v1g203744				N-acetylated-alpha-linked acidic dipeptidase 2 [Crassostrea gigas]	FOLH1_HUMAN	Glutamate carboxypeptidase 2;	NAALADL1	N-acetylated alpha-linked acidic	GO:0001505,GO:0003008,GO:0003674,GO:0003824,GO:0004180,GO:0004181,GO:0005575,GO:0005622,GO:0005623,GO:0005634,GO:0005737,GO:0005886,GO:0005887,GO:0006082,GO:0006508,GO:0006520,GO:0006575,GO:0006725,GO:0006732,GO:0006760,GO:0006807,GO:0007154,GO:0007267,GO:0007268,GO:0008150,GO:0008152,GO:0008233,GO:0008235,GO:0008236,GO:0008237,GO:0008238,GO:0008239,GO:0009056,GO:0009987,GO:0016020,GO:0016021,GO:…
NVE9418	143	186	102	196	186	2	12	154	184	97	204	179	2	12	118.83	145	192	7	0.047	-4.404	-8.497	1.94873e-17	4.53408e-16	0.1485	0.0508	0.0669	0.0669	TRUE	0.2199	e_gw.22.138.1	89764	NEMVEDRAFT_v1g89764		sigP:1^22^0.89^YES			PBMU2_HUMAN	Protein PBMUCL2;
NVE350	1767	1931	1245	2107	1648	43	115	1904	1911	1178	2197	1585	41	114	1275.84	1664	1891	78	0.047	-4.424	-8.454	2.80366e-17	6.47617e-16	0.1501	0.0174	0.0549	0.1501	TRUE	0.5261	estExt_fgenesh1_pg.C_100115	238967	NEMVEDRAFT_v1g238967				LOC496099 protein [Xenopus laevis]	GGHA_DICDI	Gamma-glutamyl hydrolase A;	GGH	Gamma-glutamyl hydrolase (Conjugase, folylpolygammaglutamyl hydrolase)	GO:0000323,GO:0003674,GO:0003824,GO:0005575,GO:0005576,GO:0005615,GO:0005622,GO:0005623,GO:0005737,GO:0005764,GO:0005773,GO:0005829,GO:0006082,GO:0006520,GO:0006575,GO:0006725,GO:0006732,GO:0006760,GO:0006807,GO:0008150,GO:0008152,GO:0008233,GO:0008238,GO:0008242,GO:0009719,GO:0009725,GO:0009987,GO:0010033,GO:0010035,GO:0010038,GO:0010043,GO:0010243,GO:0016023,GO:0016787,GO:0019752,GO:0031410,GO:…
NVE15733	1869	1602	1061	2252	1206	40	107	2014	1585	1004	2348	1160	38	106	1179.49	1534	1754	72	0.047	-4.41	-7.063	1.62683e-12	2.33359e-11	0.2164	0.0177	0.0755	0.2164	TRUE	0.1109					sigP:1^18^0.774^YES		protein disulfide isomerase [Ancylostoma caninum]	PDIA4_HUMAN	Protein disulfide-isomerase A4;		Protein disulfide isomerase family A, member
NVE19827	64	67	54	81	89	1	5	69	66	51	84	86	1	5	51.77	62	85	3	0.047	-4.408	-6.389	1.67489e-10	1.96274e-09	0	0.0985	0.0685	0.0685	TRUE	0.1442	e_gw.53.291.1	99578	NEMVEDRAFT_v1g99578					SVMI1_CERCE	Snake venom metalloprotease inhibitor 02A10;		GDSL-like Lipase/Acylhydrolase
NVE4965	319	352	167	452	243	4	23	344	348	158	471	234	4	23	225.99	283	352	14	0.047	-4.413	-5.215	1.84167e-07	1.44635e-06	0.3676	0.0333	0.1065	0.3676	TRUE	1.1295	e_gw.153.128.1	118459	NEMVEDRAFT_v1g118459				Protein NAS-39 [Caenorhabditis elegans]	VMP_NEMVE	Nematocyst expressed protein 6 {ECO:0000303|PubMed:23151943};	ASTL	astacin-like metalloendopeptidase (M12 family)	GO:0000003,GO:0001775,GO:0003674,GO:0003824,GO:0004175,GO:0004222,GO:0005575,GO:0005622,GO:0005623,GO:0005737,GO:0005886,GO:0006508,GO:0006810,GO:0006897,GO:0006909,GO:0007155,GO:0007275,GO:0007338,GO:0007343,GO:0008150,GO:0008152,GO:0008233,GO:0008237,GO:0009566,GO:0009893,GO:0009987,GO:0010468,GO:0010604,GO:0010954,GO:0016020,GO:0016021,GO:0016023,GO:0016192,GO:0016787,GO:0017090,GO:0019222,GO:…
NVE22707	32	32	29	33	28	3	0	34	32	27	34	27	3	0	22.54	31	30	2	0.047	-4.424	-4.517	6.27899e-06	3.86397e-05	0	0.208	0.1386	0.1386	TRUE	0.0519
NVE23051	2206	2772	1988	2576	2316	78	152	2377	2743	1881	2686	2227	74	151	1734.43	2334	2456	112	0.048	-4.375	-16.893	5.02753e-64	2.25294e-61	0.0751	0.0165	0.0333	0.0333	TRUE	0.1039	estExt_fgenesh1_pg.C_730090	242848	NEMVEDRAFT_v1g242848		sigP:1^19^0.815^YES
NVE5549	534	643	416	509	429	16	37	576	636	394	531	413	15	37	371.56	535	472	26	0.048	-4.37	-13.021	9.34691e-39	1.01663e-36	0.0887	0.0257	0.0416	0.0416	TRUE	0.3262	fgenesh1_pg.scaffold_160000022	212657	NEMVEDRAFT_v1g212657		sigP:1^22^0.829^YES		nematogalectin [Hydra oligactis]				Galactose binding lectin domain
NVE8197	295	467	303	545	808	20	15	318	462	287	568	777	19	15	349.45	356	672	17	0.048	-4.388	-12.542	4.38648e-36	4.02801e-34	0.0503	0.0265	0.0351	0.0351	TRUE	0.5256	e_gw.2.301.1	79661	NEMVEDRAFT_v1g79661		sigP:1^19^0.87^YES		cell surface protein [Escherichia coli]
NVE18169	164	151	139	203	158	2	13	177	149	132	212	152	2	13	119.46	153	182	8	0.048	-4.38	-9.007	2.1118e-19	5.76334e-18	0.0834	0.0506	0.0541	0.0541	TRUE	0.1326	estExt_fgenesh1_pg.C_4650004	248216	NEMVEDRAFT_v1g248216
NVE15526	80	114	80	82	80	2	7	86	113	76	86	77	2	7	63.72	92	82	4	0.048	-4.384	-7.415	1.21982e-13	1.97623e-12	0.0227	0.0826	0.0642	0.0642	TRUE	0.266					sigP:1^22^0.795^YES		cathepsin Llike proteinase [Acanthamoeba castellanii str. Neff]				Cathepsin propeptide inhibitor domain (I29)
NVE14976	58	90	32	88	49	2	4	63	89	30	92	47	2	4	46.66	61	70	3	0.048	-4.373	-5.617	1.93983e-08	1.74623e-07	0.2106	0.1077	0.1433	0.1433	TRUE	0.0966							toxin [Actineria villosa]
NVE967	42	54	24	61	36	2	2	45	53	23	64	35	2	2	31.93	40	50	2	0.048	-4.378	-4.918	8.76186e-07	6.19301e-06	0	0.151	0.147	0.147	TRUE	0.3876					sigP:1^23^0.868^YES
NVE14724	15	4	11	15	11	0	1	16	4	10	16	11	0	1	8.25	10	14	0	0.048	-4.381	-2.592	0.00954575	0.0279621	0	0.5442	0.4223	0.4223	TRUE	0.0964	fgenesh1_pg.scaffold_3459000001	223865	NEMVEDRAFT_v1g223865				Putative phospholipase B-like 1 [Crassostrea gigas]	PLB_DRYCN	Phospholipase-B 81;
NVE3843	3082	3227	2194	3414	2679	87	201	3322	3194	2076	3560	2576	83	200	2144.37	2864	3068	142	0.049	-4.343	-14.249	4.54254e-46	7.37537e-44	0.1236	0.016	0.0493	0.0493	TRUE	0.4689	fgsh_est.C_scaffold_14000007	232013	NEMVEDRAFT_v1g232013		sigP:1^26^0.657^YES			CSL1_ONCKE	L-rhamnose-binding lectin CSL1 {ECO:0000303|Ref.1};		Galactose binding lectin domain
NVE8011	293	466	371	339	527	24	14	316	461	351	354	507	23	14	289.3	376	430	18	0.049	-4.352	-12.715	4.87947e-37	4.69225e-35	0.046	0.0291	0.0348	0.0348	TRUE	0.3005	fgenesh1_pg.scaffold_2000021	196399	NEMVEDRAFT_v1g196399				hypothetical protein [Clostridiales bacterium 1_7_47FAA]
NVE26013	320	378	248	329	281	10	22	345	374	235	343	270	10	22	228.34	318	306	16	0.049	-4.348	-11.673	1.75749e-31	1.16504e-29	0.0633	0.0331	0.0414	0.0414	TRUE	0.4006					sigP:1^20^0.75^YES		lipoxygenase [Actineria villosa]	LOX5_HUMAN	Arachidonate 5-lipoxygenase;		Lipoxygenase
NVE11311	166	243	187	409	422	9	11	179	240	177	427	406	9	11	206.89	199	416	10	0.049	-4.354	-11.03	2.75071e-28	1.42999e-26	0	0.0351	0.0278	0.0278	TRUE	0.2451					sigP:1^19^0.69^YES
NVE3841	110	136	76	186	132	4	7	119	135	72	194	127	4	7	93.82	109	160	6	0.049	-4.337	-7.738	1.01133e-14	1.84376e-13	0.084	0.0606	0.0685	0.0685	TRUE	0.4946	estExt_fgenesh1_pg.C_140069	239380	NEMVEDRAFT_v1g239380
NVE258	27	56	36	42	45	3	1	29	55	34	44	43	3	1	29.93	39	44	2	0.049	-4.351	-5.018	5.23152e-07	3.83314e-06	0	0.1601	0.1226	0.1226	TRUE	0.6203	fgenesh1_pg.scaffold_10000001	198409	NEMVEDRAFT_v1g198409
NVE10706	27	33	29	37	23	2	1	29	33	27	39	22	2	1	21.83	30	30	2	0.049	-4.352	-4.419	9.90438e-06	5.85959e-05	0	0.2144	0.1451	0.1451	TRUE	0.0332	gw.247.8.1	11296	NEMVEDRAFT_v1g11296				Solute carrier organic anion transporter family member 4A1 [Zootermopsis nevadensis]	SO4A1_MOUSE	Solute carrier organic anion transporter family member 4A1;	SLCO4A1	Solute carrier organic anion transporter family member	GO:0003333,GO:0003674,GO:0005215,GO:0005342,GO:0005575,GO:0005623,GO:0005886,GO:0006082,GO:0006520,GO:0006575,GO:0006725,GO:0006807,GO:0006810,GO:0006811,GO:0006820,GO:0006865,GO:0008150,GO:0008152,GO:0008509,GO:0008514,GO:0009914,GO:0009987,GO:0010817,GO:0015075,GO:0015171,GO:0015291,GO:0015349,GO:0015711,GO:0015849,GO:0016020,GO:0016021,GO:0016323,GO:0018958,GO:0019752,GO:0022804,GO:0022857,GO:…
NVE17463	20	22	17	22	27	1	1	22	22	16	23	26	1	1	15.75	20	24	1	0.049	-4.347	-3.696	0.000218868	0.000992503	0	0.2917	0.1772	0.1772	TRUE	0.1018
NVE534	3	15	12	12	21	0	1	3	15	11	13	20	0	1	9.02	10	16	0	0.049	-4.339	-2.575	0.0100157	0.029099	0	0.499	0.4105	0.4105	TRUE	0.3612	fgenesh1_pg.scaffold_101000030	209103	NEMVEDRAFT_v1g209103
NVE24293	467	789	507	698	747	31	29	503	781	480	728	718	29	29	466.93	588	723	29	0.05	-4.334	-14.65	1.34277e-48	2.52825e-46	0.04	0.0233	0.0298	0.0298	TRUE	0.6458
NVE33	393	518	352	529	438	13	30	424	513	333	552	421	12	30	326.34	423	486	21	0.05	-4.333	-12.729	4.07126e-37	3.94894e-35	0.0713	0.0274	0.0381	0.0381	TRUE	0.0752					sigP:1^20^0.921^YES
NVE6183	547	571	365	713	503	15	36	590	565	345	744	484	14	36	396.76	500	614	25	0.05	-4.326	-11.914	1.00108e-32	7.37834e-31	0.1289	0.025	0.0518	0.0518	TRUE	0.5719	gw.17.77.1	33556	NEMVEDRAFT_v1g33556				RecName: Full=Carboxypeptidase D; AltName: Full=CPD-2; AltName: Full=Metallocarboxypeptidase D, partial [Lophonetta specularioides]	CBPD_LOPSP	Carboxypeptidase D;	CPD	Carboxypeptidase	GO:0002165,GO:0003008,GO:0003674,GO:0003824,GO:0004180,GO:0004181,GO:0005488,GO:0005575,GO:0005576,GO:0005622,GO:0005623,GO:0005634,GO:0005737,GO:0005802,GO:0005886,GO:0006508,GO:0006810,GO:0006897,GO:0006909,GO:0007275,GO:0007444,GO:0007472,GO:0007476,GO:0007552,GO:0007560,GO:0007610,GO:0007611,GO:0007613,GO:0007616,GO:0008150,GO:0008152,GO:0008233,GO:0008235,GO:0008237,GO:0008238,GO:0008270,GO:…
NVE23229	320	357	254	510	386	9	23	345	353	240	532	371	9	23	267.58	313	452	16	0.05	-4.324	-11.542	8.13527e-31	5.0633e-29	0.0808	0.0303	0.0423	0.0423	TRUE	0.3134					sigP:1^24^0.464^YES
NVE10337	9	12	8	14	4	0	1	10	12	8	15	4	0	1	6.94	10	10	0	0.05	-4.317	-2.513	0.0119818	0.0338926	0	0.6443	0.4755	0.4755	TRUE	0.0853					sigP:1^24^0.613^YES
NVE15166	9	8	12	5	1	1	0	10	8	11	5	1	1	0	5.16	10	3	0	0.05	-4.317	-2.424	0.0153435	0.0417317	0	0.8623	0.5987	0.5987	TRUE	0.0574
NVE23810	7141	8926	7365	12809	16821	443	377	7696	8833	6970	13358	16177	421	375	7689.96	7833	14768	398	0.051	-4.299	-26.225	1.36872e-151	3.06676e-147	0.012	0.0145	0.014	0.014	TRUE	0.1017	e_gw.79.159.1	105779	NEMVEDRAFT_v1g105779		sigP:1^18^0.742^YES		PREDICTED: chymotrypsin-like protease CTRL-1 [Cricetulus griseus]	CTRB_BOVIN	Chymotrypsinogen B;	CTRC	chymotrypsin-like elastase family member	GO:0003674,GO:0003824,GO:0004175,GO:0004252,GO:0005575,GO:0005576,GO:0005615,GO:0006066,GO:0006508,GO:0006629,GO:0007586,GO:0008150,GO:0008152,GO:0008202,GO:0008203,GO:0008233,GO:0008236,GO:0016125,GO:0016787,GO:0017171,GO:0019538,GO:0032501,GO:0043170,GO:0044238,GO:0044281,GO:0044421,GO:0044699,GO:0044707,GO:0044710,GO:0070011,GO:0071704,GO:1901360,GO:1901615
NVE20094	1231	1283	1072	1574	1632	57	69	1327	1270	1014	1641	1569	54	69	992.08	1204	1605	62	0.051	-4.295	-20.22	6.55388e-91	1.33497e-87	0.0128	0.0184	0.0162	0.0162	TRUE	0.1518	estExt_fgenesh1_pg.C_550017	241995	NEMVEDRAFT_v1g241995		sigP:1^20^0.867^YES
NVE161	4537	5722	3718	4990	4285	171	319	4890	5663	3519	5204	4121	162	317	3410.75	4691	4662	240	0.051	-4.29	-16.195	5.47877e-59	1.65888e-56	0.0832	0.0153	0.0379	0.0379	TRUE	0.1491	fgenesh1_pg.scaffold_1000195	196264	NEMVEDRAFT_v1g196264								MAC/Perforin domain
NVE20741	303	405	330	361	424	11	25	327	401	312	376	408	10	25	265.6	347	392	18	0.051	-4.304	-13.142	1.89897e-39	2.1381e-37	0.017	0.0304	0.0274	0.0274	TRUE	0.1433	fgenesh1_pg.scaffold_59000004	205377	NEMVEDRAFT_v1g205377				Xaa-Pro aminopeptidase 1 [Crassostrea gigas]	XPP1_BOVIN	Xaa-Pro aminopeptidase 1;	XPNPEP1	X-prolyl aminopeptidase (Aminopeptidase P)	GO:0003674,GO:0003824,GO:0004177,GO:0005488,GO:0005575,GO:0005622,GO:0005623,GO:0005737,GO:0005829,GO:0006508,GO:0006518,GO:0006807,GO:0008150,GO:0008152,GO:0008233,GO:0008235,GO:0008237,GO:0008238,GO:0009056,GO:0009987,GO:0010815,GO:0016787,GO:0019538,GO:0030145,GO:0034641,GO:0043167,GO:0043169,GO:0043170,GO:0043171,GO:0043603,GO:0044237,GO:0044238,GO:0044248,GO:0044424,GO:0044444,GO:0044464,GO:…
NVE9378	244	318	231	256	304	7	21	263	315	219	267	292	7	21	197.59	266	280	14	0.051	-4.28	-11.344	7.93884e-30	4.58448e-28	0.0464	0.0361	0.0379	0.0379	TRUE	0.0854					sigP:1^16^0.566^YES						WSC domain
NVE19037	3725	4802	3949	4953	5058	113	323	4014	4752	3737	5165	4864	107	321	3280.28	4168	5014	214	0.051	-4.282	-8.914	4.93077e-19	1.3121e-17	0.1302	0.0153	0.0512	0.1302	TRUE	0.1221					sigP:1^18^0.686^YES
NVE26114	91	118	77	127	97	5	5	98	117	73	132	93	5	5	74.74	96	112	5	0.051	-4.302	-7.576	3.56837e-14	6.10794e-13	0	0.0725	0.0617	0.0617	TRUE	0.1176							kinesin family member 17, isoform CRA_b [Mus musculus]	KIF17_MOUSE	Kinesin-like protein KIF17;	KIF17	kinesin family member 17	GO:0000902,GO:0001654,GO:0001754,GO:0003674,GO:0003774,GO:0003777,GO:0003824,GO:0005575,GO:0005622,GO:0005623,GO:0005737,GO:0005815,GO:0005856,GO:0005871,GO:0005875,GO:0005929,GO:0005930,GO:0005932,GO:0006810,GO:0006928,GO:0007017,GO:0007018,GO:0007275,GO:0007399,GO:0007423,GO:0007568,GO:0008104,GO:0008150,GO:0008152,GO:0008340,GO:0008569,GO:0008574,GO:0009653,GO:0009887,GO:0009966,GO:0009987,GO:…
NVE4719	1107	1408	897	1471	1452	48	74	1193	1393	849	1534	1396	46	74	926.42	1145	1465	60	0.052	-4.267	-16.353	4.15289e-60	1.3888e-57	0.0482	0.0187	0.0291	0.0291	TRUE	0.1762	e_gw.15.9.1,gw.15.234.1	87270.6	NEMVEDRAFT_v1g87270,NEMVEDRAFT_v1g63017		sigP:1^28^0.723^YES		ADAM metallopeptidase with thrombospondin type 1 motif, 12, isoform CRA_a [Homo sapiens]	ATS16_HUMAN	A disintegrin and metalloproteinase with thrombospondin motifs 16;	ADAMTS18	ADAM metallopeptidase with thrombospondin type 1, motif	GO:0005575,GO:0005576,GO:0005578,GO:0031012,GO:0044421
NVE6863	7244	10432	8659	8045	9068	285	647	7807	10324	8195	8390	8721	271	643	6335.71	8775	8556	457	0.052	-4.263	-15.708	1.34009e-55	3.53249e-53	0.0939	0.0147	0.0412	0.0412	TRUE	0.1941	estExt_fgenesh1_pg.C_180037	239676	NEMVEDRAFT_v1g239676		sigP:1^19^0.845^YES
NVE17163	360	556	345	469	419	19	26	388	550	326	489	403	18	26	314.38	421	446	22	0.052	-4.266	-12.923	3.35292e-38	3.49421e-36	0.0486	0.0279	0.0353	0.0353	TRUE	0.3024	gw.4200.3.1	3418	NEMVEDRAFT_v1g3418				gamma-glutamyl transferase 1a [Oryzias latipes]	GGT1_PIG	Gamma-glutamyltranspeptidase 1;		Gamma-glutamyltransferase
NVE7098	81	90	83	97	96	1	8	87	89	79	101	92	1	8	65.33	85	96	4	0.052	-4.274	-7.332	2.26522e-13	3.56422e-12	0	0.0809	0.0584	0.0584	TRUE	0.0283	fgenesh1_pg.scaffold_18279000001	226089	NEMVEDRAFT_v1g226089				arylsulfatase A [Rhodopirellula sp. SWK7]				Inherit from opiNOG: Inulinase
NVE159	466	629	359	778	744	11	41	502	622	340	811	716	10	41	434.64	488	764	26	0.052	-4.255	-6.868	6.50919e-12	8.82839e-11	0.1977	0.024	0.0582	0.1977	TRUE	0.1484
NVE661	7	9	12	5	11	1	0	8	9	11	5	11	1	0	6.36	9	8	0	0.052	-4.259	-2.499	0.012465	0.0350472	0	0.7014	0.4439	0.4439	TRUE	0.0897	fgenesh1_pg.scaffold_10200000001	225663	NEMVEDRAFT_v1g225663				tetratricopeptide repeat domain protein [Coleofasciculus chthonoplastes]
NVE7482	1582	1767	1659	898	790	75	106	1705	1749	1570	936	760	71	105	985.22	1675	848	88	0.053	-4.247	-20.864	1.14831e-96	4.28818e-93	0.0142	0.0184	0.017	0.017	TRUE	0.0241	fgenesh1_pg.scaffold_19000050	200058	NEMVEDRAFT_v1g200058		sigP:1^15^0.831^YES		RecName: Full=Toxin AvTX-60A; Flags: Precursor	TX60B_PHYSE	DELTA-alicitoxin-Pse2b {ECO:0000303|PubMed:22683676};
NVE10949	1329	1697	1340	1379	1529	59	99	1432	1679	1268	1438	1470	56	98	1063.26	1460	1454	77	0.053	-4.243	-18.625	2.02809e-77	2.39165e-74	0.0322	0.0181	0.0221	0.0221	TRUE	0.117	estExt_gwp.C_2510018	173414	NEMVEDRAFT_v1g173414					FBP1_STRPU	Fibropellin-1;		Notch ligand involved in the mediation of Notch signaling (By similarity)	GO:0005575,GO:0016020
NVE17360	1450	1980	1442	1715	1409	70	108	1563	1959	1365	1788	1355	67	107	1172.03	1629	1572	87	0.053	-4.23	-17.346	2.12191e-67	1.28496e-64	0.0479	0.0177	0.0273	0.0273	TRUE	0.1777	estExt_gwp.C_430165	163734	NEMVEDRAFT_v1g163734				beta-tubulin [Dictyocaulus viviparus]	TBB2_CAEEL	Tubulin beta-2 chain;	TUBB6	Tubulin is the major constituent of microtubules. It binds two moles of GTP, one at an exchangeable site on the beta chain and one at a non-exchangeable site on the alpha chain (By similarity)	GO:0005575,GO:0005622,GO:0005623,GO:0005737,GO:0005856,GO:0005874,GO:0005886,GO:0006457,GO:0006458,GO:0008150,GO:0008152,GO:0009987,GO:0015630,GO:0016020,GO:0019538,GO:0032991,GO:0043170,GO:0043226,GO:0043228,GO:0043229,GO:0043232,GO:0043234,GO:0044237,GO:0044238,GO:0044260,GO:0044267,GO:0044422,GO:0044424,GO:0044430,GO:0044446,GO:0044464,GO:0051084,GO:0071704,GO:0071944
NVE16379	241	328	201	333	356	14	14	260	325	190	347	342	13	14	213.06	258	344	14	0.053	-4.245	-11.398	4.28669e-30	2.54094e-28	0	0.0345	0.0356	0.0356	TRUE	0.093	e_gw.4.126.1	81533	NEMVEDRAFT_v1g81533				ammonium transporter-like protein [Saccoglossus kowalevskii]	AMT1_CAEEL	Putative ammonium transporter 1;	AMT-1	Ammonium transporter
NVE7295	40	14	56	6	4	1	3	43	14	53	6	4	1	3	17.71	37	5	2	0.053	-4.231	-4.229	2.34908e-05	0.000129607	0	0.2609	0.2675	0.2675	TRUE	0.16
NVE4529	12	7	8	12	6	1	0	13	7	8	13	6	1	0	6.67	9	10	0	0.053	-4.232	-2.479	0.0131903	0.0367042	0	0.6702	0.4495	0.4495	TRUE	0.2689	fgenesh1_pg.scaffold_148000051	212052	NEMVEDRAFT_v1g212052				testis-specific serine/threonine-protein kinase 1 [Rattus norvegicus]	TSSK1_BOVIN	Testis-specific serine/threonine-protein kinase 1;
NVE5728	1986	2715	1283	2390	2146	95	127	2140	2687	1214	2492	2064	90	126	1544.88	2014	2278	108	0.054	-4.218	-14.549	5.95304e-48	1.07568e-45	0.0935	0.0168	0.0429	0.0429	TRUE	0.1547	estExt_fgenesh1_pg.C_1630052	245503	NEMVEDRAFT_v1g245503		sigP:1^26^0.684^YES			COCA1_HUMAN	Collagen alpha-1(XII) chain;
NVE17663	913	1294	875	946	1189	31	82	984	1281	828	987	1143	29	82	761.94	1031	1065	56	0.054	-4.22	-13.528	1.07105e-41	1.37919e-39	0.1275	0.0197	0.0452	0.0452	TRUE	0.1727	estExt_fgenesh1_pg.C_440101	241384	NEMVEDRAFT_v1g241384
NVE25263	306	344	301	600	450	13	22	330	340	285	626	433	12	22	292.54	318	530	17	0.054	-4.223	-12.604	1.99975e-36	1.85918e-34	0.0299	0.0289	0.0292	0.0292	TRUE	0.0649	fgenesh1_pg.scaffold_9000092	198303	NEMVEDRAFT_v1g198303				Otopetrin-2 [Crassostrea gigas]	OTOP2_MOUSE	Otopetrin-2;
NVE9661	847	1122	687	917	787	26	73	913	1110	650	956	757	25	73	640.54	891	856	49	0.054	-4.199	-12.45	1.39046e-35	1.23141e-33	0.1498	0.0208	0.0531	0.0531	TRUE	0.0946
NVE8428	380	477	305	480	432	14	29	410	472	289	501	415	13	29	304.06	390	458	21	0.054	-4.217	-12.37	3.80993e-35	3.25822e-33	0.0643	0.0284	0.0382	0.0382	TRUE	0.199	e_gw.200.52.1	123507	NEMVEDRAFT_v1g123507				homologue of Sarcophaga 26,29kDa proteinase [Periplaneta americana]	CYSP2_HOMAM	Digestive cysteine proteinase 2;		Papain family cysteine protease
NVE14683	137	243	301	211	227	11	14	148	240	285	220	218	10	14	162.24	224	219	12	0.054	-4.207	-10.234	1.39724e-24	5.60311e-23	0.0596	0.0409	0.0477	0.0477	TRUE	0.1916
NVE14441	9	8	10	18	15	0	1	10	8	9	19	14	0	1	8.75	9	16	0	0.054	-4.212	-2.575	0.0100247	0.0291177	0	0.5138	0.3129	0.3129	TRUE	0.0253	fgenesh1_pg.scaffold_3357000001	223808	NEMVEDRAFT_v1g223808					AOSL_PLEHO	Allene oxide synthase-lipoxygenase protein;
NVE5137	9	12	6	6	6	0	1	10	12	6	6	6	0	1	5.75	9	6	0	0.054	-4.219	-2.45	0.014297	0.0392813	0	0.7743	0.4808	0.4808	TRUE	0.1608	fgenesh1_pg.scaffold_156000040	212461	NEMVEDRAFT_v1g212461				putative MFS-type transporter [Zootermopsis nevadensis]	S18B1_MOUSE	MFS-type transporter SLC18B1;	SLC18B1	solute carrier family 18, subfamily B, member 1	GO:0005575,GO:0016020
NVE9850	1265	1468	1146	854	900	77	69	1363	1453	1085	891	866	73	69	828.36	1300	878	71	0.055	-4.196	-20.174	1.65446e-90	2.85152e-87	0.0127	0.0193	0.0164	0.0164	TRUE	0.1695	e_gw.229.49.1	126214	NEMVEDRAFT_v1g126214	*				SIX1B_DANRE	Homeobox protein six1b;
NVE6557	4762	5895	3495	7945	7147	221	319	5132	5834	3308	8285	6873	210	317	4279.91	4758	7579	264	0.055	-4.174	-16.983	1.09825e-64	5.2356e-62	0.0605	0.015	0.0325	0.0325	TRUE	0.424					sigP:1^25^0.831^YES
NVE10241	12050	12692	7831	13708	10767	375	856	12986	12560	7411	14295	10355	356	851	8402.19	10986	12325	604	0.055	-4.186	-8.595	8.35655e-18	2.00898e-16	0.1357	0.0145	0.055	0.1357	TRUE	0.6605	estExt_fgenesh1_pg.C_2370013	246737	NEMVEDRAFT_v1g246737		sigP:1^22^0.825^YES
NVE20010	127	297	146	109	163	1	20	137	294	138	114	157	1	20	122.89	190	136	10	0.055	-4.19	-3.945	7.99229e-05	0.000397945	0.5923	0.0496	0.1366	0.5923	TRUE	1.6712
NVE19430	660	1022	801	1250	1750	54	42	711	1011	758	1304	1683	51	42	794.33	827	1494	46	0.056	-4.15	-16.49	4.34608e-61	1.54569e-58	0.03	0.0195	0.0235	0.0235	TRUE	0.3021	e_gw.51.2.1	98917	NEMVEDRAFT_v1g98917		sigP:1^18^0.767^YES		zinc metalloproteinase, putative [Pediculus humanus corporis]	NAS13_CAEEL	Zinc metalloproteinase nas-13;	MEP1B	meprin A, beta	GO:0003674,GO:0003824,GO:0004175,GO:0004222,GO:0005488,GO:0005575,GO:0005576,GO:0005615,GO:0005623,GO:0005886,GO:0005887,GO:0006508,GO:0007275,GO:0007586,GO:0007610,GO:0007631,GO:0008150,GO:0008152,GO:0008233,GO:0008237,GO:0008270,GO:0016020,GO:0016021,GO:0016787,GO:0019538,GO:0031224,GO:0031226,GO:0032501,GO:0032502,GO:0042755,GO:0043050,GO:0043167,GO:0043169,GO:0043170,GO:0044238,GO:0044421,GO:…
NVE22148	1005	1132	831	1016	1014	35	79	1083	1120	786	1060	975	33	79	733.76	996	1018	56	0.056	-4.16	-14.683	8.30161e-49	1.57632e-46	0.0812	0.0199	0.0354	0.0354	TRUE	0.2721
NVE16430	534	562	385	536	533	20	37	576	556	364	559	513	19	37	374.77	499	536	28	0.056	-4.164	-13.353	1.14376e-40	1.39278e-38	0.0588	0.0256	0.0343	0.0343	TRUE	0.4346					sigP:1^24^0.871^YES
NVE12217	207	177	101	255	146	5	14	223	175	96	266	140	5	14	131.26	165	203	10	0.056	-4.147	-7.955	1.78663e-15	3.50536e-14	0.2012	0.0473	0.0914	0.0914	TRUE	0.1635
NVE17665	1618	2733	1141	2062	2632	71	140	1744	2705	1080	2150	2531	67	139	1488.06	1843	2340	103	0.056	-4.157	-7.836	4.66296e-15	8.76496e-14	0.1564	0.0169	0.0601	0.1564	TRUE	0.1348	estExt_fgenesh1_pg.C_440103	241386	NEMVEDRAFT_v1g241386		sigP:1^24^0.85^YES
NVE8427	695	858	653	776	804	17	67	749	849	618	809	773	16	67	554.48	739	791	42	0.056	-4.16	-7.073	1.51225e-12	2.17761e-11	0.1847	0.0219	0.0562	0.1847	TRUE	0.1013	fgenesh1_pg.scaffold_200000019	214437	NEMVEDRAFT_v1g214437					PB1_PIG	Seminal plasma protein pB1;
NVE17328	6525	5550	4916	7094	6688	124	523	7032	5492	4652	7398	6432	118	520	4520.65	5725	6915	319	0.056	-4.166	-6.69	2.23752e-11	2.89122e-10	0.2217	0.0149	0.0824	0.2217	TRUE	0.1848
NVE8584	39	94	80	56	95	0	8	42	93	76	58	91	0	8	52.64	70	74	4	0.056	-4.166	-5.9	3.64449e-09	3.62122e-08	0.4045	0.0971	0.133	0.133	TRUE	0.1839	fgenesh1_pg.scaffold_2038000001	222889	NEMVEDRAFT_v1g222889				Collagen alpha-6(VI) chain [Crassostrea gigas]			MATN1	matrilin 1, cartilage matrix protein	GO:0003674,GO:0005198,GO:0005201,GO:0005575,GO:0005576,GO:0005578,GO:0006461,GO:0008150,GO:0016043,GO:0022607,GO:0031012,GO:0043933,GO:0044085,GO:0044421,GO:0065003,GO:0070271,GO:0071822,GO:0071840
NVE23861	61	60	35	77	60	1	5	66	59	33	80	58	1	5	43.17	53	69	3	0.056	-4.169	-5.634	1.75867e-08	1.59147e-07	0.0928	0.1153	0.1088	0.1088	TRUE	0.6035					sigP:1^22^0.672^YES
NVE20930	552	637	422	584	564	17	46	595	630	399	609	542	16	46	405.43	541	576	31	0.057	-4.135	-12.425	1.9209e-35	1.68124e-33	0.1109	0.0248	0.0442	0.0442	TRUE	0.4141	e_gw.6.461.1	82577	NEMVEDRAFT_v1g82577				h-orf protein [Utterbackia imbecillis]	TCNA_TRYCR	Sialidase;
NVE5369	840	915	535	1104	742	31	59	905	906	506	1151	714	29	59	610.02	772	932	44	0.057	-4.135	-12.246	1.75888e-34	1.43307e-32	0.1222	0.0211	0.0519	0.0519	TRUE	0.721	estExt_fgenesh1_pg.C_15980001	248720	NEMVEDRAFT_v1g248720		sigP:1^22^0.865^YES		Chain D, Crystal Structure Of Gamma Glutamyl Hydrolase (h218n) From Zebrafish Complex With Mtx Polyglutamate	DDX41_MOUSE	Probable ATP-dependent RNA helicase DDX41;	GGH	Gamma-glutamyl hydrolase (Conjugase, folylpolygammaglutamyl hydrolase)	GO:0000323,GO:0003674,GO:0003824,GO:0005575,GO:0005576,GO:0005615,GO:0005622,GO:0005623,GO:0005737,GO:0005764,GO:0005773,GO:0005829,GO:0006082,GO:0006520,GO:0006575,GO:0006725,GO:0006732,GO:0006760,GO:0006807,GO:0008150,GO:0008152,GO:0008233,GO:0008238,GO:0008242,GO:0009719,GO:0009725,GO:0009987,GO:0010033,GO:0010035,GO:0010038,GO:0010043,GO:0010243,GO:0016023,GO:0016787,GO:0019752,GO:0031410,GO:…
NVE16128	636	753	467	852	728	20	53	685	745	442	888	700	19	53	504.7	624	794	36	0.057	-4.127	-12.195	3.29005e-34	2.61408e-32	0.1348	0.0226	0.049	0.049	TRUE	0.5146							leishmanolysin-like (metallopeptidase M8 family), isoform CRA_c [Mus musculus]	LMLN_DROPS	Leishmanolysin-like peptidase;	LMLN	leishmanolysin-like (metallopeptidase M8 family)	GO:0000003,GO:0000070,GO:0000226,GO:0000278,GO:0000280,GO:0000819,GO:0003006,GO:0003674,GO:0003824,GO:0004175,GO:0004222,GO:0005575,GO:0005622,GO:0005623,GO:0005737,GO:0005811,GO:0005912,GO:0005924,GO:0005925,GO:0006139,GO:0006259,GO:0006323,GO:0006325,GO:0006338,GO:0006461,GO:0006725,GO:0006807,GO:0006928,GO:0006996,GO:0007010,GO:0007017,GO:0007049,GO:0007051,GO:0007052,GO:0007059,GO:0007067,GO:…
NVE24626	84	130	94	61	51	6	6	91	129	89	64	49	6	6	61.78	103	56	6	0.057	-4.139	-7.686	1.51558e-14	2.71665e-13	0	0.0848	0.0633	0.0633	TRUE	0.3219	e_gw.84.157.1	106963	NEMVEDRAFT_v1g106963		sigP:1^22^0.663^YES			GAPR1_HUMAN	Golgi-associated plant pathogenesis-related protein 1;		GLI pathogenesis-related 2	GO:0005575,GO:0005576
NVE25957	4264	4848	2943	6179	4393	127	346	4595	4798	2785	6444	4225	121	344	3330.21	4059	5334	232	0.057	-4.127	-7.499	6.41958e-14	1.07421e-12	0.172	0.0153	0.0646	0.172	TRUE	0.6124	estExt_fgenesh1_pg.C_960040	243708	NEMVEDRAFT_v1g243708		sigP:1^16^0.734^YES		hydrolase [Streptomyces chartreusis]
NVE8088	544	840	473	755	771	17	55	586	831	448	787	741	16	55	494.98	622	764	36	0.057	-4.136	-7.05	1.78901e-12	2.55479e-11	0.1813	0.0228	0.0588	0.1813	TRUE	0.178
NVE12822	1773	2191	833	2569	1795	67	121	1911	2168	788	2679	1726	64	120	1350.96	1622	2202	92	0.057	-4.141	-7.017	2.26323e-12	3.19937e-11	0.1942	0.0172	0.0709	0.1942	TRUE	0.8938					sigP:1^20^0.83^YES			GAPR1_HUMAN	Golgi-associated plant pathogenesis-related protein 1;		GLI pathogenesis-related 2	GO:0005575,GO:0005576
NVE3963	93	104	87	132	83	0	11	100	103	82	138	80	0	11	73.41	95	109	6	0.057	-4.142	-6.884	5.8386e-12	7.94291e-11	0.4969	0.0736	0.0963	0.0963	TRUE	0.0916
NVE3842	12314	8849	6057	13668	9400	184	883	13271	8757	5732	14254	9040	175	878	7443.83	9253	11647	526	0.057	-4.136	-5.448	5.09263e-08	4.34026e-07	0.3311	0.0146	0.112	0.3311	TRUE	0.1399	estExt_fgenesh1_pg.C_140070	239381	NEMVEDRAFT_v1g239381		sigP:1^23^0.853^YES
NVE22822	45	79	28	72	44	1	5	48	78	26	75	42	1	5	39.5	51	58	3	0.057	-4.122	-5.174	2.29436e-07	1.77228e-06	0.2395	0.1247	0.1591	0.1591	TRUE	0.1133	fgenesh1_pg.scaffold_7171000002	225036	NEMVEDRAFT_v1g225036
NVE21827	27	34	42	46	31	1	3	29	34	40	48	30	1	3	26.32	34	39	2	0.057	-4.134	-4.741	2.12856e-06	1.41437e-05	0	0.1802	0.1273	0.1273	TRUE	0.099	fgenesh1_pg.scaffold_657000005	221080	NEMVEDRAFT_v1g221080		sigP:1^21^0.622^YES		collagen alpha-3(VI) chain isoform 5 precursor [Homo sapiens]	VITRN_MOUSE	Vitrin;		Inherit from KOG: collagen, type
NVE19156	1053	1488	1101	1169	1249	43	102	1135	1473	1042	1219	1201	41	101	887.41	1217	1210	71	0.058	-4.099	-14.396	5.50905e-47	9.56867e-45	0.0999	0.0189	0.0382	0.0382	TRUE	0.2717	e_gw.50.1.1,e_gw.50.2.1	98678	NEMVEDRAFT_v1g98677,NEMVEDRAFT_v1g98737		sigP:1^25^0.75^YES		C. briggsae CBR-NAS-13 protein [Caenorhabditis briggsae]	NAS13_CAEEL	Zinc metalloproteinase nas-13;	ASTL	astacin-like metalloendopeptidase (M12 family)	GO:0000003,GO:0001775,GO:0003674,GO:0003824,GO:0004175,GO:0004222,GO:0005575,GO:0005622,GO:0005623,GO:0005737,GO:0005886,GO:0006508,GO:0006810,GO:0006897,GO:0006909,GO:0007155,GO:0007275,GO:0007338,GO:0007343,GO:0008150,GO:0008152,GO:0008233,GO:0008237,GO:0009566,GO:0009893,GO:0009987,GO:0010468,GO:0010604,GO:0010954,GO:0016020,GO:0016021,GO:0016023,GO:0016192,GO:0016787,GO:0017090,GO:0019222,GO:…
NVE13069	201	250	228	275	338	13	14	217	247	216	287	325	12	14	188.27	227	306	13	0.058	-4.11	-11.792	4.27572e-32	3.00319e-30	0	0.0372	0.0238	0.0238	TRUE	0.0476							Blastula protease 10 [Crassostrea gigas]
NVE16311	228	240	157	244	155	7	18	246	238	149	254	149	7	18	151.41	211	202	12	0.058	-4.108	-9.24	2.47539e-20	7.33644e-19	0.125	0.0429	0.0643	0.0643	TRUE	0.4898	e_gw.4.75.1	81701	NEMVEDRAFT_v1g81701				vesicular glutamate transporter 1-like protein [Cricetulus griseus]	VGLU1_RAT	Vesicular glutamate transporter 1;		Major Facilitator Superfamily
NVE17509	16	22	12	33	33	2	0	17	22	11	34	32	2	0	16.92	17	33	1	0.058	-4.114	-3.455	0.000549407	0.00226787	0	0.2726	0.1912	0.1912	TRUE	0.1866	fgenesh1_pg.scaffold_4356000001	224298	NEMVEDRAFT_v1g224298				Peptidase M12A, astacin domain and Peptidase, metallopeptidase domain and Metallopeptidase, catalytic domain-containing protein 30 [Strongyloides ratti]	NAS15_CAEEL	Zinc metalloproteinase nas-15;	ASTL	astacin-like metalloendopeptidase (M12 family)	GO:0000003,GO:0001775,GO:0003674,GO:0003824,GO:0004175,GO:0004222,GO:0005575,GO:0005622,GO:0005623,GO:0005737,GO:0005886,GO:0006508,GO:0006810,GO:0006897,GO:0006909,GO:0007155,GO:0007275,GO:0007338,GO:0007343,GO:0008150,GO:0008152,GO:0008233,GO:0008237,GO:0009566,GO:0009893,GO:0009987,GO:0010468,GO:0010604,GO:0010954,GO:0016020,GO:0016021,GO:0016023,GO:0016192,GO:0016787,GO:0017090,GO:0019222,GO:…
NVE5136	8	13	4	9	12	1	0	9	13	4	9	12	1	0	6.74	9	10	0	0.058	-4.116	-2.397	0.016519	0.0444863	0	0.6635	0.4641	0.4641	TRUE	0.1	fgenesh1_pg.scaffold_156000037	212458	NEMVEDRAFT_v1g212458		sigP:1^18^0.687^YES		putative synaptic vesicular amine transporter [Danaus plexippus]	S18B1_MOUSE	MFS-type transporter SLC18B1;	SLC18B1	solute carrier family 18, subfamily B, member 1	GO:0005575,GO:0016020
NVE11392	122	155	114	196	163	7	9	131	153	108	204	157	7	9	109.93	131	180	8	0.059	-4.072	-8.894	5.88115e-19	1.55027e-17	0	0.0538	0.0428	0.0428	TRUE	0.0991					sigP:1^16^0.809^YES
NVE18952	1922	2457	1882	2254	2265	56	195	2071	2432	1781	2351	2178	53	194	1579.99	2095	2264	124	0.059	-4.084	-7.409	1.2766e-13	2.05789e-12	0.1703	0.0167	0.0623	0.1703	TRUE	0.0941					sigP:1^20^0.7^YES
NVE12703	277	274	202	284	249	8	23	299	271	191	296	239	8	23	189.57	254	268	16	0.06	-4.066	-10.483	1.03925e-25	4.52143e-24	0.0826	0.0371	0.0466	0.0466	TRUE	0.3483	e_gw.295.42.1	131488	NEMVEDRAFT_v1g131488				solute carrier family 46 (folate transporter), member 1 [Xenopus (Silurana) tropicalis]	PCFT_DANRE	Proton-coupled folate transporter;	SLC46A1	solute carrier family 46 (folate transporter), member 1	GO:0005575,GO:0016020
NVE25819	220	239	175	274	217	8	18	237	237	166	286	209	8	18	165.59	213	248	13	0.06	-4.07	-10.217	1.66109e-24	6.62249e-23	0.052	0.0404	0.0436	0.0436	TRUE	0.281	estExt_fgenesh1_pg.C_940058	243672	NEMVEDRAFT_v1g243672
NVE10583	142	204	187	280	454	13	9	153	202	177	292	437	12	9	183.11	177	364	10	0.06	-4.054	-10.074	7.185e-24	2.76136e-22	0	0.0379	0.0365	0.0365	TRUE	0.105	e_gw.243.5.1	127845	NEMVEDRAFT_v1g127845		sigP:1^15^0.89^YES		C. briggsae CBR-NAS-13 protein [Caenorhabditis briggsae]	BP10_PARLI	Blastula protease 10;		Astacin (Peptidase family M12A)
NVE4966	11015	15395	8344	12726	13309	381	1050	11871	15235	7896	13271	12799	362	1044	8925.65	11667	13035	703	0.06	-4.053	-7.52	5.47895e-14	9.23017e-13	0.1666	0.0145	0.0639	0.1666	TRUE	0.0901	estExt_fgenesh1_pg.C_1530045	245286	NEMVEDRAFT_v1g245286		sigP:1^19^0.856^YES
NVE3876	65	23	56	73	46	2	4	70	23	53	76	44	2	4	38.86	49	60	3	0.06	-4.054	-5.134	2.83624e-07	2.15932e-06	0.1992	0.1265	0.1516	0.1516	TRUE	0.1826					sigP:1^21^0.785^YES			LRP12_MOUSE	Low-density lipoprotein receptor-related protein 12;	SORL1	Sortilin-related VPS10 domain containing receptor	GO:0003674,GO:0004871,GO:0004872,GO:0004888,GO:0005488,GO:0005575,GO:0005622,GO:0005623,GO:0005737,GO:0005768,GO:0005770,GO:0005771,GO:0005886,GO:0005887,GO:0006810,GO:0006897,GO:0006898,GO:0006928,GO:0007154,GO:0007165,GO:0008150,GO:0008283,GO:0009987,GO:0016020,GO:0016021,GO:0016192,GO:0016477,GO:0023052,GO:0030169,GO:0031224,GO:0031226,GO:0038023,GO:0040011,GO:0043025,GO:0043226,GO:0043227,GO:…
NVE6785	32	29	36	68	92	2	2	34	29	34	71	88	2	2	37.22	32	80	2	0.06	-4.059	-4.895	9.82077e-07	6.89053e-06	0	0.1315	0.0841	0.0841	TRUE	0.0468
NVE17009	29	21	22	27	18	2	1	31	21	21	28	17	2	1	17.32	24	22	2	0.06	-4.058	-3.983	6.79853e-05	0.000343003	0	0.2666	0.1811	0.1811	TRUE	0.2413
NVE13250	12	4	8	10	18	0	1	13	4	8	10	17	0	1	7.6	8	14	0	0.06	-4.06	-2.389	0.0169077	0.0453802	0	0.5896	0.4307	0.4307	TRUE	0.1838					sigP:1^20^0.851^YES		Zinc carboxypeptidase A 1 [Harpegnathos saltator]	CBPA5_MOUSE	Carboxypeptidase A5;		Carboxypeptidase	GO:0003674,GO:0003824,GO:0004180,GO:0004181,GO:0005575,GO:0005576,GO:0005615,GO:0007275,GO:0007399,GO:0008150,GO:0008152,GO:0008233,GO:0008235,GO:0008237,GO:0008238,GO:0009987,GO:0016787,GO:0022008,GO:0030154,GO:0032501,GO:0032502,GO:0044421,GO:0044699,GO:0044707,GO:0044763,GO:0048731,GO:0048856,GO:0048869,GO:0070011
NVE25752	629	741	521	715	904	35	45	678	733	493	746	869	33	45	513.9	635	808	39	0.061	-4.027	-15.172	5.451e-52	1.15222e-49	0.0293	0.0225	0.025	0.025	TRUE	0.3017	e_gw.94.5.1	109423	NEMVEDRAFT_v1g109423		sigP:1^17^0.879^YES		zinc metalloproteinase, putative [Pediculus humanus corporis]	NAS13_CAEEL	Zinc metalloproteinase nas-13;		Astacin (Peptidase family M12A)
NVE252	1268	1610	1144	1417	1426	49	118	1367	1593	1083	1478	1371	47	117	1007.93	1348	1424	82	0.061	-4.042	-13.961	2.69296e-44	3.84322e-42	0.105	0.0183	0.0409	0.0409	TRUE	0.094	estExt_fgenesh1_pg.C_10304	237832	NEMVEDRAFT_v1g237832		sigP:1^22^0.777^YES			SAL_SILAS	Rhamnose-binding lectin;		Galactose binding lectin domain
NVE20743	215	303	246	325	341	8	24	232	300	233	339	328	8	24	208.96	255	334	16	0.061	-4.028	-11.242	2.53495e-29	1.43068e-27	0.0367	0.0349	0.0351	0.0351	TRUE	0.1784	gw.59.56.1,fgenesh1_pg.scaffold_59000004	25059.2	NEMVEDRAFT_v1g25059,NEMVEDRAFT_v1g205377				Xaa-Pro aminopeptidase 1 [Ophiophagus hannah]	AMPP1_ARTOC	Probable Xaa-Pro aminopeptidase P;	XPNPEP1	X-prolyl aminopeptidase (Aminopeptidase P)	GO:0003674,GO:0003824,GO:0004177,GO:0005488,GO:0005515,GO:0005575,GO:0005622,GO:0005623,GO:0005737,GO:0005829,GO:0006508,GO:0006518,GO:0006807,GO:0008150,GO:0008152,GO:0008233,GO:0008235,GO:0008237,GO:0008238,GO:0009056,GO:0009987,GO:0010815,GO:0016787,GO:0019538,GO:0030145,GO:0034641,GO:0043167,GO:0043169,GO:0043170,GO:0043171,GO:0043603,GO:0044237,GO:0044238,GO:0044248,GO:0044424,GO:0044444,GO:…
NVE20426	80	93	42	83	67	1	8	86	92	40	87	64	1	8	53.99	73	76	4	0.061	-4.044	-6.033	1.61e-09	1.66469e-08	0.2136	0.095	0.121	0.121	TRUE	0.976	e_gw.57.49.1	100394	NEMVEDRAFT_v1g100394				phospholipase B-like protein [Polysphondylium pallidum PN500]	PLBL1_HUMAN	Phospholipase B-like 1;	PLBD1	phospholipase B domain containing	GO:0005575,GO:0005576,GO:0005622,GO:0005623,GO:0005737,GO:0005829,GO:0006066,GO:0006576,GO:0006629,GO:0006644,GO:0006650,GO:0006793,GO:0006796,GO:0006807,GO:0008150,GO:0008152,GO:0008610,GO:0008654,GO:0009058,GO:0009308,GO:0009987,GO:0019637,GO:0034641,GO:0036149,GO:0036151,GO:0036152,GO:0042439,GO:0044106,GO:0044237,GO:0044238,GO:0044249,GO:0044255,GO:0044281,GO:0044424,GO:0044444,GO:0044464,GO:…
NVE18960	4790	5734	4309	4454	4865	232	400	5162	5675	4078	4645	4679	220	398	3550.91	4972	4662	309	0.062	-4.008	-17.566	4.45105e-69	3.2171e-66	0.0527	0.0152	0.0281	0.0281	TRUE	0.1908
NVE25857	2650	3751	3088	3063	3118	127	271	2856	3712	2922	3194	2999	121	269	2296.2	3163	3096	195	0.062	-4.021	-15.449	7.71495e-54	1.80064e-51	0.0816	0.0159	0.0359	0.0359	TRUE	0.1865	estExt_fgenesh1_pg.C_950002	243681	NEMVEDRAFT_v1g243681	*			transcription factor Pax-A [Acropora millepora]	PAX2A_DANRE	Paired box protein Pax-2a;		Paired box	GO:0000003,GO:0000975,GO:0000976,GO:0000977,GO:0001012,GO:0001067,GO:0001071,GO:0001708,GO:0002119,GO:0002164,GO:0003006,GO:0003674,GO:0003676,GO:0003677,GO:0003700,GO:0005488,GO:0005575,GO:0005622,GO:0005623,GO:0005634,GO:0006355,GO:0006357,GO:0007275,GO:0008150,GO:0008152,GO:0009056,GO:0009057,GO:0009653,GO:0009790,GO:0009791,GO:0009792,GO:0009889,GO:0009891,GO:0009893,GO:0009987,GO:0010468,GO:…
NVE20329	1892	2510	2162	1941	2421	86	191	2039	2484	2046	2024	2328	82	190	1599.02	2190	2176	136	0.062	-4.013	-15.193	3.95884e-52	8.44778e-50	0.0843	0.0167	0.0357	0.0357	TRUE	0.1117	gw.56.4.1	4663	NEMVEDRAFT_v1g4663
NVE18955	346	352	354	504	465	14	31	373	348	335	526	447	13	31	296.17	352	486	22	0.062	-4.004	-13.285	2.82159e-40	3.3274e-38	0.0075	0.0287	0.0246	0.0246	TRUE	0.0201	e_gw.5.7.1	81941	NEMVEDRAFT_v1g81941							COL4A2	collagen, type IV, alpha	GO:0000003,GO:0000902,GO:0000904,GO:0001101,GO:0001655,GO:0001700,GO:0001822,GO:0002009,GO:0002119,GO:0002164,GO:0003006,GO:0003674,GO:0005198,GO:0005201,GO:0005575,GO:0005576,GO:0005578,GO:0005581,GO:0005587,GO:0005604,GO:0005605,GO:0005622,GO:0005623,GO:0005737,GO:0005783,GO:0005788,GO:0006139,GO:0006351,GO:0006725,GO:0006807,GO:0006928,GO:0006935,GO:0007275,GO:0007391,GO:0007399,GO:0007409,GO:…
NVE17674	305	375	228	392	339	13	26	329	371	216	409	326	12	26	241.23	305	368	19	0.062	-4.003	-11.044	2.33113e-28	1.22036e-26	0.0734	0.0321	0.0438	0.0438	TRUE	0.3482	fgenesh1_pg.scaffold_44000114	203669	NEMVEDRAFT_v1g203669		sigP:1^18^0.85^YES
NVE5882	378	662	300	725	514	30	27	407	655	284	756	494	29	27	378.88	449	625	28	0.062	-4.019	-10.949	6.68347e-28	3.37274e-26	0.1117	0.0255	0.0557	0.0557	TRUE	0.2448	fgenesh1_pg.scaffold_166000018	212947	NEMVEDRAFT_v1g212947		sigP:1^22^0.582^YES		ADAM metallopeptidase with thrombospondin type 1 motif, 16, isoform CRA_c [Homo sapiens]	ATS16_HUMAN	A disintegrin and metalloproteinase with thrombospondin motifs 16;
NVE19567	126	177	116	161	122	7	11	136	175	110	168	117	7	11	103.36	140	142	9	0.062	-4	-8.658	4.80913e-18	1.18151e-16	0.0488	0.0563	0.0537	0.0537	TRUE	0.1232	gw.52.46.1	22127	NEMVEDRAFT_v1g22127				Solute carrier family 9 (sodium/hydrogen exchanger), member 6 [Homo sapiens]	SL9A7_MOUSE	Sodium/hydrogen exchanger 7;	SLC9A7	solute carrier family 9, subfamily A	GO:0000139,GO:0003674,GO:0005215,GO:0005451,GO:0005488,GO:0005515,GO:0005575,GO:0005622,GO:0005623,GO:0005737,GO:0005739,GO:0005768,GO:0005769,GO:0005770,GO:0005783,GO:0005789,GO:0005794,GO:0005802,GO:0005886,GO:0006810,GO:0006811,GO:0006812,GO:0006813,GO:0006814,GO:0006818,GO:0006885,GO:0008150,GO:0008324,GO:0009987,GO:0010008,GO:0012505,GO:0015075,GO:0015077,GO:0015078,GO:0015079,GO:0015081,GO:…
NVE11657	179	193	123	174	176	3	18	193	191	116	181	169	3	18	124.54	167	175	10	0.062	-4.019	-8.508	1.76689e-17	4.12385e-16	0.1962	0.0491	0.0695	0.0695	TRUE	0.5022
NVE4416	240	253	142	294	180	5	22	259	250	134	307	173	5	22	164.25	214	240	14	0.062	-4.018	-8.309	9.61505e-17	2.14577e-15	0.2549	0.0406	0.0889	0.0889	TRUE	0.7879
NVE23680	13	15	19	20	27	2	0	14	15	18	21	26	2	0	13.65	16	24	1	0.062	-4.013	-3.323	0.000891062	0.00350573	0	0.3344	0.2129	0.2129	TRUE	0.0577	e_gw.78.8.1	105616	NEMVEDRAFT_v1g105616		sigP:1^14^0.741^YES		metalloproteinase 2 [Hydra vulgaris]	BP10_PARLI	Blastula protease 10;		Astacin (Peptidase family M12A)
NVE26058	1075	1498	1268	1337	1588	62	104	1159	1482	1200	1394	1527	59	103	989.26	1280	1460	81	0.063	-3.983	-17.422	5.64411e-68	3.6132e-65	0.033	0.0184	0.0226	0.0226	TRUE	0.1528	estExt_fgenesh1_pg.C_980002	243754	NEMVEDRAFT_v1g243754		sigP:1^17^0.882^YES
NVE22463	8139	11603	7477	9518	10007	396	781	8772	11483	7076	9926	9624	376	777	6861.8	9110	9775	576	0.063	-3.983	-14.974	1.08711e-50	2.23466e-48	0.0892	0.0146	0.0397	0.0397	TRUE	0.1362	estExt_fgenesh1_pg.C_70114	238655	NEMVEDRAFT_v1g238655		sigP:1^19^0.855^YES
NVE24845	680	969	604	882	719	28	69	733	959	572	920	691	27	69	567.12	755	806	48	0.063	-3.99	-12.215	2.58247e-34	2.07394e-32	0.1285	0.0217	0.0487	0.0487	TRUE	0.1118
NVE7125	196	309	186	190	156	11	19	211	306	176	198	150	10	19	152.94	231	174	14	0.063	-3.982	-9.982	1.83175e-23	6.87472e-22	0.0651	0.0426	0.0501	0.0501	TRUE	0.2482	fgenesh1_pg.scaffold_183000029	213743	NEMVEDRAFT_v1g213743								WSC domain
NVE20194	2026	2864	2112	2617	2562	75	225	2183	2834	1999	2729	2464	71	224	1786.36	2339	2596	148	0.063	-3.988	-7.748	9.36588e-15	1.71588e-13	0.1486	0.0164	0.056	0.1486	TRUE	0.2776	estExt_GenewiseH_1.C_550230	184260	NEMVEDRAFT_v1g184260				RecName: Full=Calumenin-A; Flags: Precursor [Salmo salar]	CALUA_SALSA	Calumenin-A;		EFh
NVE12180	69	61	54	105	149	4	4	74	60	51	109	143	4	4	63.77	62	126	4	0.063	-3.991	-6.504	7.83239e-11	9.55322e-10	0	0.0826	0.0607	0.0607	TRUE	0.1733
NVE21481	28	83	28	55	43	1	5	30	82	26	57	41	1	5	34.78	46	49	3	0.063	-3.981	-4.823	1.41373e-06	9.68388e-06	0.2869	0.1398	0.1852	0.1852	TRUE	2.4504					sigP:1^21^0.826^YES
NVE15582	25	66	25	35	15	2	3	27	65	24	36	14	2	3	24.53	39	25	2	0.063	-3.989	-4.419	9.92666e-06	5.86852e-05	0.2653	0.1923	0.2199	0.2199	TRUE	1.819	fgenesh1_pg.scaffold_3719000001	224010	NEMVEDRAFT_v1g224010
NVE12179	1050	1350	909	2087	2424	84	62	1132	1336	860	2176	2331	80	62	1139.56	1109	2254	71	0.064	-3.969	-17.121	1.03584e-65	5.27477e-63	0.03	0.0178	0.0224	0.0224	TRUE	0.1927					sigP:1^19^0.74^YES		Ganglioside GM2 activator [Crassostrea gigas]
NVE4225	3053	3551	2492	3358	3120	131	268	3290	3514	2358	3502	3001	124	267	2293.73	3054	3252	196	0.064	-3.967	-14.761	2.59458e-49	5.01157e-47	0.0862	0.0159	0.0385	0.0385	TRUE	0.3222	fgenesh1_pg.scaffold_144000020	211803	NEMVEDRAFT_v1g211803
NVE22047	3024	3753	2579	3365	3223	127	285	3259	3714	2441	3509	3100	121	283	2346.66	3138	3304	202	0.064	-3.958	-14.019	1.19827e-44	1.7434e-42	0.1013	0.0158	0.0429	0.0429	TRUE	0.1613	e_gw.67.129.1	102981	NEMVEDRAFT_v1g102981				endothelin-converting enzyme 1 [Danio rerio]	ECE2_HUMAN	Endothelin-converting enzyme 2;		endothelin converting enzyme
NVE22019	1637	1911	1110	1891	1713	61	144	1764	1891	1050	1972	1647	58	143	1218.06	1568	1810	100	0.064	-3.965	-12.477	9.95308e-36	8.92035e-34	0.1298	0.0176	0.0522	0.0522	TRUE	0.6725	e_gw.67.54.1	103135	NEMVEDRAFT_v1g103135				RecName: Full=Carboxypeptidase D; AltName: Full=CPD-2; AltName: Full=Metallocarboxypeptidase D, partial [Lophonetta specularioides]	CBPD_LOPSP	Carboxypeptidase D;	CPD	Carboxypeptidase	GO:0002165,GO:0003008,GO:0003674,GO:0003824,GO:0004180,GO:0004181,GO:0005488,GO:0005575,GO:0005576,GO:0005622,GO:0005623,GO:0005634,GO:0005737,GO:0005802,GO:0005886,GO:0006508,GO:0006810,GO:0006897,GO:0006909,GO:0007275,GO:0007444,GO:0007472,GO:0007476,GO:0007552,GO:0007560,GO:0007610,GO:0007611,GO:0007613,GO:0007616,GO:0008150,GO:0008152,GO:0008233,GO:0008235,GO:0008237,GO:0008238,GO:0008270,GO:…
NVE12877	82	118	49	97	44	5	6	88	117	46	101	42	5	6	57.96	84	72	6	0.064	-3.969	-6.121	9.32636e-10	9.98884e-09	0.1971	0.0895	0.1286	0.1286	TRUE	0.104
NVE17022	52	43	40	43	35	1	5	56	43	38	45	34	1	5	31.55	46	40	3	0.064	-3.956	-5.303	1.13945e-07	9.23012e-07	0.0215	0.1526	0.1127	0.1127	TRUE	0.2097							uromodulin isoform a preproprotein [Homo sapiens]	UROM_HUMAN	Uromodulin;
NVE10950	1672	2449	1865	1993	2467	112	154	1802	2424	1765	2078	2373	106	153	1528.71	1997	2226	130	0.065	-3.945	-18.454	4.80563e-76	4.68152e-73	0.0311	0.0168	0.0216	0.0216	TRUE	0.2821	e_gw.251.9.1,estExt_gwp.C_2510018,e_gw.251.44.1	128497,173414,128484	NEMVEDRAFT_v1g128497,NEMVEDRAFT_v1g173414,NEMVEDRAFT_v1g128484		sigP:1^19^0.877^YES			FBP1_STRPU	Fibropellin-1;		Notch ligand involved in the mediation of Notch signaling (By similarity)	GO:0005575,GO:0016020
NVE14991	1033	1095	924	1181	1317	48	89	1113	1084	874	1232	1267	46	89	814.81	1024	1250	68	0.065	-3.936	-16.298	1.0237e-59	3.27671e-57	0.0397	0.0193	0.0245	0.0245	TRUE	0.1303
NVE11982	502	588	353	565	575	24	41	541	582	334	589	553	23	41	380.39	486	571	32	0.065	-3.937	-12.494	8.09724e-36	7.34521e-34	0.0654	0.0255	0.038	0.038	TRUE	0.5831							Matrix metalloproteinase-9 [Tupaia chinensis]	MMP9_CANFA			epididymal sperm binding protein 1
NVE4475	485	824	544	648	779	21	61	523	815	515	676	749	20	61	479.79	618	712	40	0.065	-3.943	-11.538	8.45292e-31	5.23194e-29	0.1425	0.0231	0.0522	0.0522	TRUE	0.6165	e_gw.148.78.1	117600	NEMVEDRAFT_v1g117600		sigP:1^19^0.647^YES		Si:dkey-2n12.1 protein [Danio rerio]	GAPR1_HUMAN	Golgi-associated plant pathogenesis-related protein 1;
NVE7656	292	368	281	374	263	9	33	315	364	266	390	253	9	33	232.73	315	322	21	0.065	-3.937	-10.138	3.73386e-24	1.4626e-22	0.1581	0.0328	0.0573	0.0573	TRUE	0.0694					sigP:1^28^0.556^YES		SGNH hydrolase [Auricularia delicata TFB-10046 SS5]
NVE5856	12	14	19	34	25	1	1	13	14	18	35	24	1	1	15.17	15	30	1	0.065	-3.943	-3.306	0.000946907	0.00369559	0	0.3023	0.1934	0.1934	TRUE	0.1026					sigP:1^16^0.887^YES
NVE22147	321	413	331	397	373	16	32	346	409	313	414	359	15	32	269.67	356	386	24	0.066	-3.927	-12.772	2.36007e-37	2.33981e-35	0.023	0.0302	0.0285	0.0285	TRUE	0.1288					sigP:1^20^0.83^YES
NVE11707	1370	1368	855	1584	1156	42	122	1476	1354	809	1652	1112	40	121	937.75	1213	1382	80	0.066	-3.913	-6.818	9.2331e-12	1.23141e-10	0.1823	0.0186	0.0668	0.1823	TRUE	0.6801	estExt_fgenesh1_pg.C_270013	240295	NEMVEDRAFT_v1g240295		sigP:1^18^0.879^YES						WAP
NVE13546	1159	1447	1015	1388	1303	66	100	1249	1432	961	1447	1253	63	99	929.19	1214	1350	81	0.067	-3.906	-16.244	2.4636e-59	7.66657e-57	0.0403	0.0187	0.0258	0.0258	TRUE	0.1386	estExt_fgenesh1_pg.C_310054	240562	NEMVEDRAFT_v1g240562		sigP:1^30^0.835^YES		endothelin converting enzyme 2 [Danio rerio]	ECE1_MOUSE	Endothelin-converting enzyme 1;		endothelin converting enzyme
NVE15649	570	849	697	742	794	28	69	614	840	660	774	764	27	69	535.24	705	769	48	0.067	-3.893	-13.282	2.93544e-40	3.4256e-38	0.0857	0.0221	0.0367	0.0367	TRUE	0.2232	e_gw.375.15.1	136469	NEMVEDRAFT_v1g136469					GAPR1_HUMAN	Golgi-associated plant pathogenesis-related protein 1;		GLI pathogenesis-related 2
NVE13023	124	170	94	163	193	6	12	134	168	89	170	186	6	12	109.15	130	178	9	0.067	-3.892	-8.306	9.92431e-17	2.21258e-15	0.0634	0.0541	0.057	0.057	TRUE	0.1252	e_gw.3.119.1	80340	NEMVEDRAFT_v1g80340				acid-sensing ion channel 2 isoform MDEG1 [Homo sapiens]	ASIC2_HUMAN	Acid-sensing ion channel 2;	ASIC4	acid-sensing (proton-gated) ion channel	GO:0001101,GO:0001976,GO:0003008,GO:0003013,GO:0003025,GO:0003026,GO:0003073,GO:0003674,GO:0005215,GO:0005216,GO:0005244,GO:0005248,GO:0005261,GO:0005272,GO:0005488,GO:0005515,GO:0005575,GO:0005622,GO:0005623,GO:0005737,GO:0005886,GO:0005887,GO:0006810,GO:0006811,GO:0006812,GO:0006814,GO:0006816,GO:0006820,GO:0006873,GO:0006875,GO:0006879,GO:0006897,GO:0006909,GO:0006911,GO:0006950,GO:0007154,GO:…
NVE19039	7527	8445	6666	8339	8509	267	765	8112	8357	6308	8696	8183	254	761	5810.24	7592	8440	508	0.067	-3.904	-8.029	9.7949e-16	1.96126e-14	0.1351	0.0147	0.0553	0.1351	TRUE	0.1782					sigP:1^17^0.9^YES
NVE19500	115	106	82	114	113	5	9	124	105	78	119	109	5	9	78.24	102	114	7	0.067	-3.903	-7.785	6.96506e-15	1.28762e-13	0	0.0699	0.0554	0.0554	TRUE	0.1241	estExt_fgenesh1_pg.C_5190005	248347	NEMVEDRAFT_v1g248347				Zinc transporter 2 [Columba livia]	ZNT2_HUMAN	Zinc transporter 2;	SLC30A3	solute carrier family 30 (zinc transporter), member	GO:0000041,GO:0000323,GO:0002376,GO:0002790,GO:0002791,GO:0002793,GO:0003001,GO:0003674,GO:0005215,GO:0005385,GO:0005488,GO:0005515,GO:0005575,GO:0005622,GO:0005623,GO:0005737,GO:0005764,GO:0005765,GO:0005768,GO:0005770,GO:0005773,GO:0005774,GO:0005886,GO:0005887,GO:0006810,GO:0006811,GO:0006812,GO:0006829,GO:0006873,GO:0006875,GO:0006882,GO:0006950,GO:0006952,GO:0006955,GO:0007154,GO:0007267,GO:…
NVE999	117	112	95	142	84	9	6	126	111	90	148	81	9	6	81.46	109	114	8	0.067	-3.903	-7.655	1.93632e-14	3.42425e-13	0	0.0677	0.066	0.066	TRUE	0.1131					sigP:1^18^0.887^YES		phospholipase B domain containing 1 precursor [Danio rerio]	PLB_CROAD	Phospholipase B;	PLBD1	phospholipase B domain containing	GO:0005575,GO:0005576,GO:0005622,GO:0005623,GO:0005737,GO:0005829,GO:0006066,GO:0006576,GO:0006629,GO:0006644,GO:0006650,GO:0006793,GO:0006796,GO:0006807,GO:0008150,GO:0008152,GO:0008610,GO:0008654,GO:0009058,GO:0009308,GO:0009987,GO:0019637,GO:0034641,GO:0036149,GO:0036151,GO:0036152,GO:0042439,GO:0044106,GO:0044237,GO:0044238,GO:0044249,GO:0044255,GO:0044281,GO:0044424,GO:0044444,GO:0044464,GO:…
NVE7681	3249	5319	3582	4615	5483	252	316	3502	5264	3390	4813	5273	239	314	3256.38	4052	5043	276	0.068	-3.872	-17.877	1.77438e-71	1.32523e-68	0.0417	0.0153	0.0248	0.0248	TRUE	0.556	e_gw.193.43.1	122783	NEMVEDRAFT_v1g122783		sigP:1^20^0.929^YES			HMCN1_HUMAN	Hemicentin-1;		Thrombospondin type 1 domain
NVE12486	762	1194	811	851	966	42	86	821	1182	767	887	929	40	86	673.18	923	908	63	0.068	-3.884	-13.613	3.34143e-42	4.37825e-40	0.0789	0.0205	0.0372	0.0372	TRUE	0.4761	gw.29.180.1	60648	NEMVEDRAFT_v1g60648				Neurogenic locus Notch protein [Crassostrea gigas]	FBP1_STRPU	Fibropellin-1;		Notch ligand involved in the mediation of Notch signaling (By similarity)	GO:0005575,GO:0016020
NVE11004	633	611	415	766	538	20	58	682	605	393	799	517	19	58	438.93	560	658	38	0.068	-3.873	-10.516	7.277e-26	3.20331e-24	0.1698	0.0239	0.0622	0.0622	TRUE	0.3539	estExt_fgenesh1_pg.C_2530011	246912	NEMVEDRAFT_v1g246912
NVE23760	13	48	25	38	59	4	0	14	48	24	40	57	4	0	26.48	29	48	2	0.068	-3.881	-4.07	4.70828e-05	0.000244879	0.2981	0.1792	0.2081	0.2081	TRUE	0.4209	fgenesh1_pg.scaffold_786000002	221476	NEMVEDRAFT_v1g221476		sigP:1^16^0.756^YES		astacin 2 [Hydractinia echinata]	NAS6_CAEEL	Zinc metalloproteinase nas-6;		astacin-like metalloendopeptidase (M12 family)
NVE19071	10	25	8	11	2	1	1	11	25	8	11	2	1	1	8.35	15	6	1	0.068	-3.885	-2.783	0.00537831	0.0171125	0	0.5381	0.4954	0.4954	TRUE	0.5236	fgenesh1_pg.scaffold_5000200	197394	NEMVEDRAFT_v1g197394	*				DBP_BOVIN	D site-binding protein;
NVE10535	3010	3631	3187	2603	2679	167	298	3244	3593	3016	2715	2576	159	296	2228.47	3284	2646	228	0.069	-3.853	-17.446	3.67166e-68	2.41963e-65	0.0474	0.0159	0.0254	0.0254	TRUE	0.0549	e_gw.242.69.1	127768	NEMVEDRAFT_v1g127768		sigP:1^22^0.713^YES		glycoside hydrolase [Ruminiclostridium thermocellum]	XYNA_STRSQ	Endo-1,4-beta-xylanase A;		Glyco_10
NVE23421	819	1312	888	851	929	63	79	883	1298	840	887	893	60	79	705.82	1007	890	70	0.069	-3.865	-15.714	1.21193e-55	3.23267e-53	0.0357	0.0202	0.026	0.026	TRUE	0.5105	estExt_fgenesh1_pg.C_760015	242962	NEMVEDRAFT_v1g242962			Ripply	RecName: Full=Protein ripply2 [Danio rerio]	RIPP2_DANRE	Protein ripply2;
NVE10951	403	676	497	447	565	29	45	434	669	470	466	543	28	45	379.35	524	504	36	0.069	-3.863	-13.296	2.43411e-40	2.88565e-38	0.044	0.0255	0.0317	0.0317	TRUE	0.4525	e_gw.251.27.1	128516	NEMVEDRAFT_v1g128516		sigP:1^27^0.516^YES		N [Drosophila yakuba]	NOTCH_DROME	Neurogenic locus Notch protein;		Notch ligand involved in the mediation of Notch signaling (By similarity)	GO:0005575,GO:0016020
NVE25192	652	605	475	792	598	27	56	703	599	450	826	575	26	56	461.9	584	700	41	0.069	-3.847	-12.237	1.96869e-34	1.59821e-32	0.0937	0.0234	0.0419	0.0419	TRUE	0.1287	fgenesh1_pg.scaffold_9000008	198219	NEMVEDRAFT_v1g198219		sigP:1^25^0.673^YES		collagen, type XXII, alpha 1 precursor [Gallus gallus]	MATN2_HUMAN	Matrilin-2;
NVE25287	253	360	281	261	284	16	26	273	356	266	272	273	15	26	211.6	298	272	20	0.069	-3.866	-12.108	9.55859e-34	7.35979e-32	0.0173	0.0346	0.0289	0.0289	TRUE	0.2185	fgenesh1_pg.scaffold_9000119,fgenesh1_pg.scaffold_9000117	198330	NEMVEDRAFT_v1g198330,NEMVEDRAFT_v1g198328					CNBD2_HUMAN	Cyclic nucleotide-binding domain-containing protein 2;
NVE6129	172	297	271	180	211	16	19	185	294	256	188	203	15	19	165.78	245	196	17	0.069	-3.85	-10.893	1.2479e-27	6.21343e-26	0	0.0404	0.0361	0.0361	TRUE	0.144	estExt_fgenesh1_pg.C_170022	239599	NEMVEDRAFT_v1g239599					FUCL1_ANGJA	Fucolectin-1;		F5/8 type C domain
NVE24395	205	206	155	223	137	13	14	221	204	147	233	132	12	14	137.44	191	182	13	0.069	-3.858	-9.288	1.56593e-20	4.72859e-19	0.0648	0.0458	0.0529	0.0529	TRUE	0.2957	estExt_fgenesh1_pg.C_820052	243220	NEMVEDRAFT_v1g243220
NVE22674	1254	1607	1328	2225	2184	103	100	1351	1590	1257	2320	2100	98	99	1259.51	1399	2210	98	0.07	-3.826	-20.585	3.76982e-94	9.38517e-91	0.0091	0.0174	0.0137	0.0137	TRUE	0.1144	e_gw.708.4.1	142824	NEMVEDRAFT_v1g142824		sigP:1^21^0.707^YES		matrix metalloproteinase 1 isoform 2 [Bombyx mori]	MMP7_HUMAN	Matrilysin;		Matrixin
NVE25759	2239	2618	2052	3809	3463	127	207	2413	2591	1942	3972	3330	121	206	2082.12	2315	3651	164	0.07	-3.827	-17.133	8.38173e-66	4.36747e-63	0.0449	0.0161	0.025	0.025	TRUE	0.1611					sigP:1^19^0.909^YES		gp431 [Bacillus phage G]
NVE144	1725	2012	1360	1903	1608	70	173	1859	1991	1287	1985	1546	67	172	1272.39	1712	1766	120	0.07	-3.846	-12.476	1.01014e-35	9.01721e-34	0.1245	0.0174	0.0496	0.0496	TRUE	0.3807	estExt_gwp.C_10467	157790	NEMVEDRAFT_v1g157790		sigP:1^24^0.72^YES		dickkopf-3 related protein precursor [Hydra vulgaris]
NVE16204	830	886	582	1039	715	40	71	895	877	551	1084	688	38	71	600.26	774	886	54	0.07	-3.836	-12.318	7.26574e-35	6.0519e-33	0.0906	0.0213	0.0446	0.0446	TRUE	0.5056	fgenesh1_pg.scaffold_393000006	219239	NEMVEDRAFT_v1g219239		sigP:1^20^0.868^YES
NVE22350	7	21	14	1	27	1	1	8	21	13	1	26	1	1	10.08	14	14	1	0.07	-3.836	-2.641	0.00825403	0.0246784	0	0.4482	0.5867	0.5867	TRUE	0.0992	gw.6973.1.1	5160	NEMVEDRAFT_v1g5160								Collagen triple helix repeat (20 copies)
NVE16015	1560	1677	1172	1898	1474	83	134	1681	1660	1109	1979	1418	79	133	1151.28	1483	1698	106	0.071	-3.807	-14.44	2.88537e-47	5.09052e-45	0.0649	0.0178	0.0343	0.0343	TRUE	0.392	estExt_fgenesh1_pg.C_3870003	247995	NEMVEDRAFT_v1g247995		sigP:1^29^0.535^YES
NVE20340	527	679	487	701	664	31	51	568	672	461	731	639	29	51	450.08	567	685	40	0.071	-3.826	-14.078	5.21028e-45	7.73122e-43	0.0354	0.0237	0.0273	0.0273	TRUE	0.0812	e_gw.56.108.1	100342	NEMVEDRAFT_v1g100342		sigP:1^31^0.707^YES	MMPI	N-acetylated-alpha-linked acidic dipeptidase 2 [Cuculus canorus]	FOLH1_PIG	Glutamate carboxypeptidase 2;	NAALAD2	N-acetylated alpha-linked acidic	GO:0001505,GO:0003008,GO:0003674,GO:0003824,GO:0004180,GO:0004181,GO:0005575,GO:0005622,GO:0005623,GO:0005634,GO:0005737,GO:0005886,GO:0005887,GO:0006082,GO:0006508,GO:0006520,GO:0006575,GO:0006725,GO:0006732,GO:0006760,GO:0006807,GO:0007154,GO:0007267,GO:0007268,GO:0008150,GO:0008152,GO:0008233,GO:0008235,GO:0008236,GO:0008237,GO:0008238,GO:0008239,GO:0009056,GO:0009987,GO:0016020,GO:0016021,GO:…
NVE20928	748	1034	588	951	851	39	76	806	1023	556	992	818	37	76	615.52	795	905	56	0.071	-3.823	-12.434	1.7142e-35	1.51214e-33	0.0958	0.0211	0.0436	0.0436	TRUE	0.0892	e_gw.6.35.1	82501	NEMVEDRAFT_v1g82501				sialin, putative [Pediculus humanus corporis]	VGLU1_XENLA	Vesicular glutamate transporter 1;		Major Facilitator Superfamily
NVE18059	62	69	53	42	46	5	4	67	68	50	44	44	5	4	40.29	62	44	4	0.071	-3.819	-6.217	5.08357e-10	5.65273e-09	0	0.1226	0.0777	0.0777	TRUE	0.1613							regucalcin [Coregonus maraena]	RGN_XENLA	Regucalcin;	RGN	regucalcin (senescence marker protein-30)	GO:0000003,GO:0002165,GO:0003674,GO:0003824,GO:0004341,GO:0005488,GO:0005509,GO:0005575,GO:0005576,GO:0005615,GO:0005622,GO:0005623,GO:0005634,GO:0005737,GO:0005811,GO:0005829,GO:0006140,GO:0006873,GO:0006874,GO:0006875,GO:0006950,GO:0007275,GO:0007444,GO:0007472,GO:0007476,GO:0007552,GO:0007560,GO:0008150,GO:0008152,GO:0008270,GO:0009118,GO:0009266,GO:0009409,GO:0009628,GO:0009631,GO:0009653,GO:…
NVE8051	583	852	789	803	1403	54	56	628	843	747	837	1349	51	56	644.55	739	1093	54	0.072	-3.79	-14.368	8.1936e-47	1.4122e-44	0.041	0.0208	0.0287	0.0287	TRUE	0.1231	e_gw.2.396.1	79796	NEMVEDRAFT_v1g79796		sigP:1^22^0.753^YES		Sushi, von Willebrand factor type A, EGF and pentraxin domain-containing protein 1 [Myotis brandtii]	SVEP1_RAT	Sushi, von Willebrand factor type A, EGF and pentraxin domain-containing protein 1;		HYR domain
NVE24437	188	298	269	234	338	12	25	203	295	255	244	325	11	25	193.92	251	284	18	0.072	-3.797	-10.617	2.4802e-26	1.13643e-24	0.0486	0.0365	0.0398	0.0398	TRUE	0.1043	e_gw.822.3.1	143475	NEMVEDRAFT_v1g143475								MAC/Perforin domain
NVE25660	146	178	159	220	159	12	12	157	176	150	229	153	11	12	127.09	161	191	12	0.072	-3.79	-9.518	1.76911e-21	5.72814e-20	0	0.0484	0.0389	0.0389	TRUE	0.046
NVE867	62	96	65	83	113	6	5	67	95	62	87	109	6	5	61.32	75	98	6	0.072	-3.801	-6.813	9.57704e-12	1.27198e-10	0	0.0853	0.0649	0.0649	TRUE	0.3593					sigP:1^19^0.929^YES
NVE6533	50	65	47	55	50	1	7	54	64	44	57	48	1	7	39.43	54	52	4	0.072	-3.795	-5.715	1.09522e-08	1.02248e-07	0.0153	0.1249	0.0975	0.0975	TRUE	0.0803
NVE13968	11	23	6	27	28	1	1	12	23	6	28	27	1	1	13.9	14	28	1	0.072	-3.787	-3.02	0.00253058	0.00878256	0	0.3286	0.2769	0.2769	TRUE	0.3016					sigP:1^20^0.674^YES						protein Hydra magnipapillata
NVE26086	2252	3253	2775	2442	2986	232	181	2427	3219	2626	2547	2872	220	180	2013.02	2757	2710	200	0.073	-3.783	-20.707	2.99504e-95	8.38837e-92	0.0151	0.0161	0.0162	0.0162	TRUE	0.1737	estExt_gwp.C_980100,fgenesh1_pm.scaffold_98000010	168038	NEMVEDRAFT_v1g168038,NEMVEDRAFT_v1g229711		sigP:1^16^0.871^YES		Apical endosomal glycoprotein [Crassostrea gigas]	MLRP2_ACRMI	MAM and LDL-receptor class A domain-containing protein 2;		MAM domain containing glycosylphosphatidylinositol anchor
NVE18974	5167	5509	4173	5353	5316	224	520	5569	5452	3949	5582	5112	213	517	3770.61	4990	5347	365	0.073	-3.774	-13.345	1.26803e-40	1.53575e-38	0.1026	0.0151	0.0444	0.0444	TRUE	0.2707
NVE4084	503	607	338	584	475	35	38	542	601	320	609	457	33	38	371.36	488	533	36	0.073	-3.779	-11.924	8.83838e-33	6.53573e-31	0.066	0.0258	0.0407	0.0407	TRUE	0.593	e_gw.142.81.1	116940	NEMVEDRAFT_v1g116940		sigP:1^23^0.741^YES		thrombospondin 1 precursor [Sus scrofa]	MLP_ACRMI	Mucin-like protein {ECO:0000303|PubMed:23765379};	HMCN1	G2F domain
NVE6547	114	120	107	140	103	4	13	123	119	101	146	99	4	13	86.38	114	122	8	0.073	-3.784	-7.911	2.55098e-15	4.91887e-14	0.037	0.0646	0.0581	0.0581	TRUE	0.0678								CFAD_DICDI	Counting factor associated protein D;
NVE14682	42	82	77	57	64	3	7	45	81	73	59	62	3	7	47.16	66	60	5	0.073	-3.771	-6.216	5.09184e-10	5.65911e-09	0.0445	0.1067	0.0865	0.0865	TRUE	0.4319	e_gw.343.31.1	134613	NEMVEDRAFT_v1g134613
NVE12191	27	41	32	42	32	1	4	29	41	30	44	31	1	4	25.64	33	38	2	0.073	-3.773	-4.642	3.45636e-06	2.2241e-05	0	0.1846	0.1297	0.1297	TRUE	0.1702	e_gw.28.246.1	91746	NEMVEDRAFT_v1g91746					MLRP1_ACRMI	MAM and LDL-receptor class A domain-containing protein 1;		MAM domain containing 4
NVE15608	1267	1529	1183	1562	1633	114	89	1365	1513	1120	1629	1570	108	89	1056.34	1333	1600	98	0.074	-3.758	-18.909	9.58879e-80	1.19359e-76	0.0143	0.0181	0.0165	0.0165	TRUE	0.1577	estExt_fgenesh1_pm.C_3730001	236044	NEMVEDRAFT_v1g236044		sigP:1^16^0.901^YES		novel protein containing trypsin domain [Xenopus (Silurana) tropicalis]	KLKB1_RAT	Plasma kallikrein;		serine protease	GO:0003674,GO:0003824,GO:0004175,GO:0004252,GO:0006508,GO:0008150,GO:0008152,GO:0008233,GO:0008236,GO:0016787,GO:0017171,GO:0019538,GO:0043170,GO:0044238,GO:0070011,GO:0071704
NVE6415	222	281	270	71	78	19	20	239	278	256	74	75	18	20	137.12	258	74	19	0.074	-3.765	-11.663	1.96265e-31	1.29339e-29	0	0.0459	0.0277	0.0277	TRUE	0.0359
NVE3840	359	445	229	429	370	22	31	387	440	217	447	356	21	31	271.28	348	402	26	0.074	-3.752	-10.592	3.25417e-26	1.47299e-24	0.0834	0.0301	0.0486	0.0486	TRUE	0.4564	estExt_fgenesh1_pg.C_140068	239379	NEMVEDRAFT_v1g239379				C. briggsae CBR-TAG-271 protein [Caenorhabditis briggsae]	PK1L2_MOUSE	Polycystic kidney disease protein 1-like 2;		Galactose binding lectin domain
NVE547	335	435	276	447	402	12	41	361	430	261	466	387	11	41	279.66	351	426	26	0.074	-3.757	-10.055	8.76528e-24	3.35718e-22	0.1573	0.0296	0.0569	0.0569	TRUE	0.1313	estExt_fgenesh1_pg.C_1010044	243898	NEMVEDRAFT_v1g243898		sigP:1^17^0.823^YES
NVE1557	135	226	169	165	181	11	16	145	224	160	172	174	10	16	128.8	176	173	13	0.074	-3.747	-9.607	7.44692e-22	2.49411e-20	0.0288	0.0479	0.041	0.041	TRUE	0.3939	e_gw.112.65.1	112587	NEMVEDRAFT_v1g112587		sigP:1^25^0.799^YES			NECB_HYDVU	PC3-like endoprotease variant B;		Proprotein convertase P-domain
NVE9658	76	91	66	79	84	9	3	82	90	62	82	81	9	3	58.45	78	82	6	0.074	-3.748	-6.887	5.7097e-12	7.77227e-11	0.0124	0.0888	0.0653	0.0653	TRUE	0.1958	fgenesh1_pg.scaffold_2231000001	223067	NEMVEDRAFT_v1g223067					TENA_DROME	Teneurin-a;
NVE533	381	560	382	495	542	21	47	411	554	362	516	521	20	47	347.21	442	518	34	0.075	-3.735	-11.948	6.65564e-33	4.95436e-31	0.0723	0.0266	0.0379	0.0379	TRUE	0.3812	gw.101.28.1	21316	NEMVEDRAFT_v1g21316				Synaptic vesicle 2-related protein [Zootermopsis nevadensis]	SVOP_XENLA	Synaptic vesicle 2-related protein;	SVOP	SV2 related protein homolog (rat)	GO:0003674,GO:0005215,GO:0005575,GO:0005622,GO:0005623,GO:0005737,GO:0006810,GO:0006811,GO:0006812,GO:0008021,GO:0008150,GO:0008324,GO:0009987,GO:0012506,GO:0015075,GO:0015101,GO:0015695,GO:0016020,GO:0016023,GO:0022857,GO:0022891,GO:0022892,GO:0030135,GO:0030136,GO:0030659,GO:0030662,GO:0030665,GO:0030672,GO:0031090,GO:0031410,GO:0031982,GO:0031988,GO:0034220,GO:0043226,GO:0043227,GO:0043229,GO:…
NVE20669	343	345	251	408	356	26	23	370	341	238	425	342	25	23	252.01	316	384	24	0.075	-3.731	-11.758	6.44873e-32	4.45957e-30	0.0338	0.0313	0.0323	0.0323	TRUE	0.362	gw.58.99.1	31229	NEMVEDRAFT_v1g31229				Peptide-N4-N-acetyl-beta-D-glucosaminylasparagine amidase F precursor [Salmo salar]
NVE4441	135	217	174	151	199	14	13	145	215	165	157	191	13	13	128.57	175	174	13	0.075	-3.738	-9.703	2.92605e-22	1.01174e-20	0	0.048	0.0388	0.0388	TRUE	0.2825	fgenesh1_pg.scaffold_147000046	211989	NEMVEDRAFT_v1g211989
NVE24056	269	355	185	218	141	17	25	290	351	175	227	136	16	25	174.32	272	182	20	0.075	-3.732	-9.321	1.15257e-20	3.49925e-19	0.1063	0.0391	0.0625	0.0625	TRUE	0.1273								B4GN3_MOUSE	Beta-1,4-N-acetylgalactosaminyltransferase 3;		PA14 domain
NVE4235	204	215	81	190	198	9	17	220	213	77	198	190	9	17	131.9	170	194	13	0.075	-3.741	-7.617	2.60196e-14	4.53694e-13	0.1822	0.0471	0.0907	0.0907	TRUE	1.6588	fgenesh1_pg.scaffold_144000033	211816	NEMVEDRAFT_v1g211816		sigP:1^15^0.856^YES		RecName: Full=Toxin PsTX-60B; Flags: Precursor	TX60B_PHYSE	DELTA-alicitoxin-Pse2b {ECO:0000303|PubMed:22683676};
NVE9231	2463	3214	2547	2550	2897	154	271	2654	3181	2410	2659	2786	146	269	2015.23	2748	2722	208	0.076	-3.726	-16.327	6.36521e-60	2.09734e-57	0.0515	0.0161	0.0271	0.0271	TRUE	0.1532					sigP:1^20^0.885^YES
NVE719	511	776	547	552	567	44	52	551	768	518	576	545	42	52	435.83	612	560	47	0.076	-3.712	-14.412	4.3282e-47	7.57637e-45	0.0268	0.024	0.0251	0.0251	TRUE	0.3899	fgenesh1_pg.scaffold_103000043	209268	NEMVEDRAFT_v1g209268					EVA1C_MOUSE	Protein eva-1 homolog C;		Galactose binding lectin domain
NVE24625	484	600	367	532	497	30	46	522	594	347	555	478	29	46	367.1	488	516	38	0.076	-3.718	-12.341	5.45097e-35	4.59152e-33	0.0551	0.0259	0.0358	0.0358	TRUE	0.2663	estExt_fgenesh1_pg.C_840046	243289	NEMVEDRAFT_v1g243289		sigP:1^22^0.663^YES			GAPR1_MOUSE	Golgi-associated plant pathogenesis-related protein 1;		GLI pathogenesis-related 2
NVE14770	982	1135	992	1250	1138	40	121	1058	1123	939	1304	1094	38	120	810.95	1040	1199	79	0.076	-3.719	-11.787	4.56232e-32	3.19448e-30	0.1356	0.0194	0.0496	0.0496	TRUE	0.0581	e_gw.347.11.1	134893	NEMVEDRAFT_v1g134893				sodium/potassium/calcium exchanger 4 isoform 2 [Homo sapiens]	NCKX5_HUMAN	Sodium/potassium/calcium exchanger 5;
NVE17198	112	137	114	120	80	7	12	121	136	108	125	77	7	12	83.55	122	101	10	0.076	-3.713	-8.041	8.9193e-16	1.79234e-14	0.0377	0.0663	0.0566	0.0566	TRUE	0.0715					sigP:1^19^0.839^YES		Ganglioside GM2 activator [Crassostrea gigas]	SAP3_MOUSE	Ganglioside GM2 activator;	GM2A	GM2 ganglioside activator	GO:0000323,GO:0001573,GO:0003008,GO:0003674,GO:0003824,GO:0004553,GO:0004563,GO:0005215,GO:0005319,GO:0005488,GO:0005575,GO:0005622,GO:0005623,GO:0005634,GO:0005730,GO:0005737,GO:0005739,GO:0005764,GO:0005773,GO:0005775,GO:0005886,GO:0005938,GO:0005975,GO:0006629,GO:0006643,GO:0006644,GO:0006664,GO:0006665,GO:0006672,GO:0006687,GO:0006689,GO:0006793,GO:0006796,GO:0006807,GO:0006810,GO:0006869,GO:…
NVE19431	54	99	78	69	102	8	4	58	98	74	72	98	8	4	58.8	77	85	6	0.076	-3.721	-6.669	2.57233e-11	3.3143e-10	0	0.0884	0.074	0.074	TRUE	0.1375
NVE7112	34	50	31	50	22	0	6	37	49	29	52	21	0	6	27.82	38	36	3	0.076	-3.71	-4.422	9.77679e-06	5.79214e-05	0.3156	0.1712	0.197	0.197	TRUE	0.1573	fgenesh1_pg.scaffold_183000013	213727	NEMVEDRAFT_v1g213727
NVE10073	700	1027	748	796	949	50	81	754	1016	708	830	913	48	81	621.35	826	872	64	0.077	-3.693	-14.609	2.47109e-48	4.57581e-46	0.0405	0.021	0.0272	0.0272	TRUE	0.3217	e_gw.232.31.1	126479	NEMVEDRAFT_v1g126479		sigP:1^21^0.887^YES			GAPR1_HUMAN	Golgi-associated plant pathogenesis-related protein 1;		GLI pathogenesis-related 2
NVE19791	2396	5636	3494	2058	4207	341	264	2582	5578	3307	2146	4046	324	263	2606.42	3822	3096	294	0.077	-3.704	-7.621	2.50992e-14	4.38326e-13	0.1341	0.0157	0.0531	0.1341	TRUE	0.3349	fgenesh1_pg.scaffold_53000081	204742	NEMVEDRAFT_v1g204742				type 1 collagen alpha 1 [Paralichthys olivaceus]	COA_ACRMI	Collagen alpha chain;		Collagen triple helix repeat (20 copies)
NVE9859	785	1115	995	984	993	33	118	846	1103	942	1026	955	31	117	717.27	964	990	74	0.077	-3.698	-6.669	2.57578e-11	3.31684e-10	0.169	0.0201	0.0603	0.169	TRUE	0.1281	e_gw.229.17.1	126198	NEMVEDRAFT_v1g126198				N-acetylated-alpha-linked acidic dipeptidase 2 [Chaetura pelagica]	FOLH1_MOUSE	Glutamate carboxypeptidase 2;
NVE25820	1047	1266	777	1184	1065	38	124	1128	1253	735	1235	1024	36	123	790.7	1039	1130	80	0.077	-3.705	-6.488	8.71552e-11	1.05843e-09	0.1803	0.0195	0.066	0.1803	TRUE	0.4251	estExt_fgenesh1_pg.C_940059	243673	NEMVEDRAFT_v1g243673		sigP:1^24^0.718^YES
NVE5605	39	127	83	50	99	9	4	42	126	79	52	95	9	4	58.02	82	74	6	0.077	-3.707	-5.889	3.87697e-09	3.83859e-08	0.2113	0.0894	0.1309	0.1309	TRUE	0.0875	estExt_fgenesh1_pg.C_1610023	245466	NEMVEDRAFT_v1g245466		sigP:1^19^0.768^YES		Acid trehalase-like protein 1 [Fukomys damarensis]	ATHL1_DANRE	Acid trehalase-like protein 1;	ATHL1	ATH1, acid trehalase-like 1 (yeast)	GO:0003674,GO:0003824,GO:0004553,GO:0004555,GO:0008150,GO:0008152,GO:0015927,GO:0016787,GO:0016798
NVE16011	639	896	553	737	679	41	71	689	887	523	769	653	39	71	518.55	700	711	55	0.078	-3.678	-12.786	1.95355e-37	1.95407e-35	0.0679	0.0224	0.0365	0.0365	TRUE	0.0867	estExt_fgenesh1_pg.C_3870001	247993	NEMVEDRAFT_v1g247993		sigP:1^22^0.659^YES			ANTR2_HUMAN	Anthrax toxin receptor 2;
NVE23350	164	208	150	176	192	19	9	177	206	142	184	185	18	9	131.39	175	184	14	0.078	-3.687	-9.634	5.72801e-22	1.92995e-20	0.021	0.0473	0.0392	0.0392	TRUE	0.0915
NVE142	1883	1908	1300	2013	1507	98	178	2029	1888	1230	2099	1449	93	177	1280.93	1716	1774	135	0.079	-3.669	-12.863	7.28973e-38	7.39066e-36	0.0915	0.0174	0.0423	0.0423	TRUE	0.4943	e_gw.1.16.1	79120	NEMVEDRAFT_v1g79120		sigP:1^18^0.669^YES		dickkopf-3 related protein precursor [Hydra vulgaris]	DKK3_MOUSE	Dickkopf-related protein 3;
NVE24829	83	83	91	142	149	5	9	89	82	86	148	143	5	9	80.4	86	146	7	0.079	-3.656	-7.631	2.32173e-14	4.06412e-13	0	0.0684	0.0421	0.0421	TRUE	0.0093							PMP1 protein [Podocoryna carnea]	MLT7_CAEEL	Peroxidase mlt-7 {ECO:0000303|PubMed:19406744};		to astacin family metalloendopeptidase FARM-1 Hydra magnipapillata
NVE2593	105	84	67	113	85	5	9	113	83	63	118	82	5	9	67.57	86	100	7	0.079	-3.664	-6.866	6.58024e-12	8.91396e-11	0.0649	0.0787	0.074	0.074	TRUE	0.1369	fgenesh1_pg.scaffold_126000017	210691	NEMVEDRAFT_v1g210691				PREDICTED: iron/zinc purple acid phospatase-like isoform X4 [Mus musculus]	PAPL_HUMAN
NVE22806	55	56	36	64	54	3	5	59	55	34	67	52	3	5	39.32	49	60	4	0.079	-3.668	-5.526	3.27937e-08	2.86016e-07	0	0.1252	0.0962	0.0962	TRUE	0.4193								FOLH1_MOUSE	Glutamate carboxypeptidase 2;
NVE20302	1357	1744	1374	1483	1449	86	158	1462	1726	1300	1547	1394	82	157	1095.37	1496	1470	120	0.08	-3.65	-15.141	8.70782e-52	1.80655e-49	0.0565	0.018	0.0283	0.0283	TRUE	0.1327	fgsh_est.C_scaffold_56000003	232545	NEMVEDRAFT_v1g232545		sigP:1^23^0.559^YES		Protein BM-NAS-15, isoform g [Brugia malayi]	NAS6_CAEEL	Zinc metalloproteinase nas-6;		astacin-like metalloendopeptidase (M12 family)
NVE251	1014	1117	801	1084	995	54	108	1093	1105	758	1130	957	51	107	743.19	985	1044	79	0.08	-3.637	-13.141	1.92125e-39	2.15238e-37	0.0784	0.0199	0.0364	0.0364	TRUE	0.3256	estExt_fgenesh1_pg.C_10304	237832	NEMVEDRAFT_v1g237832		sigP:1^19^0.799^YES		LOC734149 protein [Xenopus laevis]	CSL2_ONCKE	L-rhamnose-binding lectin CSL2 {ECO:0000303|Ref.1};		Galactose binding lectin domain
NVE10319	186	316	189	390	428	19	19	200	313	179	407	412	18	19	221.04	231	410	18	0.08	-3.643	-10.319	5.76537e-25	2.37898e-23	0.0465	0.0338	0.0385	0.0385	TRUE	0.7158	fgenesh1_pg.scaffold_24000011	200797	NEMVEDRAFT_v1g200797
NVE15610	311	290	233	340	280	8	38	335	287	221	355	269	8	38	215.99	281	312	23	0.08	-3.637	-8.816	1.18303e-18	3.04678e-17	0.2252	0.0342	0.0708	0.0708	TRUE	0.1156	fgenesh1_pm.scaffold_373000002	231086	NEMVEDRAFT_v1g231086				sialin, putative [Pediculus humanus corporis]	VGLU2_BOVIN	Vesicular glutamate transporter 2;	SLC17A8	solute carrier family 17	GO:0001504,GO:0001505,GO:0003001,GO:0003008,GO:0003333,GO:0003674,GO:0005215,GO:0005310,GO:0005313,GO:0005316,GO:0005326,GO:0005342,GO:0005436,GO:0005575,GO:0005622,GO:0005623,GO:0005737,GO:0005768,GO:0005769,GO:0005783,GO:0005886,GO:0006810,GO:0006811,GO:0006812,GO:0006814,GO:0006817,GO:0006820,GO:0006835,GO:0006836,GO:0006865,GO:0007154,GO:0007267,GO:0007268,GO:0007269,GO:0007270,GO:0007600,GO:…
NVE903	89	112	91	115	91	8	8	96	111	86	120	88	8	8	73.7	98	104	8	0.08	-3.65	-7.666	1.77915e-14	3.16378e-13	0	0.0733	0.0516	0.0516	TRUE	0.0921
NVE14456	61	107	49	122	126	5	7	66	106	46	127	121	5	7	68.3	73	124	6	0.08	-3.637	-6.386	1.70349e-10	1.99105e-09	0.0883	0.078	0.0816	0.0816	TRUE	0.3226					sigP:1^19^0.769^YES
NVE1489	72	72	55	72	55	2	9	78	71	52	75	53	2	9	48.53	67	64	6	0.08	-3.638	-6.092	1.11707e-09	1.18138e-08	0.0504	0.1041	0.0911	0.0911	TRUE	0.2311					sigP:1^23^0.853^YES
NVE7139	37	51	40	25	24	3	4	40	50	38	26	23	3	4	26.31	43	24	4	0.08	-3.65	-5.132	2.86208e-07	2.17826e-06	0	0.1802	0.1109	0.1109	TRUE	0.1303							Chain A, 2.1 Angstrom Resolution Crystal Structure Of S-layer Domain-containing Protein (residues 221-444) From Clostridium Thermocellum Atcc 27405
NVE14391	17	31	26	28	24	0	4	18	31	25	29	23	0	4	18.55	25	26	2	0.08	-3.651	-3.905	9.42871e-05	0.000463086	0.0152	0.2498	0.1895	0.1895	TRUE	0.0759	fgenesh1_pg.scaffold_334000006,fgenesh1_pg.scaffold_334000009,e_gw.334.4.1	218179,218182,134283	NEMVEDRAFT_v1g218179,NEMVEDRAFT_v1g218182,NEMVEDRAFT_v1g134283				cholinesterase precursor [Gallus gallus]	ACES_RABIT	Acetylcholinesterase;
NVE9417	272	347	228	322	297	19	28	293	343	216	336	286	18	28	217.09	284	311	23	0.081	-3.633	-11.055	2.07335e-28	1.09307e-26	0.0377	0.0341	0.0354	0.0354	TRUE	0.1349	estExt_fgenesh1_pg.C_220039	239933	NEMVEDRAFT_v1g239933
NVE22034	768	753	568	1006	631	37	79	828	745	538	1049	607	35	79	554.29	704	828	57	0.081	-3.632	-11.052	2.15475e-28	1.13332e-26	0.1206	0.0219	0.0514	0.0514	TRUE	0.3115	estExt_fgenesh1_pg.C_670078	242614	NEMVEDRAFT_v1g242614		sigP:1^19^0.642^YES
NVE18395	117	213	158	102	141	11	16	126	211	150	106	136	10	16	107.82	162	121	13	0.081	-3.625	-8.76	1.95855e-18	4.95857e-17	0.0473	0.0545	0.0519	0.0519	TRUE	0.2412	fgenesh1_pg.scaffold_472000014	220085	NEMVEDRAFT_v1g220085				secretion protein Por [Flavobacterium hydatis]	CABC2_BACTN	Chondroitin sulfate ABC exolyase {ECO:0000250|UniProtKB:C5G6D7};		Lyase, catalytic
NVE18958	2862	2764	2578	3817	3219	112	340	3084	2735	2440	3981	3096	106	338	2254.32	2753	3538	222	0.081	-3.631	-7.104	1.21131e-12	1.75782e-11	0.1479	0.0159	0.0579	0.1479	TRUE	0.0896					sigP:1^17^0.743^YES					COL4A1	collagen, type IV, alpha	GO:0000003,GO:0000902,GO:0000904,GO:0001101,GO:0001655,GO:0001700,GO:0001822,GO:0002009,GO:0002119,GO:0002164,GO:0003006,GO:0003674,GO:0005102,GO:0005178,GO:0005198,GO:0005201,GO:0005488,GO:0005515,GO:0005575,GO:0005576,GO:0005578,GO:0005581,GO:0005587,GO:0005604,GO:0005605,GO:0005622,GO:0005623,GO:0005737,GO:0005783,GO:0005788,GO:0005811,GO:0006139,GO:0006351,GO:0006725,GO:0006807,GO:0006810,GO:…
NVE9235	48	92	78	100	119	5	7	52	91	74	104	114	5	7	63.86	72	109	6	0.081	-3.631	-6.664	2.65947e-11	3.41674e-10	0	0.0825	0.0657	0.0657	TRUE	0.1336	e_gw.216.1.1	125015	NEMVEDRAFT_v1g125015		sigP:1^20^0.702^YES		Sushi, von Willebrand factor type A, EGF and pentraxin domain-containing protein 1 [Crassostrea gigas]	SVEP1_MOUSE	Sushi, von Willebrand factor type A, EGF and pentraxin domain-containing protein 1;		HYR domain
NVE24261	47	61	74	69	51	4	6	51	60	70	72	49	4	6	44.55	60	60	5	0.081	-3.634	-6.072	1.26002e-09	1.32421e-08	0	0.1122	0.08	0.08	TRUE	0.0723
NVE5866	60	88	49	69	48	2	9	65	87	46	72	46	2	9	46.73	66	59	6	0.081	-3.618	-5.78	7.47681e-09	7.10455e-08	0.1223	0.1076	0.1114	0.1114	TRUE	0.0835
NVE23674	755	1097	468	1020	602	34	95	814	1086	443	1064	579	32	94	587.37	781	822	63	0.081	-3.623	-5.509	3.61089e-08	3.13345e-07	0.2397	0.0214	0.0875	0.2397	TRUE	0.1072	fgenesh1_pg.scaffold_78000025	207223	NEMVEDRAFT_v1g207223		sigP:1^20^0.801^YES		glycosyl hydrolase family 5 [Clostridium botulinum]	GUNE_CLOTM			Cellulase (glycosyl hydrolase family 5)
NVE4053	599	635	382	791	479	15	75	646	628	362	825	461	14	75	429.98	545	643	44	0.081	-3.619	-4.664	3.10794e-06	2.01903e-05	0.3333	0.0241	0.1025	0.3333	TRUE	0.68	e_gw.141.108.1	116714	NEMVEDRAFT_v1g116714				major facilitator superfamily domain-containing protein 6 [Homo sapiens]	MFSD6_HUMAN	Major facilitator superfamily domain-containing protein 6;		major facilitator superfamily domain containing 6
NVE3815	585	764	556	892	643	47	61	630	756	526	930	618	45	61	509.52	637	774	53	0.082	-3.6	-13.277	3.14987e-40	3.65679e-38	0.0445	0.0226	0.0307	0.0307	TRUE	0.1018	e_gw.14.191.1	86806	NEMVEDRAFT_v1g86806	*		TEF-4		TEAD4_HUMAN	Transcriptional enhancer factor TEF-3;	TEAD4	TEA domain family member
NVE23756	78	124	45	76	61	7	7	84	123	43	79	59	7	7	57.27	83	69	7	0.082	-3.61	-6.111	9.88547e-10	1.05223e-08	0.1445	0.0904	0.1106	0.1106	TRUE	0.065	estExt_fgenesh1_pg.C_78550001	248888	NEMVEDRAFT_v1g248888
NVE2362	22	55	30	31	27	3	3	24	54	28	32	26	3	3	24.38	35	29	3	0.082	-3.608	-4.512	6.42934e-06	3.94565e-05	0	0.1934	0.1573	0.1573	TRUE	1.0446					sigP:1^19^0.734^YES			CO6_BOVIN	Complement component C6;		MAC/Perforin domain
NVE24677	20	32	19	28	15	3	1	22	32	18	29	14	3	1	16.95	24	22	2	0.082	-3.615	-3.789	0.000151115	0.000710575	0	0.272	0.2067	0.2067	TRUE	0.344	gw.846.1.1	438	NEMVEDRAFT_v1g438				angiotensin I converting enzyme 3 precursor [Mus musculus]	ACE_RAT	Angiotensin-converting enzyme;		Angiotensin I converting enzyme peptidyl-dipeptidase A
NVE19836	460	450	318	560	476	25	45	496	445	301	584	458	24	45	336.04	414	521	34	0.083	-3.599	-11.406	3.92073e-30	2.33638e-28	0.0668	0.027	0.0394	0.0394	TRUE	0.4138	estExt_fgenesh1_pg.C_530136	241940	NEMVEDRAFT_v1g241940		sigP:1^21^0.625^YES
NVE10584	100	141	110	172	311	12	8	108	140	104	179	299	11	8	121.32	117	239	10	0.083	-3.593	-8.072	6.90196e-16	1.41358e-14	0.0519	0.05	0.0507	0.0507	TRUE	0.1893							Neuropilin-2 [Myotis brandtii]	NRP1A_DANRE	Neuropilin-1a;	EDIL3	Milk fat globule-EGF factor 8 protein	GO:0001669,GO:0001786,GO:0002080,GO:0003674,GO:0005102,GO:0005178,GO:0005488,GO:0005515,GO:0005543,GO:0005575,GO:0005576,GO:0005615,GO:0005622,GO:0005623,GO:0005737,GO:0005886,GO:0006810,GO:0006897,GO:0006909,GO:0006910,GO:0006911,GO:0007155,GO:0008037,GO:0008150,GO:0008284,GO:0008289,GO:0008429,GO:0009719,GO:0009725,GO:0009897,GO:0009986,GO:0009987,GO:0010033,GO:0010324,GO:0010810,GO:0010811,GO:…
NVE18953	1029	1192	947	1126	1142	74	108	1109	1180	896	1174	1098	70	107	805	1062	1136	88	0.084	-3.581	-16.458	7.29276e-61	2.51387e-58	0.0222	0.0194	0.0203	0.0203	TRUE	0.1489					sigP:1^16^0.753^YES
NVE9994	592	867	587	681	709	42	75	638	858	556	710	682	40	75	508.29	684	696	58	0.084	-3.582	-13.049	6.4797e-39	7.11687e-37	0.0557	0.0226	0.0326	0.0326	TRUE	0.3052	estExt_fgenesh1_pg.C_230144	240045	NEMVEDRAFT_v1g240045		sigP:1^17^0.828^YES
NVE16548	428	596	379	849	670	45	36	461	590	359	885	644	43	36	431.15	470	764	40	0.084	-3.579	-12.367	3.9391e-35	3.35587e-33	0.0466	0.0241	0.0326	0.0326	TRUE	0.1417	gw.40.45.1	25219	NEMVEDRAFT_v1g25219		sigP:1^19^0.87^YES		chymotrypsinogen 1 [Thunnus orientalis]	CTRB_BOVIN	Chymotrypsinogen B;	CTRC	chymotrypsin-like elastase family member	GO:0003674,GO:0003824,GO:0004175,GO:0004252,GO:0005575,GO:0005576,GO:0005615,GO:0006508,GO:0007275,GO:0007399,GO:0008150,GO:0008152,GO:0008233,GO:0008236,GO:0009987,GO:0016787,GO:0017171,GO:0019538,GO:0022008,GO:0030154,GO:0032501,GO:0032502,GO:0043170,GO:0044238,GO:0044421,GO:0044699,GO:0044707,GO:0044763,GO:0048731,GO:0048856,GO:0048869,GO:0070011,GO:0071704
NVE24303	327	363	294	224	214	23	34	352	359	278	234	206	22	34	212.14	330	220	28	0.084	-3.571	-12.135	6.85724e-34	5.29805e-32	0.0146	0.0346	0.0277	0.0277	TRUE	0.1443	e_gw.81.115.1	106424	NEMVEDRAFT_v1g106424		sigP:1^19^0.829^YES		Phospholipase A2, major isoenzyme [Picoides pubescens]	PA2A2_PSETE	Acidic phospholipase A2 2;		phospholipase A2, group IB, pancreas
NVE6187	361	488	298	490	391	27	39	389	483	282	511	376	26	39	300.78	385	444	32	0.084	-3.58	-11.254	2.21845e-29	1.26159e-27	0.0589	0.0285	0.0392	0.0392	TRUE	0.0905	e_gw.17.299.1	88003	NEMVEDRAFT_v1g88003				CD151 antigen [Danio rerio]	CD63_HUMAN	CD63 antigen;	TSPAN4	tetraspanin	GO:0005575,GO:0005623,GO:0005886,GO:0005887,GO:0006461,GO:0008150,GO:0016020,GO:0016021,GO:0016043,GO:0022607,GO:0031224,GO:0031226,GO:0043933,GO:0044085,GO:0044425,GO:0044459,GO:0044464,GO:0065003,GO:0070271,GO:0071822,GO:0071840,GO:0071944
NVE19792	90	233	150	91	176	13	14	97	231	142	95	169	12	14	108.57	157	132	13	0.084	-3.576	-7.505	6.16016e-14	1.03312e-12	0.1355	0.0543	0.084	0.084	TRUE	0.161	fgenesh1_pg.scaffold_53000081	204742	NEMVEDRAFT_v1g204742								Collagen triple helix repeat (20 copies)
NVE16921	56	96	38	82	65	4	7	60	95	36	86	63	4	7	50.01	64	74	6	0.084	-3.572	-5.669	1.43713e-08	1.32022e-07	0.1364	0.1014	0.1138	0.1138	TRUE	0.1256	fgenesh1_pg.scaffold_411000014	219457	NEMVEDRAFT_v1g219457				CAP64 gene product - related [Cryptococcus neoformans var. neoformans JEC21]
NVE774	811	926	618	955	833	39	99	874	916	585	996	801	37	98	615.4	792	898	68	0.085	-3.55	-11.072	1.72356e-28	9.12959e-27	0.1203	0.0211	0.0501	0.0501	TRUE	0.4152					sigP:1^22^0.679^YES
NVE19080	41	59	37	59	66	4	4	44	58	35	62	63	4	4	38.62	46	62	4	0.085	-3.56	-5.44	5.31499e-08	4.51775e-07	0	0.1272	0.0881	0.0881	TRUE	0.1701	fgenesh1_pg.scaffold_5000218	197412	NEMVEDRAFT_v1g197412				RecName: Full=Major facilitator superfamily domain-containing protein 6-B; AltName: Full=Macrophage MHC class I receptor 2 homolog B	MFD6B_DANRE	Major facilitator superfamily domain-containing protein 6-B {ECO:0000250|UniProtKB:Q6ZSS7};		Major Facilitator Superfamily
NVE7532	142	307	158	216	295	21	15	153	304	150	225	284	20	15	164.31	202	254	18	0.086	-3.533	-8.622	6.56175e-18	1.58772e-16	0.0987	0.0406	0.0614	0.0614	TRUE	1.4105					sigP:1^22^0.886^YES
NVE22904	68	88	63	75	65	5	8	73	87	60	78	63	5	8	53.35	73	70	6	0.086	-3.534	-6.592	4.34395e-11	5.45269e-10	0	0.096	0.0681	0.0681	TRUE	0.0693	fgenesh1_pg.scaffold_721000002	221303	NEMVEDRAFT_v1g221303
NVE10898	5367	4396	3582	5526	3647	223	565	5784	4350	3390	5763	3507	212	562	3366.89	4508	4635	387	0.086	-3.543	-6.57	5.03077e-11	6.27264e-10	0.166	0.0153	0.0625	0.166	TRUE	0.1207	estExt_fgenesh1_kg.C_250013,estExt_fgenesh1_pg.C_250130	236565	NEMVEDRAFT_v1g236565,NEMVEDRAFT_v1g240186				calbindin-32 [Clonorchis sinensis]	CAB32_DROME	Calbindin-32;		Calbindin
NVE1605	934	1043	798	1142	984	31	132	1007	1032	755	1191	946	29	131	727.42	931	1068	80	0.086	-3.536	-5.42	5.95649e-08	5.0098e-07	0.2376	0.02	0.0766	0.2376	TRUE	0.2181	estExt_fgenesh1_pg.C_1130037	244207	NEMVEDRAFT_v1g244207					ANO8_MOUSE	Anoctamin-8;	ANO8	Anoctamin	GO:0005575,GO:0005622,GO:0005623,GO:0005886,GO:0016020,GO:0044464,GO:0071944
NVE4556	9	15	10	6	13	1	1	10	15	9	6	13	1	1	7.82	11	10	1	0.086	-3.544	-2.699	0.00695787	0.0213647	0	0.5737	0.359	0.359	TRUE	0.1887
NVE14238	615	834	870	962	1473	87	51	663	825	823	1003	1417	83	51	694.95	770	1210	67	0.087	-3.528	-14.092	4.25159e-45	6.35074e-43	0.0417	0.0203	0.0269	0.0269	TRUE	0.1175	fgenesh1_pg.scaffold_33000071,e_gw.33.283.1	202228	NEMVEDRAFT_v1g202227,NEMVEDRAFT_v1g93430		sigP:1^22^0.717^YES		enteropeptidase precursor [Bos taurus]	CTR2_CANFA		ST14	suppression of tumorigenicity 14 (colon carcinoma	GO:0003674,GO:0003824,GO:0005575,GO:0005576,GO:0005615,GO:0005623,GO:0005886,GO:0005887,GO:0006508,GO:0006928,GO:0007275,GO:0008150,GO:0008152,GO:0008233,GO:0008236,GO:0008544,GO:0009888,GO:0009987,GO:0016020,GO:0016021,GO:0016323,GO:0016477,GO:0016787,GO:0017171,GO:0019538,GO:0019897,GO:0019898,GO:0031224,GO:0031226,GO:0032501,GO:0032502,GO:0040011,GO:0043170,GO:0043588,GO:0044238,GO:0044421,GO:…
NVE7575	245	281	244	282	239	17	29	264	278	231	294	230	16	29	191.71	258	262	22	0.087	-3.523	-11.104	1.20338e-28	6.41977e-27	0.0162	0.0368	0.0305	0.0305	TRUE	0.0623	e_gw.190.17.1	122369	NEMVEDRAFT_v1g122369		sigP:1^26^0.603^YES		ectonucleotide pyrophosphatase/phosphodiesterase family member 5 precursor [Danio rerio]	ENPP5_HUMAN	Ectonucleotide pyrophosphatase/phosphodiesterase family member 5;		ectonucleotide pyrophosphatase phosphodiesterase
NVE4205	238	279	204	268	190	15	28	256	276	193	279	183	14	28	175.71	242	231	21	0.087	-3.527	-9.77	1.52177e-22	5.32761e-21	0.0611	0.0389	0.0457	0.0457	TRUE	0.2335	fgenesh1_pg.scaffold_144000001	211784	NEMVEDRAFT_v1g211784				Tricalbin-1 [Zootermopsis nevadensis]	YKH3_SCHPO	Uncharacterized protein PYUK71.03c;		Inherit from KOG: Multiple C2 domains, transmembrane
NVE8274	82	107	42	128	143	7	7	88	106	40	133	138	7	7	74.09	78	136	7	0.087	-3.517	-6.299	2.99238e-10	3.42252e-09	0.1179	0.073	0.0889	0.0889	TRUE	0.5399	fgenesh1_pg.scaffold_20000014	200176	NEMVEDRAFT_v1g200176		sigP:1^18^0.86^YES		CD209 antigen-like protein A [Esox lucius]	LECG_PATPE	Alpha-N-acetylgalactosamine-specific lectin {ECO:0000303|PubMed:11886841};	FCER2	Fc fragment of IgE, low affinity II, receptor for (CD23)	GO:0003674,GO:0005102,GO:0005178,GO:0005488,GO:0005515,GO:0005575,GO:0005576,GO:0005623,GO:0005886,GO:0005887,GO:0008150,GO:0009889,GO:0009891,GO:0009893,GO:0010556,GO:0010557,GO:0010604,GO:0016020,GO:0016021,GO:0019222,GO:0031224,GO:0031226,GO:0031341,GO:0031343,GO:0032403,GO:0032768,GO:0032770,GO:0043085,GO:0043900,GO:0043902,GO:0044093,GO:0044425,GO:0044459,GO:0044464,GO:0048518,GO:0050789,GO:…
NVE1663	568	462	232	585	391	17	59	612	457	220	610	376	16	59	335.69	430	493	38	0.087	-3.523	-4.75	2.02958e-06	1.35141e-05	0.3005	0.027	0.1028	0.3005	TRUE	0.1379	e_gw.114.78.1	112848	NEMVEDRAFT_v1g112848				nuclear transcriptional regulator 1-like protein [Homo sapiens]	NUPR1_RAT	Nuclear protein 1 {ECO:0000305};	NUPR1	nuclear protein transcriptional regulator 1	GO:0000003,GO:0002526,GO:0003006,GO:0003674,GO:0003682,GO:0005488,GO:0005575,GO:0005622,GO:0005623,GO:0005634,GO:0006461,GO:0006464,GO:0006473,GO:0006915,GO:0006917,GO:0006950,GO:0006952,GO:0006954,GO:0006974,GO:0007154,GO:0007165,GO:0007275,GO:0007517,GO:0007519,GO:0007548,GO:0008150,GO:0008152,GO:0008219,GO:0008285,GO:0008406,GO:0008584,GO:0008630,GO:0009611,GO:0009636,GO:0009888,GO:0009893,GO:…
NVE17223	429	504	413	980	1545	41	41	462	499	391	1022	1486	39	41	562.79	451	1254	40	0.088	-3.499	-13.363	9.96514e-41	1.2201e-38	0.0273	0.0217	0.024	0.024	TRUE	0.1053	e_gw.424.22.1	138161	NEMVEDRAFT_v1g138161		sigP:1^17^0.757^YES		MAM and CCP domain-containing astacin-like metallopeptidase protein [Tityus serrulatus]	MLRP1_ACRMI	MAM and LDL-receptor class A domain-containing protein 1;	MEP1A	Meprin A, alpha (PABA peptide hydrolase)	GO:0003674,GO:0003824,GO:0004175,GO:0004222,GO:0005575,GO:0005576,GO:0005615,GO:0005623,GO:0005886,GO:0005887,GO:0006508,GO:0007586,GO:0008150,GO:0008152,GO:0008233,GO:0008237,GO:0016020,GO:0016021,GO:0016787,GO:0017090,GO:0019538,GO:0022603,GO:0031224,GO:0031226,GO:0032501,GO:0032991,GO:0043170,GO:0043234,GO:0044238,GO:0044421,GO:0044425,GO:0044459,GO:0044464,GO:0044699,GO:0044707,GO:0045765,GO:…
NVE3845	17921	18954	13304	20863	16294	980	2066	19314	18758	12590	21757	15670	931	2055	13010.6	16887	18714	1493	0.088	-3.5	-12.254	1.59261e-34	1.30234e-32	0.108	0.0143	0.0466	0.0466	TRUE	0.4041	fgsh_est.C_scaffold_14000009	232015	NEMVEDRAFT_v1g232015		sigP:1^25^0.852^YES		nematogalectin [Hydra oligactis]	EVA1C_PANTR	Protein eva-1 homolog C;		Galactose binding lectin domain
NVE17888	761	1054	600	673	659	47	99	820	1043	568	702	634	45	98	558.53	810	668	72	0.088	-3.504	-11.231	2.88516e-29	1.62424e-27	0.1073	0.0218	0.0475	0.0475	TRUE	0.0692	e_gw.45.235.1	97028	NEMVEDRAFT_v1g97028				echinonectin [Lytechinus variegatus]	MFGM_HUMAN	Lactadherin;		FA58C
NVE2024	143	200	172	178	169	10	21	154	198	163	186	163	10	21	127.62	172	174	16	0.088	-3.506	-9.434	3.93596e-21	1.23514e-19	0.0131	0.0483	0.0387	0.0387	TRUE	0.1285	gw.119.138.1	59063	NEMVEDRAFT_v1g59063	*			GM26767 [Drosophila sechellia]	FOXB1_HUMAN	Forkhead box protein B1;		forkhead	GO:0000122,GO:0000981,GO:0001071,GO:0003674,GO:0003676,GO:0003677,GO:0003690,GO:0003700,GO:0003705,GO:0005488,GO:0005515,GO:0005575,GO:0005622,GO:0005623,GO:0005634,GO:0005654,GO:0005667,GO:0006139,GO:0006351,GO:0006355,GO:0006357,GO:0006366,GO:0006725,GO:0006807,GO:0007275,GO:0007389,GO:0008134,GO:0008150,GO:0008152,GO:0008301,GO:0009058,GO:0009059,GO:0009790,GO:0009888,GO:0009889,GO:0009890,GO:…
NVE15527	218	277	202	206	163	11	31	235	274	191	215	157	10	31	159.01	233	186	20	0.088	-3.507	-9.222	2.90963e-20	8.55553e-19	0.0941	0.0415	0.0532	0.0532	TRUE	0.0678	gw.37.207.1	61624	NEMVEDRAFT_v1g61624				cathepsin K-1 precursor [Acyrthosiphon pisum]	CATS_MOUSE	Cathepsin S;		Papain family cysteine protease
NVE22461	139	158	132	179	184	6	20	150	156	125	187	177	6	20	117.19	144	182	13	0.088	-3.5	-8.641	5.56364e-18	1.35646e-16	0.0081	0.0513	0.0459	0.0459	TRUE	0.0925	estExt_fgenesh1_pg.C_70112	238653	NEMVEDRAFT_v1g238653
NVE1185	148	402	128	181	176	23	18	160	398	121	189	169	22	18	153.75	226	179	20	0.088	-3.507	-7.399	1.36991e-13	2.20345e-12	0.2028	0.0424	0.0984	0.0984	TRUE	1.1543								HMCN1_HUMAN	Hemicentin-1;		F5/8 type C domain
NVE6130	52	121	130	80	77	6	12	56	120	123	83	74	6	12	67.7	100	78	9	0.088	-3.507	-6.669	2.57895e-11	3.31814e-10	0.1098	0.0786	0.0889	0.0889	TRUE	0.9314								HMCN1_HUMAN	Hemicentin-1;		Thrombospondin type 1 domain
NVE265	839	714	510	952	581	31	94	904	707	483	993	559	29	93	538.27	698	776	61	0.088	-3.506	-5.667	1.45007e-08	1.33102e-07	0.2106	0.0221	0.0767	0.2106	TRUE	0.0866
NVE1601	1466	2346	2141	1625	2123	168	195	1580	2322	2026	1695	2042	160	194	1431.09	1976	1868	177	0.089	-3.483	-16.931	2.67359e-64	1.22254e-61	0.0267	0.017	0.0209	0.0209	TRUE	0.1154								CO6_BOVIN	Complement component C6;		MAC/Perforin domain
NVE6865	1831	2223	1805	2099	2601	123	233	1973	2200	1708	2189	2501	117	232	1560.05	1960	2345	174	0.089	-3.493	-14.462	2.11367e-47	3.75864e-45	0.0609	0.0168	0.0301	0.0301	TRUE	0.0966					sigP:1^19^0.928^YES
NVE25239	2786	2831	2199	3561	2787	168	310	3003	2802	2081	3714	2680	160	308	2106.71	2629	3197	234	0.089	-3.491	-13.335	1.44081e-40	1.72635e-38	0.0779	0.0161	0.0369	0.0369	TRUE	0.2688	estExt_fgenesh1_pg.C_90062	238863	NEMVEDRAFT_v1g238863		sigP:1^25^0.781^YES		uncharacterized protein LOC734900 precursor [Xenopus laevis]	MATN1_CHICK	Cartilage matrix protein;
NVE5772	138	191	96	192	242	11	15	149	189	91	200	233	10	15	126.7	143	216	12	0.089	-3.496	-8.138	4.00464e-16	8.40937e-15	0.0739	0.0485	0.0575	0.0575	TRUE	0.1633	fgenesh1_pg.scaffold_164000008	212847	NEMVEDRAFT_v1g212847		sigP:1^19^0.785^YES		Ganglioside GM2 activator precursor [Salmo salar]	SAP3_MOUSE	Ganglioside GM2 activator;
NVE10599	83	155	88	148	109	11	9	89	153	83	154	105	10	9	86.38	108	130	10	0.089	-3.485	-7.235	4.6721e-13	7.11163e-12	0.0791	0.0646	0.07	0.07	TRUE	0.862	fgenesh1_pg.scaffold_244000002	215950	NEMVEDRAFT_v1g215950		sigP:1^17^0.628^YES		ADP-ribosyl cyclase 1 [Gallus gallus]	NADA_APLKU	ADP-ribosyl cyclase/cyclic ADP-ribose hydrolase;		ADP-ribosyl cyclase
NVE22139	1983	1938	1473	2355	1726	95	236	2137	1918	1394	2456	1660	90	235	1412.82	1816	2058	162	0.089	-3.483	-7.078	1.46678e-12	2.11485e-11	0.1358	0.0171	0.0542	0.1358	TRUE	0.2764					sigP:1^19^0.867^YES
NVE6292	75	107	81	102	77	2	14	81	106	77	106	74	2	14	65.66	88	90	8	0.089	-3.487	-6.443	1.16847e-10	1.39855e-09	0.1523	0.0806	0.0898	0.0898	TRUE	0.2078					sigP:1^21^0.631^YES
NVE12047	41	40	33	49	41	1	6	44	40	31	51	39	1	6	30.35	38	45	4	0.089	-3.486	-4.843	1.2815e-06	8.83215e-06	0.0115	0.1581	0.1176	0.1176	TRUE	0.134	fgenesh1_pg.scaffold_278000038	216955	NEMVEDRAFT_v1g216955				lipoxygenase 2 [Branchiostoma belcheri tsingtauense]	AOSL_PLEHO	Allene oxide synthase-lipoxygenase protein;		Arachidonate
NVE6690	339	516	314	348	349	46	27	365	511	297	363	336	44	27	277.46	391	350	36	0.09	-3.467	-11.176	5.34268e-29	2.91971e-27	0.0539	0.0297	0.038	0.038	TRUE	0.192	e_gw.177.42.1	121215	NEMVEDRAFT_v1g121215	*		Nv-ZicC	Zinc finger protein ZIC 1 [Calypte anna]	ZIC3_XENTR	Zinc finger protein ZIC 3 {ECO:0000250|UniProtKB:O57311};
NVE10935	235	242	155	218	152	9	30	253	239	147	227	146	9	30	150.19	213	186	20	0.09	-3.48	-8.022	1.03752e-15	2.07375e-14	0.1748	0.0431	0.076	0.076	TRUE	0.5492	fgenesh1_pg.scaffold_250000030	216157	NEMVEDRAFT_v1g216157				Fcn3-A protein [Xenopus laevis]	FBCD1_XENTR	Fibrinogen C domain-containing protein 1;		Ficolin (Collagen fibrinogen domain containing)
NVE7440	22	28	31	20	38	2	3	24	28	29	21	37	2	3	20.43	27	29	2	0.09	-3.469	-4.132	3.60225e-05	0.00019167	0	0.2281	0.1519	0.1519	TRUE	0.0438	fgenesh1_pg.scaffold_19000004	200012	NEMVEDRAFT_v1g200012		sigP:1^19^0.512^YES		lipoprotein receptor [Callinectes sapidus]	GP112_MOUSE		GPR126	G- protein-coupled receptor	GO:0000003,GO:0000902,GO:0000904,GO:0001508,GO:0003008,GO:0003674,GO:0004871,GO:0004872,GO:0004888,GO:0004930,GO:0005575,GO:0005622,GO:0005623,GO:0005737,GO:0005886,GO:0005887,GO:0007154,GO:0007165,GO:0007166,GO:0007186,GO:0007272,GO:0007275,GO:0007276,GO:0007283,GO:0007399,GO:0008150,GO:0008366,GO:0009653,GO:0009987,GO:0010001,GO:0016020,GO:0016021,GO:0016043,GO:0016324,GO:0019226,GO:0019228,GO:…
NVE18480	20	24	20	13	29	4	0	22	24	19	14	28	4	0	15.64	22	21	2	0.09	-3.471	-3.544	0.000394212	0.00167954	0.058	0.2937	0.2322	0.2322	TRUE	0.0405	e_gw.48.138.1	98238	NEMVEDRAFT_v1g98238	*		NvHD056/NK-like 18	GJ18853 [Drosophila virilis]	BARH1_DROME	Homeobox protein B-H1;	BARHL2	BarH-like homeobox	GO:0000003,GO:0000122,GO:0000981,GO:0000982,GO:0001071,GO:0001077,GO:0001228,GO:0001558,GO:0001654,GO:0001709,GO:0001745,GO:0001751,GO:0001754,GO:0001764,GO:0002165,GO:0003002,GO:0003006,GO:0003008,GO:0003674,GO:0003676,GO:0003677,GO:0003700,GO:0003705,GO:0005488,GO:0005575,GO:0005622,GO:0005623,GO:0005634,GO:0006139,GO:0006351,GO:0006355,GO:0006357,GO:0006366,GO:0006417,GO:0006725,GO:0006807,GO:…
NVE8916	10	13	9	11	9	2	0	11	13	9	11	9	2	0	7.74	11	10	1	0.09	-3.471	-2.626	0.00864083	0.0256636	0	0.5791	0.3663	0.3663	TRUE	0.0838					sigP:1^19^0.588^YES						GLI pathogenesis-related 2
NVE1974	1270	2004	1533	1425	1536	122	176	1369	1983	1451	1486	1477	116	175	1150.98	1601	1482	146	0.091	-3.462	-15.5	3.47229e-54	8.27662e-52	0.0381	0.0178	0.0245	0.0245	TRUE	0.351	e_gw.119.85.1	113654	NEMVEDRAFT_v1g113654		sigP:1^21^0.744^YES			XYLT_DROPS	Xylosyltransferase oxt;		WSC domain
NVE18954	4369	5784	3820	5408	5597	261	610	4709	5724	3615	5640	5383	248	607	3703.52	4683	5512	428	0.091	-3.455	-11.861	1.88869e-32	1.36509e-30	0.1123	0.0152	0.0475	0.0475	TRUE	0.0848					sigP:1^22^0.871^YES
NVE4054	268	292	222	303	185	15	34	289	289	210	316	178	14	34	189.98	263	247	24	0.091	-3.455	-9.106	8.57086e-20	2.42167e-18	0.1112	0.037	0.0571	0.0571	TRUE	0.2304	fgenesh1_pg.scaffold_141000061	211665	NEMVEDRAFT_v1g211665				major facilitator superfamily domain-containing protein 6 [Cricetulus griseus]	MFSD6_MOUSE	Major facilitator superfamily domain-containing protein 6;
NVE4964	95	99	78	154	109	4	13	102	98	74	161	105	4	13	79.47	91	133	8	0.091	-3.46	-6.945	3.78957e-12	5.24778e-11	0.0666	0.069	0.0684	0.0684	TRUE	0.1852	e_gw.153.115.1	118469	NEMVEDRAFT_v1g118469		sigP:1^20^0.811^YES		tolloid-like protein 2 precursor [Xenopus laevis]	VMP_NEMVE	Nematocyst expressed protein 6 {ECO:0000303|PubMed:23151943};	ASTL	astacin-like metalloendopeptidase (M12 family)	GO:0000003,GO:0001775,GO:0003674,GO:0003824,GO:0004175,GO:0004222,GO:0005575,GO:0005622,GO:0005623,GO:0005737,GO:0005886,GO:0006508,GO:0006810,GO:0006897,GO:0006909,GO:0007155,GO:0007275,GO:0007338,GO:0007343,GO:0008150,GO:0008152,GO:0008233,GO:0008237,GO:0009566,GO:0009893,GO:0009987,GO:0010468,GO:0010604,GO:0010954,GO:0016020,GO:0016021,GO:0016023,GO:0016192,GO:0016787,GO:0017090,GO:0019222,GO:…
NVE18951	1255	1598	1255	1464	1729	62	192	1353	1581	1188	1527	1663	59	191	1080.14	1374	1595	125	0.091	-3.46	-6.761	1.36986e-11	1.79702e-10	0.146	0.018	0.0563	0.146	TRUE	0.1206	estExt_fgenesh1_pg.C_50075	238341	NEMVEDRAFT_v1g238341		sigP:1^21^0.893^YES
NVE25921	9	10	13	15	13	1	1	10	10	12	16	13	1	1	8.86	11	14	1	0.091	-3.453	-2.716	0.00660331	0.0204384	0	0.508	0.2942	0.2942	TRUE	0.0484
NVE12074	11	10	11	9	14	1	1	12	10	10	9	13	1	1	8.14	11	11	1	0.091	-3.462	-2.689	0.00717107	0.0218993	0	0.5516	0.3185	0.3185	TRUE	0.0196							retinol dehydrogenase, retinaldehyde reductase [Branchiostoma floridae]	RDH7_MOUSE	Retinol dehydrogenase 7;		Dehydrogenase
NVE2361	120	165	178	139	164	10	19	129	163	168	145	158	10	19	113.16	153	152	14	0.092	-3.444	-9.052	1.40555e-19	3.89761e-18	0.0095	0.0526	0.0396	0.0396	TRUE	0.1321								HMCT_BOMMO	Hemocytin;		MAC/Perforin domain
NVE300	305	242	186	319	188	21	26	329	239	176	333	181	20	26	186.21	248	257	23	0.092	-3.438	-8.861	7.93139e-19	2.07122e-17	0.0989	0.0375	0.0597	0.0597	TRUE	0.1117	fgenesh1_pg.scaffold_10000050	198458	NEMVEDRAFT_v1g198458				peptidase C26 family protein [Dictyostelium discoideum AX4]	GGHA_DICDI	Gamma-glutamyl hydrolase A;	GGH	Gamma-glutamyl hydrolase (Conjugase, folylpolygammaglutamyl hydrolase)	GO:0000323,GO:0003674,GO:0003824,GO:0005575,GO:0005576,GO:0005615,GO:0005622,GO:0005623,GO:0005737,GO:0005764,GO:0005773,GO:0005829,GO:0006082,GO:0006520,GO:0006575,GO:0006725,GO:0006732,GO:0006760,GO:0006807,GO:0008150,GO:0008152,GO:0008233,GO:0008238,GO:0008242,GO:0009719,GO:0009725,GO:0009987,GO:0010033,GO:0010035,GO:0010038,GO:0010043,GO:0010243,GO:0016023,GO:0016787,GO:0019752,GO:0031410,GO:…
NVE9234	1014	1520	1417	1552	2143	119	131	1093	1504	1341	1618	2061	113	130	1122.97	1313	1840	122	0.093	-3.432	-16.578	1.00219e-61	3.80594e-59	0.0221	0.0179	0.0196	0.0196	TRUE	0.1624	e_gw.216.84.1,gw.216.69.1,e_gw.216.1.1	125072,17632,125015	NEMVEDRAFT_v1g125072,NEMVEDRAFT_v1g17632,NEMVEDRAFT_v1g125015				notch [Culex quinquefasciatus]	SVEP1_HUMAN	Sushi, von Willebrand factor type A, EGF and pentraxin domain-containing protein 1;		HYR domain
NVE6967	4226	4875	4366	5515	5889	231	621	4554	4824	4132	5751	5663	219	618	3680.35	4503	5707	418	0.093	-3.428	-11.606	3.82036e-31	2.44568e-29	0.1147	0.0152	0.0488	0.0488	TRUE	0.0424	fgenesh1_pg.scaffold_180000017	213625	NEMVEDRAFT_v1g213625		sigP:1^21^0.623^YES
NVE25815	1515	1792	1155	1819	1386	78	206	1633	1773	1093	1897	1333	74	205	1144	1500	1615	140	0.093	-3.427	-6.635	3.23913e-11	4.11896e-10	0.1494	0.0178	0.0587	0.1494	TRUE	0.4526					sigP:1^18^0.836^YES
NVE8017	505	557	306	516	275	18	69	544	551	290	538	264	17	69	324.76	462	401	43	0.093	-3.43	-4.676	2.92627e-06	1.90599e-05	0.2958	0.0274	0.1012	0.2958	TRUE	0.8266	estExt_fgenesh1_pg.C_20026	237852	NEMVEDRAFT_v1g237852
NVE14130	22	41	16	24	19	0	5	24	41	15	25	18	0	5	18.24	27	22	2	0.093	-3.432	-3.664	0.000248682	0.00111195	0.2503	0.2538	0.253	0.253	TRUE	0.1649
NVE2966	861	1274	578	976	780	91	85	928	1261	547	1018	750	86	85	667.81	912	884	86	0.094	-3.415	-11.14	8.0203e-29	4.30942e-27	0.095	0.0205	0.0469	0.0469	TRUE	0.0792							Chain A, Crystal Structure Of Thrombospondin-1 Tsr Domains 2 And 3	TSP1_BOVIN	Thrombospondin-1;		Thrombospondin type 1 domain
NVE22821	4	10	18	10	13	0	2	4	10	17	10	13	0	2	8.02	10	12	1	0.094	-3.418	-2.504	0.0122965	0.0346517	0.1862	0.5592	0.4406	0.4406	TRUE	0.1055	fgenesh1_pg.scaffold_7171000001	225035	NEMVEDRAFT_v1g225035							CHRD	K04657 chordin	GO:0001667,GO:0001947,GO:0002009,GO:0002376,GO:0002520,GO:0003002,GO:0003007,GO:0003143,GO:0005575,GO:0005576,GO:0006928,GO:0007275,GO:0007368,GO:0007369,GO:0007389,GO:0007423,GO:0007507,GO:0008150,GO:0009653,GO:0009790,GO:0009798,GO:0009799,GO:0009855,GO:0009887,GO:0009888,GO:0009948,GO:0009952,GO:0009953,GO:0009966,GO:0009968,GO:0009987,GO:0010159,GO:0010646,GO:0010648,GO:0016477,GO:0022603,GO:…
NVE7082	3460	3060	2081	3733	2578	192	370	3729	3028	1969	3893	2479	182	368	2235.59	2909	3186	275	0.095	-3.402	-7.226	4.98181e-13	7.55227e-12	0.1256	0.0159	0.0521	0.1256	TRUE	0.1303	estExt_fgenesh1_pg.C_1820034	245886	NEMVEDRAFT_v1g245886					BIR7B_XENLA	Baculoviral IAP repeat-containing protein 7-B;	BIRC3	Baculoviral IAP	GO:0000003,GO:0002682,GO:0002697,GO:0002831,GO:0003674,GO:0003824,GO:0004842,GO:0005575,GO:0005622,GO:0005623,GO:0005634,GO:0005737,GO:0006461,GO:0006464,GO:0007154,GO:0007165,GO:0007166,GO:0007276,GO:0007283,GO:0008150,GO:0008152,GO:0008219,GO:0009892,GO:0009966,GO:0009967,GO:0009987,GO:0010563,GO:0010627,GO:0010646,GO:0010647,GO:0010740,GO:0010939,GO:0010941,GO:0012501,GO:0016020,GO:0016043,GO:…
NVE20101	84	130	93	109	106	4	16	91	129	88	114	102	4	16	77.5	103	108	10	0.095	-3.389	-7.03	2.05818e-12	2.92056e-11	0.0701	0.0704	0.0704	0.0704	TRUE	0.3316	e_gw.55.165.1	100082	NEMVEDRAFT_v1g100082				PREDICTED: heparan sulfate 2-O-sulfotransferase pipe [Tribolium castaneum]	HS2ST_CRILO	Heparan sulfate 2-O-sulfotransferase 1;		Sulfotransferase family
NVE21414	905	1291	1010	1007	1079	69	140	975	1278	956	1050	1038	66	139	785.91	1070	1044	102	0.096	-3.388	-12.879	5.94748e-38	6.05724e-36	0.0729	0.0195	0.0338	0.0338	TRUE	0.2312	gw.62.157.1	50112	NEMVEDRAFT_v1g50112				aminopeptidase N [Pseudopleuronectes americanus]	AMPN_CHICK	Aminopeptidase Ey {ECO:0000303|PubMed:9734335};		Aminopeptidase
NVE1216	358	475	338	540	610	35	42	386	470	320	563	587	33	42	342.94	392	575	38	0.096	-3.387	-12.712	5.04738e-37	4.83297e-35	0.0205	0.0267	0.0243	0.0243	TRUE	0.1331	gw.11.151.1,e_gw.11.389.1	35615.9	NEMVEDRAFT_v1g35615,NEMVEDRAFT_v1g85345		sigP:1^22^0.911^YES		Ovochymase-1 [Crassostrea gigas]	OVCH1_HUMAN	Ovochymase-1;	MASP1	mannan-binding lectin serine peptidase 1 (C4 C2 activating component of Ra-reactive factor)	GO:0001867,GO:0002250,GO:0002252,GO:0002253,GO:0002376,GO:0002443,GO:0002449,GO:0002455,GO:0002460,GO:0002673,GO:0002682,GO:0002683,GO:0002684,GO:0002697,GO:0002698,GO:0002920,GO:0002921,GO:0003674,GO:0003824,GO:0004175,GO:0004252,GO:0005488,GO:0005509,GO:0005515,GO:0005575,GO:0005576,GO:0005615,GO:0006508,GO:0006950,GO:0006952,GO:0006955,GO:0006956,GO:0006958,GO:0006959,GO:0007275,GO:0007399,GO:…
NVE23675	919	924	692	1181	926	59	108	990	914	655	1232	891	56	107	692.19	853	1062	82	0.096	-3.386	-12.068	1.55612e-33	1.17623e-31	0.076	0.0203	0.0378	0.0378	TRUE	0.3293	estExt_fgenesh1_pg.C_780026	243050	NEMVEDRAFT_v1g243050		sigP:1^20^0.801^YES		glycosyl hydrolase family 5 [Clostridium butyricum]	GUNE_CLOTM			Cellulase (glycosyl hydrolase family 5)
NVE517	679	666	558	689	577	39	86	732	659	528	719	555	37	86	473.56	640	637	62	0.096	-3.387	-11.506	1.2297e-30	7.56944e-29	0.0829	0.0232	0.0398	0.0398	TRUE	0.1608	estExt_fgenesh1_pg.C_1010012	243877	NEMVEDRAFT_v1g243877				poly-gamma-glutamate synthesis protein precursor [Hydra vulgaris]	CAPA_BACAN	Capsule biosynthesis protein CapA;		PGA_cap
NVE19313	728	854	596	962	828	43	101	785	845	564	1003	796	41	100	590.65	731	900	70	0.096	-3.375	-11.042	2.40875e-28	1.25805e-26	0.1073	0.0214	0.045	0.045	TRUE	0.3173
NVE13073	71	95	92	90	86	6	11	77	94	87	94	83	6	11	64.4	86	88	8	0.096	-3.375	-7.144	9.08778e-13	1.33434e-11	0	0.0819	0.0536	0.0536	TRUE	0.0555							PREDICTED: major facilitator superfamily domain-containing protein 4 [Heterocephalus glaber]	MFSD4_XENTR	Major facilitator superfamily domain-containing protein 4;	MFSD4	Major facilitator superfamily domain containing 4	GO:0005575,GO:0016020
NVE9725	4375	6779	4000	4688	4610	291	697	4715	6709	3785	4889	4433	276	693	3643.01	5070	4661	484	0.096	-3.387	-6.95	3.65918e-12	5.07978e-11	0.1356	0.0152	0.0538	0.1356	TRUE	0.1969	e_gw.226.37.1	125997	NEMVEDRAFT_v1g125997		sigP:1^19^0.936^YES		fk506-binding protein [Aedes aegypti]	FKB14_PONAB	Peptidyl-prolyl cis-trans isomerase FKBP14;	FKBP14	FK506 binding protein 14, 22 kDa	GO:0000413,GO:0001932,GO:0001934,GO:0002118,GO:0002121,GO:0002165,GO:0003674,GO:0003755,GO:0003824,GO:0005488,GO:0005527,GO:0005528,GO:0005575,GO:0005576,GO:0005615,GO:0005622,GO:0005623,GO:0005737,GO:0005783,GO:0005788,GO:0006464,GO:0006950,GO:0006984,GO:0006986,GO:0006987,GO:0007154,GO:0007165,GO:0007275,GO:0007423,GO:0007444,GO:0007472,GO:0007476,GO:0007552,GO:0007560,GO:0007610,GO:0008144,GO:…
NVE7301	39	96	50	25	30	1	11	42	95	47	26	29	1	11	35.88	61	28	6	0.096	-3.384	-4.836	1.32289e-06	9.1006e-06	0.3254	0.1359	0.1767	0.1767	TRUE	1.3282	gw.187.57.1	55558	NEMVEDRAFT_v1g55558					GAPR1_HUMAN	Golgi-associated plant pathogenesis-related protein 1;		GLI pathogenesis-related 2	GO:0005575,GO:0005576
NVE6154	578	618	673	432	462	72	53	623	612	637	451	444	68	53	412.48	624	448	60	0.097	-3.363	-16.216	3.90971e-59	1.20001e-56	0	0.0246	0.0145	0.0145	TRUE	0.0027	estExt_fgenesh1_pg.C_170039	239609	NEMVEDRAFT_v1g239609		sigP:1^24^0.553^YES	pikachurin-like pikachurin-like	laminin gamma-3 chain, putative [Pediculus humanus corporis]	EGFLA_HUMAN	Pikachurin;	EGFLAM	EGF-like, fibronectin type III and laminin G domains	GO:0001654,GO:0001745,GO:0001751,GO:0001754,GO:0003674,GO:0005488,GO:0005539,GO:0005575,GO:0005576,GO:0005578,GO:0005604,GO:0005614,GO:0005615,GO:0006022,GO:0006029,GO:0006082,GO:0006464,GO:0006790,GO:0006807,GO:0006996,GO:0007275,GO:0007399,GO:0007423,GO:0008150,GO:0008152,GO:0009100,GO:0009653,GO:0009887,GO:0009987,GO:0010810,GO:0010811,GO:0016043,GO:0018149,GO:0018193,GO:0018209,GO:0019538,GO:…
NVE2913	303	391	253	378	270	28	35	327	387	239	394	260	27	35	238.31	318	327	31	0.097	-3.372	-10.351	4.13055e-25	1.71705e-23	0.0554	0.0323	0.0409	0.0409	TRUE	0.1175	e_gw.13.483.1	86403	NEMVEDRAFT_v1g86403				unknown [Medicago truncatula]	NOTUM_MOUSE	Palmitoleoyl-protein carboxylesterase NOTUM {ECO:0000250|UniProtKB:Q6P988};		notum pectinacetylesterase homolog (Drosophila)
NVE3605	210	250	199	188	185	16	28	226	247	188	196	178	15	28	154.15	220	187	22	0.097	-3.363	-10.201	1.95563e-24	7.75538e-23	0.0137	0.0424	0.0336	0.0336	TRUE	0.1226
NVE23343	100	125	107	125	100	6	16	108	124	101	130	96	6	16	82.98	111	113	11	0.097	-3.369	-7.585	3.32373e-14	5.73573e-13	0.0226	0.0667	0.0558	0.0558	TRUE	0.0683	fgenesh1_pg.scaffold_75000089	206995	NEMVEDRAFT_v1g206995				laminin [Streptomyces clavuligerus]
NVE902	82	106	83	67	108	3	15	88	105	79	70	104	3	15	66.19	91	87	9	0.097	-3.363	-6.487	8.73179e-11	1.05983e-09	0.1067	0.0801	0.0843	0.0843	TRUE	0.1228
NVE23501	51	97	62	67	81	10	4	55	96	59	70	78	10	4	52.98	70	74	7	0.097	-3.366	-6.095	1.09566e-09	1.16127e-08	0.0582	0.0965	0.0841	0.0841	TRUE	0.6449	fgenesh1_pg.scaffold_764000006	221430	NEMVEDRAFT_v1g221430				peritrophic membrane chitin binding protein 1 [Trichoplusia ni]	CPG2_CAEBR	Chondroitin proteoglycan 2;		chitin binding	GO:0003674,GO:0005198,GO:0016490
NVE12143	42	58	50	30	65	5	5	45	57	47	31	63	5	5	36.21	50	47	5	0.097	-3.363	-5.285	1.25977e-07	1.0117e-06	0	0.1348	0.1055	0.1055	TRUE	0.0917	fgenesh1_pg.scaffold_28000075	201458	NEMVEDRAFT_v1g201458		sigP:1^20^0.773^YES		Hemicentin-1 [Heterocephalus glaber]	HMCN1_HUMAN	Hemicentin-1;
NVE18595	30	10	19	25	32	3	1	32	10	18	26	31	3	1	17.27	20	28	2	0.097	-3.368	-3.449	0.000562603	0.00231722	0	0.2673	0.2287	0.2287	TRUE	0.209	e_gw.483.30.1	139655	NEMVEDRAFT_v1g139655					FA5_PSETE	Coagulation factor V;	F5	coagulation factor	GO:0001775,GO:0002576,GO:0003008,GO:0003013,GO:0005575,GO:0005576,GO:0005615,GO:0005622,GO:0005623,GO:0005737,GO:0005886,GO:0006810,GO:0006887,GO:0006950,GO:0007596,GO:0007599,GO:0008015,GO:0008150,GO:0009607,GO:0009611,GO:0009617,GO:0009987,GO:0016020,GO:0016023,GO:0016192,GO:0030141,GO:0030168,GO:0031091,GO:0031093,GO:0031410,GO:0031974,GO:0031982,GO:0031983,GO:0031988,GO:0032501,GO:0032940,GO:…
NVE3643	1852	2417	1821	2278	2528	142	265	1996	2392	1723	2376	2431	135	264	1616.63	2037	2404	200	0.098	-3.355	-13.755	4.73265e-43	6.38794e-41	0.0627	0.0167	0.0312	0.0312	TRUE	0.1312					sigP:1^17^0.939^YES
NVE548	465	593	375	694	612	38	59	501	587	355	724	589	36	59	407.14	481	656	48	0.098	-3.346	-11.615	3.4758e-31	2.23148e-29	0.0544	0.0247	0.0347	0.0347	TRUE	0.192	estExt_fgenesh1_pg.C_1010044	243898	NEMVEDRAFT_v1g243898
NVE26200	648	495	450	752	554	45	63	698	490	426	784	533	43	63	433.79	538	658	53	0.098	-3.353	-11.386	4.89629e-30	2.87943e-28	0.064	0.0241	0.0382	0.0382	TRUE	0.5022	fgenesh1_pg.scaffold_99000051	208976	NEMVEDRAFT_v1g208976					PDI_DATGL	Protein disulfide-isomerase;	PDIA4	Protein disulfide isomerase family A, member	GO:0000003,GO:0003674,GO:0003756,GO:0003824,GO:0005575,GO:0005622,GO:0005623,GO:0005737,GO:0005783,GO:0005788,GO:0006457,GO:0006810,GO:0006950,GO:0006984,GO:0006986,GO:0007154,GO:0007165,GO:0007275,GO:0008104,GO:0008150,GO:0008152,GO:0009306,GO:0009790,GO:0009792,GO:0009986,GO:0009987,GO:0010033,GO:0015031,GO:0016023,GO:0016853,GO:0016860,GO:0016862,GO:0016864,GO:0019538,GO:0023052,GO:0030968,GO:…
NVE6069	201	252	217	61	59	26	19	217	249	205	64	57	25	19	119.33	224	60	22	0.098	-3.357	-10.285	8.27326e-25	3.35816e-23	0	0.0506	0.0329	0.0329	TRUE	0.0739
NVE2178	194	236	182	210	176	15	26	209	234	172	219	169	14	26	149.03	205	194	20	0.098	-3.358	-9.679	3.69754e-22	1.26484e-20	0.0273	0.0433	0.0383	0.0383	TRUE	0.1215	fgenesh1_pg.scaffold_12000146	198923	NEMVEDRAFT_v1g198923		sigP:1^20^0.765^YES		Golgi-associated plant pathogenesis-related protein 1 [Esox lucius]	GAPR1_MOUSE	Golgi-associated plant pathogenesis-related protein 1;		GLI pathogenesis-related 2
NVE8948	138	238	130	241	159	14	20	149	236	123	251	153	13	20	134.96	169	202	16	0.098	-3.352	-7.956	1.77472e-15	3.48504e-14	0.0978	0.0464	0.0647	0.0647	TRUE	0.5345	estExt_fgenesh1_pg.C_210156	239918	NEMVEDRAFT_v1g239918
NVE10770	62	69	46	87	80	3	9	67	68	44	91	77	3	9	51.16	60	84	6	0.098	-3.345	-5.865	4.49242e-09	4.41479e-08	0.0344	0.0995	0.0811	0.0811	TRUE	0.3276							pentapeptide repeat-containing protein [uncultured marine thaumarchaeote SAT1000_09_B07]	RRBP1_HUMAN	Ribosome-binding protein 1;
NVE11525	74	74	75	49	18	3	12	80	73	71	51	17	3	12	43.88	75	34	8	0.098	-3.346	-5.351	8.73366e-08	7.17852e-07	0.2203	0.1137	0.1405	0.1405	TRUE	0.0213	gw.264.38.1	56135	NEMVEDRAFT_v1g56135				Lactadherin precursor-like protein [Camelus ferus]	MFGM_MOUSE	Lactadherin;		FA58C
NVE1042	15	7	7	14	9	2	0	16	7	7	15	9	2	0	7.84	10	12	1	0.098	-3.353	-2.461	0.0138622	0.0383028	0.1376	0.572	0.4254	0.4254	TRUE	0.6654	fgenesh1_pg.scaffold_107000042	209537	NEMVEDRAFT_v1g209537								chitin binding	GO:0003674,GO:0005198,GO:0016490
NVE20501	6411	7260	4547	8354	6750	502	745	6909	7185	4303	8712	6491	477	741	4974.04	6132	7602	609	0.099	-3.332	-13.393	6.66126e-41	8.20067e-39	0.0668	0.0149	0.0347	0.0347	TRUE	0.5542	e_gw.57.36.1	100407	NEMVEDRAFT_v1g100407				gamma-glutamyltransferase 1, isoform CRA_a [Rattus norvegicus]	GGT1_RAT	Gamma-glutamyltranspeptidase 1;		Gamma-glutamyltransferase
NVE7367	26	45	17	24	24	2	4	28	45	16	25	23	2	4	20.38	30	24	3	0.099	-3.336	-3.993	6.52427e-05	0.000329984	0	0.2287	0.1893	0.1893	TRUE	0.0949
NVE13068	7	17	21	14	15	1	2	8	17	20	15	14	1	2	10.89	15	14	2	0.099	-3.34	-3.004	0.00266308	0.00918832	0	0.4158	0.2866	0.2866	TRUE	0.4144	gw.30.144.1	36265	NEMVEDRAFT_v1g36265				Atrial natriuretic peptide receptor A [Acromyrmex echinatior]	GUC2G_RAT	Guanylate cyclase 2G;		CYCc
NVE20724	142	150	161	156	160	14	17	153	148	152	163	154	13	17	114.37	151	158	15	0.1	-3.327	-9.438	3.78282e-21	1.19042e-19	0	0.0522	0.0303	0.0303	TRUE	0.0019	gw.587.2.1	613	NEMVEDRAFT_v1g613				peptidase M1 membrane alanine aminopeptidase (trf2/trf3) [uncultured marine thaumarchaeote KM3_73_E02]	PSA_HUMAN	Puromycin-sensitive aminopeptidase;		Aminopeptidase
NVE24058	72	47	38	39	36	6	5	78	47	36	41	35	6	5	35.15	54	38	6	0.1	-3.317	-5.231	1.68744e-07	1.3327e-06	0	0.1384	0.1151	0.1151	TRUE	0.2925
NVE8451	11	7	11	8	4	1	1	12	7	10	8	4	1	1	6.19	10	6	1	0.1	-3.322	-2.428	0.0151849	0.0413557	0	0.7208	0.4381	0.4381	TRUE	0.1464	e_gw.2008.6.1	147470	NEMVEDRAFT_v1g147470				dynein cytoplasmic heavy polypeptide-like protein [Sus scrofa]	DYHC1_MOUSE	Cytoplasmic dynein 1 heavy chain 1;	DYNC1H1	dynein, cytoplasmic 1, heavy chain 1	GO:0000003,GO:0000086,GO:0000226,GO:0000278,GO:0000280,GO:0000775,GO:0000776,GO:0000902,GO:0000904,GO:0000910,GO:0000922,GO:0001654,GO:0001709,GO:0001738,GO:0001754,GO:0002009,GO:0002119,GO:0002164,GO:0002252,GO:0002376,GO:0002478,GO:0002495,GO:0002504,GO:0003002,GO:0003006,GO:0003008,GO:0003407,GO:0003674,GO:0003774,GO:0003777,GO:0003824,GO:0005575,GO:0005576,GO:0005622,GO:0005623,GO:0005634,GO:…
NVE4226	2238	2755	2247	2686	2859	210	292	2412	2726	2126	2801	2750	200	290	1900.76	2421	2776	245	0.101	-3.306	-17.527	8.96624e-69	6.27805e-66	0.0224	0.0163	0.018	0.018	TRUE	0.0864					sigP:1^19^0.847^YES						collagen, type IV, alpha	GO:0000003,GO:0001700,GO:0002009,GO:0003006,GO:0005575,GO:0005576,GO:0005578,GO:0005581,GO:0005587,GO:0005604,GO:0007275,GO:0007391,GO:0008150,GO:0009653,GO:0009790,GO:0009792,GO:0009887,GO:0009888,GO:0016331,GO:0022414,GO:0030935,GO:0031012,GO:0032501,GO:0032502,GO:0035239,GO:0035295,GO:0035848,GO:0044420,GO:0044421,GO:0044699,GO:0044707,GO:0044767,GO:0048513,GO:0048598,GO:0048608,GO:0048729,GO:…
NVE23050	1062	1783	1184	1187	1407	118	161	1145	1765	1120	1238	1353	112	160	984.68	1343	1296	136	0.101	-3.304	-13.663	1.67732e-42	2.22378e-40	0.0489	0.0184	0.0291	0.0291	TRUE	0.6041	fgenesh1_pg.scaffold_73000090	206795	NEMVEDRAFT_v1g206795		sigP:1^23^0.784^YES			HMCN1_HUMAN	Hemicentin-1;		Inherit from KOG: PTK7 protein tyrosine kinase 7
NVE20437	4276	4265	2993	4917	3978	285	515	4608	4221	2832	5128	3826	271	512	3056.83	3887	4477	392	0.101	-3.312	-12.342	5.37634e-35	4.54575e-33	0.0854	0.0154	0.0399	0.0399	TRUE	0.4575	fgenesh1_pg.scaffold_57000020	205168	NEMVEDRAFT_v1g205168		sigP:1^22^0.852^YES		discoidin, CUB and LCCL domain containing 2-like protein [Camelus ferus]	DCBD2_MOUSE	Discoidin, CUB and LCCL domain-containing protein 2;		FA58C
NVE9187	125	171	78	74	70	7	19	135	169	74	77	67	7	19	78.26	126	72	13	0.101	-3.308	-6.651	2.9049e-11	3.71078e-10	0.1483	0.0699	0.0935	0.0935	TRUE	0.1101								GAPR1_HUMAN	Golgi-associated plant pathogenesis-related protein 1;		GLI pathogenesis-related 2	GO:0005575,GO:0005576
NVE17329	14365	11696	10835	14591	13641	638	1917	15481	11575	10254	15216	13119	606	1906	9736.74	12437	14168	1256	0.101	-3.307	-6.268	3.65199e-10	4.14311e-09	0.16	0.0144	0.0628	0.16	TRUE	0.3738	fgsh_est.C_scaffold_43000004	232380	NEMVEDRAFT_v1g232380
NVE22142	1188	1312	1169	1631	1405	81	176	1280	1298	1106	1701	1351	77	175	998.44	1228	1526	126	0.102	-3.287	-12.287	1.06639e-34	8.81679e-33	0.0811	0.0184	0.0363	0.0363	TRUE	0.0606	estExt_fgenesh1_pg.C_680048	242644	NEMVEDRAFT_v1g242644		sigP:1^22^0.81^YES
NVE17691	96	116	90	99	100	1	20	103	115	85	103	96	1	20	74.81	101	100	10	0.102	-3.292	-5.943	2.79251e-09	2.81969e-08	0.4602	0.0725	0.1164	0.1164	TRUE	0.1271	estExt_fgenesh1_pg.C_440133	241404	NEMVEDRAFT_v1g241404
NVE4081	56	88	57	50	37	4	10	60	87	54	52	36	4	10	43.26	67	44	7	0.102	-3.297	-5.756	8.62353e-09	8.1321e-08	0.0603	0.1151	0.0978	0.0978	TRUE	0.4053					sigP:1^18^0.815^YES
NVE4320	19	23	15	6	9	2	2	20	23	14	6	9	2	2	10.89	19	8	2	0.102	-3.298	-3.309	0.000937177	0.00366464	0	0.4157	0.252	0.252	TRUE	0.1894
NVE22631	13	9	6	7	5	1	1	14	9	6	7	5	1	1	6.09	10	6	1	0.102	-3.288	-2.386	0.0170125	0.0456099	0	0.732	0.4525	0.4525	TRUE	0.1052
NVE14858	2820	2808	2345	2987	2961	169	393	3039	2779	2219	3115	2848	161	391	2078.75	2679	2982	276	0.103	-3.282	-11.701	1.26112e-31	8.46008e-30	0.0982	0.0161	0.0431	0.0431	TRUE	0.1826	estExt_fgenesh1_pg.C_350028	240821	NEMVEDRAFT_v1g240821		sigP:1^19^0.873^YES		AFR700Wp [Ashbya gossypii ATCC 10895]	PR1_HORVU	Pathogenesis-related protein 1;
NVE8356	208	177	149	222	124	11	27	224	175	141	232	119	10	27	132.63	180	176	18	0.103	-3.277	-7.579	3.49325e-14	5.98851e-13	0.141	0.047	0.0741	0.0741	TRUE	0.1115	fgenesh1_pg.scaffold_20000105	200267	NEMVEDRAFT_v1g200267
NVE773	917	961	726	1148	865	32	151	988	951	687	1197	832	30	150	690.85	875	1014	90	0.103	-3.278	-4.633	3.60962e-06	2.31408e-05	0.2818	0.0203	0.0902	0.2818	TRUE	0.2819
NVE22341	32	25	13	33	25	0	5	34	25	12	34	24	0	5	19.28	24	29	2	0.103	-3.278	-3.522	0.000428596	0.00181063	0.259	0.2409	0.2446	0.2446	TRUE	0.1163
NVE5472	12	9	7	13	7	1	1	13	9	7	14	7	1	1	7.24	10	10	1	0.103	-3.283	-2.45	0.0142717	0.039226	0	0.618	0.3922	0.3922	TRUE	0.1834							RNA-binding protein S4 [Rhodobacter capsulatus B6]
NVE5606	131	263	184	103	183	25	16	141	260	174	107	176	24	16	128.38	192	142	20	0.104	-3.272	-8.107	5.18045e-16	1.07079e-14	0.0882	0.0481	0.0625	0.0625	TRUE	0.2409	e_gw.161.9.1	119418	NEMVEDRAFT_v1g119418		sigP:1^18^0.692^YES		Acid trehalase-like protein 1 [Chelonia mydas]	ATHL1_HUMAN	Acid trehalase-like protein 1;	ATHL1	ATH1, acid trehalase-like 1 (yeast)	GO:0003674,GO:0003824,GO:0004553,GO:0004555,GO:0008150,GO:0008152,GO:0015927,GO:0016787,GO:0016798
NVE3358	44	90	62	34	53	8	6	47	89	59	35	51	8	6	42.17	65	43	7	0.104	-3.26	-5.686	1.29866e-08	1.2014e-07	0	0.1177	0.0975	0.0975	TRUE	0.2483	fgenesh1_pg.scaffold_133000055	211183	NEMVEDRAFT_v1g211183				Nucleolar protein 4 [Crassostrea gigas]	NOL4_HUMAN	Nucleolar protein 4;		Inherit from NOG: nucleolar protein 4
NVE14974	46	51	28	37	27	2	7	50	50	26	39	26	2	7	28.57	42	32	4	0.104	-3.26	-4.611	4.01096e-06	2.54949e-05	0.0987	0.1671	0.146	0.146	TRUE	0.5595
NVE11575	134	159	108	227	193	11	18	144	157	102	237	186	10	18	122.09	134	212	14	0.105	-3.252	-8.23	1.87416e-16	4.06509e-15	0.0377	0.0498	0.0457	0.0457	TRUE	0.3122	fgenesh1_pm.scaffold_266000001	230814	NEMVEDRAFT_v1g230814		sigP:1^22^0.834^YES		Gamma-glutamyl hydrolase precursor [Salmo salar]	GGHA_DICDI	Gamma-glutamyl hydrolase A;	GGH	Gamma-glutamyl hydrolase (Conjugase, folylpolygammaglutamyl hydrolase)	GO:0000323,GO:0003674,GO:0003824,GO:0005575,GO:0005576,GO:0005615,GO:0005622,GO:0005623,GO:0005737,GO:0005764,GO:0005773,GO:0005829,GO:0006082,GO:0006520,GO:0006575,GO:0006725,GO:0006732,GO:0006760,GO:0006807,GO:0008150,GO:0008152,GO:0008233,GO:0008238,GO:0008242,GO:0009719,GO:0009725,GO:0009987,GO:0010033,GO:0010035,GO:0010038,GO:0010043,GO:0010243,GO:0016023,GO:0016787,GO:0019752,GO:0031410,GO:…
NVE22513	480	398	268	435	285	22	61	517	394	254	454	274	21	61	282.01	388	364	41	0.105	-3.254	-8.116	4.82684e-16	1.00232e-14	0.1914	0.0295	0.0773	0.0773	TRUE	0.0773	e_gw.7.500.1	83526	NEMVEDRAFT_v1g83526				calmodulin [Chara corallina]	CALM3_PETHY	Calmodulin-related protein;	CAM	calmodulin	GO:0000003,GO:0000226,GO:0000278,GO:0003674,GO:0005488,GO:0005515,GO:0006810,GO:0006897,GO:0006898,GO:0006909,GO:0006915,GO:0006928,GO:0006996,GO:0007010,GO:0007017,GO:0007049,GO:0007051,GO:0007052,GO:0007163,GO:0007275,GO:0008104,GO:0008150,GO:0008219,GO:0009790,GO:0009792,GO:0009987,GO:0010941,GO:0012501,GO:0016043,GO:0016192,GO:0016265,GO:0016477,GO:0022402,GO:0030010,GO:0031503,GO:0032501,GO:…
NVE9236	404	453	434	552	674	44	50	435	448	411	576	648	42	50	372.83	431	612	46	0.106	-3.238	-14.3	2.18277e-46	3.59612e-44	0	0.0257	0.0159	0.0159	TRUE	0.0138	e_gw.216.18.1,fgenesh1_pg.scaffold_216000028	124999	NEMVEDRAFT_v1g124999,NEMVEDRAFT_v1g215021		sigP:1^19^0.789^YES		hypothetical protein AaeL_AAEL005982 [Aedes aegypti]	SCUB1_HUMAN	Signal peptide, CUB and EGF-like domain-containing protein 1;		Inherit from KOG: PTK7 protein tyrosine kinase 7
NVE14312	1165	1533	1055	1318	1300	89	184	1256	1517	998	1374	1250	85	183	951.9	1257	1312	134	0.106	-3.234	-11.744	7.60958e-32	5.23007e-30	0.0853	0.0186	0.039	0.039	TRUE	0.0721	estExt_fgenesh1_pg.C_330141	240765	NEMVEDRAFT_v1g240765		sigP:1^19^0.932^YES		8(R)-lipoxygenase [Plexaura homomalla]	LOXA_PSEAE	Arachidonate 15-lipoxygenase;		Lipoxygenase
NVE18354	1410	1334	1123	1518	1128	91	191	1520	1320	1063	1583	1085	86	190	978.11	1301	1334	138	0.106	-3.236	-11.208	3.74448e-29	2.08703e-27	0.0956	0.0184	0.0435	0.0435	TRUE	0.0992							Protein FAM186A [Cricetulus griseus]
NVE17854	84	131	61	70	54	5	15	91	130	58	73	52	5	15	60.36	93	62	10	0.106	-3.243	-5.954	2.6154e-09	2.64802e-08	0.1564	0.0865	0.1071	0.1071	TRUE	0.0673
NVE7300	49	93	52	47	30	3	11	53	92	49	49	29	3	11	40.82	65	39	7	0.106	-3.24	-5.21	1.88992e-07	1.48217e-06	0.1576	0.1212	0.1316	0.1316	TRUE	0.8097	fgenesh1_pg.scaffold_187000014	213913	NEMVEDRAFT_v1g213913					STAB2_HUMAN	Stabilin-2;
NVE23154	25	29	28	31	33	4	2	27	29	26	32	32	4	2	21.71	27	32	3	0.106	-3.234	-4.2	2.66609e-05	0.000145557	0	0.2155	0.1267	0.1267	TRUE	0.0077
NVE5067	47	13	49	5	9	4	4	51	13	46	5	9	4	4	18.79	37	7	4	0.106	-3.235	-3.831	0.000127799	0.000609639	0	0.2468	0.2502	0.2502	TRUE	1.3231	fgenesh1_pg.scaffold_155000021	212397	NEMVEDRAFT_v1g212397
NVE5857	3543	4387	2908	5333	5379	418	383	3818	4342	2752	5561	5173	397	381	3203.48	3637	5367	389	0.107	-3.225	-16.524	2.44757e-61	9.14003e-59	0.0241	0.0153	0.0203	0.0203	TRUE	0.2728	fgsh_est.C_scaffold_165000002	233260	NEMVEDRAFT_v1g233260		sigP:1^20^0.933^YES
NVE6110	643	782	588	1025	1156	81	67	693	774	556	1069	1112	77	67	621.08	674	1090	72	0.107	-3.23	-14.857	6.27543e-50	1.24431e-47	0.015	0.021	0.0185	0.0185	TRUE	0.1859	fgenesh1_pg.scaffold_17000006	199717	NEMVEDRAFT_v1g199717		sigP:1^16^0.87^YES		Carboxypeptidase A2 [Chaetura pelagica]	CBPA4_HUMAN	Carboxypeptidase A4;	CPB2	Carboxypeptidase	GO:0001990,GO:0001991,GO:0002002,GO:0003008,GO:0003013,GO:0003044,GO:0003073,GO:0003081,GO:0003674,GO:0003824,GO:0004180,GO:0004181,GO:0005488,GO:0005575,GO:0005576,GO:0005578,GO:0005615,GO:0005622,GO:0005623,GO:0005737,GO:0006325,GO:0006464,GO:0006473,GO:0006475,GO:0006508,GO:0006950,GO:0006996,GO:0007039,GO:0008015,GO:0008150,GO:0008152,GO:0008217,GO:0008233,GO:0008235,GO:0008237,GO:0008238,GO:…
NVE1205	494	662	603	564	669	54	75	532	655	571	588	643	51	75	445.09	586	616	63	0.107	-3.222	-14.323	1.56558e-46	2.5984e-44	0.0102	0.0238	0.0192	0.0192	TRUE	0.0832	estExt_fgenesh1_pg.C_110011	239007	NEMVEDRAFT_v1g239007
NVE22662	44	55	51	53	64	5	6	47	54	48	55	62	5	6	39.66	50	58	6	0.107	-3.226	-5.608	2.04413e-08	1.8313e-07	0	0.1243	0.0737	0.0737	TRUE	0.0322											MAC/Perforin domain
NVE24203	997	1117	898	1064	1180	78	146	1074	1105	850	1110	1135	74	145	784.78	1010	1122	110	0.108	-3.206	-12.999	1.23328e-38	1.32851e-36	0.0564	0.0195	0.0293	0.0293	TRUE	0.1538							alpha tubulin protein [Platynereis dumerilii]	TBA1_PARLI	Tubulin alpha-1 chain;	TUBA3D	Tubulin is the major constituent of microtubules. It binds two moles of GTP, one at an exchangeable site on the beta chain and one at a non-exchangeable site on the alpha chain (By similarity)	GO:0000075,GO:0000166,GO:0000226,GO:0000235,GO:0000278,GO:0001882,GO:0001883,GO:0001966,GO:0002376,GO:0003674,GO:0005198,GO:0005200,GO:0005488,GO:0005525,GO:0005575,GO:0005622,GO:0005623,GO:0005737,GO:0005813,GO:0005815,GO:0005818,GO:0005819,GO:0005856,GO:0005874,GO:0005876,GO:0005881,GO:0006457,GO:0006458,GO:0006955,GO:0006959,GO:0006996,GO:0007010,GO:0007017,GO:0007049,GO:0007051,GO:0007052,GO:…
NVE3354	285	369	288	484	601	38	32	307	365	273	505	578	36	32	299.36	315	542	34	0.108	-3.212	-12.075	1.43061e-33	1.09028e-31	0	0.0286	0.0224	0.0224	TRUE	0.1482	estExt_GenewiseH_1.C_1330117	189020	NEMVEDRAFT_v1g189020		sigP:1^17^0.819^YES		metalloproteinase 2 [Hydra vulgaris]	BP10_PARLI	Blastula protease 10;		astacin-like metalloendopeptidase (M12 family)
NVE7869	546	785	488	509	631	87	49	588	777	462	531	607	83	49	442.31	609	569	66	0.108	-3.21	-11.445	2.49438e-30	1.51461e-28	0.0597	0.0239	0.0358	0.0358	TRUE	0.1143	fgenesh1_pg.scaffold_197000025	214340	NEMVEDRAFT_v1g214340		sigP:1^20^0.785^YES			GAPR1_HUMAN	Golgi-associated plant pathogenesis-related protein 1;		GLI pathogenesis-related 2
NVE10079	56	62	43	60	49	3	9	60	61	41	63	47	3	9	40.56	54	55	6	0.108	-3.207	-5.39	7.04416e-08	5.8608e-07	0.0373	0.1218	0.0971	0.0971	TRUE	0.2712
NVE23347	31	50	40	43	66	5	4	33	49	38	45	63	5	4	33.97	40	54	4	0.108	-3.204	-4.951	7.38581e-07	5.28204e-06	0	0.1428	0.0981	0.0981	TRUE	0.2032
NVE12213	30	24	26	22	21	4	2	32	24	25	23	20	4	2	18.52	27	22	3	0.108	-3.207	-4.011	6.03349e-05	0.000307032	0	0.2502	0.153	0.153	TRUE	0.1259	gw.280.52.1	50144	NEMVEDRAFT_v1g50144		sigP:1^20^0.525^YES		Aminopeptidase N [Crassostrea gigas]	AMPE_HUMAN	Glutamyl aminopeptidase;
NVE9453	8	11	8	10	17	1	1	9	11	8	10	16	1	1	7.97	9	13	1	0.108	-3.215	-2.466	0.0136585	0.0378098	0	0.5628	0.3353	0.3353	TRUE	0.0716	fgenesh1_pg.scaffold_22000078	200556	NEMVEDRAFT_v1g200556				neuropeptide GPCR A24 [Nilaparvata lugens]	TLR2_DROME	Tachykinin-like peptides receptor 99D;		pyroglutamylated RFamide peptide receptor
NVE22433	292	348	259	244	216	21	46	315	344	245	254	208	20	46	204.58	301	231	33	0.109	-3.203	-9.806	1.05663e-22	3.746e-21	0.0623	0.0354	0.0423	0.0423	TRUE	0.2033	estExt_fgenesh1_pg.C_70087	238639	NEMVEDRAFT_v1g238639					GELA_DICDI	Gelation factor;
NVE22007	60	54	46	28	19	3	9	65	53	44	29	18	3	9	31.56	54	24	6	0.109	-3.199	-5.09	3.58523e-07	2.68574e-06	0.0407	0.1526	0.1208	0.1208	TRUE	0.0526	e_gw.67.33.1	103153	NEMVEDRAFT_v1g103153				neuronal acetylcholine receptor subunit alpha-10 precursor [Gallus gallus]	ACH10_CHICK	Neuronal acetylcholine receptor subunit alpha-10;	NACHRA7	Acetylcholine Receptor	GO:0000003,GO:0003008,GO:0003674,GO:0004889,GO:0005215,GO:0005216,GO:0005230,GO:0005231,GO:0005261,GO:0005488,GO:0005575,GO:0005623,GO:0005886,GO:0005887,GO:0005892,GO:0006810,GO:0006811,GO:0006812,GO:0007154,GO:0007267,GO:0007268,GO:0007610,GO:0007626,GO:0007630,GO:0007632,GO:0008150,GO:0008324,GO:0008344,GO:0009314,GO:0009416,GO:0009628,GO:0009987,GO:0015075,GO:0015267,GO:0015276,GO:0016020,GO:…
NVE5493	30	22	42	16	33	3	4	32	22	40	17	32	3	4	21.3	31	24	4	0.109	-3.2	-4.11	3.96214e-05	0.000209081	0	0.2194	0.1655	0.1655	TRUE	0.1003	gw.16.46.1	31418	NEMVEDRAFT_v1g31418				potassium voltage-gated channel subfamily H member 6 isoform 4 [Homo sapiens]	KCNH6_RAT	Potassium voltage-gated channel subfamily H member 6;	KCNH6	Potassium voltage-gated channel, subfamily H (Eag-related), member	GO:0003008,GO:0003674,GO:0005215,GO:0005216,GO:0005242,GO:0005244,GO:0005249,GO:0005261,GO:0005267,GO:0005575,GO:0005623,GO:0005886,GO:0005887,GO:0006461,GO:0006810,GO:0006811,GO:0006812,GO:0006813,GO:0007154,GO:0007267,GO:0007268,GO:0008150,GO:0008324,GO:0009987,GO:0015075,GO:0015077,GO:0015079,GO:0015267,GO:0015276,GO:0015672,GO:0016020,GO:0016021,GO:0016043,GO:0019226,GO:0022607,GO:0022803,GO:…
NVE16448	4886	7010	6116	5736	6017	422	919	5266	6937	5788	5982	5787	401	914	4439.17	5997	5884	658	0.11	-3.19	-12.049	1.96089e-33	1.47436e-31	0.0854	0.015	0.0395	0.0395	TRUE	0.153	e_gw.4.469.1	81540	NEMVEDRAFT_v1g81540					ARSI_HUMAN	Arylsulfatase I;		Arylsulfatase
NVE1559	1828	2545	1924	2174	2251	147	327	1970	2519	1821	2267	2165	140	325	1600.9	2103	2216	232	0.11	-3.179	-11.551	7.28424e-31	4.55896e-29	0.0924	0.0167	0.041	0.041	TRUE	0.2411	e_gw.112.3.1	112522	NEMVEDRAFT_v1g112522				RecName: Full=PC3-like endoprotease variant A; AltName: Full=SPC3; Flags: Precursor [Hydra vulgaris]	NECA_HYDVU	PC3-like endoprotease variant A;		Proprotein convertase P-domain
NVE13825	356	491	396	401	368	29	64	384	486	375	418	354	28	64	301.09	415	386	46	0.11	-3.19	-10.663	1.51615e-26	7.01876e-25	0.0652	0.0285	0.0378	0.0378	TRUE	0.1737	estExt_fgenesh1_pg.C_3190005	247589	NEMVEDRAFT_v1g247589		sigP:1^17^0.9^YES		dickkopf-3 related protein precursor [Hydra vulgaris]	DKK3_CHICK	Dickkopf-related protein 3;
NVE15125	15	26	12	17	17	1	3	16	26	11	18	16	1	3	13.04	18	17	2	0.11	-3.185	-3.214	0.00131127	0.00491637	0	0.3495	0.2447	0.2447	TRUE	0.1985
NVE17882	609	854	763	753	957	86	84	656	845	722	785	920	82	84	584.92	741	852	83	0.111	-3.166	-15.285	9.64707e-53	2.14012e-50	0.0115	0.0215	0.0171	0.0171	TRUE	0.1188	estExt_fgenesh1_pg.C_450079	241446	NEMVEDRAFT_v1g241446				Thymidine phosphorylase [Crassostrea gigas]	TYPH_MOUSE	Thymidine phosphorylase;	TYMP	Thymidine phosphorylase	GO:0000002,GO:0003674,GO:0003824,GO:0004645,GO:0005102,GO:0005161,GO:0005488,GO:0005515,GO:0005575,GO:0005622,GO:0005623,GO:0005737,GO:0005829,GO:0006139,GO:0006206,GO:0006213,GO:0006220,GO:0006259,GO:0006260,GO:0006725,GO:0006753,GO:0006793,GO:0006796,GO:0006807,GO:0006935,GO:0006996,GO:0007005,GO:0007275,GO:0008150,GO:0008152,GO:0008655,GO:0009032,GO:0009056,GO:0009058,GO:0009059,GO:0009112,GO:…
NVE19087	277	291	180	380	239	17	40	299	288	170	396	230	16	40	205.56	252	313	28	0.111	-3.177	-8.009	1.15235e-15	2.29303e-14	0.1419	0.0353	0.0682	0.0682	TRUE	0.6052	estExt_gwp.C_50489	158913	NEMVEDRAFT_v1g158913				BTB/POZ domain-containing protein 2 [Zootermopsis nevadensis]	BTBD2_HUMAN	BTB/POZ domain-containing protein 2;		BTB POZ domain containing
NVE19597	4234	4634	3409	4854	4247	349	592	4563	4586	3226	5062	4084	332	589	3205.97	4125	4573	460	0.112	-3.165	-13.154	1.60993e-39	1.82183e-37	0.0612	0.0153	0.032	0.032	TRUE	0.2953	gw.52.274.1	63846	NEMVEDRAFT_v1g63846				Glutathione peroxidase 3 [Crassostrea gigas]	GPX5_RAT	Epididymal secretory glutathione peroxidase;	GPX3	glutathione peroxidase	GO:0000302,GO:0003674,GO:0003824,GO:0004601,GO:0004602,GO:0005488,GO:0005515,GO:0005575,GO:0005576,GO:0005615,GO:0006461,GO:0006629,GO:0006950,GO:0006979,GO:0006982,GO:0008134,GO:0008150,GO:0008152,GO:0008430,GO:0009056,GO:0009987,GO:0010033,GO:0010035,GO:0016043,GO:0016209,GO:0016491,GO:0016684,GO:0022607,GO:0033194,GO:0033554,GO:0034599,GO:0034614,GO:0042221,GO:0042542,GO:0042743,GO:0042744,GO:…
NVE17870	888	971	832	1063	997	64	142	957	961	787	1109	959	61	141	710.67	902	1034	101	0.112	-3.161	-11.586	4.84342e-31	3.09179e-29	0.0816	0.0201	0.0367	0.0367	TRUE	0.0982	estExt_fgenesh1_pg.C_450069	241440	NEMVEDRAFT_v1g241440		sigP:1^25^0.75^YES		apextrin-like protein [Mytilus galloprovincialis]
NVE5271	862	1209	972	1088	1028	71	161	929	1196	920	1135	989	67	160	770.88	1015	1062	114	0.112	-3.16	-11.217	3.37552e-29	1.88608e-27	0.0916	0.0196	0.0402	0.0402	TRUE	0.1948
NVE5154	485	506	368	331	281	39	66	523	501	348	345	270	37	66	298.55	457	308	52	0.112	-3.157	-10.755	5.59152e-27	2.677e-25	0.0547	0.0286	0.0374	0.0374	TRUE	0.3388	estExt_gwp.C_1560160	170763	NEMVEDRAFT_v1g170763		sigP:1^20^0.853^YES		glycosyl-phosphatidylinositol-linked carbonic anhydrase [Carcinus maenas]	CAH2_RAT	Carbonic anhydrase 2;	CA14	Carbonic AnHydrase	GO:0003674,GO:0003824,GO:0004089,GO:0005575,GO:0005576,GO:0005623,GO:0005886,GO:0006810,GO:0006811,GO:0006820,GO:0008150,GO:0008152,GO:0015701,GO:0015711,GO:0016020,GO:0016021,GO:0016829,GO:0016835,GO:0016836,GO:0031224,GO:0031225,GO:0031226,GO:0044281,GO:0044425,GO:0044459,GO:0044464,GO:0044699,GO:0044710,GO:0044765,GO:0046658,GO:0051179,GO:0051234,GO:0071702,GO:0071944
NVE21072	10	26	30	25	34	1	4	11	26	28	26	33	1	4	18.37	22	30	2	0.112	-3.152	-3.502	0.000461704	0.00194125	0.1153	0.2521	0.2098	0.2098	TRUE	0.6887	e_gw.6.42.1	83002	NEMVEDRAFT_v1g83002				S-methylmethionine--homocysteine S-methyltransferase BHMT2 [Pongo abelii]	BHMT2_PONAB	S-methylmethionine--homocysteine S-methyltransferase BHMT2;	BHMT2	betaine-homocysteine S-methyltransferase	GO:0000096,GO:0000097,GO:0003674,GO:0003824,GO:0006082,GO:0006520,GO:0006555,GO:0006790,GO:0006807,GO:0008150,GO:0008152,GO:0008168,GO:0008172,GO:0008652,GO:0008757,GO:0008898,GO:0009058,GO:0009066,GO:0009067,GO:0009086,GO:0009987,GO:0016053,GO:0016740,GO:0016741,GO:0019752,GO:0032259,GO:0043436,GO:0044237,GO:0044238,GO:0044249,GO:0044272,GO:0044281,GO:0044283,GO:0044710,GO:0044711,GO:0046394,GO:…
NVE9332	3966	4291	2935	4185	3303	278	587	4274	4247	2778	4364	3177	264	584	2812.43	3766	3770	424	0.113	-3.152	-10.881	1.42563e-27	7.06696e-26	0.1078	0.0155	0.0469	0.0469	TRUE	0.4281	fgenesh1_pg.scaffold_218000033	215113	NEMVEDRAFT_v1g215113				RecName: Full=Peptidyl-prolyl cis-trans isomerase B; Short=PPIase B; AltName: Full=CYP-S1; AltName: Full=Cyclophilin B; AltName: Full=Rotamase B; AltName: Full=S-cyclophilin; Short=SCYLP; Flags: Precursor [Rattus norvegicus]	PPIB_RAT	Peptidyl-prolyl cis-trans isomerase B;	PPIB	PPIases accelerate the folding of proteins (By similarity)	GO:0000413,GO:0003674,GO:0003755,GO:0003824,GO:0005488,GO:0005515,GO:0005575,GO:0005622,GO:0005623,GO:0005737,GO:0005783,GO:0005788,GO:0006464,GO:0006810,GO:0008150,GO:0008152,GO:0009987,GO:0016023,GO:0016043,GO:0016853,GO:0016859,GO:0018193,GO:0018208,GO:0019538,GO:0030198,GO:0031410,GO:0031974,GO:0031982,GO:0031988,GO:0036211,GO:0042470,GO:0043062,GO:0043170,GO:0043226,GO:0043227,GO:0043229,GO:…
NVE22593	273	428	304	249	184	33	45	294	424	288	260	177	31	45	216.89	335	218	38	0.113	-3.141	-10.027	1.16152e-23	4.41102e-22	0.0503	0.0341	0.04	0.04	TRUE	0.4054					sigP:1^24^0.845^YES
NVE7526	218	343	214	332	433	23	37	235	339	203	346	416	22	37	228.31	259	381	30	0.113	-3.146	-9.579	9.82245e-22	3.24126e-20	0.0536	0.0331	0.0407	0.0407	TRUE	0.5525					sigP:1^18^0.774^YES		HyTSR1 protein [Hydra vulgaris]	COEA1_CHICK	Collagen alpha-1(XIV) chain;		von Willebrand factor type A domain
NVE14311	2107	3067	2326	2430	2966	223	359	2271	3035	2201	2534	2852	212	357	1923.23	2502	2693	284	0.114	-3.138	-13.863	1.06548e-43	1.46461e-41	0.0491	0.0162	0.0273	0.0273	TRUE	0.2806					sigP:1^17^0.8^YES						Collagen triple helix repeat (20 copies)
NVE16877	765	1111	1023	819	922	73	151	824	1099	968	854	887	69	150	693.19	964	870	110	0.114	-3.137	-11.85	2.1487e-32	1.54803e-30	0.0722	0.0203	0.0347	0.0347	TRUE	0.0717	estExt_fgenesh1_pg.C_410115	241205	NEMVEDRAFT_v1g241205		sigP:1^24^0.62^YES
NVE16791	171	197	155	259	219	20	21	184	195	147	270	211	19	21	149.5	175	240	20	0.114	-3.136	-9.36	8.00624e-21	2.454e-19	0	0.0432	0.0332	0.0332	TRUE	0.1485	e_gw.41.147.1	96020	NEMVEDRAFT_v1g96020				proteinase [Riptortus pedestris]	CYSP1_HOMAM	Digestive cysteine proteinase 1;		Cathepsin propeptide inhibitor domain (I29)
NVE15836	295	367	263	330	282	18	54	318	363	249	344	271	17	54	230.88	310	308	36	0.114	-3.136	-8.713	2.96686e-18	7.38617e-17	0.1306	0.0329	0.0568	0.0568	TRUE	0.1265	fgenesh1_pg.scaffold_38000085	202855	NEMVEDRAFT_v1g202855		sigP:1^30^0.792^YES
NVE25207	222	407	171	146	171	36	27	239	403	162	152	164	34	27	168.8	268	158	30	0.114	-3.132	-8.102	5.39041e-16	1.11316e-14	0.1097	0.0399	0.0656	0.0656	TRUE	0.1486
NVE8182	126	96	83	127	76	4	20	136	95	79	132	73	4	20	76.94	103	102	12	0.114	-3.13	-5.85	4.90514e-09	4.79305e-08	0.2439	0.0708	0.1116	0.1116	TRUE	0.2756
NVE1599	10	19	23	10	14	1	3	11	19	22	10	13	1	3	11.31	17	12	2	0.114	-3.136	-3.102	0.00192387	0.00691469	0	0.4008	0.2673	0.2673	TRUE	0.2946
NVE5428	22	17	12	19	9	0	4	24	17	11	20	9	0	4	12.05	17	14	2	0.114	-3.137	-2.946	0.00321655	0.0108588	0.2027	0.3771	0.333	0.333	TRUE	0.0856
NVE5210	368	487	400	419	457	41	58	397	482	379	437	439	39	58	318.6	419	438	48	0.115	-3.119	-12.606	1.96112e-36	1.83087e-34	0.0117	0.0277	0.0223	0.0223	TRUE	0.1334	fgenesh1_pg.scaffold_157000035	212516	NEMVEDRAFT_v1g212516				TPA: hypoxia-inducible factor prolyl 4-hydroxylase [Bos taurus]	P4HTM_HUMAN	Transmembrane prolyl 4-hydroxylase;	P4HTM	Prolyl 4-hydroxylase, transmembrane (Endoplasmic reticulum)	GO:0005575,GO:0005622,GO:0005623,GO:0005737,GO:0005783,GO:0005789,GO:0012505,GO:0016020,GO:0031090,GO:0042175,GO:0043226,GO:0043227,GO:0043229,GO:0043231,GO:0044422,GO:0044424,GO:0044425,GO:0044432,GO:0044444,GO:0044446,GO:0044464
NVE718	259	320	257	321	320	23	43	279	317	243	335	308	22	43	220.88	280	322	32	0.115	-3.119	-10.541	5.56093e-26	2.46242e-24	0.0221	0.0338	0.0309	0.0309	TRUE	0.0832	fgenesh1_pg.scaffold_103000042	209267	NEMVEDRAFT_v1g209267				CD63 antigen [Crassostrea gigas]	CD151_BOVIN	CD151 antigen;		Cd63 molecule	GO:0005575,GO:0016020,GO:0016021,GO:0031224,GO:0044425
NVE19825	282	348	238	284	267	29	40	304	344	225	296	257	28	40	213.4	291	276	34	0.115	-3.115	-10.369	3.42866e-25	1.43863e-23	0.0312	0.0345	0.0333	0.0333	TRUE	0.1796	fgenesh1_pg.scaffold_53000127	204788	NEMVEDRAFT_v1g204788				major facilitator superfamily domain-containing protein 6 [Cricetulus griseus]	MFSD6_HUMAN	Major facilitator superfamily domain-containing protein 6;		major facilitator superfamily domain containing 6
NVE3410	113	106	98	117	83	9	16	122	105	93	122	80	9	16	77.96	107	101	12	0.115	-3.126	-7.152	8.55686e-13	1.26384e-11	0.0354	0.0701	0.0585	0.0585	TRUE	0.1024	fgenesh1_pg.scaffold_134000028	211237	NEMVEDRAFT_v1g211237		sigP:1^21^0.759^YES			NRP2_HUMAN	Neuropilin-2;
NVE20933	674	829	719	773	794	61	116	726	820	680	806	764	58	115	567.18	742	785	86	0.116	-3.102	-12.583	2.61077e-36	2.41723e-34	0.0437	0.0217	0.0277	0.0277	TRUE	0.0669	estExt_GenewiseH_1.C_60140	178276	NEMVEDRAFT_v1g178276				Major Facilitator Superfamily protein [Brugia malayi]	VGLU3_DANRE	Vesicular glutamate transporter 3;	SLC17A8	solute carrier family 17	GO:0001504,GO:0001505,GO:0003001,GO:0003008,GO:0003333,GO:0003674,GO:0005215,GO:0005310,GO:0005313,GO:0005316,GO:0005326,GO:0005342,GO:0005436,GO:0005575,GO:0005622,GO:0005623,GO:0005737,GO:0005768,GO:0005769,GO:0005783,GO:0005886,GO:0006810,GO:0006811,GO:0006812,GO:0006814,GO:0006817,GO:0006820,GO:0006835,GO:0006836,GO:0006865,GO:0007154,GO:0007267,GO:0007268,GO:0007269,GO:0007270,GO:0007600,GO:…
NVE19041	1462	1674	1083	1957	1732	118	219	1576	1657	1025	2041	1666	112	218	1184.8	1419	1854	165	0.116	-3.106	-11.316	1.0913e-29	6.26965e-28	0.0819	0.0177	0.0396	0.0396	TRUE	0.4749	e_gw.5.561.1	82364	NEMVEDRAFT_v1g82364					LEG_HELCR	D-galactoside-specific lectin;		protein Hydra magnipapillata
NVE6866	56	74	45	62	94	6	8	60	73	43	65	90	6	8	49.27	59	78	7	0.116	-3.107	-5.651	1.59873e-08	1.45852e-07	0	0.1028	0.0818	0.0818	TRUE	0.1418
NVE19229	15	20	15	25	16	2	2	16	20	14	26	15	2	2	13.64	17	20	2	0.116	-3.104	-3.221	0.00127592	0.00479346	0	0.3346	0.2113	0.2113	TRUE	0.0861	fgenesh1_pg.scaffold_50000089	204405	NEMVEDRAFT_v1g204405
NVE8325	250	495	175	370	315	37	37	269	490	166	386	303	35	37	240.81	308	344	36	0.117	-3.099	-7.817	5.42977e-15	1.01467e-13	0.1494	0.0321	0.0731	0.0731	TRUE	0.2297
NVE16498	202	261	453	329	196	21	51	218	258	429	343	188	20	51	215.28	302	266	36	0.117	-3.098	-7.526	5.23576e-14	8.82711e-13	0.1874	0.0343	0.0798	0.0798	TRUE	0.6261								CADN_ACRMI	Coadhesin {ECO:0000303|PubMed:23765379};	HMCN1	G2F domain
NVE5356	65	74	85	37	72	11	7	70	73	80	39	69	10	7	49.85	74	54	8	0.117	-3.095	-6.068	1.29128e-09	1.35413e-08	0	0.1017	0.0778	0.0778	TRUE	0.0295							coagulation factor V precursor [Gallus gallus]	FA5_BOVIN	Coagulation factor V;		Inherit from opiNOG: F5/8 type C domain
NVE6432	13	13	11	9	14	3	0	14	13	10	9	13	3	0	9	12	11	2	0.117	-3.101	-2.684	0.00727448	0.0221577	0	0.5002	0.3342	0.3342	TRUE	0.0573
NVE2180	885	1285	1046	938	1106	83	175	954	1272	990	978	1064	79	174	787.15	1072	1021	126	0.118	-3.086	-11.422	3.25321e-30	1.94897e-28	0.0797	0.0195	0.0371	0.0371	TRUE	0.2125	fgenesh1_pg.scaffold_12000147	198924	NEMVEDRAFT_v1g198924					PGCB_BOVIN	Brevican core protein;		Lectin C-type domain
NVE21165	211	217	209	196	225	30	22	227	215	198	204	216	29	22	158.73	213	210	26	0.118	-3.079	-10.414	2.13163e-25	9.0457e-24	0	0.0415	0.0254	0.0254	TRUE	0.03	fgenesh1_pg.scaffold_60000089	205566	NEMVEDRAFT_v1g205566				8(R)-lipoxygenase [Plexaura homomalla]	LOX5_RAT	Arachidonate 5-lipoxygenase;		Lipoxygenase
NVE19371	134	151	122	214	145	8	25	144	149	115	223	139	8	25	114.91	136	181	16	0.118	-3.079	-7.228	4.90659e-13	7.44327e-12	0.1109	0.052	0.0655	0.0655	TRUE	0.1269								PGCA_HUMAN	Aggrecan core protein;
NVE19910	205	260	90	277	186	11	34	221	257	85	289	179	10	34	153.63	188	234	22	0.118	-3.089	-6.175	6.63243e-10	7.23144e-09	0.291	0.0424	0.1157	0.1157	TRUE	0.6642							Protein DEL-4 [Caenorhabditis elegans]	ASI1A_DANRE	Acid-sensing ion channel 1;	ASIC4	acid-sensing (proton-gated) ion channel	GO:0001101,GO:0001976,GO:0003008,GO:0003013,GO:0003025,GO:0003026,GO:0003073,GO:0003674,GO:0005215,GO:0005216,GO:0005244,GO:0005248,GO:0005261,GO:0005272,GO:0005488,GO:0005515,GO:0005575,GO:0005622,GO:0005623,GO:0005737,GO:0005886,GO:0005887,GO:0006810,GO:0006811,GO:0006812,GO:0006814,GO:0006816,GO:0006820,GO:0006873,GO:0006875,GO:0006879,GO:0006897,GO:0006909,GO:0006911,GO:0006950,GO:0007154,GO:…
NVE23788	864	1522	1213	1069	1394	72	216	931	1506	1148	1115	1341	68	215	903.42	1195	1228	142	0.118	-3.078	-5.715	1.09856e-08	1.02517e-07	0.1628	0.0188	0.0632	0.1628	TRUE	0.1446	estExt_fgenesh1_pg.C_790006	243076	NEMVEDRAFT_v1g243076		sigP:1^20^0.853^YES
NVE22873	21	30	10	23	27	3	2	23	30	9	24	26	3	2	16.65	21	25	2	0.118	-3.083	-3.375	0.000737524	0.00296093	0	0.2767	0.221	0.221	TRUE	0.211	estExt_gwp.C_720086	166322	NEMVEDRAFT_v1g166322
NVE5454	15	21	13	9	14	2	2	16	21	12	9	13	2	2	10.86	16	11	2	0.118	-3.077	-3.071	0.00213362	0.00757862	0	0.417	0.2544	0.2544	TRUE	0.0789
NVE11307	225	255	193	313	525	25	30	242	252	183	326	505	24	30	223.2	226	416	27	0.119	-3.076	-9.498	2.12965e-21	6.82646e-20	0.0423	0.0336	0.0369	0.0369	TRUE	0.2085	estExt_fgenesh1_pg.C_260099	240246	NEMVEDRAFT_v1g240246
NVE23222	484	886	499	632	1016	46	106	522	877	472	659	977	44	105	522.28	624	818	74	0.119	-3.066	-8.777	1.67761e-18	4.26659e-17	0.1586	0.0224	0.0619	0.0619	TRUE	0.9922	gw.741.1.1	6868	NEMVEDRAFT_v1g6868					FUCL1_ANGJA	Fucolectin-1;		F5/8 type C domain
NVE15528	385	464	331	502	337	26	70	415	459	313	524	324	25	70	304.18	396	424	48	0.119	-3.073	-8.568	1.04944e-17	2.49351e-16	0.1452	0.0284	0.0607	0.0607	TRUE	0.2573	e_gw.37.232.1	94679	NEMVEDRAFT_v1g94679				Cathepsin L [Camponotus floridanus]	CATL_SARPE	Cathepsin L;		counting factor associated protein D-like	GO:0003674,GO:0003824,GO:0004175,GO:0004197,GO:0005575,GO:0005622,GO:0005623,GO:0005737,GO:0005811,GO:0005856,GO:0005875,GO:0008150,GO:0008152,GO:0008233,GO:0008234,GO:0015630,GO:0016787,GO:0032991,GO:0043226,GO:0043228,GO:0043229,GO:0043232,GO:0043234,GO:0044422,GO:0044424,GO:0044430,GO:0044444,GO:0044446,GO:0044464,GO:0070011
NVE11952	36	82	54	30	54	10	4	39	81	51	31	52	10	4	38.25	57	42	7	0.119	-3.075	-4.99	6.04121e-07	4.39193e-06	0.1208	0.1283	0.1258	0.1258	TRUE	0.2207	fgenesh1_pg.scaffold_274000020	216856	NEMVEDRAFT_v1g216856		sigP:1^22^0.865^YES		heparinase [Bacillus circulans]	CABC2_BACT4	Chondroitin sulfate ABC exolyase {ECO:0000303|PubMed:18512954, ECO:0000312|EMBL:ABV21364.1};		Lyase, catalytic
NVE19448	15	24	10	19	28	0	4	16	24	9	20	27	0	4	14.3	16	24	2	0.119	-3.069	-3.015	0.00257253	0.00891434	0.136	0.3199	0.2754	0.2754	TRUE	0.1132	fgenesh1_pg.scaffold_5113000001	224590	NEMVEDRAFT_v1g224590
NVE20992	496	680	442	357	400	91	44	535	673	418	372	385	86	44	359	542	378	65	0.12	-3.054	-10.479	1.07667e-25	4.67517e-24	0.0712	0.0262	0.0393	0.0393	TRUE	0.0688	fgenesh1_pg.scaffold_6000119	197606	NEMVEDRAFT_v1g197606				Rhombotin-1 [Harpegnathos saltator]	LMO3_RAT	LIM domain only protein 3;	LMO3	LIM domain only	GO:0000122,GO:0005575,GO:0005622,GO:0005623,GO:0005634,GO:0006355,GO:0006357,GO:0008150,GO:0009889,GO:0009890,GO:0009891,GO:0009892,GO:0009893,GO:0010468,GO:0010556,GO:0010557,GO:0010558,GO:0010604,GO:0010605,GO:0010628,GO:0010629,GO:0019219,GO:0019222,GO:0031323,GO:0031324,GO:0031325,GO:0031326,GO:0031327,GO:0031328,GO:0043226,GO:0043227,GO:0043229,GO:0043231,GO:0044424,GO:0044464,GO:0045892,GO:…
NVE12554	317	424	319	430	350	20	67	342	420	302	448	337	19	67	276.25	355	392	43	0.12	-3.054	-8.31	9.55044e-17	2.13347e-15	0.164	0.0298	0.0631	0.0631	TRUE	0.1983	fgenesh1_pg.scaffold_29000109	201627	NEMVEDRAFT_v1g201627		sigP:1^16^0.486^YES
NVE24451	10	20	19	15	51	2	2	11	20	18	16	49	2	2	16.73	16	32	2	0.12	-3.061	-3.077	0.00209301	0.0074521	0	0.2754	0.2458	0.2458	TRUE	0.2569								FBP1_STRPU	Fibropellin-1;
NVE19502	126	151	118	100	92	14	19	136	149	112	104	88	13	19	88.84	132	96	16	0.121	-3.041	-8.008	1.16141e-15	2.30901e-14	0	0.0632	0.0438	0.0438	TRUE	0.1305	e_gw.519.5.1	140371	NEMVEDRAFT_v1g140371				PREDICTED: aquaporin-4 isoform X1 [Mus musculus]	AQP4_MOUSE	Aquaporin-4;	AQP4	Aquaporin 4	GO:0000003,GO:0002376,GO:0003008,GO:0003014,GO:0003091,GO:0003097,GO:0003674,GO:0005215,GO:0005372,GO:0005575,GO:0005622,GO:0005623,GO:0005737,GO:0005886,GO:0005887,GO:0005911,GO:0006461,GO:0006810,GO:0006833,GO:0006950,GO:0006952,GO:0006955,GO:0006970,GO:0006972,GO:0007275,GO:0007399,GO:0007565,GO:0007588,GO:0007600,GO:0007605,GO:0008150,GO:0009314,GO:0009628,GO:0009651,GO:0009719,GO:0009725,GO:…
NVE24678	61	56	38	57	45	5	8	66	55	36	59	43	5	8	38.94	52	51	6	0.121	-3.046	-5.174	2.29465e-07	1.77228e-06	0	0.1263	0.1	0.1	TRUE	0.1827	gw.846.1.1	438	NEMVEDRAFT_v1g438				Angiotensin-converting enzyme [Dicentrarchus labrax]	ACE_CHICK	Angiotensin-converting enzyme;	ACE	Angiotensin I converting enzyme peptidyl-dipeptidase A	GO:0003674,GO:0003824,GO:0005575,GO:0008150,GO:0008152,GO:0008233,GO:0008237,GO:0008238,GO:0008241,GO:0016020,GO:0016787,GO:0070011
NVE8511	28	33	23	24	20	3	4	30	33	22	25	19	3	4	19.38	28	22	4	0.121	-3.048	-3.995	6.46896e-05	0.000327482	0	0.2397	0.1502	0.1502	TRUE	0.1795	gw.202.53.1	18606	NEMVEDRAFT_v1g18606		sigP:1^20^0.655^YES			MFGM_PIG	Lactadherin;		Milk fat globule-EGF factor 8 protein
NVE22155	366	563	405	349	415	42	69	394	557	383	364	399	40	69	315.21	445	382	54	0.122	-3.039	-10.903	1.11711e-27	5.59956e-26	0.0439	0.0279	0.0331	0.0331	TRUE	0.3769	fgenesh1_pg.scaffold_68000061	206332	NEMVEDRAFT_v1g206332
NVE12609	1052	1268	981	1337	1153	124	155	1134	1255	928	1394	1109	118	154	870.3	1106	1252	136	0.123	-3.024	-14.338	1.27202e-46	2.12694e-44	0.0241	0.019	0.021	0.021	TRUE	0.1579	e_gw.291.42.1	131215	NEMVEDRAFT_v1g131215					KREM1_HUMAN	Kremen protein 1;		WSC domain
NVE12857	944	2438	1432	948	2102	256	151	1017	2413	1355	989	2021	243	150	1169.83	1595	1505	196	0.123	-3.019	-5.248	1.54024e-07	1.22118e-06	0.1877	0.0177	0.0691	0.1877	TRUE	0.3866	e_gw.3.433.1	80945	NEMVEDRAFT_v1g80945		sigP:1^23^0.765^YES		fibrillar collagen [Hydra vulgaris]	CO1A2_CANFA			Collagen triple helix repeat (20 copies)
NVE4440	650	780	689	727	722	88	93	701	772	652	758	694	84	92	536.15	708	726	88	0.124	-3.008	-15.572	1.12575e-54	2.77181e-52	0	0.0221	0.0143	0.0143	TRUE	0.0492	estExt_fgenesh1_pg.C_1470045	245150	NEMVEDRAFT_v1g245150		sigP:1^19^0.794^YES
NVE19040	8874	10452	8602	10225	11195	832	1539	9564	10344	8141	10663	10766	791	1530	7399.74	9350	10714	1160	0.124	-3.01	-12.985	1.49779e-38	1.59807e-36	0.0574	0.0146	0.0304	0.0304	TRUE	0.1042	estExt_fgenesh1_pg.C_50168	238392	NEMVEDRAFT_v1g238392		sigP:1^21^0.896^YES
NVE9377	514	859	609	612	848	81	87	554	850	576	638	816	77	87	513.94	660	727	82	0.124	-3.014	-12.013	3.03313e-33	2.27292e-31	0.0379	0.0225	0.0286	0.0286	TRUE	0.499					sigP:1^20^0.593^YES			TENX_HUMAN	Tenascin-X;	TNC	tenascin C
NVE314	590	892	582	757	590	69	106	636	883	551	789	567	66	105	513.89	690	678	86	0.124	-3.014	-10.864	1.7083e-27	8.43086e-26	0.064	0.0225	0.037	0.037	TRUE	0.3536	e_gw.10.66.1	85050	NEMVEDRAFT_v1g85050				solute carrier family 24 (sodium/potassium/calcium exchanger), member 4, isoform CRA_a [Mus musculus]	NCKX5_HUMAN	Sodium/potassium/calcium exchanger 5;	SLC24A5	Solute carrier family 24 (Sodium potassium calcium exchanger), member	GO:0002065,GO:0003674,GO:0005215,GO:0005575,GO:0005622,GO:0005623,GO:0005737,GO:0005886,GO:0006810,GO:0006811,GO:0006812,GO:0006813,GO:0006814,GO:0006816,GO:0008150,GO:0008273,GO:0008324,GO:0009888,GO:0009987,GO:0012505,GO:0015075,GO:0015077,GO:0015079,GO:0015081,GO:0015085,GO:0015291,GO:0015297,GO:0015298,GO:0015368,GO:0015491,GO:0015672,GO:0016020,GO:0016021,GO:0016023,GO:0022804,GO:0022821,GO:…
NVE19321	679	843	444	891	675	59	109	732	834	420	929	649	56	108	532.71	662	789	82	0.124	-3.011	-9.229	2.72038e-20	8.02012e-19	0.1198	0.0222	0.0536	0.0536	TRUE	0.4456	e_gw.508.74.1	140260	NEMVEDRAFT_v1g140260		sigP:1^23^0.769^YES		similar to hedgehog protein [Cyanidioschyzon merolae strain 10D]	DHHB_XENLA	Desert hedgehog protein B;	DHH	Intercellular signal essential for a variety of patterning events during development (By similarity)	GO:0000003,GO:0000122,GO:0000578,GO:0000902,GO:0000904,GO:0001501,GO:0001503,GO:0001508,GO:0001525,GO:0001568,GO:0001569,GO:0001570,GO:0001649,GO:0001654,GO:0001655,GO:0001656,GO:0001657,GO:0001658,GO:0001666,GO:0001667,GO:0001701,GO:0001708,GO:0001745,GO:0001746,GO:0001751,GO:0001752,GO:0001754,GO:0001755,GO:0001756,GO:0001763,GO:0001775,GO:0001822,GO:0001838,GO:0001839,GO:0001840,GO:0001841,GO:…
NVE2965	189	272	109	201	166	27	22	204	269	103	210	160	26	22	141.83	192	185	24	0.124	-3.012	-7.269	3.61585e-13	5.57199e-12	0.1204	0.0448	0.0724	0.0724	TRUE	0.1245	gw.13.343.1	62660	NEMVEDRAFT_v1g62660		sigP:1^16^0.888^YES		Meprin A subunit beta [Crassostrea gigas]	MEP1B_RAT	Meprin A subunit beta;	MEP1A	Meprin A, alpha (PABA peptide hydrolase)	GO:0003674,GO:0003824,GO:0004175,GO:0004222,GO:0005575,GO:0005576,GO:0005615,GO:0005623,GO:0005886,GO:0005887,GO:0006508,GO:0007586,GO:0008150,GO:0008152,GO:0008233,GO:0008237,GO:0016020,GO:0016021,GO:0016787,GO:0017090,GO:0019538,GO:0022603,GO:0031224,GO:0031226,GO:0032501,GO:0032991,GO:0043170,GO:0043234,GO:0044238,GO:0044421,GO:0044425,GO:0044459,GO:0044464,GO:0044699,GO:0044707,GO:0045765,GO:…
NVE23149	75	79	70	100	121	3	16	81	78	66	104	116	3	16	66.38	75	110	10	0.124	-3.013	-6.043	1.51194e-09	1.57054e-08	0.0022	0.0799	0.0752	0.0752	TRUE	0.0664					sigP:1^21^0.868^YES
NVE7634	10	71	2	19	4	1	6	11	70	2	20	4	1	6	16.22	28	12	4	0.124	-3.006	-2.395	0.0166275	0.0447301	1.4577	0.2838	0.7243	0.7243	TRUE	1.0139	fgenesh1_pg.scaffold_1912000001	222763	NEMVEDRAFT_v1g222763				protein containing DUF885 [Flavobacterium saliperosum]				Bacterial protein of unknown function (DUF885)
NVE11003	144	169	104	159	102	13	23	155	167	98	166	98	12	23	102.86	140	132	18	0.125	-2.997	-7.03	2.06598e-12	2.92977e-11	0.0925	0.0565	0.0687	0.0687	TRUE	0.4799					sigP:1^23^0.887^YES
NVE16289	484	668	620	734	1064	82	71	522	661	587	765	1023	78	71	529.52	590	894	74	0.126	-2.989	-13.284	2.85177e-40	3.34538e-38	0.0185	0.0222	0.0207	0.0207	TRUE	0.0874	fgenesh1_pm.scaffold_4000002,estExt_fgenesh1_pg.C_40009	227960	NEMVEDRAFT_v1g227960,NEMVEDRAFT_v1g238138				Transmembrane protease, serine 11E [Cricetulus griseus]	CPP1_ACRMI	CUB and peptidase domain-containing protein 1 {ECO:0000303|PubMed:23765379};		Tryp_SPc
NVE9376	649	1053	674	946	932	99	106	699	1042	638	987	896	94	105	637.38	793	942	100	0.126	-2.992	-12.351	4.8235e-35	4.09376e-33	0.0377	0.0208	0.0275	0.0275	TRUE	0.5978	e_gw.219.82.1,gw.219.51.1	125484	NEMVEDRAFT_v1g125484,NEMVEDRAFT_v1g40426				N [Drosophila yakuba]	NOTCH_DROME	Neurogenic locus Notch protein;		Notch ligand involved in the mediation of Notch signaling (By similarity)	GO:0005575,GO:0016020
NVE10252	110	213	153	176	191	18	23	119	211	145	184	184	17	23	125.9	158	184	20	0.126	-2.987	-8.056	7.87438e-16	1.59668e-14	0.0454	0.0487	0.0475	0.0475	TRUE	0.3195	e_gw.237.128.1	127428	NEMVEDRAFT_v1g127428
NVE4489	139	193	120	143	130	11	28	150	191	114	149	125	10	28	109.54	152	137	19	0.126	-2.99	-7.316	2.56169e-13	4.00539e-12	0.0882	0.0539	0.063	0.063	TRUE	0.0777
NVE3597	78	131	77	79	135	14	11	84	130	73	82	130	13	11	74.72	96	106	12	0.127	-2.977	-6.396	1.59508e-10	1.87412e-09	0.0721	0.0725	0.0726	0.0726	TRUE	0.6356	e_gw.137.17.1	116296	NEMVEDRAFT_v1g116296					MINP1_HUMAN	Multiple inositol polyphosphate phosphatase 1;		Pfam:Acid_phosphat_A
NVE17213	2183	2680	1855	2356	2055	215	376	2353	2652	1756	2457	1976	204	374	1681.69	2254	2216	289	0.128	-2.963	-11.773	5.36463e-32	3.73292e-30	0.0671	0.0166	0.0343	0.0343	TRUE	0.1893					sigP:1^20^0.86^YES
NVE7766	120	122	87	142	119	9	20	129	121	82	148	114	9	20	89.05	111	131	14	0.128	-2.967	-6.909	4.87488e-12	6.67236e-11	0.0575	0.0631	0.0615	0.0615	TRUE	0.3428	fgenesh1_pg.scaffold_195000015	214234	NEMVEDRAFT_v1g214234				Protein mab-21-like 2-B [Crassostrea gigas]	MAB21_ANOGA	Protein mab-21;		Smith-Magenis syndrome chromosome region, candidate 7-like
NVE13282	191	208	100	292	201	10	34	206	206	95	305	193	10	34	149.64	169	249	22	0.128	-2.967	-6.318	2.65127e-10	3.05264e-09	0.2404	0.0432	0.0977	0.0977	TRUE	1.0627	estExt_fgenesh1_pg.C_3020021	247433	NEMVEDRAFT_v1g247433				Protein BM-NPR-10 [Brugia malayi]
NVE3796	45	47	21	80	76	2	8	48	47	20	83	73	2	8	40.18	38	78	5	0.128	-2.967	-4.411	1.02858e-05	6.06436e-05	0.1506	0.1229	0.1309	0.1309	TRUE	0.9057	fgenesh1_pg.scaffold_14000031	199266	NEMVEDRAFT_v1g199266		sigP:1^24^0.764^YES
NVE5155	18	17	22	40	45	3	2	19	17	21	42	43	3	2	20.98	19	42	2	0.128	-2.97	-3.591	0.000329409	0.00142706	0	0.2225	0.133	0.133	TRUE	0.0365	e_gw.156.14.1	118835	NEMVEDRAFT_v1g118835				Carbonic anhydrase 2 [Schistosoma haematobium]	CAH_ACRMI	Putative carbonic anhydrase {ECO:0000303|PubMed:23765379};		Carbonic anhydrase IV
NVE6288	472	561	531	494	503	45	93	509	555	503	515	484	43	92	385.79	522	500	68	0.129	-2.953	-11.179	5.14527e-29	2.8187e-27	0.0474	0.0253	0.0308	0.0308	TRUE	0.0239	gw.170.13.1	13490	NEMVEDRAFT_v1g13490				galactose-3-O-sulfotransferase 3 [Mus musculus]	G3ST3_MOUSE	Galactose-3-O-sulfotransferase 3;		Galactose-3-O-sulfotransferase
NVE11308	259	359	254	506	652	28	49	279	355	240	528	627	27	49	300.69	291	578	38	0.129	-2.957	-10.048	9.38536e-24	3.58854e-22	0.0437	0.0285	0.033	0.033	TRUE	0.2759	estExt_fgenesh1_pg.C_260099	240246	NEMVEDRAFT_v1g240246				Chain A, Crystal Structure Of The Gain And Hormr Domains Of Brain Angiogenesis Inhibitor 3 (bai3)	BAI3_HUMAN
NVE17626	54	76	74	67	77	7	11	58	75	70	70	74	7	11	52.14	68	72	9	0.129	-2.953	-6.109	1.00127e-09	1.06526e-08	0	0.0979	0.0623	0.0623	TRUE	0.0884							CG32984 [Drosophila melanogaster]				Protein of unknown function (DUF229)
NVE24811	33	31	26	20	37	2	6	36	31	25	21	36	2	6	22.17	31	28	4	0.129	-2.953	-3.976	6.99643e-05	0.00035204	0.0381	0.2113	0.1554	0.1554	TRUE	0.1039	fgenesh1_pg.scaffold_86000031	207940	NEMVEDRAFT_v1g207940								Serpentine type 7TM GPCR chemoreceptor Srv	GO:0005575,GO:0005623,GO:0005886,GO:0016020,GO:0044464,GO:0071944
NVE16464	2407	3150	2280	3110	2869	254	446	2594	3117	2158	3243	2759	241	444	2079.48	2623	3001	342	0.13	-2.938	-12.149	5.81115e-34	4.52099e-32	0.0617	0.0161	0.0319	0.0319	TRUE	0.099	e_gw.4.514.1	81453	NEMVEDRAFT_v1g81453		sigP:1^22^0.777^YES		zinc metalloproteinase, putative [Pediculus humanus corporis]	VMP_NEMVE	Nematocyst expressed protein 6 {ECO:0000303|PubMed:23151943};		astacin-like metalloendopeptidase (M12 family)	GO:0003674,GO:0003824,GO:0004175,GO:0004222,GO:0005575,GO:0006810,GO:0006897,GO:0006909,GO:0008150,GO:0008152,GO:0008233,GO:0008237,GO:0016020,GO:0016021,GO:0016192,GO:0016787,GO:0017090,GO:0031224,GO:0032991,GO:0043234,GO:0044425,GO:0044699,GO:0044765,GO:0051179,GO:0051234,GO:0070011
NVE11746	489	591	432	598	568	47	88	527	585	409	624	546	45	88	403.25	507	585	66	0.13	-2.942	-10.702	9.99463e-27	4.69475e-25	0.0553	0.0248	0.0339	0.0339	TRUE	0.2245	estExt_fgenesh1_pg.C_270073	240316	NEMVEDRAFT_v1g240316				probable protein BTN1 [Fusarium fujikuroi IMI 58289]	BTN1_YARLI	Protein BTN1;	CLN3	ceroid-lipofuscinosis, neuronal 3	GO:0000046,GO:0000139,GO:0000323,GO:0001505,GO:0001508,GO:0001575,GO:0003008,GO:0003674,GO:0005488,GO:0005515,GO:0005575,GO:0005622,GO:0005623,GO:0005634,GO:0005737,GO:0005739,GO:0005764,GO:0005765,GO:0005768,GO:0005769,GO:0005770,GO:0005773,GO:0005774,GO:0005776,GO:0005783,GO:0005789,GO:0005794,GO:0005795,GO:0005802,GO:0005886,GO:0005901,GO:0006066,GO:0006082,GO:0006457,GO:0006520,GO:0006576,GO:…
NVE16652	744	1265	1018	1086	1285	78	188	802	1252	963	1133	1236	74	187	806.64	1006	1184	130	0.13	-2.948	-9.684	3.50949e-22	1.20235e-20	0.1203	0.0194	0.0485	0.0485	TRUE	0.1835								TYR3_CAEEL	Putative tyrosinase-like protein tyr-3;		to astacin family metalloendopeptidase FARM-1 Hydra magnipapillata
NVE17896	46	66	33	50	75	8	5	50	65	31	52	72	8	5	40.42	49	62	6	0.13	-2.948	-4.934	8.05281e-07	5.73343e-06	0	0.1222	0.1051	0.1051	TRUE	0.1075	fgenesh1_pg.scaffold_45000102	203803	NEMVEDRAFT_v1g203803
NVE12679	42	66	14	54	24	4	7	45	65	13	56	23	4	7	30.57	41	40	6	0.13	-2.942	-3.75	0.000177041	0.000819752	0.3724	0.1571	0.2364	0.2364	TRUE	0.1341
NVE12553	597	782	549	717	729	63	110	643	774	520	748	701	60	109	507.84	646	724	84	0.131	-2.934	-11.227	3.01134e-29	1.6868e-27	0.055	0.0226	0.0318	0.0318	TRUE	0.0819	fgenesh1_pg.scaffold_29000109	201627	NEMVEDRAFT_v1g201627
NVE25786	208	172	137	122	129	24	23	224	170	130	127	124	23	23	117.29	175	126	23	0.131	-2.933	-8.231	1.85482e-16	4.02705e-15	0.0365	0.0513	0.0454	0.0454	TRUE	0.0827					sigP:1^28^0.757^YES
NVE23198	132	160	133	147	166	10	28	142	158	126	153	160	10	28	110.96	142	156	19	0.131	-2.936	-7.671	1.7076e-14	3.04137e-13	0.0308	0.0534	0.0502	0.0502	TRUE	0.0711	estExt_fgenesh1_pg.C_740075	242891	NEMVEDRAFT_v1g242891				CHST4 protein [Homo sapiens]	CHST3_HUMAN	Carbohydrate sulfotransferase 3;	CHST4	carbohydrate (N-acetylglucosamine 6-O) sulfotransferase	GO:0000139,GO:0001517,GO:0002376,GO:0003674,GO:0003824,GO:0005575,GO:0005622,GO:0005623,GO:0005737,GO:0005794,GO:0005802,GO:0006040,GO:0006044,GO:0006464,GO:0006477,GO:0006790,GO:0006928,GO:0006955,GO:0007154,GO:0007155,GO:0007159,GO:0007267,GO:0008146,GO:0008150,GO:0008152,GO:0009987,GO:0012505,GO:0016020,GO:0016337,GO:0016477,GO:0016740,GO:0016782,GO:0019538,GO:0022610,GO:0023052,GO:0031090,GO:…
NVE21136	67	55	55	64	61	5	11	72	54	52	67	59	5	11	45.68	59	63	8	0.131	-2.931	-5.569	2.56687e-08	2.27235e-07	0.01	0.1097	0.0782	0.0782	TRUE	0.192	fgenesh1_pg.scaffold_60000045	205522	NEMVEDRAFT_v1g205522				metabotropic glutamate receptor 6 precursor [Oryctolagus cuniculus]	CASR_RAT	Extracellular calcium-sensing receptor;	GRM3	glutamate receptor, metabotropic	GO:0001640,GO:0001641,GO:0003008,GO:0003674,GO:0004871,GO:0004872,GO:0004888,GO:0004930,GO:0005246,GO:0005488,GO:0005496,GO:0005575,GO:0005622,GO:0005623,GO:0005856,GO:0005886,GO:0005887,GO:0006140,GO:0007154,GO:0007165,GO:0007166,GO:0007186,GO:0007187,GO:0007188,GO:0007193,GO:0007194,GO:0007196,GO:0007215,GO:0007216,GO:0007267,GO:0007268,GO:0007270,GO:0007275,GO:0007517,GO:0007519,GO:0007528,GO:…
NVE17693	704	658	432	730	544	55	109	759	651	409	761	523	52	108	466.26	606	642	80	0.132	-2.918	-8.929	4.30749e-19	1.15034e-17	0.1137	0.0234	0.0536	0.0536	TRUE	0.2461	fgsh_est.C_scaffold_44000016	232409	NEMVEDRAFT_v1g232409				dead box-containing ATP-dependent RNA helicase [Naegleria gruberi]
NVE19959	18	33	15	13	14	4	2	19	33	14	14	13	4	2	14.15	22	14	3	0.132	-2.925	-3.328	0.000876203	0.00345273	0	0.3231	0.2267	0.2267	TRUE	0.2308	fgenesh1_pg.scaffold_54000053	204856	NEMVEDRAFT_v1g204856				14-3-3 protein [Populus tremula x Populus alba]	1433_TOBAC	14-3-3-like protein;	14-3-3ZETA	Tyrosine 3-monooxygenase tryptophan 5-monooxygenase activation protein	GO:0000003,GO:0000226,GO:0000278,GO:0001654,GO:0001709,GO:0001745,GO:0001751,GO:0001754,GO:0001932,GO:0001933,GO:0003006,GO:0003008,GO:0003674,GO:0004857,GO:0004860,GO:0005488,GO:0005515,GO:0005575,GO:0005576,GO:0005622,GO:0005623,GO:0005634,GO:0005737,GO:0005856,GO:0005875,GO:0006082,GO:0006457,GO:0006469,GO:0006520,GO:0006568,GO:0006576,GO:0006586,GO:0006587,GO:0006588,GO:0006725,GO:0006807,GO:…
NVE16412	878	1107	838	699	713	104	154	946	1096	793	729	686	99	153	643.06	945	708	126	0.133	-2.909	-12.972	1.77243e-38	1.87326e-36	0.0311	0.0208	0.0239	0.0239	TRUE	0.0593	estExt_fgenesh1_pg.C_40138	238222	NEMVEDRAFT_v1g238222				Transforming protein RhoA [Pteropus alecto]	GPX1_RAT	Glutathione peroxidase 1;	GPX3	glutathione peroxidase	GO:0000302,GO:0003674,GO:0003824,GO:0004601,GO:0004602,GO:0005488,GO:0005515,GO:0005575,GO:0005576,GO:0005615,GO:0006461,GO:0006629,GO:0006950,GO:0006979,GO:0006982,GO:0008134,GO:0008150,GO:0008152,GO:0008430,GO:0009056,GO:0009987,GO:0010033,GO:0010035,GO:0016043,GO:0016209,GO:0016491,GO:0016684,GO:0022607,GO:0033194,GO:0033554,GO:0034599,GO:0034614,GO:0042221,GO:0042542,GO:0042743,GO:0042744,GO:…
NVE26059	1894	3241	3490	2327	2958	318	459	2041	3207	3303	2427	2845	302	456	2083.06	2850	2636	379	0.133	-2.91	-12.278	1.19115e-34	9.81212e-33	0.0524	0.0161	0.0307	0.0307	TRUE	0.4985	e_gw.98.68.1	110159	NEMVEDRAFT_v1g110159				Hemicentin-1 [Crassostrea gigas]	SSPO_RAT	SCO-spondin;	HMCN1	G2F domain
NVE11531	156	207	104	226	178	18	25	168	205	98	236	171	17	25	131.46	157	204	21	0.133	-2.906	-7.278	3.38939e-13	5.23381e-12	0.0871	0.0473	0.0615	0.0615	TRUE	0.2233	fgenesh1_pm.scaffold_265000001	230810	NEMVEDRAFT_v1g230810	*		fez	zinc finger protein Gfi-1b [Rattus norvegicus]	FEZF2_XENLA	Fez family zinc finger protein 2;	FEZF1	fez family zinc finger	GO:0000122,GO:0000902,GO:0000904,GO:0000975,GO:0000976,GO:0000977,GO:0000978,GO:0000987,GO:0001012,GO:0001067,GO:0001159,GO:0001764,GO:0003002,GO:0003674,GO:0003676,GO:0003677,GO:0005488,GO:0005575,GO:0005622,GO:0005623,GO:0005634,GO:0006355,GO:0006357,GO:0006928,GO:0006935,GO:0007275,GO:0007389,GO:0007399,GO:0007409,GO:0007411,GO:0007417,GO:0007420,GO:0008150,GO:0008285,GO:0009605,GO:0009653,GO:…
NVE13167	43	53	46	43	48	6	7	46	52	44	45	46	6	7	35.14	47	46	6	0.133	-2.908	-5.176	2.2625e-07	1.74866e-06	0	0.1385	0.0812	0.0812	TRUE	0.0462	e_gw.30.12.1	92596	NEMVEDRAFT_v1g92596				Peptidase M20 domain-containing protein 2 [Crassostrea gigas]	P20D2_HUMAN	Peptidase M20 domain-containing protein 2;		peptidase M20 domain containing 2
NVE6017	12	10	11	7	6	0	3	13	10	10	7	6	0	3	7.04	11	6	2	0.133	-2.912	-2.392	0.0167343	0.0449793	0	0.6352	0.4211	0.4211	TRUE	0.0503	estExt_fgenesh1_pg.C_1680039	245597	NEMVEDRAFT_v1g245597
NVE5499	49	85	62	50	74	11	7	53	84	59	52	71	10	7	48.05	65	62	8	0.134	-2.902	-5.627	1.834e-08	1.65429e-07	0	0.105	0.0804	0.0804	TRUE	0.3811							D-beta-hydroxybutyrate dehydrogenase, mitochondrial [Crassostrea gigas]	RDH2_RAT	Retinol dehydrogenase 2;		Dehydrogenase
NVE18801	39	65	95	66	98	6	12	42	64	90	69	94	6	12	53.85	65	82	9	0.134	-2.901	-5.372	7.802e-08	6.44677e-07	0.0963	0.0952	0.0956	0.0956	TRUE	0.1013
NVE1250	29	19	16	8	12	3	3	31	19	15	8	12	3	3	12.99	22	10	3	0.135	-2.894	-3.27	0.00107401	0.00412411	0	0.3508	0.2328	0.2328	TRUE	0.3539
NVE13897	36	16	22	4	3	5	2	39	16	21	4	3	5	2	12.75	25	4	4	0.135	-2.89	-3.233	0.00122535	0.00462287	0	0.3571	0.2723	0.2723	TRUE	0.2648
NVE1151	896	1189	993	1104	1205	162	125	966	1177	940	1151	1159	154	124	810.06	1028	1155	139	0.136	-2.884	-15.429	1.03738e-53	2.37179e-51	0.0101	0.0194	0.0156	0.0156	TRUE	0.1291	fgenesh1_pg.scaffold_109000021	209643	NEMVEDRAFT_v1g209643		sigP:1^16^0.817^YES			FBLN2_HUMAN	Fibulin-2;		Inherit from KOG: PTK7 protein tyrosine kinase 7
NVE13105	1291	1888	1154	1843	1722	189	215	1391	1868	1092	1922	1656	180	214	1189.04	1450	1789	197	0.136	-2.883	-12.576	2.84637e-36	2.62452e-34	0.0396	0.0177	0.0271	0.0271	TRUE	0.1609	estExt_fgenesh1_pg.C_300081	240477	NEMVEDRAFT_v1g240477		sigP:1^19^0.823^YES		SJCHGC09417 protein [Schistosoma japonicum]	GAPR1_HUMAN	Golgi-associated plant pathogenesis-related protein 1;		GLI pathogenesis-related 2	GO:0005575,GO:0005576
NVE14933	669	644	493	678	587	62	107	721	637	467	707	565	59	106	465.96	608	636	82	0.136	-2.881	-10.45	1.46026e-25	6.27995e-24	0.0622	0.0234	0.0361	0.0361	TRUE	0.2088	estExt_fgenesh1_pm.C_350013	234521	NEMVEDRAFT_v1g234521				tubulin alpha chain [Riptortus pedestris]	TBA1C_HUMAN	Tubulin alpha-1C chain;
NVE1028	163	186	111	197	153	11	32	176	184	105	205	147	10	32	122.81	155	176	21	0.136	-2.879	-6.727	1.73333e-11	2.25403e-10	0.1494	0.0496	0.0753	0.0753	TRUE	0.5656				*			activating transcription factor 3 [Gadus morhua]	ATF2_MOUSE	Cyclic AMP-dependent transcription factor ATF-2;		Activating transcription factor 3	GO:0002376,GO:0003674,GO:0003676,GO:0003677,GO:0005488,GO:0005515,GO:0005575,GO:0005622,GO:0005623,GO:0005634,GO:0006955,GO:0007275,GO:0007399,GO:0008150,GO:0032501,GO:0032502,GO:0042592,GO:0043226,GO:0043227,GO:0043229,GO:0043231,GO:0043565,GO:0044424,GO:0044464,GO:0044699,GO:0044707,GO:0046983,GO:0048731,GO:0048856,GO:0048878,GO:0050896,GO:0055088,GO:0065007,GO:0065008,GO:0097159,GO:1901363
NVE25193	83	78	73	96	118	14	8	89	77	69	100	113	13	8	67.23	78	106	10	0.136	-2.879	-6.526	6.737e-11	8.29391e-10	0	0.079	0.0524	0.0524	TRUE	0.0882
NVE15517	2145	2528	2337	2172	2235	208	448	2312	2502	2212	2265	2149	198	446	1726.11	2342	2207	322	0.137	-2.865	-11.147	7.38101e-29	3.98503e-27	0.0745	0.0165	0.0361	0.0361	TRUE	0.0289	estExt_gwp.C_370207	163167	NEMVEDRAFT_v1g163167				gamma-glutamyltransferase 1 [Xenopus laevis]	GGT1_RAT	Gamma-glutamyltranspeptidase 1;		Gamma-glutamyltransferase
NVE25172	74	51	66	68	68	7	11	80	50	62	71	65	7	11	49.51	64	68	9	0.137	-2.871	-5.714	1.10112e-08	1.02713e-07	0	0.1023	0.0728	0.0728	TRUE	0.1241	fgenesh1_pg.scaffold_896000002	221657	NEMVEDRAFT_v1g221657
NVE12997	29	30	48	35	50	6	4	31	30	45	36	48	6	4	28.66	35	42	5	0.137	-2.872	-4.413	1.02046e-05	6.02808e-05	0	0.1666	0.1126	0.1126	TRUE	0.2994
NVE8636	30	48	39	16	27	6	5	32	48	37	17	26	6	5	24.3	39	22	6	0.137	-2.866	-4.382	1.17779e-05	6.85799e-05	0	0.194	0.1272	0.1272	TRUE	0.1856							neuropeptide receptor A33 [Bombyx mori]	NK2R_RABIT	Substance-K receptor;		pyroglutamylated RFamide peptide receptor
NVE4603	60	55	32	49	53	3	11	65	54	30	51	51	3	11	37.89	50	51	7	0.138	-2.86	-4.632	3.61845e-06	2.31908e-05	0.1186	0.1294	0.1265	0.1265	TRUE	0.274
NVE8502	29	46	20	67	65	3	6	31	46	19	70	63	3	6	33.84	32	66	4	0.138	-2.861	-4.183	2.87398e-05	0.000155994	0.0845	0.1432	0.1241	0.1241	TRUE	0.1697	fgenesh1_pg.scaffold_202000009	214505	NEMVEDRAFT_v1g214505		sigP:1^20^0.877^YES		Transmembrane protease, serine 5 [Crassostrea gigas]	CEL3B_HUMAN	Chymotrypsin-like elastase family member 3B;	CELA1	chymotrypsin-like elastase family member 1	GO:0000122,GO:0005575,GO:0005576,GO:0006355,GO:0006357,GO:0006950,GO:0006952,GO:0006954,GO:0007154,GO:0007165,GO:0007166,GO:0007275,GO:0008150,GO:0009611,GO:0009653,GO:0009791,GO:0009887,GO:0009889,GO:0009890,GO:0009891,GO:0009892,GO:0009893,GO:0009987,GO:0010468,GO:0010556,GO:0010557,GO:0010558,GO:0010604,GO:0010605,GO:0010628,GO:0010629,GO:0016055,GO:0019219,GO:0019222,GO:0023052,GO:0031016,GO:…
NVE8360	755	1148	604	708	703	131	110	814	1136	572	738	676	124	109	595.66	841	707	116	0.139	-2.845	-10.609	2.70583e-26	1.23476e-24	0.0603	0.0213	0.036	0.036	TRUE	0.0921	fgenesh1_pg.scaffold_20000110	200272	NEMVEDRAFT_v1g200272				P450c17 [Anguilla japonica]	CP17A_CHICK	Steroid 17-alpha-hydroxylase/17,20 lyase;	CYP17A1	Cytochrome P450, family 17, subfamily A, polypeptide 1	GO:0000003,GO:0002237,GO:0003006,GO:0003674,GO:0003824,GO:0004497,GO:0004508,GO:0005488,GO:0005575,GO:0005622,GO:0005623,GO:0005737,GO:0005739,GO:0005783,GO:0005789,GO:0006082,GO:0006629,GO:0006694,GO:0006702,GO:0006704,GO:0006725,GO:0006805,GO:0006950,GO:0007275,GO:0007276,GO:0007292,GO:0007399,GO:0007417,GO:0007420,GO:0007548,GO:0008150,GO:0008152,GO:0008202,GO:0008209,GO:0008211,GO:0008395,GO:…
NVE541	239	289	204	274	233	36	34	258	286	193	286	224	34	34	187.78	246	255	34	0.139	-2.851	-9.514	1.83846e-21	5.94409e-20	0.0266	0.0373	0.033	0.033	TRUE	0.2545	e_gw.101.173.1	110685	NEMVEDRAFT_v1g110685		sigP:1^24^0.46^YES		BnaA01g10000D [Brassica napus]	NOTUM_MOUSE	Palmitoleoyl-protein carboxylesterase NOTUM {ECO:0000250|UniProtKB:Q6P988};		notum pectinacetylesterase homolog (Drosophila)
NVE7896	148	193	163	216	192	16	32	160	191	154	225	185	15	32	137.38	168	205	24	0.139	-2.845	-8.334	7.79103e-17	1.74916e-15	0.0224	0.0458	0.0399	0.0399	TRUE	0.0999	estExt_fgenesh1_pg.C_1980007	246120	NEMVEDRAFT_v1g246120								BTB (POZ) domain-containing protein
NVE6210	69	157	83	171	306	4	25	74	155	79	178	294	4	25	115.65	103	236	14	0.139	-2.851	-5.284	1.26173e-07	1.01255e-06	0.3543	0.0518	0.123	0.123	TRUE	1.3207	e_gw.17.277.1	87929	NEMVEDRAFT_v1g87929				GL19950 [Drosophila persimilis]	FBP3_STRPU	Fibropellin-3;		EGF-like domain
NVE9624	12	10	9	15	8	2	1	13	10	9	16	8	2	1	8.23	11	12	2	0.139	-2.842	-2.441	0.0146437	0.0401109	0	0.5458	0.3419	0.3419	TRUE	0.0976	e_gw.2224.3.1	147990	NEMVEDRAFT_v1g147990		sigP:1^19^0.789^YES		EGF-like domain-containing protein [Polysphondylium pallidum PN500]	SCUB1_HUMAN	Signal peptide, CUB and EGF-like domain-containing protein 1;		Calcium-binding EGF domain
NVE19867	187	195	114	202	143	14	34	202	193	108	211	138	13	34	128.24	168	174	24	0.14	-2.834	-6.681	2.37516e-11	3.06731e-10	0.1419	0.0481	0.0765	0.0765	TRUE	0.6969
NVE7444	98	96	75	106	93	9	17	106	95	71	111	89	9	17	71	91	100	13	0.14	-2.835	-6.458	1.06285e-10	1.27691e-09	0.0288	0.0756	0.0606	0.0606	TRUE	0.2332	gw.19.64.1	34192	NEMVEDRAFT_v1g34192				carbohydrate sulfotransferase 1 precursor [Salmo salar]	CHST1_DANRE	Carbohydrate sulfotransferase 1;	CHST1	Carbohydrate (Keratan sulfate Gal-6) sulfotransferase 1	GO:0000139,GO:0003674,GO:0003824,GO:0005575,GO:0005622,GO:0005623,GO:0005737,GO:0005794,GO:0005975,GO:0005976,GO:0005996,GO:0006012,GO:0006022,GO:0006023,GO:0006024,GO:0006082,GO:0006790,GO:0006807,GO:0008146,GO:0008150,GO:0008152,GO:0009058,GO:0009059,GO:0009987,GO:0012505,GO:0016020,GO:0016021,GO:0016740,GO:0016782,GO:0018146,GO:0019318,GO:0030203,GO:0031090,GO:0031224,GO:0042339,GO:0043170,GO:…
NVE20511	28	12	33	10	19	1	6	30	12	31	10	18	1	6	15.56	24	14	4	0.14	-2.832	-3.163	0.00156092	0.00573342	0.2318	0.2952	0.2756	0.2756	TRUE	0.8222	fgenesh1_pg.scaffold_57000092	205240	NEMVEDRAFT_v1g205240					GEFE_DICDI	Ras guanine nucleotide exchange factor E;
NVE22505	230	282	213	236	244	26	44	248	279	202	246	235	25	44	182.54	243	240	34	0.141	-2.83	-9.376	6.82406e-21	2.10606e-19	0.0242	0.0379	0.0338	0.0338	TRUE	0.1256	estExt_fgenesh1_pg.C_70156	238674	NEMVEDRAFT_v1g238674
NVE19198	28	21	33	50	35	6	2	30	21	31	52	34	6	2	25.1	27	43	4	0.141	-2.822	-3.889	0.000100606	0.000491211	0	0.1883	0.1384	0.1384	TRUE	0.1923	fgenesh1_pg.scaffold_50000057	204373	NEMVEDRAFT_v1g204373				C007-H6 G-protein coupled receptor [Acropora millepora]	AA2AR_HUMAN	Adenosine receptor A2a;	DRD5	dopamine receptor	GO:0000003,GO:0001588,GO:0001932,GO:0001933,GO:0001963,GO:0001975,GO:0001990,GO:0001992,GO:0001993,GO:0001994,GO:0003008,GO:0003013,GO:0003018,GO:0003044,GO:0003073,GO:0003321,GO:0003674,GO:0004871,GO:0004872,GO:0004888,GO:0004930,GO:0004952,GO:0005488,GO:0005575,GO:0005623,GO:0005886,GO:0005887,GO:0005903,GO:0006140,GO:0006469,GO:0006873,GO:0006874,GO:0006875,GO:0006950,GO:0007154,GO:0007165,GO:…
NVE5212	4785	5589	4699	5041	5044	491	968	5157	5531	4447	5257	4851	467	963	3810.26	5045	5054	715	0.142	-2.82	-11.552	7.24365e-31	4.54626e-29	0.0661	0.0151	0.0335	0.0335	TRUE	0.0874	e_gw.157.89.1	118978	NEMVEDRAFT_v1g118978		sigP:1^17^0.865^YES		proline 4-hydroxylase [Homo sapiens]	P4HTM_MOUSE	Transmembrane prolyl 4-hydroxylase;	P4HTM	Prolyl 4-hydroxylase, transmembrane (Endoplasmic reticulum)	GO:0005575,GO:0005622,GO:0005623,GO:0005737,GO:0005783,GO:0005789,GO:0012505,GO:0016020,GO:0031090,GO:0042175,GO:0043226,GO:0043227,GO:0043229,GO:0043231,GO:0044422,GO:0044424,GO:0044425,GO:0044432,GO:0044444,GO:0044446,GO:0044464
NVE2177	427	553	385	431	494	57	76	460	547	364	449	475	54	76	346.58	457	462	65	0.142	-2.819	-11.149	7.24343e-29	3.9202e-27	0.0276	0.0266	0.027	0.027	TRUE	0.0812
NVE5841	951	1629	1299	1102	1465	222	159	1025	1612	1229	1149	1409	211	158	970.5	1289	1279	184	0.143	-2.804	-12.29	1.02933e-34	8.54187e-33	0.0385	0.0185	0.0265	0.0265	TRUE	0.1743					sigP:1^16^0.863^YES
NVE3920	192	176	150	189	154	16	35	207	174	142	197	148	15	35	131.18	174	172	25	0.143	-2.806	-7.649	2.03146e-14	3.57386e-13	0.0638	0.0473	0.0519	0.0519	TRUE	0.0717
NVE12349	174	271	227	99	100	27	39	188	268	215	103	96	26	39	133.48	224	100	32	0.144	-2.798	-8.841	9.50116e-19	2.47251e-17	0.0221	0.0467	0.0378	0.0378	TRUE	0.1212	gw.286.43.1	40721	NEMVEDRAFT_v1g40721				BMP binding endothelial regulator [Xenopus laevis]	KCP_MOUSE	Kielin/chordin-like protein;
NVE12826	119	126	139	95	105	23	15	128	125	132	99	101	22	15	88.76	128	100	18	0.144	-2.798	-7.89	3.0158e-15	5.77538e-14	0	0.0633	0.0377	0.0377	TRUE	0.0039	e_gw.3.710.1	80365	NEMVEDRAFT_v1g80365
NVE12895	248	378	287	388	421	45	46	267	374	272	405	405	43	46	258.71	304	405	44	0.145	-2.783	-10.552	4.95777e-26	2.20404e-24	0.0178	0.0309	0.0256	0.0256	TRUE	0.304	e_gw.3.276.1	80480	NEMVEDRAFT_v1g80480				LOC100124781 protein [Xenopus (Silurana) tropicalis]	FCNV4_CERRY	Ryncolin-4;
NVE17010	216	367	284	60	98	47	39	233	363	269	63	94	45	39	157.86	288	78	42	0.145	-2.788	-8.813	1.22231e-18	3.14071e-17	0.0434	0.0417	0.0423	0.0423	TRUE	0.1638					sigP:1^21^0.82^YES		complement component factor B/C2 [Branchiostoma belcheri tsingtauense]	CO2_BOVIN	Complement C2;	C2	Complement component 2	GO:0001848,GO:0002237,GO:0002250,GO:0002252,GO:0002253,GO:0002376,GO:0002443,GO:0002449,GO:0002455,GO:0002460,GO:0002673,GO:0002682,GO:0002684,GO:0002697,GO:0002920,GO:0003674,GO:0003824,GO:0004175,GO:0004252,GO:0005488,GO:0005515,GO:0005575,GO:0005576,GO:0005615,GO:0005623,GO:0005886,GO:0006950,GO:0006952,GO:0006955,GO:0006956,GO:0006957,GO:0006958,GO:0006959,GO:0007584,GO:0008150,GO:0008152,GO:…
NVE6265	83	85	73	97	70	8	16	89	84	69	101	67	8	16	62.09	81	84	12	0.145	-2.788	-6.028	1.66008e-09	1.71567e-08	0.0334	0.0844	0.0685	0.0685	TRUE	0.1038	e_gw.170.49.1	120436	NEMVEDRAFT_v1g120436		sigP:1^18^0.602^YES		C-type natriuretic peptide receptor precursor [Squalus acanthias]	ANPRB_MOUSE	Atrial natriuretic peptide receptor 2;		guanylate cyclase	GO:0003674,GO:0003824,GO:0004383,GO:0004872,GO:0005575,GO:0006139,GO:0006163,GO:0006164,GO:0006182,GO:0006725,GO:0006753,GO:0006793,GO:0006796,GO:0006807,GO:0008150,GO:0008152,GO:0009058,GO:0009117,GO:0009150,GO:0009152,GO:0009165,GO:0009187,GO:0009190,GO:0009259,GO:0009260,GO:0009975,GO:0009987,GO:0016020,GO:0016829,GO:0016849,GO:0018130,GO:0019438,GO:0019637,GO:0019693,GO:0034641,GO:0034654,GO:…
NVE8066	4100	3954	2720	4486	3425	317	760	4419	3913	2574	4678	3294	301	756	2847.82	3635	3986	528	0.145	-2.782	-5.609	2.0384e-08	1.82836e-07	0.1407	0.0155	0.0571	0.1407	TRUE	0.3318
NVE7589	16	39	5	16	18	3	3	17	39	5	17	17	3	3	14.34	20	17	3	0.145	-2.79	-2.796	0.00517543	0.0165469	0.4079	0.319	0.3543	0.3543	TRUE	0.1366							Centrosomal protein of 135 kDa (Cep135 protein) (Centrosomal protein 4), putative [Schistosoma mansoni]
NVE25130	322	452	431	321	342	46	74	347	447	408	335	329	44	74	283.31	401	332	59	0.146	-2.776	-10.85	1.99489e-27	9.8021e-26	0.0206	0.0294	0.0268	0.0268	TRUE	0.1044	fgenesh1_pg.scaffold_89000069	208207	NEMVEDRAFT_v1g208207
NVE2140	72	75	51	82	56	8	12	78	74	48	86	54	8	12	51.28	67	70	10	0.146	-2.774	-5.434	5.49697e-08	4.65653e-07	0.0583	0.0993	0.0843	0.0843	TRUE	0.3559	fgenesh1_pm.scaffold_12000017	228271	NEMVEDRAFT_v1g228271	*		fez-family	Fez family zinc finger protein 2 [Tupaia chinensis]	FEZF2_MOUSE	Fez family zinc finger protein 2;		fez family zinc finger	GO:0007275,GO:0007399,GO:0008150,GO:0009987,GO:0019827,GO:0022008,GO:0030154,GO:0032501,GO:0032502,GO:0044699,GO:0044707,GO:0044763,GO:0044767,GO:0045595,GO:0045596,GO:0048468,GO:0048519,GO:0048523,GO:0048699,GO:0048731,GO:0048856,GO:0048863,GO:0048864,GO:0048869,GO:0050767,GO:0050789,GO:0050793,GO:0050794,GO:0051093,GO:0051239,GO:0051960,GO:0060284,GO:0065007,GO:2000026
NVE17327	1175	1206	1033	885	745	186	160	1266	1193	978	923	716	177	159	773.23	1146	820	168	0.147	-2.77	-13.986	1.90139e-44	2.73094e-42	0.0176	0.0196	0.0188	0.0188	TRUE	0.1323	e_gw.43.248.1	96522	NEMVEDRAFT_v1g96522	*			PR domain zinc finger protein 14 [Crassostrea gigas]	PRD14_HUMAN	PR domain zinc finger protein 14;	PRDM14	PR domain containing 14	GO:0000003,GO:0000902,GO:0000904,GO:0001708,GO:0001894,GO:0003006,GO:0005575,GO:0005622,GO:0005623,GO:0005634,GO:0007275,GO:0007276,GO:0007281,GO:0007399,GO:0007409,GO:0008150,GO:0009566,GO:0009653,GO:0009987,GO:0010468,GO:0016043,GO:0019222,GO:0019953,GO:0022008,GO:0022412,GO:0022414,GO:0030030,GO:0030154,GO:0030182,GO:0031175,GO:0032501,GO:0032502,GO:0032504,GO:0032989,GO:0032990,GO:0042592,GO:…
NVE8852	555	756	731	336	317	125	81	598	748	692	350	305	119	81	413.24	679	328	100	0.147	-2.768	-12.426	1.87792e-35	1.65006e-33	0.0177	0.0246	0.0222	0.0222	TRUE	0.0855	estExt_GenewiseH_1.C_210095	180651	NEMVEDRAFT_v1g180651		sigP:1^19^0.874^YES		cathepsin L protease [Cerebratulus lacteus]	CATL_DROME	Cathepsin L;		cathepsin	GO:0000323,GO:0002165,GO:0003674,GO:0003824,GO:0004175,GO:0004197,GO:0005575,GO:0005622,GO:0005623,GO:0005737,GO:0005764,GO:0005773,GO:0007275,GO:0007431,GO:0007435,GO:0007552,GO:0007559,GO:0008150,GO:0008152,GO:0008219,GO:0008233,GO:0008234,GO:0009056,GO:0009057,GO:0009653,GO:0009790,GO:0009791,GO:0009792,GO:0009886,GO:0009888,GO:0009987,GO:0012501,GO:0016265,GO:0016271,GO:0016787,GO:0019538,GO:…
NVE15609	1028	1105	832	1133	971	112	187	1108	1094	787	1182	934	106	186	770.93	996	1058	146	0.147	-2.77	-11.007	3.5216e-28	1.81809e-26	0.0557	0.0196	0.0321	0.0321	TRUE	0.269	estExt_GenewiseH_1.C_3730008	194407	NEMVEDRAFT_v1g194407				Vesicular glutamate transporter 2 [Zootermopsis nevadensis]	VGLU3_RAT	Vesicular glutamate transporter 3;		solute carrier family 17	GO:0003674,GO:0005215,GO:0005316,GO:0005436,GO:0005575,GO:0005622,GO:0005623,GO:0005737,GO:0005783,GO:0006810,GO:0006811,GO:0006812,GO:0006814,GO:0006817,GO:0006820,GO:0008150,GO:0008324,GO:0008509,GO:0009987,GO:0015075,GO:0015077,GO:0015081,GO:0015103,GO:0015114,GO:0015291,GO:0015293,GO:0015294,GO:0015296,GO:0015370,GO:0015672,GO:0015698,GO:0016528,GO:0016529,GO:0022804,GO:0022857,GO:0022890,GO:…
NVE7303	547	612	503	607	540	49	118	590	606	476	633	519	47	117	426.77	557	576	82	0.147	-2.768	-9.171	4.66607e-20	1.34727e-18	0.0979	0.0242	0.0447	0.0447	TRUE	0.1272	estExt_fgenesh1_pg.C_1870016	245957	NEMVEDRAFT_v1g245957		sigP:1^25^0.655^YES		Golgi-associated plant pathogenesis-related protein 1 [Heterocephalus glaber]	GAPR1_MOUSE	Golgi-associated plant pathogenesis-related protein 1;		GLI pathogenesis-related 2	GO:0005575,GO:0005576
NVE143	624	755	543	743	614	60	134	672	747	514	775	590	57	133	498.45	644	682	95	0.147	-2.762	-9.131	6.77026e-20	1.92995e-18	0.0993	0.0228	0.046	0.046	TRUE	0.2276	e_gw.1.15.1	79043	NEMVEDRAFT_v1g79043		sigP:1^16^0.633^YES		dickkopf3 [Saccoglossus kowalevskii]	DKK3_CHICK	Dickkopf-related protein 3;
NVE17057	109	111	106	120	103	12	21	117	110	100	125	99	11	21	83.45	109	112	16	0.147	-2.763	-7.106	1.19621e-12	1.73815e-11	0.0063	0.0664	0.0472	0.0472	TRUE	0.0343	e_gw.42.278.1	96136	NEMVEDRAFT_v1g96136				Contactin-associated protein-like 2 precursor [Daphnia pulex]	CNTP2_MOUSE	Contactin-associated protein-like 2;		Inherit from KOG: contactin associated protein-like
NVE6689	9	20	11	9	4	1	3	10	20	10	9	4	1	3	8.15	13	6	2	0.147	-2.768	-2.481	0.0131061	0.0365197	0	0.5506	0.3892	0.3892	TRUE	0.5209	gw.177.53.1	25267	NEMVEDRAFT_v1g25267	*			Zic family member 1 (odd-paired homolog, Drosophila) [Saccoglossus kowalevskii]	ZIC1_XENLA	Zinc finger protein ZIC 1;
NVE17415	223	205	134	269	199	32	26	240	203	127	281	191	30	26	156.88	190	236	28	0.148	-2.753	-7.613	2.6698e-14	4.65159e-13	0.0703	0.0419	0.0526	0.0526	TRUE	0.2421
NVE24789	71	63	104	81	129	9	15	77	62	98	84	124	9	15	67.04	79	104	12	0.148	-2.759	-5.955	2.59811e-09	2.6317e-08	0.0494	0.0792	0.0688	0.0688	TRUE	0.1711					sigP:1^20^0.758^YES
NVE8565	61	64	61	84	100	11	8	66	63	58	88	96	10	8	55.57	62	92	9	0.148	-2.754	-5.919	3.23997e-09	3.24228e-08	0	0.0927	0.0552	0.0552	TRUE	0.0243	e_gw.203.16.1	123745	NEMVEDRAFT_v1g123745	*			homeobox protein BarH-like 1 [Rattus norvegicus]	BARX2_HUMAN	Homeobox protein BarH-like 2;	BSX	brain-specific homeobox	GO:0001071,GO:0003674,GO:0003676,GO:0003677,GO:0003700,GO:0005488,GO:0005575,GO:0005622,GO:0005623,GO:0005634,GO:0005654,GO:0005667,GO:0005737,GO:0006355,GO:0006357,GO:0007275,GO:0007399,GO:0007417,GO:0007420,GO:0007610,GO:0007626,GO:0007631,GO:0008150,GO:0009653,GO:0009889,GO:0009891,GO:0009893,GO:0009987,GO:0010468,GO:0010556,GO:0010557,GO:0010604,GO:0010628,GO:0019219,GO:0019222,GO:0022008,GO:…
NVE3369	38	51	59	8	6	8	7	41	50	56	8	6	8	7	25.13	49	7	8	0.148	-2.754	-4.608	4.06365e-06	2.57958e-05	0	0.188	0.1177	0.1177	TRUE	0.0904								TXND2_HUMAN	Thioredoxin domain-containing protein 2;
NVE47	9355	8099	6838	9844	7032	849	1641	10082	8015	6471	10266	6763	807	1632	6290.76	8189	8514	1220	0.149	-2.748	-9.859	6.25407e-23	2.25287e-21	0.1023	0.0147	0.0443	0.0443	TRUE	0.1087	estExt_fgenesh1_pg.C_10057	237717	NEMVEDRAFT_v1g237717				carbamoylphosphate synthase large subunit [Microcoleus sp. PCC 7113]
NVE7870	681	966	641	690	848	108	128	734	956	607	720	816	103	127	580.22	766	768	115	0.15	-2.736	-11.743	7.66042e-32	5.24891e-30	0.0321	0.0215	0.0257	0.0257	TRUE	0.1587	e_gw.197.16.1	123159	NEMVEDRAFT_v1g123159					PRY1_YEAST	Protein PRY1 {ECO:0000305};		SCP
NVE13133	228	283	177	245	286	29	42	246	280	168	255	275	28	42	184.74	231	265	35	0.15	-2.739	-8.617	6.90033e-18	1.66425e-16	0.0433	0.0377	0.0397	0.0397	TRUE	0.2759	estExt_fgenesh1_pg.C_300116	240491	NEMVEDRAFT_v1g240491
NVE16920	174	158	130	188	154	20	28	188	156	123	196	148	19	28	122.56	156	172	24	0.15	-2.733	-7.737	1.01488e-14	1.84873e-13	0.0353	0.0497	0.0444	0.0444	TRUE	0.0851	e_gw.411.35.1	137770	NEMVEDRAFT_v1g137770		sigP:1^18^0.831^YES		hypothetical protein [Mycoplasma bovis]	SPT5_SCHPO	Transcription elongation factor spt5;
NVE14534	106	203	199	174	276	31	21	114	201	188	181	265	29	21	142.95	168	223	25	0.15	-2.736	-7.417	1.19968e-13	1.94783e-12	0.0677	0.0446	0.053	0.053	TRUE	0.5436								TLL2_XENLA	Tolloid-like protein 2;
NVE18950	188	136	121	281	123	13	33	203	135	115	293	118	12	33	129.74	151	206	22	0.15	-2.74	-5.783	7.35793e-09	6.99753e-08	0.2176	0.0477	0.1009	0.1009	TRUE	0.6165					sigP:1^15^0.903^YES
NVE13072	50	75	71	52	50	7	13	54	74	67	54	48	7	13	45.31	65	51	10	0.15	-2.741	-5.537	3.07548e-08	2.69387e-07	0	0.1105	0.0753	0.0753	TRUE	0.1292							sodium-dependent glucose transporter 1 [Salpingoeca rosetta]			MFSD4	Major facilitator superfamily domain containing 4	GO:0005575,GO:0016020
NVE5153	36	66	45	27	52	5	10	39	65	43	28	50	5	10	34.22	49	39	8	0.15	-2.741	-4.542	5.58196e-06	3.46645e-05	0.0854	0.1418	0.1221	0.1221	TRUE	0.4676								CHIT1_HUMAN	Chitotriosidase-1;		chitin binding	GO:0000003,GO:0005575,GO:0005623,GO:0006810,GO:0006897,GO:0006898,GO:0007275,GO:0008150,GO:0009790,GO:0009792,GO:0016192,GO:0032501,GO:0032502,GO:0044464,GO:0044699,GO:0044707,GO:0044767,GO:0048856,GO:0051179,GO:0051234,GO:0071944
NVE20690	16	9	14	11	16	0	4	17	9	13	11	15	0	4	10.03	13	13	2	0.15	-2.74	-2.539	0.011116	0.0317685	0.0241	0.45	0.3437	0.3437	TRUE	0.0864								CSMD1_HUMAN	CUB and sushi domain-containing protein 1;
NVE2100	5410	7836	7283	5283	7093	758	1348	5830	7755	6892	5509	6821	720	1341	4981.28	6826	6165	1030	0.151	-2.728	-11.564	6.29268e-31	3.98288e-29	0.0603	0.0149	0.0315	0.0315	TRUE	0.087	e_gw.12.407.1	85822	NEMVEDRAFT_v1g85822				thioredoxin-like protein TLP19 [Anolis carolinensis]	TXD12_MOUSE	Thioredoxin domain-containing protein 12;	TXNDC12	Thioredoxin domain containing 12 (Endoplasmic reticulum)	GO:0005575,GO:0005622,GO:0005623,GO:0005737,GO:0005783,GO:0005788,GO:0031974,GO:0043226,GO:0043227,GO:0043229,GO:0043231,GO:0043233,GO:0044422,GO:0044424,GO:0044432,GO:0044444,GO:0044446,GO:0044464,GO:0070013
NVE25087	144	189	160	158	164	16	35	155	187	151	165	158	15	35	123.74	164	162	25	0.151	-2.724	-7.861	3.80592e-15	7.239e-14	0.0204	0.0493	0.0434	0.0434	TRUE	0.1018	fgsh_est.C_scaffold_89000006	232845	NEMVEDRAFT_v1g232845					GELA_DICDI	Gelation factor;
NVE1213	124	262	177	388	455	22	36	134	259	168	405	438	21	36	208.48	187	422	28	0.151	-2.725	-7.765	8.18072e-15	1.50367e-13	0.073	0.035	0.0482	0.0482	TRUE	0.6911	e_gw.11.143.1	85362	NEMVEDRAFT_v1g85362		sigP:1^19^0.887^YES		peptidase S1 and S6 chymotrypsin/Hap [Herpetosiphon aurantiacus]	CPP1_ACRMI	CUB and peptidase domain-containing protein 1 {ECO:0000303|PubMed:23765379};		Tryp_SPc
NVE1537	79	66	56	67	64	6	15	85	65	53	70	62	6	15	50.78	68	66	10	0.151	-2.723	-5.41	6.2861e-08	5.26528e-07	0.041	0.1001	0.0833	0.0833	TRUE	0.1394	estExt_fgenesh1_pg.C_1120022	244175	NEMVEDRAFT_v1g244175
NVE11245	227	293	306	436	472	43	43	245	290	290	455	454	41	43	259.49	275	454	42	0.152	-2.717	-11.109	1.13854e-28	6.08831e-27	0	0.0308	0.0191	0.0191	TRUE	0.0674	estExt_fgenesh1_pg.C_260030	240210	NEMVEDRAFT_v1g240210		sigP:1^22^0.625^YES		udp-glucose 4-epimerase [Nannochloropsis gaditana]	CP41B_ARATH	Chloroplast stem-loop binding protein of 41 kDa b, chloroplastic;		NAD dependent epimerase/dehydratase family
NVE23301	347	348	280	594	524	63	40	374	344	265	619	504	60	40	315.19	328	562	50	0.152	-2.714	-10.13	4.05913e-24	1.58724e-22	0.0297	0.0279	0.0285	0.0285	TRUE	0.2152	estExt_fgenesh1_pg.C_750035	242934	NEMVEDRAFT_v1g242934		sigP:1^24^0.729^YES
NVE26151	250	307	218	363	406	42	39	269	304	206	379	390	40	39	232.46	260	384	40	0.152	-2.722	-9.953	2.4461e-23	9.07406e-22	0.0177	0.0328	0.0268	0.0268	TRUE	0.2439	estExt_fgenesh1_pg.C_990001	243799	NEMVEDRAFT_v1g243799		sigP:1^20^0.683^YES		megakaryocyte-associated tyrosine-protein kinase [Capsaspora owczarzaki ATCC 30864]	CD97_HUMAN	CD97 antigen;		FiBrilliN
NVE5209	1658	1594	1070	1578	974	228	229	1787	1577	1013	1646	937	217	228	1057.66	1459	1292	222	0.152	-2.715	-9.922	3.32526e-23	1.21941e-21	0.0799	0.0181	0.0403	0.0403	TRUE	0.2941	estExt_gwp.C_1570049	170793	NEMVEDRAFT_v1g170793				Protein phosphatase 1 regulatory subunit 12B [Brugia malayi]	MYPT2_MOUSE	Protein phosphatase 1 regulatory subunit 12B;		Ankyrin repeat
NVE16132	435	395	312	210	174	43	77	469	391	295	219	167	41	77	236.96	385	193	59	0.152	-2.715	-8.767	1.83719e-18	4.65657e-17	0.0676	0.0324	0.0443	0.0443	TRUE	0.0623	e_gw.39.86.1	95464	NEMVEDRAFT_v1g95464
NVE2081	98	144	104	98	135	10	26	106	143	98	102	130	10	26	87.7	116	116	18	0.152	-2.715	-6.456	1.07572e-10	1.29167e-09	0.0697	0.0639	0.0653	0.0653	TRUE	0.2819
NVE22087	27	59	29	41	38	6	6	29	58	27	43	37	6	6	29.41	38	40	6	0.152	-2.716	-4.181	2.89697e-05	0.000157166	0	0.1627	0.1328	0.1328	TRUE	1.0454
NVE11248	20	27	10	21	17	3	3	22	27	9	22	16	3	3	14.55	19	19	3	0.152	-2.72	-3.061	0.0022067	0.00780344	0	0.3147	0.2342	0.2342	TRUE	0.2763	fgenesh1_pg.scaffold_26000034	201105	NEMVEDRAFT_v1g201105				ABC transporter substrate-binding protein [Marinobacter algicola]				Ligand-gated ion channel
NVE23911	15	19	14	18	12	2	3	16	19	13	19	12	2	3	11.92	16	16	2	0.152	-2.722	-2.929	0.0034034	0.0114122	0	0.3811	0.2335	0.2335	TRUE	0.0795
NVE25285	908	1091	903	747	744	101	202	979	1080	855	779	716	96	201	672.03	971	748	148	0.153	-2.711	-10.494	9.20257e-26	4.01935e-24	0.0653	0.0205	0.0341	0.0341	TRUE	0.0788	estExt_fgenesh1_pg.C_90114	238889	NEMVEDRAFT_v1g238889				putative ATP synthase F1, delta subunit [Clostridium celatum]
NVE5500	201	304	257	190	248	46	34	217	301	243	198	239	44	34	182.12	254	218	39	0.153	-2.708	-9.45	3.39185e-21	1.0719e-19	0.0192	0.038	0.0307	0.0307	TRUE	0.1977	estExt_gwp.C_160322	160897	NEMVEDRAFT_v1g160897				retinol dehydrogenase 16 (all-trans) precursor [Xenopus laevis]	RDH7_RAT	Retinol dehydrogenase 7;		Dehydrogenase
NVE12147	77	86	93	90	147	19	8	83	85	88	94	141	18	8	73.91	85	118	13	0.153	-2.708	-6.205	5.45804e-10	6.01808e-09	0.0305	0.0732	0.0605	0.0605	TRUE	0.0047	e_gw.28.207.1	91941	NEMVEDRAFT_v1g91941							CHRNA3	cholinergic receptor, nicotinic	GO:0000003,GO:0000902,GO:0000904,GO:0001505,GO:0001508,GO:0001661,GO:0001666,GO:0001775,GO:0001932,GO:0001934,GO:0002376,GO:0002682,GO:0002684,GO:0002694,GO:0002696,GO:0003008,GO:0003012,GO:0003014,GO:0003674,GO:0004871,GO:0004872,GO:0004888,GO:0004889,GO:0005215,GO:0005216,GO:0005230,GO:0005231,GO:0005261,GO:0005488,GO:0005575,GO:0005622,GO:0005623,GO:0005856,GO:0005886,GO:0005887,GO:0005892,GO:…
NVE24279	51	44	37	44	42	6	8	55	44	35	46	40	6	8	33.35	45	43	7	0.153	-2.705	-4.712	2.44897e-06	1.61197e-05	0	0.1451	0.0953	0.0953	TRUE	0.1072
NVE4554	25	26	15	35	30	3	4	27	26	14	36	29	3	4	19.86	22	32	4	0.153	-2.707	-3.474	0.000511968	0.00212547	0	0.2342	0.1606	0.1606	TRUE	0.406							putative FH protein [Pyrus x bretschneideri]	KCTD7_DANRE	BTB/POZ domain-containing protein KCTD7;
NVE25933	21	22	14	13	15	1	5	23	22	13	14	14	1	5	13.08	19	14	3	0.153	-2.709	-3.024	0.00249307	0.00867347	0.0151	0.3484	0.2428	0.2428	TRUE	0.2735	fgenesh1_pg.scaffold_96000007	208719	NEMVEDRAFT_v1g208719		sigP:1^18^0.867^YES		TPA: SCO-spondin precursor [Danio rerio]	TSP2_HUMAN	Thrombospondin-2;		protein Hydra magnipapillata
NVE3648	782	852	695	806	687	100	147	843	843	658	841	661	95	146	583.73	781	751	120	0.154	-2.697	-11.637	2.6804e-31	1.74078e-29	0.0333	0.0215	0.0256	0.0256	TRUE	0.1521	e_gw.138.47.1	116420	NEMVEDRAFT_v1g116420					M3K12_MOUSE	Mitogen-activated protein kinase kinase kinase 12;	MAP3K13	mitogen-activated protein kinase kinase kinase	GO:0000165,GO:0000186,GO:0000902,GO:0000904,GO:0001932,GO:0001934,GO:0002119,GO:0002164,GO:0003008,GO:0003674,GO:0003824,GO:0004672,GO:0004674,GO:0004702,GO:0004709,GO:0004871,GO:0005057,GO:0005488,GO:0005515,GO:0005575,GO:0005622,GO:0005623,GO:0005737,GO:0005829,GO:0005886,GO:0006325,GO:0006355,GO:0006464,GO:0006468,GO:0006793,GO:0006796,GO:0006950,GO:0006996,GO:0007030,GO:0007154,GO:0007165,GO:…
NVE14798	10	8	20	3	10	3	1	11	8	19	3	10	3	1	7.74	13	6	2	0.154	-2.7	-2.352	0.018678	0.0492643	0	0.5789	0.4261	0.4261	TRUE	0.2911							multidrug resistance protein 4 [Oncorhynchus mykiss]	MRP4_HUMAN	Multidrug resistance-associated protein 4;
NVE1640	903	839	799	907	951	124	148	973	830	756	946	915	118	147	669.29	853	930	132	0.155	-2.687	-13.93	4.13791e-44	5.75864e-42	0.0108	0.0205	0.0166	0.0166	TRUE	0.1194	fgenesh1_pg.scaffold_114000008	209936	NEMVEDRAFT_v1g209936				hypothetical protein [Paramecium tetraurelia strain d4-2]
NVE1277	269	186	147	322	201	24	41	290	184	139	336	193	23	41	172.25	204	264	32	0.155	-2.686	-6.744	1.53603e-11	2.00678e-10	0.133	0.0394	0.0711	0.0711	TRUE	0.3158	fgenesh1_pg.scaffold_11000088	198676	NEMVEDRAFT_v1g198676		sigP:1^24^0.664^YES		Sulfiredoxin-1 [Acromyrmex echinatior]	SRX_DROME	Putative sulfiredoxin;	SRXN1	sulfiredoxin 1	GO:0003674,GO:0003824,GO:0005575,GO:0005622,GO:0005623,GO:0005737,GO:0005829,GO:0006950,GO:0006979,GO:0008150,GO:0008152,GO:0016491,GO:0016667,GO:0044424,GO:0044444,GO:0044464,GO:0044710,GO:0050896,GO:0055114
NVE17617	69	78	49	69	60	7	14	74	77	46	72	58	7	14	49.74	66	65	10	0.155	-2.686	-5.304	1.13065e-07	9.16549e-07	0.0498	0.1019	0.0847	0.0847	TRUE	0.4109
NVE10698	32	33	19	46	30	2	7	34	33	18	48	29	2	7	24.4	28	38	4	0.155	-2.687	-3.642	0.000270557	0.00119777	0.1087	0.1933	0.167	0.167	TRUE	0.463
NVE7311	9	17	12	5	9	1	3	10	17	11	5	9	1	3	7.95	13	7	2	0.155	-2.694	-2.469	0.0135615	0.0375971	0	0.5639	0.3562	0.3562	TRUE	0.2329	fgenesh1_pg.scaffold_187000026	213925	NEMVEDRAFT_v1g213925
NVE1851	141	128	140	157	176	17	27	152	127	132	164	169	16	27	112.44	137	166	22	0.156	-2.676	-7.922	2.34462e-15	4.53266e-14	0	0.0529	0.0356	0.0356	TRUE	0.0611					sigP:1^23^0.771^YES
NVE11581	90	93	78	96	92	12	16	97	92	74	100	88	11	16	68.39	88	94	14	0.156	-2.683	-6.5	8.02779e-11	9.78621e-10	0	0.0779	0.0509	0.0509	TRUE	0.1234	fgenesh1_pg.scaffold_266000018	216620	NEMVEDRAFT_v1g216620								Fibrinogen beta and gamma chains, C-terminal globular domain
NVE7944	30	28	26	16	16	2	7	32	28	25	17	15	2	7	17.94	28	16	4	0.156	-2.68	-3.606	0.00031075	0.00135355	0	0.2578	0.1716	0.1716	TRUE	0.0674	estExt_fgenesh1_pg.C_1990007	246132	NEMVEDRAFT_v1g246132		sigP:1^21^0.814^YES		A disintegrin and metalloproteinase with thrombospondin motifs 14 [Myotis brandtii]	ATS17_HUMAN	A disintegrin and metalloproteinase with thrombospondin motifs 17;	ADAMTS16	ADAM metallopeptidase with thrombospondin type 1, motif	GO:0005575,GO:0005576,GO:0005578,GO:0031012,GO:0044421
NVE4639	21	32	22	18	17	1	7	23	32	21	19	16	1	7	16.88	25	18	4	0.156	-2.676	-3.326	0.000879691	0.00346464	0.0171	0.2732	0.2082	0.2082	TRUE	0.2212	fgenesh1_pg.scaffold_15000002	199410	NEMVEDRAFT_v1g199410				Cytosolic phospholipase A2 [Crassostrea gigas]	PA24A_HUMAN	Cytosolic phospholipase A2;
NVE8041	25	22	18	15	9	2	5	27	22	17	16	9	2	5	13.85	22	12	4	0.156	-2.679	-3.165	0.00155226	0.00570724	0	0.3299	0.2241	0.2241	TRUE	0.0605
NVE20514	145	148	124	126	127	20	25	156	146	117	131	122	19	25	102.5	140	126	22	0.157	-2.676	-7.812	5.63784e-15	1.05093e-13	0	0.0567	0.0381	0.0381	TRUE	0.1415	estExt_GenewiseH_1.C_570187	184439	NEMVEDRAFT_v1g184439				GF19843 [Drosophila ananassae]	DLRB2_HUMAN	Dynein light chain roadblock-type 2;	DYNLRB2	dynein light chain roadblock-type	GO:0000003,GO:0000902,GO:0000904,GO:0003674,GO:0003774,GO:0003777,GO:0003824,GO:0005488,GO:0005515,GO:0005575,GO:0005622,GO:0005623,GO:0005694,GO:0005737,GO:0005813,GO:0005815,GO:0005819,GO:0005856,GO:0005858,GO:0005868,GO:0005874,GO:0005875,GO:0005876,GO:0005930,GO:0005938,GO:0006139,GO:0006152,GO:0006163,GO:0006195,GO:0006200,GO:0006725,GO:0006753,GO:0006793,GO:0006796,GO:0006807,GO:0006928,GO:…
NVE21018	20	15	21	18	10	1	5	22	15	20	19	10	1	5	12.94	19	14	3	0.157	-2.675	-2.94	0.00327941	0.0110328	0.0379	0.352	0.2571	0.2571	TRUE	0.1173	fgenesh1_pg.scaffold_6000145	197632	NEMVEDRAFT_v1g197632				neuropeptide receptor A1 [Danaus plexippus]	OX1R_MOUSE	Orexin receptor type 1;	ALSTR	Galanin receptor	GO:0001653,GO:0003008,GO:0003674,GO:0004871,GO:0004872,GO:0004888,GO:0004930,GO:0005488,GO:0005575,GO:0005623,GO:0005886,GO:0005887,GO:0007154,GO:0007165,GO:0007166,GO:0007186,GO:0007218,GO:0007267,GO:0007268,GO:0008150,GO:0008188,GO:0008261,GO:0008528,GO:0009987,GO:0016020,GO:0016021,GO:0019226,GO:0023052,GO:0030594,GO:0031224,GO:0031226,GO:0032501,GO:0033218,GO:0035637,GO:0038023,GO:0042277,GO:…
NVE6209	405	375	515	414	536	56	84	436	371	487	432	515	53	84	339.85	431	474	68	0.158	-2.661	-10.692	1.10563e-26	5.18257e-25	0.025	0.0268	0.0262	0.0262	TRUE	0.1094	estExt_fgenesh1_pg.C_170097	239633	NEMVEDRAFT_v1g239633					MFD6A_DANRE	Major facilitator superfamily domain-containing protein 6-A;		major facilitator superfamily domain containing 6
NVE4253	191	268	214	246	248	30	43	206	265	203	257	239	29	43	177.13	225	248	36	0.158	-2.659	-9.159	5.25897e-20	1.50874e-18	0.0149	0.0387	0.0304	0.0304	TRUE	0.1853	fgenesh1_pg.scaffold_144000050	211833	NEMVEDRAFT_v1g211833				hypothetical protein RHTO_07611 [Rhodosporidium toruloides NP11]
NVE4602	304	456	211	285	226	46	60	328	451	200	297	217	44	60	228.07	326	257	52	0.158	-2.659	-7.647	2.05826e-14	3.61704e-13	0.0997	0.0332	0.0572	0.0572	TRUE	0.0632
NVE22859	124	174	115	202	155	29	16	134	172	109	211	149	28	16	116.84	138	180	22	0.158	-2.665	-7.067	1.58209e-12	2.27524e-11	0.054	0.0514	0.0523	0.0523	TRUE	0.1678	fgenesh1_pg.scaffold_72000017	206649	NEMVEDRAFT_v1g206649				beta-1,4-N-acetyl-galactosaminyl transferase 4 [Capsaspora owczarzaki ATCC 30864]	B4GN4_HUMAN	N-acetyl-beta-glucosaminyl-glycoprotein 4-beta-N-acetylgalactosaminyltransferase 1;
NVE5495	20	11	15	15	14	1	4	22	11	14	16	13	1	4	11.52	16	14	2	0.158	-2.666	-2.774	0.00554004	0.0175523	0	0.3936	0.268	0.268	TRUE	0.2448	e_gw.16.290.1	87545	NEMVEDRAFT_v1g87545				nicotinic acetylcholine receptor subunit Dalpha7 [Drosophila melanogaster]	ACHA7_CHICK	Neuronal acetylcholine receptor subunit alpha-7;		cholinergic receptor, nicotinic
NVE12607	790	997	633	834	802	134	131	851	987	599	870	771	127	130	619.39	812	820	128	0.159	-2.657	-11.458	2.14006e-30	1.30654e-28	0.0333	0.021	0.026	0.026	TRUE	0.1787
NVE13352	257	324	250	317	300	23	67	277	321	237	331	289	22	67	220.25	278	310	44	0.159	-2.657	-7.599	2.99358e-14	5.18749e-13	0.1193	0.0338	0.0558	0.0558	TRUE	0.087	e_gw.304.53.1	132075	NEMVEDRAFT_v1g132075	*			photoreceptor-specific nuclear receptor protein [Saccoglossus kowalevskii]	NR2E3_BOVIN	Photoreceptor-specific nuclear receptor;		nuclear receptor subfamily 2, group E, member 1
NVE4023	23	26	15	32	16	1	6	25	26	14	33	15	1	6	17.2	22	24	4	0.159	-2.652	-3.079	0.00207722	0.0074041	0.1691	0.2683	0.2388	0.2388	TRUE	0.3528	fgenesh1_pg.scaffold_141000029	211633	NEMVEDRAFT_v1g211633				RecName: Full=Venom prothrombin activator pseutarin-C non-catalytic subunit; Short=PCNS; Short=vPA; AltName: Full=Venom coagulation factor Va-like protein; Contains: RecName: Full=Pseutarin-C non-catalytic subunit heavy chain; Contains: RecName: Full=Pseutarin-C non-catalytic subunit light chain; Flags: Precursor [Pseudonaja textilis]	FA5V_PSETE	Venom prothrombin activator pseutarin-C non-catalytic subunit;		FA58C
NVE10655	17	22	6	14	10	3	2	18	22	6	15	10	3	2	10.69	15	12	2	0.159	-2.65	-2.6	0.00932039	0.0274095	0	0.4232	0.3319	0.3319	TRUE	0.5527
NVE17947	333	243	271	36	26	51	43	359	240	256	38	25	48	43	144.23	285	32	46	0.16	-2.643	-8.555	1.18049e-17	2.78421e-16	0.0348	0.0443	0.0408	0.0408	TRUE	0.3784
NVE7460	19	25	29	23	27	6	2	20	25	27	24	26	6	2	18.61	24	25	4	0.16	-2.647	-3.527	0.000419646	0.00177743	0	0.249	0.1575	0.1575	TRUE	0.0696	fgenesh1_pg.scaffold_19000026,e_gw.19.153.1	200035	NEMVEDRAFT_v1g200034,NEMVEDRAFT_v1g88892				RecName: Full=Pancreatic secretory granule membrane major glycoprotein GP2; AltName: Full=Pancreatic zymogen granule membrane protein GP-2; Flags: Precursor [Canis lupus familiaris]	GP2_CANFA
NVE18041	1354	1720	1583	1174	1288	212	302	1459	1702	1498	1224	1239	201	300	1089.17	1553	1232	250	0.161	-2.631	-13.959	2.78867e-44	3.95461e-42	0.0177	0.018	0.0179	0.0179	TRUE	0.0566					sigP:1^26^0.704^YES					C1QTNF9B	C1q and tumor necrosis factor related protein
NVE10704	863	1028	794	757	649	122	175	930	1017	751	789	624	116	174	628.91	899	706	145	0.161	-2.635	-11.534	8.84156e-31	5.45741e-29	0.0333	0.0209	0.0256	0.0256	TRUE	0.1658
NVE4769	354	459	397	354	500	79	55	382	454	376	369	481	75	55	313.03	404	425	65	0.161	-2.636	-10.776	4.4538e-27	2.16e-25	0.0188	0.0279	0.0245	0.0245	TRUE	0.092	estExt_fgenesh1_pg.C_1500027	245219	NEMVEDRAFT_v1g245219		sigP:1^16^0.902^YES		oncoprotein-induced transcript 3 protein [Cricetulus griseus]	OIT3_MOUSE	Oncoprotein-induced transcript 3 protein;		oncoprotein induced transcript 3
NVE22046	696	743	526	845	633	76	142	750	735	498	881	609	72	141	526.65	661	745	106	0.161	-2.633	-8.965	3.09489e-19	8.33462e-18	0.0854	0.0223	0.0436	0.0436	TRUE	0.369					sigP:1^18^0.905^YES
NVE22739	88	96	127	62	81	10	24	95	95	120	65	78	10	24	69.42	103	72	17	0.161	-2.639	-6.213	5.19714e-10	5.76185e-09	0.0278	0.077	0.065	0.065	TRUE	0.136	fgenesh1_pg.scaffold_71000064	206595	NEMVEDRAFT_v1g206595				UV-wavelength like opsin [Megoura viciae]
NVE16499	58	89	137	67	56	13	18	63	88	130	70	54	12	18	62.03	94	62	15	0.161	-2.632	-5.658	1.52828e-08	1.39709e-07	0.0774	0.0845	0.0818	0.0818	TRUE	0.1105								VKT1_BITGA	Kunitz-type serine protease inhibitor bitisilin-1;
NVE12131	15	18	12	6	14	3	2	16	18	11	6	13	3	2	9.99	15	10	2	0.161	-2.638	-2.687	0.00720901	0.0219971	0	0.4521	0.2886	0.2886	TRUE	0.1527	fgenesh1_pg.scaffold_28000057	201440	NEMVEDRAFT_v1g201440				neuropeptide GPCR A23 [Nilaparvata lugens]	NPYR_DROME	Neuropeptide Y receptor;	GALR2	Galanin receptor	GO:0001653,GO:0003008,GO:0003674,GO:0004871,GO:0004872,GO:0004888,GO:0004930,GO:0005488,GO:0005575,GO:0005623,GO:0005886,GO:0005887,GO:0007154,GO:0007165,GO:0007166,GO:0007186,GO:0007218,GO:0007267,GO:0007268,GO:0008150,GO:0008188,GO:0008261,GO:0008528,GO:0009987,GO:0016020,GO:0016021,GO:0019226,GO:0023052,GO:0030594,GO:0031224,GO:0031226,GO:0032501,GO:0033218,GO:0035637,GO:0038023,GO:0042277,GO:…
NVE25277	1036	1369	1007	1147	1090	144	238	1117	1355	953	1196	1048	137	237	863.17	1142	1122	187	0.163	-2.613	-10.952	6.4691e-28	3.27194e-26	0.0498	0.019	0.0293	0.0293	TRUE	0.12	e_gw.9.75.1	84193	NEMVEDRAFT_v1g84193		sigP:1^21^0.808^YES		transmembrane prolyl 4-hydroxylase [Mus musculus]	P4HTM_MOUSE	Transmembrane prolyl 4-hydroxylase;
NVE10008	1023	1430	1247	1205	1128	139	271	1103	1415	1180	1257	1085	132	269	920.11	1233	1171	200	0.163	-2.619	-10.286	8.11281e-25	3.29901e-23	0.0665	0.0187	0.0342	0.0342	TRUE	0.1344	fgenesh1_pg.scaffold_230000011	215519	NEMVEDRAFT_v1g215519				E3 ubiquitin-protein ligase TRIM71 [Danio rerio]	LIN41_DANRE	E3 ubiquitin-protein ligase TRIM71;		NHL repeat
NVE19738	110	127	111	158	141	19	20	119	126	105	165	136	18	20	98.23	117	150	19	0.163	-2.618	-7.445	9.7103e-14	1.5881e-12	0	0.0585	0.0371	0.0371	TRUE	0.0504	e_gw.53.207.1	99489	NEMVEDRAFT_v1g99489	*			SIX homeobox 1 [Strongylocentrotus purpuratus]	SIX1B_DANRE	Homeobox protein six1b;		SIX homeobox	GO:0001071,GO:0003674,GO:0003700,GO:0005575,GO:0005622,GO:0005623,GO:0005634,GO:0006355,GO:0008150,GO:0009889,GO:0010468,GO:0010556,GO:0019219,GO:0019222,GO:0031323,GO:0031326,GO:0043226,GO:0043227,GO:0043229,GO:0043231,GO:0044424,GO:0044464,GO:0050789,GO:0050794,GO:0051171,GO:0051252,GO:0060255,GO:0065007,GO:0080090,GO:2000112,GO:2001141
NVE9981	116	155	170	222	397	19	30	125	153	161	232	382	18	30	157.21	146	307	24	0.163	-2.617	-7.36	1.84437e-13	2.93293e-12	0.0532	0.0418	0.0458	0.0458	TRUE	0.1118							EGF-like protein [Podocoryna carnea]	FBP1_STRPU	Fibropellin-1;		EGF-like domain
NVE4640	81	87	72	73	63	13	14	87	86	68	76	61	12	14	57.79	80	68	13	0.163	-2.615	-6.072	1.25958e-09	1.32421e-08	0	0.0897	0.0575	0.0575	TRUE	0.1154	gw.15.13.1	30785	NEMVEDRAFT_v1g30785				Cytosolic phospholipase A2 [Crassostrea gigas]	PA24A_XENTR	Cytosolic phospholipase A2;
NVE12988	547	721	531	350	416	110	93	590	714	503	365	400	105	92	395.37	602	382	98	0.164	-2.61	-11.767	5.76174e-32	3.99682e-30	0.0173	0.025	0.0218	0.0218	TRUE	0.0883	fgenesh1_pm.scaffold_3000046	227950	NEMVEDRAFT_v1g227950				TNF-receptor-associated factor 1 [Hydractinia echinata]	TRAF4_HUMAN	TNF receptor-associated factor 4;		TNF receptor-associated factor
NVE2026	157	248	192	123	161	36	31	169	245	182	128	155	34	31	134.92	199	142	32	0.164	-2.612	-8.312	9.38458e-17	2.09851e-15	0.023	0.0464	0.037	0.037	TRUE	0.306	fgenesh1_pg.scaffold_119000068	210306	NEMVEDRAFT_v1g210306				Pc06g01510 [Penicillium rubens Wisconsin 54-1255]				NAD dependent epimerase dehydratase
NVE313	156	203	138	189	180	22	34	168	201	131	197	173	21	34	132.08	167	185	28	0.164	-2.609	-7.726	1.11276e-14	2.01556e-13	0.0321	0.0471	0.042	0.042	TRUE	0.0952	fgenesh1_pg.scaffold_10000061	198469	NEMVEDRAFT_v1g198469				Sodium/potassium/calcium exchanger 2 [Heterocephalus glaber]	NCKX2_RAT	Sodium/potassium/calcium exchanger 2;	SLC24A5	Solute carrier family 24 (Sodium potassium calcium exchanger), member	GO:0002065,GO:0003674,GO:0005215,GO:0005575,GO:0005622,GO:0005623,GO:0005737,GO:0005886,GO:0006810,GO:0006811,GO:0006812,GO:0006813,GO:0006814,GO:0006816,GO:0008150,GO:0008273,GO:0008324,GO:0009888,GO:0009987,GO:0012505,GO:0015075,GO:0015077,GO:0015079,GO:0015081,GO:0015085,GO:0015291,GO:0015297,GO:0015298,GO:0015368,GO:0015491,GO:0015672,GO:0016020,GO:0016021,GO:0016023,GO:0022804,GO:0022821,GO:…
[truncated: 7,746 more rows]

## Sheet: GDF5lMO2dvsStdMO2d-padj<0.05
Id	StdMO-1	StdMO-2	StdMO-3	GDF5lMO-1	GDF5lMO-2	BMP2/4MO-1	BMP2/4MO-2	norm.StdMO-1	norm.StdMO-2	norm.StdMO-3	norm.GDF5lMO-1	norm.GDF5lMO-2	norm.BMP2/4MO-1	norm.BMP2/4MO-2	baseMean	StdMO_2d	GDF5lMO_2d	BMP2/4MO_2d	FoldChange	log2FoldChange	stat	pvalue	padj	dispGeneEst	dispFit	dispMAP	dispersion	betaConv	maxCooks	JGIGene	JGIProtID	ENSEMBL_ID	TF	SignalP	Curated ID	BLAST Hit	Trinotate Name	Trinotate Descr	Emapper Name	Emapper Annotation	Emapper GO Terms
[truncated: 504 more rows]

[truncated: 2 more sheets: ChIP-RNA-Seq-overlap_2x, enrichment-of-BRE-in-funct-cat]
